# Supplementary material
Source: Research Square preprint supplement (doi:10.21203/rs.3.rs-8945185/v1)
Supplement: Supplementary file 1 [file 04e043773864cf00a84c389e.xlsx]

## Sheet: Sheet1
Supplementary Table 3. GWAS summary statistics. “Trait” indicates the phenotype name; “Number of Cases” and “Number of Controls” apply to binary traits; “Sample Size” denotes the total number of GWAS participants; and “Category” specifies the classification of each phenotype: (1) Neuropsychiatric, neuropsychiatric disorders; (2) Neurodegenerative, neurodegenerative disorders; (3) Morph/Dev, morph…
Trait	Number of Cases	Number of Controls	Sample Size	Number of SNPs	Category	Population	Pubmed ID
Frontotemporal dementia - TDP subtype	515	2509	3024	494577	Neurodegenerative	European	20154673
Frontotemporal dementia	2154	4308	6462	4812430	Neurodegenerative	European	24943344
Generalized epilepsy with tonic-clonic seizures	228	29677	29905	4988035	Neuropsychiatric	European	30531953
Juvenile absence epilepsy	415	29677	30092	4986340	Neuropsychiatric	European	30531953
Childhood absence epilepsy	793	29677	30470	4979765	Neuropsychiatric	European	30531953
Focal epilepsy, documented hippocampal sclerosis	803	29677	30480	4948714	Neuropsychiatric	European	30531953
Caudate volume	NA	NA	30717	7277001	Morph/Dev	European	25607358
Hippocampus volume	NA	NA	30717	7276413	Morph/Dev	European	25607358
Intracranial volume	NA	NA	30717	7484970	Morph/Dev	European	25607358
Nucleus accumbens volume	NA	NA	30717	7272653	Morph/Dev	European	25607358
Pallidum volume	NA	NA	30717	7270265	Morph/Dev	European	25607358
Putamen volume	NA	NA	30717	7282885	Morph/Dev	European	25607358
Thalamus volume	NA	NA	30717	7288410	Morph/Dev	European	25607358
Juvenile myoclonic epilepsy	1181	29677	30858	4983225	Neuropsychiatric	European	30531953
Focal epilepsy, documented lesion negative	2716	29677	32393	4988872	Neuropsychiatric	European	30531953
Generalized epilepsy, all documented cases	3769	29677	33446	4867068	Neuropsychiatric	European	30531953
Focal epilepsy, documented lesion other than hippocampal sclerosis	5786	29677	35463	4987264	Neuropsychiatric	European	30531953
Focal epilepsy, all documented cases	9671	29677	39348	4862782	Neuropsychiatric	European	30531953
Epilepsy, all documented cases	15212	29677	44889	4880493	Neuropsychiatric	European	30531953
Autism spectrum disorder	18382	27969	46351	9112386	Neuropsychiatric	European	30804558
ADHD	20183	35191	55374	8047420	Neuropsychiatric	European	30478444
Anorexia nervosa(AN)	16992	55525	72517	7818559	Neuropsychiatric	European	31308545
Multiple sclerosis	47429	68374	115803	6304359	Neurodegenerative	European	31604244
Amyotrophic lateral sclerosis(ALS)	27205	110881	138086	8709431	Neurodegenerative	European	34873335
Intelligence (IQ)	NA	NA	269867	9295118	Cognitive	European	29942086
cognitive performance	NA	NA	300486	10098325	Cognitive	European	31043617
Schizophrenia (SCZ)	69369	236642	306011	5426250	Neuropsychiatric	European	35396580
Age at menarche (AAM)	NA	NA	370000	8525686	Morph/Dev	European	28436984
Insomnia	109402	277131	386533	10862567	Neuropsychiatric	European	30804565
Alzheimer’s disease (AD)	71880	315120	387000	13283327	Neurodegenerative	European	35379992
Bipolar disorder (BIP)	41917	371549	413466	13413244	Neuropsychiatric	European	34002096
Neuroticism	NA	NA	449484	7374623	Neuropsychiatric	European	29942085
Parkinson’s disease (PD)	33674	449056	482730	17481233	Neurodegenerative	European	31701892
Major depression (MD)	170756	329443	500199	8483302	Neuropsychiatric	European	30718901
Smoking initiation (SmkInt)	311629	321173	632802	7731760	Morph/Dev	European	30643251
Educational attainment (EA)	NA	NA	766345	10101242	Cognitive	European	35361970
