# Supplementary material
Source: Research Square preprint supplement (doi:10.21203/rs.3.rs-8945185/v1)
Supplement: Supplementary file 2 [file 730b3b696a6d7002e97d5553.xlsx]

## Sheet: Sheet1
Supplementary Table 1. Number of individuals in each dataset after quality control.N: sample size; m: number of variants; WGS: whole-genome sequencing.
Cohort	N	m	Genotyping
LIBD	128	6650820	Array
HBCC	129	6565722	Array
MSBB(BM10)	183	10444061	WGS
Mayo	288	9820326	WGS
BrainGVEx	384	7064078	Array
CMC	469	7396529	Array
ROSMAP	832	10301379	WGS
