# Supplementary material
Source: Research Square preprint supplement (doi:10.21203/rs.3.rs-8945185/v1)
Supplement: Supplementary file 3 [file b1b6ac1387c0ec418c5c2cfd.xlsx]

## Sheet: Sheet1
Supplementary Table 5.Summary-based Mendelian randomization results (SMR)
Cell	Trait	probeID	ProbeChr	Gene	Probe_bp	topSNP	topSNP_chr	topSNP_bp	A1	A2	Freq	b_GWAS	se_GWAS	p_GWAS	b_eQTL	se_eQTL	p_eQTL	b_SMR	se_SMR	p_SMR	p_HEIDI	nsnp_HEIDI	eGeneType
Ast	AAM	ENSG00000070061	9	ENSG00000070061.16_10	111629177	rs10979586	9	111647764	T	C	0.317441	-0.0144758	0.00228676	2.44777e-10	-0.22316	0.0302413	1.59105e-13	0.0648674	0.013501	1.55028e-06	0.275725	20	PCG
Ast	AD	ENSG00000186868	17	ENSG00000186868.17_7	43971892	rs55686102	17	44202608	T	C	0.220469	-0.0553	0.0099	2.008e-08	0.394087	0.0347798	9.22531e-30	-0.140324	0.0280081	5.43901e-07	0.395908	20	PCG
Ast	ALS	ENSG00000092108	14	ENSG00000092108.22_12	31091496	rs7153509	14	31182989	G	C	0.328941	0.0898	0.012	5.78e-14	-0.174715	0.0271887	1.30987e-10	-0.513979	0.105427	1.08688e-06	0.465501	19	PCG
Ast	EA	ENSG00000120088	17	ENSG00000120088.15_7	43861645	rs62062278	17	44093860	G	A	0.220238	-0.01773	0.00212	5.34e-17	-0.2007	0.0329195	1.08298e-09	0.088341	0.0179315	8.36819e-07	0.598562	20	PCG
Ast	EA	ENSG00000186868	17	ENSG00000186868.17_7	43971892	rs55686102	17	44202608	T	C	0.220469	-0.01719	0.00214	8.16e-16	0.394087	0.0347798	9.22531e-30	-0.0436199	0.0066564	5.63654e-11	0.294679	20	PCG
Ast	EA	ENSG00000105926	7	ENSG00000105926.16_8	24612886	rs12672003	7	24647222	G	A	0.112864	0.02331	0.00271	6.84e-18	-0.253616	0.0426392	2.71523e-09	-0.0919107	0.0187872	9.9716e-07	0.811725	20	PCG
Ast	IQ	ENSG00000197728	12	ENSG00000197728.11_10	56435134	rs10876864	12	56401085	G	A	0.405975	0.0142077	0.00276252	2.708e-07	0.184241	0.0161377	3.44719e-30	0.0771146	0.0164452	2.74308e-06	0.0756839	20	PCG
Ast	IQ	ENSG00000001617	3	ENSG00000001617.12_7	50192477	rs3774751	3	50209053	T	G	0.474283	0.024803	0.00275406	2.141e-19	0.156524	0.0278433	1.892e-08	0.158462	0.0332288	1.85321e-06	0.164761	20	PCG
Ast	Neuroticism	ENSG00000119682	14	ENSG00000119682.18_11	75120139	rs1045430	14	75130235	T	G	0.477057	-0.00226452	0.000319712	1.409e-12	-0.164972	0.0253754	7.96515e-11	0.0137267	0.00286596	1.67146e-06	0.233753	20	PCG
Ast	Neuroticism	ENSG00000120088	17	ENSG00000120088.15_7	43861645	rs62062278	17	44093860	G	A	0.220238	0.00281041	0.000248775	1.363e-29	-0.2007	0.0329195	1.08298e-09	-0.0140031	0.00260997	8.08454e-08	0.144102	20	PCG
Ast	PD	ENSG00000120088	17	ENSG00000120088.15_7	43861645	rs62062278	17	44093860	G	A	0.220238	-0.2376	0.0253	5.972e-21	-0.2007	0.0329195	1.08298e-09	1.18386	0.231511	3.16033e-07	0.02985	20	PCG
Ast	SCZ	ENSG00000142599	1	ENSG00000142599.19_9	8412456	rs1763839	1	8473336	A	G	0.325589	0.053	0.0088	2.044e-09	0.221613	0.029772	9.79346e-14	0.239156	0.0510789	2.83971e-06	0.635666	20	PCG
Ast	SCZ	ENSG00000140265	15	ENSG00000140265.12_5	43650369	rs7167882	15	43678663	C	A	0.301722	-0.0467023	0.0083	1.536e-08	-0.309281	0.0291955	3.19615e-26	0.151003	0.0303872	6.71987e-07	0.116031	20	PCG
Ast	SCZ	ENSG00000186868	17	ENSG00000186868.17_7	43971892	rs55686102	17	44202608	T	C	0.220469	-0.058599	0.0109	7.107e-08	0.394087	0.0347798	9.22531e-30	-0.148696	0.0306142	1.19124e-06	0.957751	20	PCG
Ast	SCZ	ENSG00000167491	19	ENSG00000167491.17_9	19496634	rs12975119	19	19550464	C	A	0.355871	0.0598031	0.0081	1.358e-13	0.220499	0.0276913	1.68256e-15	0.271217	0.0500957	6.16409e-08	0.890097	20	PCG
Ex	AAM	ENSG00000109919	11	ENSG00000109919.10_7	47638866	rs10838738	11	47663049	G	A	0.35356	-0.0151193	0.00222124	9.98656e-12	0.397013	0.0285593	6.21531e-44	-0.0380827	0.00622957	9.76478e-10	0.0179197	20	PCG
Ex	BIP	ENSG00000198315	6	ENSG00000198315.11_5	28109660	rs9295761	6	28147987	G	A	0.216251	-0.0584953	0.0113	2.379e-07	-0.497955	0.0346314	7.04e-47	0.117471	0.0241187	1.11289e-06	0.0733011	20	PCG
Ex	EA	ENSG00000254685	1	ENSG00000254685.7_8	74663895	rs12044425	1	74527778	A	G	0.47203	-0.01273	0.0017	7.64e-14	-0.161111	0.0259623	5.44896e-10	0.0790137	0.0165366	1.76949e-06	0.0676654	20	PCG
Ex	EA	ENSG00000228696	17	ENSG00000228696.10_10	44352149	rs199528	17	44843136	T	C	0.206657	-0.01589	0.00212	6.47e-14	-0.21013	0.0279859	5.98339e-14	0.0756197	0.0142555	1.12912e-07	0.011668	19	PCG
Ex	IQ	ENSG00000109919	11	ENSG00000109919.10_7	47638866	rs10838738	11	47663049	G	A	0.35356	-0.0159663	0.00287267	2.722e-08	0.397013	0.0285593	6.21531e-44	-0.040216	0.0077926	2.45898e-07	0.703416	20	PCG
Ex	Neuroticism	ENSG00000109919	11	ENSG00000109919.10_7	47638866	rs10838738	11	47663049	G	A	0.35356	-0.00238391	0.000397054	1.929e-09	0.397013	0.0285593	6.21531e-44	-0.00600462	0.0010894	3.55026e-08	0.4143	20	PCG
In	AAM	ENSG00000109919	11	ENSG00000109919.10_7	47638866	rs11605348	11	47606483	A	G	0.336627	-0.0150568	0.00222774	1.3913e-11	-0.253155	0.0286445	9.76128e-19	0.0594766	0.0110783	7.92818e-08	0.0332861	20	PCG
In	AAM	ENSG00000133103	13	ENSG00000133103.17_6	40229763	rs9548884	13	40266064	T	A	0.337436	0.0138798	0.00224309	6.10035e-10	0.234428	0.0316327	1.25413e-13	0.0592071	0.0124652	2.03608e-06	0.286322	20	PCG
In	AAM	ENSG00000173540	3	ENSG00000173540.14_7	49757117	rs62262722	3	49769419	C	G	0.179207	0.0184932	0.00280131	4.06682e-11	-0.255587	0.0338367	4.2352e-14	-0.0723557	0.0145563	6.66935e-07	0.0671786	20	PCG
In	AAM	ENSG00000172262	5	ENSG00000172262.11_7	43067682	rs6870418	5	43111526	C	T	0.307212	0.0147846	0.00233971	2.63312e-10	0.319603	0.0317526	7.85569e-24	0.0462592	0.00864373	8.71008e-08	0.111377	20	PCG
In	AD	ENSG00000186868	17	ENSG00000186868.17_7	43971892	rs74998289	17	43913558	G	T	0.217002	-0.0551	0.0098	1.841e-08	-0.424754	0.0358129	1.9013e-32	0.129722	0.0255334	3.76454e-07	0.0301512	20	PCG
In	AD	ENSG00000120071	17	ENSG00000120071.15_10	44107281	rs199451	17	44801784	A	G	0.206195	-0.0594	0.01	2.623e-09	0.400459	0.0293785	2.6199e-42	-0.14833	0.0272394	5.16818e-08	0.13838	20	PCG
In	AD	ENSG00000197062	6	ENSG00000197062.12_9	28234835	rs13408	6	28212748	A	G	0.398289	0.0438	0.0082	9.902e-08	0.338896	0.0280413	1.25816e-33	0.129243	0.0264541	1.0313e-06	0.03	20	PCG
In	AD	ENSG00000120885	8	ENSG00000120885.22_8	27454433	rs2279590	8	27456253	T	C	0.415569	-0.0957	0.0083	8.292e-31	-0.195233	0.0289469	1.53543e-11	0.490185	0.0842	5.82615e-09	0.626806	17	PCG
In	BIP	ENSG00000198315	6	ENSG00000198315.11_5	28109660	rs9380054	6	28067537	A	G	0.217175	-0.0582972	0.0113	2.524e-07	0.648078	0.0337941	5.73037e-82	-0.089954	0.0180561	6.29563e-07	0.309135	20	PCG
In	EA	ENSG00000181754	1	ENSG00000181754.7_6	110046799	rs14184	1	110047110	G	C	0.301953	0.01274	0.00185	6.1e-12	-0.25048	0.0314303	1.59476e-15	-0.0508623	0.0097613	1.88222e-07	0.245429	20	PCG
In	EA	ENSG00000197728	12	ENSG00000197728.11_10	56435134	rs7297175	12	56473808	T	C	0.414066	0.01559	0.00173	2.49e-19	-0.257664	0.0170683	1.71955e-51	-0.0605051	0.00781948	1.01194e-14	0.0373773	20	PCG
In	EA	ENSG00000100461	14	ENSG00000100461.18_8	23362412	rs4981445	14	23376315	G	A	0.43227	-0.01169	0.00172	9.77e-12	0.251687	0.0288186	2.46893e-18	-0.0464466	0.0086594	8.15273e-08	0.120674	20	PCG
In	EA	ENSG00000120088	17	ENSG00000120088.15_7	43861645	rs1378358	17	44787312	T	C	0.19978	-0.01679	0.00214	4.28e-15	0.224812	0.0337007	2.54369e-11	-0.0746847	0.0146955	3.73173e-07	0.27965	20	PCG
In	EA	ENSG00000186868	17	ENSG00000186868.17_7	43971892	rs111676341	17	44183403	G	A	0.218736	-0.01739	0.00213	3.62e-16	-0.405616	0.0341952	1.8697e-32	0.0428731	0.00637493	1.75272e-11	0.526296	20	PCG
In	EA	ENSG00000198218	3	ENSG00000198218.11_8	49067139	rs6446200	3	49013376	G	C	0.250405	-0.01214	0.002	1.26e-09	-0.25691	0.0334488	1.58215e-14	0.0472539	0.0099224	1.91359e-06	0.0262645	20	PCG
In	EA	ENSG00000173540	3	ENSG00000173540.14_7	49757117	rs62262722	3	49769419	C	G	0.179207	-0.01971	0.00227	3.98e-18	-0.255587	0.0338367	4.2352e-14	0.0771165	0.0135318	1.20589e-08	0.143527	20	PCG
In	EA	ENSG00000125388	4	ENSG00000125388.20_8	2965297	rs13114014	4	2956731	T	C	0.315418	0.01295	0.00187	4.76e-12	0.181952	0.0287113	2.33821e-10	0.0711726	0.0152235	2.93699e-06	0.0175632	20	PCG
In	EA	ENSG00000236104	6	ENSG00000236104.3_7	33282182	rs1061801	6	33282338	A	G	0.190476	-0.01354	0.0022	8.34e-10	-0.282677	0.0380752	1.13482e-13	0.0478991	0.0101092	2.15661e-06	0.452874	11	PCG
In	EA	ENSG00000105926	7	ENSG00000105926.16_8	24612886	rs12672003	7	24647222	G	A	0.112864	0.02331	0.00271	6.84e-18	0.263002	0.0435069	1.49358e-09	0.0886307	0.0179204	7.58298e-07	0.885796	20	PCG
In	IQ	ENSG00000181754	1	ENSG00000181754.7_6	110046799	rs14184	1	110047110	G	C	0.301953	0.0176883	0.00299498	3.497e-09	-0.25048	0.0314303	1.59476e-15	-0.0706177	0.0148825	2.08482e-06	0.0603474	20	PCG
In	IQ	ENSG00000109919	11	ENSG00000109919.10_7	47638866	rs11605348	11	47606483	A	G	0.336627	-0.0166074	0.0028958	9.728e-09	-0.253155	0.0286445	9.76128e-19	0.0656019	0.0136362	1.50286e-06	0.731583	20	PCG
In	IQ	ENSG00000197728	12	ENSG00000197728.11_10	56435134	rs7297175	12	56473808	T	C	0.414066	0.0143798	0.00278733	2.478e-07	-0.257664	0.0170683	1.71955e-51	-0.0558084	0.0114319	1.05123e-06	0.294764	20	PCG
In	MDD	ENSG00000124140	20	ENSG00000124140.14_9	44651481	rs4578918	20	44721656	T	C	0.265257	0.0306	0.0049	4.187e-10	-0.268243	0.030824	3.24943e-18	-0.114076	0.0224837	3.90152e-07	0.21388	20	PCG
In	Neuroticism	ENSG00000109919	11	ENSG00000109919.10_7	47638866	rs11605348	11	47606483	A	G	0.336627	-0.00244576	0.000411605	2.809e-09	-0.253155	0.0286445	9.76128e-19	0.00966112	0.00195922	8.17675e-07	0.684102	20	PCG
In	Neuroticism	ENSG00000111707	12	ENSG00000111707.12_5	118814359	rs61943405	12	118842835	G	T	0.158056	0.00319699	0.000558915	1.065e-08	-0.433604	0.0397144	9.45217e-28	-0.00737307	0.00145519	4.04654e-07	0.178559	20	PCG
In	Neuroticism	ENSG00000120088	17	ENSG00000120088.15_7	43861645	rs1378358	17	44787312	T	C	0.19978	0.00286259	0.000267932	1.206e-26	0.224812	0.0337007	2.54369e-11	0.0127333	0.00225032	1.52756e-08	0.0814765	20	PCG
In	Neuroticism	ENSG00000124140	20	ENSG00000124140.14_9	44651481	rs4578918	20	44721656	T	C	0.265257	0.00265709	0.000407842	7.264e-11	-0.268243	0.030824	3.24943e-18	-0.00990554	0.00189929	1.8343e-07	0.0972645	20	PCG
In	PD	ENSG00000120088	17	ENSG00000120088.15_7	43861645	rs1378358	17	44787312	T	C	0.19978	-0.2241	0.0253	8.644e-19	0.224812	0.0337007	2.54369e-11	-0.996834	0.187069	9.89205e-08	0.034743	20	PCG
In	SCZ	ENSG00000174939	16	ENSG00000174939.11_8	29911695	rs8059619	16	29925445	C	T	0.461338	0.0513963	0.0078	3.451e-11	0.188927	0.0282988	2.45279e-11	0.272043	0.0580081	2.73558e-06	0.0518401	20	PCG
In	SCZ	ENSG00000169592	16	ENSG00000169592.15_10	30007384	rs11150580	16	30014564	T	C	0.451341	-0.0589008	0.0078	3.562e-14	0.159672	0.0264466	1.56484e-09	-0.368885	0.0782263	2.40986e-06	0.130364	20	PCG
In	SCZ	ENSG00000186868	17	ENSG00000186868.17_7	43971892	rs111676341	17	44183403	G	A	0.218736	-0.0579009	0.0109	9.533e-08	-0.405616	0.0341952	1.8697e-32	0.142748	0.0294443	1.24666e-06	0.692827	20	PCG
In	SCZ	ENSG00000120071	17	ENSG00000120071.15_10	44107281	rs199451	17	44801784	A	G	0.206195	-0.0546965	0.0109	5.279e-07	0.400459	0.0293785	2.6199e-42	-0.136585	0.0290046	2.48849e-06	0.0310234	20	PCG
In	SCZ	ENSG00000167491	19	ENSG00000167491.17_9	19496634	rs34277109	19	19487302	C	T	0.349515	0.0592967	0.0081	2.633e-13	-0.247251	0.0258577	1.15523e-21	-0.239824	0.0412588	6.14835e-09	0.417038	20	PCG
In	SCZ	ENSG00000116127	2	ENSG00000116127.19_10	73612885	rs6736866	2	73661986	G	C	0.22908	0.0551005	0.0102	7.465e-08	0.312807	0.0322773	3.28497e-22	0.176149	0.0373316	2.37606e-06	0.0413089	20	PCG
In	SCZ	ENSG00000183066	22	ENSG00000183066.14_6	42394728	rs133293	22	42382797	A	G	0.468562	0.0542028	0.0081	1.849e-11	0.151874	0.0235006	1.02935e-10	0.356893	0.0767738	3.34157e-06	0.399731	20	PCG
In	SCZ	ENSG00000183172	22	ENSG00000183172.9_5	42475694	rs6002592	22	42476754	C	A	0.327959	-0.0548006	0.0085	1.184e-10	0.277921	0.0293303	2.65308e-21	-0.19718	0.0369922	9.80368e-08	0.114081	20	PCG
In	SCZ	ENSG00000170571	5	ENSG00000170571.12_7	49692025	rs12520167	5	49479911	T	A	0.468736	0.0518996	0.0085	1.213e-09	0.29467	0.026405	6.42777e-29	0.176128	0.0328812	8.48528e-08	0.673637	20	PCG
In	SCZ	ENSG00000187987	6	ENSG00000187987.9_5	28399706	rs6905380	6	28374902	G	A	0.242141	-0.0679016	0.0093	3.213e-13	0.235867	0.0300923	4.57354e-15	-0.287881	0.0538852	9.16811e-08	0.0152594	20	PCG
In	SmokingInitiation	ENSG00000148842	10	ENSG00000148842.18_5	104678092	rs7067970	10	104913870	T	C	0.405744	0.0257077	0.00364658	1.79e-12	0.209561	0.027837	5.14668e-14	0.122674	0.0238398	2.66429e-07	0.240514	20	PCG
Oli	AAM	ENSG00000133103	13	ENSG00000133103.17_6	40229763	rs10467367	13	40227072	G	A	0.234686	0.0157489	0.00248961	2.51848e-10	-0.232263	0.0329588	1.8272e-12	-0.0678062	0.014404	2.50836e-06	0.406198	20	PCG
Oli	AAM	ENSG00000138031	2	ENSG00000138031.15_8	25042037	rs13393590	2	25147676	C	T	0.21469	-0.0165382	0.00258238	1.511e-10	-0.22271	0.0322145	4.73406e-12	0.074259	0.015806	2.62512e-06	0.0995912	20	PCG
Oli	EA	ENSG00000181754	1	ENSG00000181754.7_6	110046799	rs14184	1	110047110	G	C	0.301953	0.01274	0.00185	6.1e-12	0.232974	0.0317484	2.16603e-13	0.0546843	0.0108899	5.12534e-07	0.277425	20	PCG
Oli	EA	ENSG00000120088	17	ENSG00000120088.15_7	43861645	rs62062278	17	44093860	G	A	0.220238	-0.01773	0.00212	5.34e-17	-0.212877	0.0324852	5.6376e-11	0.0832874	0.0161467	2.4936e-07	0.518744	20	PCG
Oli	EA	ENSG00000115252	2	ENSG00000115252.18_8	183004762	rs1430154	2	183401789	C	G	0.255374	0.01	0.00198	4.38e-07	0.370781	0.0312321	1.65905e-32	0.0269701	0.00580323	3.36094e-06	0.159468	20	PCG
Oli	Neuroticism	ENSG00000120088	17	ENSG00000120088.15_7	43861645	rs62062278	17	44093860	G	A	0.220238	0.00281041	0.000248775	1.363e-29	-0.212877	0.0324852	5.6376e-11	-0.013202	0.00232905	1.44124e-08	0.0333919	18	PCG
Oli	PD	ENSG00000120088	17	ENSG00000120088.15_7	43861645	rs62062278	17	44093860	G	A	0.220238	-0.2376	0.0253	5.972e-21	-0.212877	0.0324852	5.6376e-11	1.11614	0.207689	7.69802e-08	0.341518	20	PCG
Oli	SCZ	ENSG00000174939	16	ENSG00000174939.11_8	29911695	rs3924855	16	29954955	A	G	0.457524	0.0544977	0.0078	2.477e-12	-0.197525	0.0281826	2.40445e-12	-0.275902	0.0557583	7.49082e-07	0.0861912	20	PCG
Ast	AAM	BrainMetalnc.65933	6	BrainMetalnc.65933	105183096	rs9404579	6	105229807	C	T	0.470007	0.0159489	0.00212629	6.34261e-14	0.206568	0.029384	2.06604e-12	0.077209	0.0150525	2.908e-07	0.0128243	20	LncRNA
Ast	AAM	ENSG00000286474	9	ENSG00000286474.1_1	11313396	rs10125961	9	11310612	C	T	0.466771	0.0131275	0.00215566	1.13064e-09	-0.239446	0.0204126	8.91524e-32	-0.0548246	0.0101436	6.48677e-08	0.112852	20	LncRNA
Ast	MDD	BrainMetalnc.75656	9	BrainMetalnc.75656	11313412	rs10125961	9	11310612	C	T	0.466771	-0.0219	0.0043	4.433e-07	-0.241069	0.0201542	5.6706e-33	0.0908454	0.0193869	2.78696e-06	0.0200251	20	LncRNA
Ast	Neuroticism	BrainMetalnc.27722	16	BrainMetalnc.27722	31004918	rs12445568	16	31004812	C	T	0.369279	-0.00233469	0.000376866	5.812e-10	-0.257316	0.0288872	5.21455e-19	0.00907324	0.00178398	3.65805e-07	0.561241	20	LncRNA
Ex	AAM	BrainMetalnc.3706	1	BrainMetalnc.3706	102337367	rs11164371	1	102528795	T	A	0.452959	0.0157826	0.00214535	1.88605e-13	-0.182137	0.0281375	9.60007e-11	-0.0866522	0.0178308	1.17564e-06	0.323945	20	LncRNA
Ex	AAM	ENSG00000224086	22	ENSG00000224086.6_8	22292956	rs240066	22	22292995	A	C	0.473706	-0.0125072	0.00212854	4.20387e-09	-0.18955	0.0193782	1.35048e-22	0.0659837	0.0130998	4.72886e-07	0.563583	20	LncRNA
Ex	AAM	BrainMetalnc.69738	7	BrainMetalnc.69738	74047306	rs2529287	7	74358919	T	C	0.199202	-0.0186125	0.00248331	6.62853e-14	-0.190898	0.0297228	1.33933e-10	0.0974995	0.0199918	1.07728e-06	0.474011	11	LncRNA
Ex	EA	BrainMetalnc.27551	16	BrainMetalnc.27551	28747048	rs62031607	16	28631530	T	A	0.373555	-0.01632	0.00181	1.8e-19	0.168275	0.0266409	2.67709e-10	-0.0969841	0.018747	2.29985e-07	0.261197	20	LncRNA
Ex	EA	ENSG00000264589	17	ENSG00000264589.4_9	43876755	rs62057151	17	43903842	T	C	0.220354	-0.01737	0.00209	9.61e-17	0.210774	0.0326585	1.09013e-10	-0.0824104	0.0161671	3.44293e-07	0.746095	20	LncRNA
Ex	EA	BrainMetalnc.51386	3	BrainMetalnc.51386	62453082	rs9874646	3	62462818	C	T	0.320157	-0.01065	0.00184	7.43e-09	-0.268536	0.0310463	5.17217e-18	0.0396596	0.0082446	1.50655e-06	0.0344591	20	LncRNA
Ex	EA	ENSG00000239519	3	ENSG00000239519.1_8	86041332	rs13083257	3	86042815	C	G	0.395573	0.01212	0.00174	3.66e-12	0.190275	0.0268492	1.37249e-12	0.0636972	0.0128223	6.77554e-07	0.121959	20	LncRNA
Ex	EA	BrainMetalnc.73146	8	BrainMetalnc.73146	42283254	rs2974302	8	42443119	G	C	0.494568	0.01061	0.00172	6.36e-10	0.266364	0.0266111	1.38448e-23	0.0398327	0.00758507	1.50902e-07	0.116134	20	LncRNA
Ex	IQ	BrainMetalnc.27551	16	BrainMetalnc.27551	28747048	rs2650492	16	28333411	A	G	0.31224	-0.0236674	0.00308813	1.802e-14	0.190163	0.0283092	1.85037e-11	-0.124458	0.0246373	4.38081e-07	0.130735	20	LncRNA
Ex	Neuroticism	ENSG00000264589	17	ENSG00000264589.4_9	43876755	rs62057151	17	43903842	T	C	0.220354	0.00278561	0.000247697	2.416e-29	0.210774	0.0326585	1.09013e-10	0.0132161	0.00236102	2.17309e-08	0.0496182	18	LncRNA
Ex	SCZ	BrainMetalnc.14650	11	BrainMetalnc.14650	124610986	rs12293670	11	124612932	G	A	0.336281	-0.0590045	0.0083	1.005e-12	0.283101	0.0275356	8.55936e-25	-0.208422	0.0356443	4.99641e-09	0.0321714	20	LncRNA
Ex	SCZ	BrainMetalnc.51151	3	BrainMetalnc.51151	52765112	rs1866268	3	52719398	A	C	0.420365	-0.0603046	0.0078	9.428e-15	-0.1629	0.0267969	1.2089e-09	0.370194	0.0774667	1.76391e-06	0.348183	20	LncRNA
Ex	SmokingInitiation	BrainMetalnc.10201	10	BrainMetalnc.10201	104936509	rs1926029	10	104855670	A	G	0.32322	0.0259058	0.00384053	1.54e-11	0.250535	0.0294799	1.92018e-17	0.103402	0.019571	1.26795e-07	0.0636353	20	LncRNA
In	AAM	BrainMetalnc.2933	1	BrainMetalnc.2933	72748098	rs11209943	1	72750500	A	G	0.386096	0.0170113	0.00216897	4.39809e-15	-0.285668	0.0242896	6.2046e-32	-0.0595491	0.00912605	6.79202e-11	0.26494	20	LncRNA
In	AAM	ENSG00000226688	10	ENSG00000226688.7_10	97492732	rs12261332	10	97850096	C	G	0.117429	0.0261354	0.00331789	3.35094e-15	-0.284377	0.0422855	1.75397e-11	-0.0919041	0.0179688	3.143e-07	0.573349	9	LncRNA
In	AAM	ENSG00000224086	22	ENSG00000224086.6_8	22292956	rs5995269	22	22289397	A	G	0.473821	-0.012385	0.0021267	5.76014e-09	0.169112	0.0189944	5.42433e-19	-0.0732356	0.015027	1.09584e-06	0.459912	20	LncRNA
In	AAM	BrainMetalnc.75656	9	BrainMetalnc.75656	11313412	rs1360827	9	11325637	A	G	0.478907	0.0131188	0.00213896	8.60918e-10	0.145546	0.0197483	1.70581e-13	0.0901354	0.0191193	2.42478e-06	0.272773	19	LncRNA
In	EA	BrainMetalnc.18501	12	BrainMetalnc.18501	123000116	rs7295397	12	123116209	C	T	0.263465	-0.00944	0.00193	1.04e-06	-0.547676	0.0311958	5.34117e-69	0.0172365	0.00365819	2.45603e-06	0.128982	20	LncRNA
In	EA	BrainMetalnc.27525	16	BrainMetalnc.27525	28383212	rs111384198	16	28617934	C	T	0.381184	-0.01574	0.00187	3.21e-17	0.169606	0.0288123	3.94268e-09	-0.0928035	0.0192382	1.40759e-06	0.0455852	20	LncRNA
In	EA	BrainMetalnc.31543	17	BrainMetalnc.31543	43611328	rs112431991	17	43758885	G	A	0.220238	-0.01747	0.00212	1.56e-16	-0.202964	0.0284032	8.9467e-13	0.0860746	0.0159435	6.71189e-08	0.469164	7	LncRNA
In	EA	ENSG00000285940	18	ENSG00000285940.2_4	35145243	rs11082013	18	35186448	G	T	0.340442	-0.01792	0.00179	1.41e-23	-0.35553	0.0299146	1.41864e-32	0.0504036	0.00658289	1.90699e-14	0.0267017	20	LncRNA
In	EA	BrainMetalnc.54700	4	BrainMetalnc.54700	2968648	rs2960310	4	2986671	G	C	0.354773	0.01224	0.00177	5.23e-12	-0.192157	0.0255016	4.88072e-14	-0.0636981	0.0125024	3.48968e-07	0.241098	20	LncRNA
In	EA	BrainMetalnc.59302	5	BrainMetalnc.59302	26868299	rs7722503	5	26863039	G	A	0.46365	-0.01096	0.0017	1.2e-10	0.256632	0.0278636	3.25257e-20	-0.0427071	0.0080859	1.28009e-07	0.225295	20	LncRNA
In	EA	ENSG00000271904	5	ENSG00000271904.1_10	87729708	rs10214175	5	87764347	A	T	0.24058	0.01529	0.00202	4.12e-14	-0.243016	0.0309979	4.51421e-15	-0.0629176	0.0115543	5.16863e-08	0.0529886	20	LncRNA
In	EA	BrainMetalnc.73146	8	BrainMetalnc.73146	42283254	rs2974337	8	42390873	T	C	0.495492	0.01035	0.00172	1.72e-09	-0.443036	0.0260201	5.20622e-65	-0.0233615	0.00411762	1.39868e-08	0.0278159	20	LncRNA
In	EA	BrainMetalnc.74552	8	BrainMetalnc.74552	110237333	rs4291240	8	110214517	C	T	0.401179	0.00911	0.00173	1.46e-07	-0.462851	0.0262597	1.55764e-69	-0.0196823	0.00390094	4.52255e-07	0.675669	20	LncRNA
In	Insomnia	BrainMetalnc.19976	13	BrainMetalnc.19976	53938307	rs7992723	13	53946802	T	C	0.347376	0.0314987	0.005367	5.355e-09	-0.20654	0.0235581	1.83089e-18	-0.152506	0.0312701	1.07676e-06	0.0254848	20	LncRNA
In	IQ	BrainMetalnc.30809	17	BrainMetalnc.30809	28797413	rs216476	17	28866646	T	C	0.482547	0.0141748	0.00273381	2.163e-07	0.421352	0.0278499	1.03651e-51	0.0336412	0.00685862	9.34509e-07	0.31298	20	LncRNA
In	MDD	BrainMetalnc.2933	1	BrainMetalnc.2933	72748098	rs11209943	1	72750500	A	G	0.386096	-0.0371	0.0044	4.045e-17	-0.285668	0.0242896	6.2046e-32	0.129871	0.0189519	7.24908e-12	0.175626	20	LncRNA
In	MDD	ENSG00000285940	18	ENSG00000285940.2_4	35145243	rs11082013	18	35186448	G	T	0.340442	0.0245	0.0045	5.83e-08	-0.35553	0.0299146	1.41864e-32	-0.0689111	0.013922	7.42928e-07	0.0537193	20	LncRNA
In	Neuroticism	BrainMetalnc.31543	17	BrainMetalnc.31543	43611328	rs112431991	17	43758885	G	A	0.220238	0.00283059	0.00025134	2.014e-29	-0.202964	0.0284032	8.9467e-13	-0.0139463	0.0023114	1.60233e-09	0.120269	7	LncRNA
In	Neuroticism	ENSG00000264589	17	ENSG00000264589.4_9	43876755	rs199529	17	44837217	C	A	0.221509	0.0026835	0.000299064	2.886e-19	-0.196331	0.0330818	2.94359e-09	-0.0136683	0.00276127	7.42188e-07	0.07417	18	LncRNA
In	Neuroticism	BrainMetalnc.42253	2	BrainMetalnc.42253	148817350	rs998884	2	148539852	G	A	0.403895	0.00232812	0.000309138	5.024e-14	0.201735	0.0289789	3.36829e-12	0.0115405	0.00225753	3.18783e-07	0.14443	20	LncRNA
In	Neuroticism	BrainMetalnc.52808	3	BrainMetalnc.52808	136446391	rs4408829	3	136404683	C	T	0.387078	-0.00233042	0.000348762	2.363e-11	-0.228638	0.0284602	9.46424e-16	0.0101926	0.00198407	2.78818e-07	0.290336	20	LncRNA
In	PD	ENSG00000264589	17	ENSG00000264589.4_9	43876755	rs199529	17	44837217	C	A	0.221509	-0.215	0.0235	6.119e-20	-0.196331	0.0330818	2.94359e-09	1.09509	0.219945	6.39373e-07	0.0966274	20	LncRNA
In	SCZ	BrainMetalnc.3572	1	BrainMetalnc.3572	97159591	rs6699932	1	97272456	G	A	0.179323	0.0538967	0.0097	3e-08	0.406802	0.035759	5.49302e-30	0.132489	0.0265366	5.95498e-07	0.569284	20	LncRNA
In	SCZ	BrainMetalnc.36474	19	BrainMetalnc.36474	19618760	rs2905427	19	19478023	G	T	0.370724	0.059504	0.008	1.279e-13	-0.170993	0.0268773	1.99142e-10	-0.347991	0.0719777	1.33346e-06	0.753452	20	LncRNA
In	SCZ	BrainMetalnc.52808	3	BrainMetalnc.52808	136446391	rs4408829	3	136404683	C	T	0.387078	-0.060504	0.0082	1.829e-13	-0.228638	0.0284602	9.46424e-16	0.264628	0.0486962	5.50219e-08	0.0242789	20	LncRNA
In	SCZ	ENSG00000249106	4	ENSG00000249106.1_6	176711457	rs9312586	4	176738321	G	A	0.0725266	0.0908004	0.014	8.137e-11	0.397653	0.057593	5.03686e-12	0.228341	0.0483033	2.27599e-06	0.479865	19	LncRNA
In	SmokingInitiation	BrainMetalnc.60706	5	BrainMetalnc.60706	87564695	rs3099438	5	87557207	A	G	0.467233	-0.0243162	0.0035659	9.3e-12	-0.164152	0.0250257	5.40532e-11	0.148132	0.0313354	2.27514e-06	0.0282827	20	LncRNA
Oli	EA	BrainMetalnc.43074	2	BrainMetalnc.43074	183033067	rs1430154	2	183401789	C	G	0.255374	0.01	0.00198	4.38e-07	0.377162	0.029759	8.2517e-37	0.0265138	0.00565121	2.70939e-06	0.048244	20	LncRNA
Oli	EA	BrainMetalnc.43073	2	BrainMetalnc.43073	183053837	rs1430154	2	183401789	C	G	0.255374	0.01	0.00198	4.38e-07	0.385973	0.0289005	1.10423e-40	0.0259085	0.00548445	2.31252e-06	0.115607	20	LncRNA
Oli	IQ	BrainMetalnc.56967	4	BrainMetalnc.56967	106317502	rs2636704	4	106315081	G	A	0.460529	-0.0164885	0.00275452	2.149e-09	0.189398	0.0202372	8.05923e-21	-0.0870577	0.017264	4.58922e-07	0.0250172	20	LncRNA
Ast	CP	ENSG00000197728	12	ENSG00000197728.11_10	56435134	rs10876864	12	56401085	G	A	0.405975	0.01679	0.00289	5.95e-09	0.184241	0.0161377	3.44719e-30	0.0911308	0.0176002	2.24472e-07	0.309061	20	PCG
Ast	CP	ENSG00000186868	17	ENSG00000186868.17_7	43971892	rs55686102	17	44202608	T	C	0.220469	-0.02288	0.00344	2.86e-11	0.394087	0.0347798	9.22531e-30	-0.0580583	0.0101218	9.69527e-09	0.106249	20	PCG
Ast	CP	ENSG00000001617	3	ENSG00000001617.12_7	50192477	rs3774751	3	50209053	T	G	0.474283	0.02612	0.00286	6.75e-20	0.156524	0.0278433	1.892e-08	0.166876	0.0348575	1.68991e-06	0.192129	20	PCG
Ex	CP	ENSG00000109919	11	ENSG00000109919.10_7	47638866	rs10838738	11	47663049	G	A	0.35356	-0.01865	0.00299	4.25e-10	0.397013	0.0285593	6.21531e-44	-0.0469758	0.00825462	1.26409e-08	0.463774	20	PCG
Ex	CP	ENSG00000278535	17	ENSG00000278535.5_7	34948308	rs35712149	17	34960336	T	G	0.403722	0.01835	0.0029	2.63e-10	-0.174874	0.0239736	2.99941e-13	-0.104933	0.0219533	1.75451e-06	0.173619	15	PCG
In	CP	ENSG00000181754	1	ENSG00000181754.7_6	110046799	rs14184	1	110047110	G	C	0.301953	0.02075	0.00312	2.88e-11	-0.25048	0.0314303	1.59476e-15	-0.0828409	0.0162237	3.28752e-07	0.0163829	20	PCG
In	CP	ENSG00000109919	11	ENSG00000109919.10_7	47638866	rs11605348	11	47606483	A	G	0.336627	-0.01884	0.00299	2.93e-10	-0.253155	0.0286445	9.76128e-19	0.0744208	0.0145054	2.88892e-07	0.90583	20	PCG
In	CP	ENSG00000197728	12	ENSG00000197728.11_10	56435134	rs7297175	12	56473808	T	C	0.414066	0.01613	0.00288	2.23e-08	-0.257664	0.0170683	1.71955e-51	-0.0626009	0.0119218	1.51309e-07	0.393132	20	PCG
In	CP	ENSG00000186868	17	ENSG00000186868.17_7	43971892	rs111676341	17	44183403	G	A	0.218736	-0.02319	0.00344	1.53e-11	-0.405616	0.0341952	1.8697e-32	0.0571723	0.00975487	4.60359e-09	0.149226	20	PCG
In	CP	ENSG00000183066	22	ENSG00000183066.14_6	42394728	rs133293	22	42382797	A	G	0.468562	-0.02038	0.00285	9.17e-13	0.151874	0.0235006	1.02935e-10	-0.13419	0.0279874	1.62955e-06	0.0645861	20	PCG
In	CP	ENSG00000100197	22	ENSG00000100197.23_9	42522500	rs2743459	22	42538704	T	G	0.436258	-0.02064	0.00286	5.64e-13	0.2127	0.0266677	1.5123e-15	-0.0970383	0.0181334	8.73007e-08	0.581818	20	PCG
Oli	CP	ENSG00000181754	1	ENSG00000181754.7_6	110046799	rs14184	1	110047110	G	C	0.301953	0.02075	0.00312	2.88e-11	0.232974	0.0317484	2.16603e-13	0.0890659	0.0180739	8.31251e-07	0.0324609	20	PCG
Oli	CP	ENSG00000197728	12	ENSG00000197728.11_10	56435134	rs10876864	12	56401085	G	A	0.405975	0.01679	0.00289	5.95e-09	0.174189	0.0170141	1.34101e-24	0.0963898	0.0190764	4.35334e-07	0.132033	20	PCG
Oli	CP	ENSG00000120088	17	ENSG00000120088.15_7	43861645	rs62062278	17	44093860	G	A	0.220238	-0.02303	0.00343	1.98e-11	-0.212877	0.0324852	5.6376e-11	0.108184	0.0230687	2.73646e-06	0.268901	20	PCG
Ex	CP	BrainMetalnc.27551	16	BrainMetalnc.27551	28747048	rs2650492	16	28333411	A	G	0.31224	-0.02041	0.00313	7.44e-11	0.190163	0.0283092	1.85037e-11	-0.107329	0.0229392	2.88504e-06	0.0559102	20	LncRNA
In	CP	BrainMetalnc.31543	17	BrainMetalnc.31543	43611328	rs112431991	17	43758885	G	A	0.220238	-0.02344	0.00345	1.04e-11	-0.202964	0.0284032	8.9467e-13	0.115489	0.023455	8.48634e-07	0.061621	7	LncRNA
In	CP	BrainMetalnc.52782	3	BrainMetalnc.52782	135850986	rs1393787	3	135854201	A	G	0.273058	-0.01701	0.00321	1.11e-07	-0.364309	0.0333865	1.01128e-27	0.0466911	0.00979522	1.87246e-06	0.076086	20	LncRNA
In	CP	BrainMetalnc.56967	4	BrainMetalnc.56967	106317502	rs2726506	4	106308718	G	A	0.460703	-0.0167	0.00286	5.05e-09	-0.186324	0.0207723	2.96933e-19	0.0896288	0.0183154	9.8997e-07	0.0108874	20	LncRNA
Oli	CP	BrainMetalnc.56967	4	BrainMetalnc.56967	106317502	rs2636704	4	106315081	G	A	0.460529	-0.01712	0.00286	2.09e-09	0.189398	0.0202372	8.05923e-21	-0.0903918	0.0179251	4.58902e-07	0.0922637	20	LncRNA
