# Supplementary material
Source: Research Square preprint supplement (doi:10.21203/rs.3.rs-8945185/v1)
Supplement: Supplementary file 4 [file c743fb5de5bf325cf1aa59f3.xlsx]

## Sheet: Sheet1
Supplementary Table 2. Significant ieQTLs identified across four brain cell types (FDR < 0.05).
CellType	phenotype_id	variant_id	start_distance	end_distance	af	ma_samples	ma_count	pval_g	b_g	b_g_se	pval_i	b_i	b_i_se	pval_gi	b_gi	b_gi_se	tests_emt	pval_emt	pval_adj_bh	eGeneType	SourceGene	Direction
Ast	BrainMetalnc.29553	rs1075485	4709	-530	0.300246	1236	1467	2.68131e-13	-0.223592	0.0304187	0.00123253	0.0869732	0.0268848	7.46197e-08	-0.163744	0.0303441	1236	9.223e-05	0.00226022	LncRNA		Positive
Ast	ENSG00000186594	rs1075485	4461	-1220	0.300246	1236	1467	6.59728e-14	-0.229367	0.0304208	0.00243088	0.0816007	0.0268867	3.84182e-07	-0.154481	0.0303463	1236	0.000474848	0.00938068	LncRNA	MIR22HG	Positive
Ast	ENSG00000167711	rs8070192	-7939	-20368	0.216946	948	1060	2.59474e-104	0.717957	0.0315159	0.00307499	-0.0677024	0.0228485	1.79232e-06	0.152534	0.0318627	1264	0.00226549	0.0325185	PCG	SERPINF2	Positive
Ast	BrainMetalnc.29573	rs903164	-1492	-2756	0.408923	1602	1998	1.01922e-215	-0.830546	0.0238716	2.18523e-11	0.171523	0.0255067	1.63943e-15	-0.190648	0.0237748	1248	2.04601e-12	3.60098e-10	LncRNA	DPH1	Positive
Ast	ENSG00000161905	rs9915105	34528	23153	0.248465	1060	1214	1.59173e-142	0.786409	0.0289109	0.0118012	-0.0568862	0.0225745	4.01761e-06	0.133493	0.0288883	920	0.0036962	0.0444462	PCG	ALOX15	Positive
Ast	ENSG00000108556	rs8075365	23496	18460	0.123618	565	604	7.6367e-55	0.656997	0.0410732	0.017882	-0.0518335	0.0218739	3.33448e-06	0.188783	0.0405125	908	0.00302771	0.0401482	PCG	CHRNE	Positive
Ast	ENSG00000167840	rs143649705	145180	127605	0.0613999	286	300	9.5263e-70	0.997712	0.0547143	0.00472329	-0.056704	0.0200514	1.82832e-08	0.316213	0.0560025	963	1.76068e-05	0.000541058	PCG	ZNF232	Positive
Ast	ENSG00000286190	rs9894772	9299	8324	0.269955	1155	1319	4.22502e-11	0.213674	0.032247	0.000107613	-0.103523	0.0266874	3.25894e-08	0.170069	0.0306715	1007	3.28175e-05	0.000907638	PCG	AC055839.2	Positive
Ast	ENSG00000132535	rs1875673	18000	-14654	0.346705	1392	1694	1.51412e-17	-0.250559	0.0291657	1.48805e-06	0.138125	0.0286283	9.36362e-12	-0.200267	0.0292393	931	8.71753e-09	6.25079e-07	PCG	DLG4	Positive
Ast	ENSG00000170291	rs2521985	-33616	-41436	0.35612	1418	1740	1.6943e-12	0.20585	0.0290155	3.71289e-07	-0.147689	0.028975	8.71582e-12	0.199325	0.0290573	899	7.83552e-09	5.83445e-07	PCG	ELP5	Positive
Ast	BrainMetalnc.30013	rs12948349	6041	-562	0.302702	1243	1479	9.38491e-16	-0.245086	0.0302989	0.000691906	0.0880385	0.0259156	1.7073e-06	-0.144843	0.0301942	842	0.00143754	0.0235855	LncRNA	MYH10	Positive
Ast	BrainMetalnc.30168	rs10153250	1668	-18727	0.160254	720	783	1.85048e-19	0.34725	0.0381655	0.00194438	-0.0725153	0.0233772	1.81144e-09	0.233275	0.0386418	1037	1.87846e-06	7.44746e-05	LncRNA	ARHGAP44	Positive
Ast	ENSG00000173065	rs9902472	-3581	-102612	0.242734	1038	1186	0.000618843	-0.112968	0.0329576	0.000312316	0.0932342	0.0258263	2.25208e-08	-0.188062	0.0335228	337	7.58952e-06	0.00026238	PCG	FAM222B	Positive
Ast	BrainMetalnc.30753	rs4795472	-40079	-45213	0.120753	559	590	0.00110841	0.144137	0.0441412	0.0191867	-0.0535004	0.0228298	4.21223e-06	0.201387	0.0436744	285	0.00120048	0.0198644	LncRNA	PHF12	Positive
Ast	BrainMetalnc.30809	rs9896343	33839	-15249	0.485264	1797	2371	3.28908e-19	-0.25214	0.027911	2.77334e-11	0.229363	0.0342886	7.62453e-15	-0.215346	0.0275277	241	1.83751e-12	3.55742e-10	LncRNA	GOSR1	Positive
Ast	ENSG00000131242	rs11657064	24858	-121679	0.289398	1196	1414	2.00562e-12	-0.215564	0.0304871	0.0003891	0.0923928	0.0260092	2.55063e-13	-0.225133	0.0306	475	1.21155e-10	1.17278e-08	PCG	RAB11FIP4	Positive
Ast	BrainMetalnc.30900	rs7225208	-2187	-5346	0.499795	1824	2442	1.7863e-11	-0.18932	0.0280289	3.64294e-06	0.159855	0.0344407	9.60646e-10	-0.171159	0.0278761	658	6.32105e-07	2.98477e-05	LncRNA	MYO1D	Positive
Ast	ENSG00000006042	rs2640836	-267335	-284531	0.119525	544	584	6.07947e-22	-0.415463	0.0427369	0.0479467	0.0440809	0.0222762	6.18466e-06	-0.189527	0.0418388	679	0.00419938	0.0492728	PCG	TMEM98	Positive
Ast	ENSG00000226049	rs28645912	7782	4591	0.234548	1013	1146	1.27174e-63	-0.550077	0.0317195	0.000114668	0.0934022	0.0241753	1.00856e-08	-0.186238	0.0323936	882	8.89546e-06	0.000302134	Other	-	Positive
Ast	ENSG00000278311	rs2306593	-34215	-79732	0.483422	1801	2362	2.70708e-33	0.340931	0.0279358	0.000543794	-0.114969	0.0332013	4.17377e-06	0.128796	0.0279201	563	0.00234983	0.0327905	PCG	GGNBP2	Positive
Ast	ENSG00000276023	rs79356259	26817	3211	0.106017	496	518	2.9603e-20	-0.428938	0.046111	0.0166968	0.0525859	0.0219568	3.30187e-08	-0.244967	0.0441978	737	2.43348e-05	0.00071382	PCG	DUSP14	Positive
Ast	ENSG00000286443	rs7221482	-20103	-25069	0.414449	1616	2025	7.85411e-63	0.474568	0.0275526	7.72725e-05	-0.117576	0.0296951	6.28483e-07	0.136897	0.0274043	558	0.000350693	0.00722279	LncRNA	AC091178.2	Positive
Ast	ENSG00000131748	rs11078921	115524	88413	0.324601	1340	1586	0.014635	-0.0750922	0.0307373	0.0022549	0.0882273	0.0288545	3.65669e-06	-0.143667	0.0309583	500	0.00182834	0.0280926	PCG	STARD3	Positive
Ast	BrainMetalnc.31214	rs7211770	17036	10780	0.244167	1041	1193	5.43115e-21	0.306625	0.0323196	0.00122179	-0.0805972	0.0248945	1.42418e-07	0.172207	0.0326298	446	6.35183e-05	0.00163962	LncRNA		Positive
Ast	ENSG00000108774	rs9902341	1526	-28494	0.172124	767	841	2.49532e-44	0.519467	0.0364487	0.226447	-0.0281905	0.0233005	8.00939e-06	0.15936	0.0356149	363	0.00290741	0.0390885	PCG	RAB5C	Positive
Ast	ENSG00000279602	rs565043	256199	254879	0.127507	584	623	5.23749e-09	-0.249153	0.0425138	0.0545485	0.0445113	0.0231422	1.11655e-05	-0.189906	0.0431367	360	0.00401958	0.0474507	Other	-	Positive
Ast	ENSG00000161653	rs72822645	34345	29899	0.203029	896	992	7.55104e-63	-0.577955	0.0335501	0.00013069	0.0907297	0.0236812	1.18678e-09	-0.203037	0.0332533	413	4.90139e-07	2.49713e-05	PCG	NAGS	Positive
Ast	BrainMetalnc.31522	rs1989803	8456	5177	0.375972	1480	1837	3.70418e-11	0.191904	0.0288755	0.000216059	-0.11385	0.0307285	1.44992e-06	0.137552	0.0284787	454	0.000658263	0.0123728	LncRNA	NMT1	Positive
Ast	ENSG00000264070	rs2696557	683981	682923	0.207941	918	1016	9.3259e-176	0.917318	0.0298323	2.64423e-11	-0.14141	0.0211176	2.38815e-25	0.318509	0.0302732	382	9.12272e-23	8.83079e-20	Other	-	Positive
Ast	ENSG00000280022	rs2668622	682144	681396	0.207941	917	1016	0	1.19979	0.0257098	1.53232e-08	-0.103221	0.0181819	1.05433e-18	0.231823	0.0260442	377	3.97483e-16	1.53905e-13	Other	-	Positive
Ast	ENSG00000263503	rs2668622	673896	672425	0.207941	917	1016	0	1.27052	0.0244428	0.000496197	-0.0602845	0.0172859	2.16399e-12	0.174807	0.0247607	377	8.15824e-10	7.17925e-08	Other	-	Positive
Ast	ENSG00000204650	rs1991556	385708	350880	0.211216	919	1032	0	1.17598	0.0253641	0.000104949	-0.0710263	0.018281	5.53007e-10	0.15857	0.0254589	374	2.06824e-07	1.11226e-05	Other	-	Positive
Ast	ENSG00000262539	rs199528	506219	505164	0.199754	881	976	0	1.29616	0.0244736	0.00571947	-0.0472039	0.0170664	3.52655e-09	0.146137	0.024657	336	1.18492e-06	5.09779e-05	Other	-	Positive
Ast	ENSG00000108379	rs9904865	68391	-2161	0.342407	1387	1673	0	1.02162	0.0218922	0.0132832	-0.0515578	0.0208071	1.06273e-07	0.11558	0.021678	334	3.54951e-05	0.000967866	PCG	WNT3	Positive
Ast	BrainMetalnc.31579	rs12452064	-182288	-190829	0.457634	1723	2236	0.0254937	-0.0639008	0.0285883	0.00029324	0.119243	0.0328815	6.37482e-06	-0.130656	0.028884	328	0.00209094	0.0311389	LncRNA	RPRML	Positive
Ast	ENSG00000136457	rs2898945	12059	7649	0.425911	1647	2081	1.97867e-177	-0.76019	0.0245837	4.05872e-09	0.160785	0.0272363	1.30615e-09	-0.15233	0.0250122	802	1.04753e-06	4.60914e-05	PCG	CHAD	Positive
Ast	ENSG00000250107	rs8065903	-4110	-10011	0.2544	1083	1243	1.66008e-09	0.196446	0.0324643	0.00288497	-0.0773888	0.0259454	4.12152e-06	0.151281	0.0327755	762	0.0031406	0.0403535	LncRNA	CACNA1G-AS1	Positive
Ast	ENSG00000141198	rs66898273	17208	-42899	0.29165	1203	1425	1.00998e-05	-0.13539	0.0306012	4.60062e-06	0.124021	0.0270047	2.58767e-13	-0.22746	0.0309245	520	1.34559e-10	1.2405e-08	PCG	TOM1L1	Positive
Ast	ENSG00000153982	rs2017276	-37601	-93104	0.188498	829	921	0.0184051	-0.0846997	0.0359057	0.000394459	0.0856854	0.0241456	5.94695e-14	-0.270276	0.0357809	251	1.49268e-11	2.06417e-09	PCG	GDPD1	Positive
Ast	BrainMetalnc.32002	rs12948003	31447	-98544	0.144085	660	704	0.0001339	0.156314	0.0408635	0.0011001	-0.0761302	0.0232993	4.85488e-08	0.232636	0.0424999	201	9.75831e-06	0.000325726	LncRNA		Positive
Ast	ENSG00000265313	rs9902712	11306	-93552	0.141834	649	693	4.10703e-16	0.331836	0.0405087	0.000243493	-0.0842449	0.0229272	8.69436e-11	0.274879	0.0421798	197	1.71279e-08	1.18427e-06	LncRNA	LINC01476	Positive
Ast	ENSG00000224383	rs12602435	8494	5273	0.364102	1444	1779	1.58575e-05	-0.126516	0.0292514	0.000884898	0.0970591	0.0291566	2.12275e-06	-0.137239	0.0288754	268	0.000568896	0.0111251	PCG	PRR29	Positive
Ast	ENSG00000075429	rs4790904	-52081	-111714	0.218379	959	1067	7.47213e-08	-0.187248	0.0347014	0.00691415	0.0683953	0.0253012	4.5843e-06	-0.161875	0.0352414	733	0.00336029	0.0425198	PCG	CACNG5	Positive
Ast	ENSG00000196704	rs57637458	58879	6648	0.222063	949	1085	1.88167e-33	0.396875	0.0324364	5.42733e-05	-0.0986711	0.0244019	9.84187e-15	0.247146	0.0317266	679	6.68263e-12	1.07813e-09	PCG	AMZ2	Positive
Ast	ENSG00000129673	rs12450964	35114	18348	0.361032	1414	1764	3.86587e-39	0.371354	0.0278744	0.000145557	-0.106307	0.027942	2.56917e-06	0.131557	0.0279094	851	0.00218636	0.0318255	PCG	AANAT	Positive
Ast	ENSG00000267432	rs894976	4545	-9767	0.292878	1231	1431	1.23632e-104	0.65379	0.0286496	5.77161e-06	-0.113245	0.0249184	6.44003e-10	0.179375	0.028912	1496	9.63428e-07	4.33767e-05	LncRNA	DNAH17-AS1	Positive
Ast	ENSG00000182446	rs4073997	2489	-77736	0.286328	1196	1399	3.97274e-36	0.388711	0.030471	0.00017521	-0.0968775	0.0257782	3.39451e-06	0.143684	0.0308589	906	0.00307543	0.0401526	PCG	NPLOC4	Positive
Ast	ENSG00000214087	rs7503637	1298	-1312	0.17458	781	853	3.0889e-233	-1.10568	0.0302826	8.53268e-05	0.077152	0.0196039	8.00169e-08	-0.16556	0.0307531	920	7.36155e-05	0.0018509	PCG	ARL16	Positive
Ast	ENSG00000141562	rs7211620	3408	-28921	0.355096	1418	1735	1.65685e-79	-0.538181	0.027467	0.000902422	0.0897386	0.0270021	2.6529e-06	-0.132195	0.0280839	659	0.00174826	0.0272954	PCG	NARF	Positive
Ast	ENSG00000167363	rs8080925	35992	20411	0.382521	1520	1869	9.83338e-09	-0.168618	0.0293069	5.49837e-05	0.120489	0.0298202	3.93786e-08	-0.159381	0.0289194	543	2.13826e-05	0.000636873	PCG	FN3K	Positive
Ast	BrainMetalnc.24078	rs28583941	50545	-20733	0.295129	1220	1442	6.59319e-11	0.201315	0.0306932	0.000374644	-0.0960116	0.026952	3.083e-07	0.152642	0.0297397	496	0.000152917	0.00367	LncRNA	OTUD7A	Positive
Ast	ENSG00000184984	rs544114	27622	-71339	0.383954	1495	1876	3.50666e-208	0.807175	0.0237099	0.000121392	-0.0950879	0.0247012	1.91754e-08	0.134258	0.0238126	948	1.81783e-05	0.000717749	PCG	CHRM5	Positive
Ast	ENSG00000140323	rs56221586	-18	-20420	0.164961	740	806	5.77654e-91	0.745158	0.035304	5.06863e-05	-0.0888425	0.0218841	5.07548e-13	0.251238	0.0345923	471	2.39055e-10	4.87672e-08	PCG	DISP2	Positive
Ast	ENSG00000138593	rs7164109	418883	360912	0.460499	1719	2250	0.000238931	0.103798	0.0282114	2.57058e-06	-0.150451	0.0319185	1.37482e-05	0.119605	0.0274529	323	0.00444068	0.0489675	PCG	SECISBP2L	Positive
Ast	BrainMetalnc.24765	rs76134575	17253	14150	0.0861645	397	421	2.52223e-09	0.297159	0.0496722	0.00239635	-0.0664936	0.0218778	9.25117e-08	0.25038	0.0467384	485	4.48682e-05	0.00140137	LncRNA	GNB5	Positive
Ast	BrainMetalnc.24768	rs10220890	33617	18548	0.130782	601	639	1.1429e-25	0.441339	0.0416613	0.0197567	-0.0525946	0.0225488	2.71488e-06	0.19267	0.0409728	493	0.00133843	0.020478	LncRNA	GNB5	Positive
Ast	BrainMetalnc.25045	rs2229749	-39884	-77896	0.124233	556	607	3.80047e-47	-0.593914	0.0403041	0.00168475	0.0684021	0.0217542	4.37437e-09	-0.239504	0.0406575	520	2.27467e-06	0.000136679	LncRNA	HERC1	Positive
Ast	BrainMetalnc.25203	rs67264405	-1934	-13902	0.14429	654	705	1.8715e-12	-0.283909	0.0400977	0.00948302	0.0594816	0.0229111	1.30504e-07	-0.218083	0.0411961	624	8.14343e-05	0.00221501	LncRNA	MAP2K5	Positive
Ast	ENSG00000140374	rs7171795	101487	5368	0.23598	999	1153	2.62585e-05	-0.136148	0.0323257	2.90213e-11	0.165623	0.0247849	5.66984e-21	-0.304613	0.0321233	308	1.74631e-18	1.06874e-15	PCG	ETFA	Positive
Ast	ENSG00000117906	rs11634019	-589399	-612054	0.29165	1200	1425	5.18134e-08	-0.166736	0.0305259	2.28994e-05	0.113262	0.0266952	1.37655e-10	-0.197744	0.0306754	370	5.09322e-08	6.92678e-06	PCG	RCN2	Positive
Ast	BrainMetalnc.25585	rs11636412	2285	-1306	0.323782	1343	1582	1.3485e-06	-0.149312	0.0308205	4.15177e-05	0.116662	0.02841	3.08802e-08	-0.172528	0.0310615	463	1.42975e-05	0.000676759	LncRNA	HMG20A	Positive
Ast	ENSG00000260776	rs7175950	29794	17165	0.482194	1781	2356	0	1.05975	0.018646	0.000373749	-0.0791108	0.0222038	8.41849e-08	0.100722	0.0187415	544	4.57966e-05	0.00140137	Other	-	Positive
Ast	BrainMetalnc.25624	rs7182497	2401	-7652	0.437372	1655	2137	2.77028e-32	0.330328	0.0275233	0.000165665	-0.117231	0.0310775	1.30794e-08	0.156479	0.0274307	637	8.33159e-06	0.000424911	LncRNA	ACSBG1	Positive
Ast	ENSG00000041357	rs4887062	5054	-6958	0.424273	1647	2073	3.15005e-09	-0.171768	0.0288901	1.12842e-05	0.141247	0.0321006	2.33536e-09	-0.175554	0.0292829	723	1.68847e-06	0.000114816	PCG	PSMA4	Positive
Ast	BrainMetalnc.25645	rs62013193	11249	-2585	0.131396	607	642	0.000145218	-0.162108	0.0426026	0.020684	0.0526138	0.0227253	7.10861e-07	-0.214258	0.0430981	741	0.000526748	0.010234	LncRNA		Positive
Ast	BrainMetalnc.25685	rs2733092	29406	22253	0.458657	1727	2241	1.56715e-98	-0.576486	0.0261253	1.34992e-05	0.136609	0.0313268	1.37584e-07	-0.139332	0.0263686	843	0.000115983	0.00295757	LncRNA	ST20-MTHFS	Positive
Ast	ENSG00000136379	rs7177091	73425	-2512	0.129554	594	633	5.37442e-17	-0.353687	0.0419074	4.79563e-05	0.0916155	0.0224951	5.71845e-08	-0.229055	0.0420718	770	4.40321e-05	0.00140137	PCG	ABHD17C	Positive
Ast	BrainMetalnc.25755	rs1013563562	-262739	-264221	0.244167	1026	1193	5.07166e-09	0.188844	0.0321934	0.000708249	-0.086069	0.0253838	1.92717e-06	0.154907	0.0324582	373	0.000718834	0.0127515	LncRNA		Positive
Ast	ENSG00000176700	rs1484317891	-535180	-550379	0.293901	1233	1436	0.046016	-0.0628886	0.0315031	0.000440062	0.0960584	0.0272922	1.70154e-06	-0.14737	0.0307165	562	0.000956267	0.0158172	Other	-	Positive
Ast	ENSG00000197696	rs11637728	5032	1598	0.283054	1181	1383	2.81845e-06	-0.146856	0.0312816	0.000620308	0.090617	0.0264418	6.91366e-07	-0.157847	0.0317163	547	0.000378177	0.00784558	PCG	NMB	Positive
Ast	BrainMetalnc.25852	rs185972	-76049	-106687	0.280188	1185	1369	8.32584e-46	-0.44331	0.0305578	7.9574e-06	0.11612	0.0259431	1.38665e-12	-0.215645	0.0302757	619	8.58338e-10	1.31326e-07	LncRNA	PDE8A	Positive
Ast	BrainMetalnc.25854	rs2342974	-18424	-19598	0.304953	1272	1490	1.7161e-25	-0.321953	0.0305062	0.00038869	0.0969876	0.0273005	2.60842e-08	-0.168946	0.0302545	607	1.58331e-05	0.000692133	LncRNA	PDE8A	Positive
Ast	BrainMetalnc.26045	rs17180057	5082	-16424	0.266066	1132	1300	5.48286e-39	0.415196	0.0312309	0.000126076	-0.0994633	0.0259007	8.93371e-09	0.17771	0.0307991	866	7.7366e-06	0.000411721	LncRNA	CRTC3	Positive
Ast	BrainMetalnc.26076	rs10852166	174182	-26228	0.311298	1290	1521	8.22418e-20	-0.279629	0.0304302	0.00169689	0.0851754	0.0271068	3.30717e-06	-0.14029	0.0300951	1213	0.0040116	0.0456729	LncRNA	SLCO3A1	Positive
Ast	BrainMetalnc.26103	rs1439620	-1749	-5580	0.313549	1290	1532	8.94871e-85	-0.577931	0.0284706	0.000224501	0.0935375	0.0253129	4.95997e-10	-0.18029	0.028866	1360	6.74556e-07	4.8568e-05	LncRNA	AC013394.1	Positive
Ast	ENSG00000182175	rs11858429	265564	211634	0.179902	789	879	6.7641e-18	0.312601	0.03599	0.0588931	-0.044069	0.0233185	1.55408e-06	0.179288	0.0372273	1369	0.00212754	0.0286166	PCG	RGMA	Positive
Ast	BrainMetalnc.26320	rs12442203	37338	-21666	0.396848	1549	1939	4.30993e-10	-0.179845	0.0286925	2.31431e-06	0.145532	0.0307343	1.91997e-09	-0.176641	0.0293067	1174	2.25405e-06	0.000136679	LncRNA	ADAMTS17	Positive
Ast	BrainMetalnc.26396	rs4965944	-17688	-25841	0.243348	1046	1189	6.86042e-46	0.46385	0.0319419	0.002207	-0.0762641	0.0248894	6.55278e-06	0.144515	0.0319894	615	0.00402996	0.0456729	LncRNA		Positive
Ast	ENSG00000111671	rs5443	-25238	-43647	0.311093	1280	1520	4.5559e-240	0.915341	0.0246217	0.00325244	-0.0649655	0.0220541	5.35114e-07	0.127562	0.0253768	748	0.000400265	0.00807492	PCG	SPSB2	Positive
Ast	ENSG00000139197	rs1403518825	28037	-1852	0.484241	1786	2366	9.76829e-226	-0.820406	0.0229298	2.97705e-08	0.154118	0.0277147	1.72177e-12	-0.159864	0.0225408	733	1.26206e-09	1.17119e-07	PCG	PEX5	Positive
Ast	BrainMetalnc.15185	rs75005299	-38383	-162113	0.198731	878	971	8.46086e-09	0.204163	0.0353269	6.4851e-08	-0.132437	0.0244273	7.72496e-16	0.286085	0.0352614	793	6.12589e-13	1.03361e-10	LncRNA	ACSM4	Positive
Ast	ENSG00000166532	rs61919240	-2333	-103737	0.308637	1276	1508	5.68223e-06	0.139755	0.0307293	0.0303994	-0.0612434	0.0282735	1.14777e-06	0.153731	0.0315231	707	0.000811475	0.0138368	PCG	RIMKLB	Positive
Ast	ENSG00000256667	rs200301763	-11933	-23539	0.472165	1763	2307	5.4878e-10	0.176547	0.0283396	2.57231e-05	-0.141866	0.0336458	4.91248e-07	0.141321	0.0280215	609	0.00029917	0.00653246	Other	-	Positive
Ast	BrainMetalnc.15331	rs3983545	-7362	-16345	0.473393	1768	2313	2.34528e-08	0.159232	0.0284197	1.39072e-05	-0.147025	0.0337663	3.75859e-07	0.143192	0.0281056	608	0.000228522	0.00536883	LncRNA		Positive
Ast	ENSG00000111215	rs2416549	327356	323730	0.408923	1582	1998	3.56745e-25	0.295449	0.0281875	2.00505e-05	-0.131227	0.0307126	7.46985e-07	0.141142	0.0284463	653	0.000487781	0.00943043	PCG	PRR4	Positive
Ast	BrainMetalnc.15341	rs11054120	5847	-1840	0.264838	1130	1294	5.61335e-06	0.1469	0.032282	8.79318e-07	-0.131139	0.0266024	3.32175e-11	0.213606	0.0320621	687	2.28204e-08	1.69419e-06	LncRNA	TAS2R14	Positive
Ast	BrainMetalnc.15541	rs10841322	-22110	-74571	0.280188	1177	1369	9.1116e-13	-0.22517	0.0313539	0.000257573	0.0979773	0.0267698	2.94632e-08	-0.170903	0.0307232	841	2.47786e-05	0.000757281	LncRNA		Positive
Ast	ENSG00000111728	rs3819874	222053	-151215	0.218174	942	1066	3.19446e-54	0.510942	0.0321407	7.45181e-12	-0.162427	0.0236	4.30222e-23	0.331641	0.033171	634	2.72761e-20	1.01249e-17	PCG	ST8SIA1	Positive
Ast	ENSG00000211455	rs61923164	-83206	-165197	0.0900532	424	440	0.0153613	0.121854	0.0502398	0.231249	-0.0264234	0.0220664	1.06275e-06	0.245803	0.050245	709	0.000753489	0.0131932	PCG	STK38L	Positive
Ast	BrainMetalnc.15829	rs2892638	-63912	-70057	0.408719	1582	1997	5.63051e-12	-0.19666	0.0284066	4.59791e-07	0.14911	0.0294913	4.13837e-12	-0.197146	0.0282955	755	3.12447e-09	2.52131e-07	LncRNA	DENND5B	Positive
Ast	ENSG00000057294	rs10844343	-14808	-120830	0.276709	1160	1352	0.0119284	0.0795172	0.0316028	0.00046114	-0.0938257	0.0267528	2.70467e-08	0.172879	0.0309941	619	1.67419e-05	0.00054514	PCG	PKP2	Positive
Ast	ENSG00000111371	rs9795554	7907	-79047	0.26402	1119	1290	0.00251752	-0.0975813	0.032265	0.0263253	0.057895	0.0260468	2.72623e-06	-0.153589	0.032668	406	0.00110685	0.0178636	PCG	SLC38A1	Positive
Ast	ENSG00000139211	rs7313709	481765	477513	0.314982	1291	1539	6.63257e-05	-0.121306	0.0303567	0.000145055	0.105769	0.0277944	1.12968e-08	-0.177253	0.0309356	633	7.1509e-06	0.000254907	PCG	AMIGO2	Positive
Ast	ENSG00000167528	rs10875765	-147331	-161565	0.243348	1030	1189	7.92356e-07	-0.160983	0.0325211	0.00028583	0.094179	0.0259226	3.57941e-07	-0.158844	0.0311205	541	0.000193646	0.00460778	PCG	ZNF641	Positive
Ast	ENSG00000139620	rs12368244	-11435	-40462	0.248056	1078	1212	1.63474e-11	0.225145	0.0332684	9.07519e-05	-0.101834	0.0259738	2.80196e-07	0.173043	0.0335956	471	0.000131973	0.00340196	PCG	KANSL2	Positive
Ast	ENSG00000139624	rs10783340	36056	-2188	0.338314	1355	1653	1.48895e-66	-0.492646	0.0277179	2.55889e-06	0.127731	0.027093	6.49124e-13	-0.197948	0.0273835	312	2.02527e-10	2.50593e-08	PCG	CERS5	Positive
Ast	BrainMetalnc.16480	rs1870217	171266	165893	0.376177	1481	1838	0.00670318	0.0789794	0.0291054	0.000105914	-0.120464	0.0310233	2.40701e-06	0.140435	0.0297084	695	0.00167287	0.0242567	LncRNA	NR4A1	Positive
Ast	ENSG00000135390	rs3892761	43935	-747	0.298199	1233	1457	4.21678e-131	0.710242	0.0273947	2.68768e-06	-0.114754	0.0243926	1.2018e-07	0.147723	0.027825	603	7.24685e-05	0.00200749	PCG	ATP5MC2	Positive
Ast	ENSG00000197728	rs10876864	-34050	-37396	0.408719	1573	1997	0	1.14803	0.0163912	5.34862e-17	-0.151396	0.0179372	3.44717e-30	0.184241	0.0159209	316	1.08931e-27	1.01088e-24	PCG	RPS26	Positive
Ast	BrainMetalnc.16728	rs11609986	-59529	-206435	0.464388	1760	2269	1.62178e-05	-0.12481	0.0288904	0.000119905	0.127932	0.0332071	2.11249e-06	-0.136465	0.0287066	342	0.000722473	0.0127706	LncRNA	R3HDM2	Positive
Ast	BrainMetalnc.16808	rs9943716	104934	-130537	0.19607	863	958	3.55595e-08	-0.196557	0.0355478	0.00302502	0.0711052	0.023956	1.62989e-08	-0.201241	0.0355148	356	5.80243e-06	0.000215386	LncRNA		Positive
Ast	ENSG00000183735	rs7956653	53486	5352	0.455997	1728	2228	7.66563e-07	-0.142111	0.028671	0.00012567	0.125614	0.0327035	3.0291e-06	-0.132842	0.0283865	415	0.00125708	0.0194428	PCG	TBK1	Positive
Ast	BrainMetalnc.17032	rs998022	12484	6406	0.490585	1812	2397	4.02429e-19	-0.25207	0.0279739	2.19384e-09	0.194206	0.0323386	7.02867e-12	-0.190318	0.0276185	661	4.64595e-09	3.59287e-07	LncRNA	CPSF6	Positive
Ast	ENSG00000111615	rs3809118	-12387	-33133	0.255014	1072	1246	7.78181e-177	0.844567	0.0273668	0.00367144	-0.0650761	0.022379	1.33528e-07	0.142417	0.0269243	570	7.61112e-05	0.00204728	PCG	KRR1	Positive
Ast	ENSG00000177425	rs12827748	119819	3834	0.323782	1310	1582	1.11878e-06	0.145785	0.0298626	0.000437311	-0.0988498	0.0280719	2.51842e-07	0.155475	0.030067	312	7.85748e-05	0.00208335	PCG	PAWR	Positive
Ast	ENSG00000133641	rs147123313	-19796	-35824	0.0837086	387	409	1.79345e-05	0.217782	0.0506741	0.0581775	-0.0410839	0.0216773	2.63879e-06	0.239511	0.0508707	247	0.000651781	0.0119697	PCG	C12orf29	Positive
Ast	BrainMetalnc.17960	rs4964264	706	-515	0.182767	821	893	2.70293e-08	0.206931	0.0370984	0.00144941	-0.0772935	0.0242431	1.33512e-07	0.200328	0.0378723	554	7.39656e-05	0.00201883	LncRNA	SART3	Positive
Ast	ENSG00000089250	rs4767540	231060	-12968	0.449243	1691	2195	2.21213e-91	-0.550774	0.0260284	0.000130246	0.113171	0.0295322	1.64996e-09	-0.157093	0.0259567	999	1.64832e-06	7.64818e-05	PCG	NOS1	Positive
Ast	ENSG00000158023	rs12809676	85883	548	0.473189	1751	2312	1.29762e-09	-0.169301	0.027794	8.1841e-10	0.20368	0.033034	6.41414e-15	-0.217454	0.0277182	434	2.78374e-12	4.30551e-10	PCG	CFAP251	Positive
Ast	BrainMetalnc.18501	rs7314638	-16657	-56992	0.246009	1053	1202	6.55248e-35	0.393495	0.0314245	1.24353e-12	-0.176515	0.0247288	4.43576e-27	0.355126	0.0325583	328	1.45493e-24	6.75087e-22	LncRNA	RSRC2	Positive
Ast	ENSG00000081760	rs10846829	45078	-32804	0.340156	1392	1662	1.1943e-22	0.294998	0.0298214	4.93467e-05	-0.116384	0.0286238	7.99486e-07	0.144713	0.0292447	1064	0.000850653	0.0143528	PCG	AACS	Positive
Ast	ENSG00000103148	rs7199157	20581	-32710	0.486697	1781	2378	2.27997e-72	0.489198	0.026291	0.000376059	-0.114434	0.0321325	2.71438e-06	0.126928	0.0269921	680	0.00184578	0.0365189	PCG	NPRL3	Positive
Ast	ENSG00000103202	rs7196963	48813	44784	0.318461	1310	1556	4.87438e-06	-0.139971	0.0305588	0.000421254	0.0984576	0.0278817	2.64879e-06	-0.141478	0.030054	862	0.00228326	0.0415064	PCG	NME4	Positive
Ast	ENSG00000103245	rs2071951	3244	-8325	0.19955	863	975	1.46615e-100	0.711594	0.0318833	0.000637647	-0.0759646	0.022215	9.06908e-08	0.172982	0.0322685	1023	9.27766e-05	0.00321977	PCG	CIAO3	Positive
Ast	ENSG00000007516	rs4984814	2006	-13590	0.440851	1663	2154	3.65421e-220	0.810739	0.0230119	1.75285e-09	-0.159625	0.0264182	5.994e-14	0.178201	0.0235947	1141	6.83915e-11	9.49399e-09	PCG	BAIAP3	Positive
Ast	BrainMetalnc.26512	rs742460	2506	-6174	0.281212	1162	1374	6.51149e-06	0.139499	0.0308699	8.87293e-06	-0.119411	0.0268194	3.09433e-10	0.196329	0.0310634	1124	3.47803e-07	2.41407e-05	LncRNA	GNPTG	Positive
Ast	ENSG00000089486	rs4786508	7373	-20786	0.267704	1136	1308	8.94801e-76	0.56363	0.0295364	1.29834e-20	-0.229076	0.0243889	3.76904e-32	0.350005	0.0292285	1178	4.43993e-29	3.38988e-26	PCG	CDIP1	Positive
Ast	ENSG00000102858	rs844488	70889	-3592	0.432051	1660	2111	6.2691e-281	-0.911486	0.022183	1.73578e-06	0.121031	0.0252479	6.19897e-10	-0.14354	0.0231133	1270	7.87269e-07	4.80864e-05	PCG	MGRN1	Positive
Ast	ENSG00000067836	rs9932706	-115	-5820	0.471551	1787	2304	2.22675e-55	-0.442192	0.0274989	5.26788e-09	0.188632	0.0321923	3.32922e-16	-0.234349	0.0285178	1250	4.16152e-13	6.35464e-11	PCG	ROGDI	Positive
Ast	BrainMetalnc.26830	rs8049809	-5365	-10666	0.235162	1010	1149	9.41755e-09	-0.190892	0.0331356	0.00127071	0.0808444	0.0250581	2.69965e-09	-0.198891	0.0333086	1372	3.70391e-06	0.000188529	LncRNA	SEC14L5	Positive
Ast	ENSG00000184602	rs8059262	21818	11191	0.492427	1822	2406	3.95379e-54	0.432593	0.0272374	1.9319e-07	-0.169874	0.0325379	9.04068e-11	0.174242	0.0267617	1018	9.20341e-08	7.80756e-06	PCG	SNN	Positive
Ast	ENSG00000234719	rs393329	49306	-78	0.382317	1501	1868	0	1.20551	0.0159581	0.00297884	-0.0484713	0.0163044	5.00117e-07	0.0799542	0.0158645	1004	0.000502117	0.0136917	PCG	NPIPB2	Positive
Ast	BrainMetalnc.27213	rs2925508	28796	-25227	0.439623	1683	2148	4.3196e-36	0.355822	0.0279081	1.2196e-06	-0.15227	0.0313012	2.65564e-09	0.167811	0.0280909	472	1.25346e-06	7.08903e-05	LncRNA	SMG1	Positive
Ast	BrainMetalnc.27214	rs2606549	-1214	-2204	0.440033	1679	2150	4.81554e-29	0.302448	0.0266911	1.11113e-37	-0.391764	0.0300177	2.71682e-62	0.460569	0.0268657	458	1.2443e-59	1.90005e-56	LncRNA	SMG1	Positive
Ast	BrainMetalnc.27525	rs2925635	239780	162707	0.379861	1506	1856	1.70481e-18	-0.256592	0.0290068	0.00270867	0.0872096	0.0290498	4.21274e-06	-0.132507	0.0287368	469	0.00197578	0.03819	LncRNA		Positive
Ast	BrainMetalnc.27722	rs12445568	-107	-18737	0.363488	1453	1776	4.43109e-10	-0.182052	0.0290648	7.51237e-11	0.19107	0.0292196	5.21456e-19	-0.257316	0.0286496	267	1.39229e-16	3.03717e-14	LncRNA	STX1B	Positive
Ast	ENSG00000187193	rs1599933	-520	-2246	0.436963	1682	2135	3.89588e-29	0.321092	0.0282877	0.0182985	-0.0754587	0.031959	2.24477e-06	0.137285	0.0289545	831	0.00186541	0.0365189	PCG	MT1X	Positive
Ast	ENSG00000140848	rs291053	23483	-32303	0.264838	1129	1294	3.60499e-32	-0.378159	0.0315694	0.00102616	0.0844489	0.02569	1.23257e-07	-0.16654	0.0313969	910	0.000112164	0.00356822	PCG	CPNE2	Positive
Ast	BrainMetalnc.28679	rs8060185	97160	89251	0.384159	1549	1877	1.86698e-27	-0.317468	0.0288879	8.83586e-17	0.245847	0.0293383	5.23259e-28	-0.317611	0.028589	397	2.07734e-25	1.05737e-22	LncRNA		Positive
Ast	ENSG00000226232	rs8060185	97103	77303	0.384159	1549	1877	2.87866e-51	-0.438195	0.0284158	3.21346e-13	0.211412	0.0288589	2.3556e-22	-0.27619	0.0281217	403	9.49308e-20	3.62398e-17	Other	-	Positive
Ast	ENSG00000140830	rs7203307	156888	106781	0.271388	1136	1326	6.52549e-20	0.287338	0.0311818	0.00079795	-0.0871969	0.0259691	2.76742e-06	0.147954	0.0314902	529	0.00146396	0.0302091	PCG	TXNL4B	Positive
Ast	ENSG00000257017	rs7200447	-230229	-236692	0.258289	1094	1262	0.000365049	-0.115156	0.0322643	5.88175e-05	0.10633	0.0264201	2.60567e-07	-0.162153	0.0313977	512	0.00013341	0.00415751	PCG	KNOWN	Positive
Ast	ENSG00000135698	rs1834054	25893	3467	0.355096	1449	1735	3.2317e-07	0.154832	0.0302192	0.000423307	-0.102573	0.0290578	1.00081e-06	0.151741	0.0309423	1738	0.00173941	0.0349485	PCG	MPHOSPH6	Positive
Ast	ENSG00000103264	rs11117266	-828	-63251	0.236594	1009	1156	3.8877e-08	-0.181433	0.032907	0.00207332	0.0796799	0.0258463	5.70696e-08	-0.172302	0.0316456	1749	9.98147e-05	0.00338705	PCG	FBXO31	Positive
Ast	ENSG00000226180	rs79813982	36350	33740	0.104585	486	511	6.29717e-24	0.468366	0.0459438	0.0832614	-0.0376991	0.0217564	5.80323e-07	0.226356	0.0451719	1651	0.000958114	0.0218364	LncRNA	AC010536.1	Positive
Ast	ENSG00000104731	rs55950332	40378	-29129	0.460909	1728	2252	4.33845e-92	0.557585	0.0262377	6.81429e-07	-0.152221	0.0305684	1.10959e-08	0.149633	0.0261011	1730	1.9196e-05	0.000751596	PCG	KLHDC4	Positive
Ast	ENSG00000260279	rs3102347	7333	5144	0.160458	727	784	1.17487e-16	-0.321242	0.0384944	0.00268266	0.0696466	0.0231767	2.78554e-10	-0.252175	0.0397956	1149	3.20058e-07	2.32728e-05	LncRNA	AC137932.1	Positive
Ast	ENSG00000185324	rs258321	9328	-6289	0.46009	1709	2248	9.94019e-19	0.245851	0.0275993	5.89107e-06	-0.147391	0.032463	1.27516e-08	0.157564	0.0275998	843	1.07496e-05	0.000482785	PCG	CDK10	Positive
Ast	ENSG00000158792	rs1110331	11631	6283	0.46009	1707	2248	6.58156e-11	-0.182468	0.0278185	0.000864293	0.107547	0.0322435	2.8029e-06	-0.128834	0.027436	831	0.00232921	0.0418436	PCG	SPATA2L	Positive
Ast	BrainMetalnc.29428	rs72477006	-3950	-25065	0.0974212	457	476	4.93441e-51	-0.713157	0.0463614	0.0669981	0.0391145	0.0213448	1.3017e-09	-0.283387	0.0465272	634	8.2528e-07	4.84693e-05	LncRNA	TCF25	Positive
Ast	BrainMetalnc.72125	rs1460404	30079	7197	0.194228	859	949	1.40587e-33	-0.429918	0.035065	7.7196e-05	0.0936365	0.0236474	9.06234e-09	-0.204276	0.0354183	2332	2.11334e-05	0.000638136	LncRNA	CSMD1	Positive
Ast	ENSG00000154328	rs4840581	8421	-9285	0.431846	1674	2110	0.00134777	0.0927741	0.0289077	8.12718e-13	-0.23324	0.0324057	1.99135e-17	0.253581	0.0296295	916	1.82408e-14	4.22274e-12	PCG	NEIL2	Positive
Ast	ENSG00000147439	rs13271626	-11268	-58901	0.327057	1314	1598	3.89039e-54	0.450536	0.0283652	0.000301033	-0.0967714	0.0267352	1.38613e-06	0.137513	0.0284174	975	0.00135148	0.0210921	PCG	BIN3	Positive
Ast	ENSG00000147421	rs10088428	161611	-12758	0.262178	1099	1281	1.09808e-29	-0.356404	0.0310808	1.21576e-06	0.124525	0.0255945	1.91396e-07	-0.158753	0.0303976	707	0.000135317	0.00335635	PCG	HMBOX1	Positive
Ast	BrainMetalnc.72818	rs11778025	111803	111392	0.367581	1444	1796	0.000298764	-0.104571	0.0288744	1.58525e-06	0.143105	0.029739	7.85922e-08	-0.156278	0.0290113	608	4.77841e-05	0.00138275	LncRNA	HMBOX1	Positive
Ast	BrainMetalnc.73323	rs7002395	40580	-730050	0.243144	1037	1188	2.8602e-10	0.20714	0.03271	0.00238271	-0.0773139	0.0254235	1.83739e-06	0.152327	0.031853	534	0.000981166	0.0161615	LncRNA	RB1CC1	Positive
Ast	ENSG00000133739	rs16913681	109171	70306	0.331764	1348	1621	3.10863e-106	-0.629276	0.0273418	0.000766481	0.0875971	0.0260019	8.92349e-06	-0.122901	0.0276108	209	0.00186501	0.0275585	PCG	LRRCC1	Positive
Ast	BrainMetalnc.74099	rs35795205	192725	-476780	0.210602	915	1029	0.0164365	0.0832308	0.0346688	0.0015732	-0.0779188	0.0246236	2.75719e-07	0.181053	0.0351299	501	0.000138135	0.00336613	LncRNA		Positive
Ast	BrainMetalnc.74148	rs1180	760	-10505	0.381294	1503	1863	5.83502e-273	-0.914503	0.0226739	0.00180309	0.0742799	0.0237747	9.24223e-06	-0.10301	0.0231818	252	0.00232904	0.0326772	LncRNA	OTUD6B	Positive
Ast	ENSG00000147649	rs2468010	108249	22173	0.33115	1347	1618	2.22263e-17	0.25416	0.0297426	6.18039e-05	-0.112042	0.027921	7.62709e-07	0.148274	0.0299085	568	0.000433219	0.0085963	PCG	MTDH	Positive
Ast	ENSG00000104341	rs75816759	-166992	-244948	0.117479	540	574	0.000151739	0.1672	0.0440676	0.0195637	-0.0528677	0.0226302	3.05546e-07	0.233193	0.0454185	564	0.000172328	0.00412696	PCG	LAPTM4B	Positive
Ast	ENSG00000132561	rs2331807	59850	-108034	0.408514	1575	1996	4.79853e-56	0.439262	0.0271396	1.93481e-06	-0.138165	0.0289551	1.20166e-10	0.170682	0.0263917	553	6.64516e-08	4.3953e-06	PCG	MATN2	Positive
Ast	ENSG00000174226	rs1786345	89634	-892	0.439623	1690	2148	5.66494e-148	0.705522	0.0253802	3.38668e-05	-0.118586	0.0285507	1.24359e-06	0.122575	0.0252172	591	0.000734961	0.0129578	PCG	SNX31	Positive
Ast	BrainMetalnc.74967	rs2436142	-7886	-13968	0.427343	1640	2088	9.02571e-54	-0.433567	0.0273974	0.000733177	0.100461	0.029712	4.02198e-06	-0.125916	0.0272499	598	0.00240514	0.0331618	LncRNA	KCNQ3	Positive
Ast	ENSG00000014164	rs56671711	111509	7721	0.496521	1819	2426	1.06546e-28	0.311695	0.0276865	5.73524e-05	-0.13542	0.0335984	8.873e-07	0.134876	0.0273704	701	0.000621997	0.0115194	PCG	ZC3H3	Positive
Ast	ENSG00000185803	rs1971250	49985	42849	0.373516	1463	1825	5.90186e-10	0.178404	0.028691	7.68821e-05	-0.11639	0.0293865	2.39997e-07	0.151824	0.0293094	447	0.000107279	0.00286558	PCG	SLC52A2	Positive
Ast	ENSG00000198169	rs2958481	37408	2784	0.467049	1731	2282	1.87862e-20	-0.258658	0.0276574	0.000115819	0.123519	0.0319906	1.7678e-06	-0.13208	0.0275741	300	0.000530339	0.010091	PCG	ZNF251	Positive
Ast	BrainMetalnc.35111	rs62129498	-5901	-7688	0.145108	659	709	5.4948e-13	0.291005	0.0401284	0.0267391	-0.051717	0.0233312	1.90165e-06	0.190938	0.0399854	1249	0.00237516	0.0386487	LncRNA	BTBD2	Positive
Ast	ENSG00000196365	rs8102642	-21917	-50613	0.349366	1388	1707	7.45176e-157	-0.729146	0.0253553	0.00015796	0.0938791	0.0248086	1.28791e-07	-0.135777	0.0256365	1140	0.000146821	0.00373466	PCG	LONP1	Positive
Ast	ENSG00000104980	rs55956614	11219	-5684	0.0605813	288	296	3.66139e-101	1.21991	0.0544766	0.00320677	-0.0574781	0.0194833	4.59904e-09	0.313223	0.0532478	1032	4.74621e-06	0.000203008	PCG	TIMM44	Positive
Ast	ENSG00000267855	rs2913943	-5210	-17817	0.326852	1351	1597	7.07981e-07	-0.152278	0.0306259	9.78899e-05	0.110261	0.0282559	9.51792e-08	-0.164504	0.0307378	976	9.28949e-05	0.00251767	PCG	NDUFA7	Positive
Ast	ENSG00000171291	rs12459059	32386	-2603	0.277528	1170	1356	1.24878e-10	-0.204379	0.0316311	0.00398048	0.0771526	0.0267663	1.70153e-06	-0.149795	0.0312219	456	0.0007759	0.015062	PCG	ZNF439	Positive
Ast	ENSG00000188269	rs66824756	10140	8082	0.387843	1547	1895	3.62027e-244	0.892345	0.0237495	2.2719e-05	-0.101649	0.0239479	2.90291e-11	0.159464	0.0238634	837	2.42974e-08	2.06808e-06	PCG	OR7A5	Positive
Ast	BrainMetalnc.36171	rs56317414	19886	7804	0.450266	1694	2200	0	1.03423	0.0192633	4.05934e-06	-0.103194	0.022342	6.02006e-10	0.120738	0.019427	761	4.58127e-07	2.30417e-05	LncRNA		Positive
Ast	ENSG00000267594	rs11668604	22227	2559	0.374744	1464	1831	2.04623e-294	0.93104	0.021977	0.00287094	-0.068057	0.0228054	2.604e-06	0.102933	0.0218496	760	0.00197904	0.0334322	Other	-	Positive
Ast	BrainMetalnc.36186	rs3826722	4002	3321	0.414449	1603	2025	8.94093e-06	0.127861	0.0287279	1.70997e-06	-0.147794	0.0308115	3.63563e-08	0.158059	0.0286058	732	2.66128e-05	0.000853537	LncRNA	TPM4	Positive
Ast	ENSG00000006016	rs10412858	75861	40728	0.344044	1388	1681	2.60501e-31	-0.343346	0.0290875	0.000267414	0.10141	0.0277812	2.87686e-07	-0.148932	0.0289427	800	0.000230149	0.00541829	PCG	CRLF1	Positive
Ast	ENSG00000184635	rs2335365	-13580	-76131	0.226156	985	1105	9.09167e-27	0.360809	0.0332888	5.52307e-06	-0.112515	0.024707	3.26918e-12	0.228843	0.0326865	506	1.6542e-09	1.92671e-07	PCG	ZNF93	Positive
Ast	BrainMetalnc.36505	rs12977293	506	-4388	0.385796	1517	1885	9.32068e-10	0.177845	0.0289421	0.000383158	-0.107113	0.0301186	1.72219e-06	0.139148	0.0290176	463	0.000797372	0.0153442	LncRNA	ZNF682	Positive
Ast	ENSG00000267296	rs910645638	6547	4369	0.145722	653	712	0.00061324	0.136351	0.0397505	0.0340139	-0.0491223	0.0231588	2.04265e-08	0.216001	0.0383861	787	1.60756e-05	0.000577418	LncRNA	CEBPA-DT	Positive
Ast	BrainMetalnc.36810	rs910645638	6547	4350	0.145722	653	712	0.000406061	0.140663	0.0397239	0.0293037	-0.0504679	0.0231434	6.06122e-09	0.223867	0.0383604	787	4.77018e-06	0.000203008	LncRNA		Positive
Ast	ENSG00000168661	rs2546001	3034	-15233	0.441465	1684	2157	2.13258e-19	-0.255922	0.0281773	3.91698e-08	0.178354	0.0323564	1.49327e-12	-0.205951	0.0289571	745	1.11249e-09	1.36774e-07	PCG	ZNF30	Positive
Ast	ENSG00000161265	rs3933421	31277	28296	0.201801	890	986	2.35259e-73	0.625282	0.0333561	0.000281139	-0.0847045	0.0232872	3.73998e-06	0.151896	0.0327646	682	0.00255067	0.0406088	PCG	U2AF1L4	Positive
Ast	BrainMetalnc.37005	rs7250507	32200	15988	0.491199	1832	2400	1.00287e-32	0.339793	0.028104	7.63592e-08	-0.183977	0.03412	3.26694e-10	0.180658	0.0286225	278	9.0821e-08	5.74248e-06	LncRNA	ZNF420	Positive
Ast	ENSG00000120784	rs256744	-266422	-327750	0.36492	1461	1783	1.12697e-08	-0.168881	0.0294723	0.000105939	0.115222	0.0296739	1.82381e-07	-0.156425	0.0299002	350	6.38334e-05	0.00180052	PCG	ZFP30	Positive
Ast	ENSG00000196218	rs117044521	113474	-40399	0.0683586	322	334	3.80672e-58	-0.882209	0.0534273	0.0063663	0.0556839	0.0203921	2.59042e-07	-0.291582	0.0564466	549	0.000142214	0.00365953	PCG	RYR1	Positive
Ast	ENSG00000068903	rs892034	-197	-21504	0.487311	1789	2381	3.04036e-06	-0.131294	0.0280603	0.000169636	0.12828	0.0340605	3.93804e-08	-0.154845	0.0280964	601	2.36676e-05	0.000793583	PCG	SIRT2	Positive
Ast	ENSG00000077348	rs75611450	-21151	-32136	0.0671306	316	328	0.0162032	0.13639	0.0566878	0.0236179	-0.0484626	0.021399	2.96863e-06	0.284597	0.0607603	538	0.00159713	0.0278302	PCG	EXOSC5	Positive
Ast	ENSG00000267058	rs4802201	-47496	-47915	0.49079	1817	2398	4.03305e-17	-0.238702	0.0281681	3.16295e-07	0.180461	0.0351932	1.19219e-10	-0.18716	0.0289342	709	8.45261e-08	5.50165e-06	LncRNA	ENSG00000267058	Positive
Ast	ENSG00000125741	rs3826861	25935	-31480	0.3772	1470	1843	0.00273704	0.0858149	0.0286155	2.60081e-06	-0.138441	0.0293855	4.75536e-11	0.186085	0.028159	892	4.24178e-08	3.12902e-06	PCG	OPA3	Positive
Ast	ENSG00000090372	rs312182	84856	57373	0.386615	1505	1889	5.84223e-09	-0.167041	0.0285926	0.000435808	0.105079	0.0298332	4.40522e-07	-0.142781	0.0281935	745	0.000328189	0.00733619	PCG	STRN4	Positive
Ast	ENSG00000176920	rs679574	6880	-3100	0.49079	1810	2398	3.2102e-44	0.389515	0.0273672	4.42941e-06	-0.153454	0.0333556	9.86415e-09	0.155699	0.0270639	867	8.55222e-06	0.000332036	PCG	FUT2	Positive
Ast	ENSG00000104946	rs7248744	3698	-6976	0.435121	1672	2126	2.28708e-07	-0.149168	0.0287463	2.30319e-05	0.134659	0.0317481	3.09043e-08	-0.155324	0.0279649	933	2.88337e-05	0.000911558	PCG	TBC1D17	Positive
Ast	ENSG00000221923	rs2059818	9350	-6528	0.375154	1478	1833	2.46049e-246	0.871706	0.0230716	5.34346e-08	-0.128988	0.023639	5.33047e-13	0.168005	0.0231538	1344	7.16416e-10	9.32605e-08	PCG	ZNF880	Positive
Ast	ENSG00000083844	rs8111661	49458	18112	0.485264	1818	2371	0.0441258	0.0584245	0.0290101	1.94631e-05	-0.146107	0.0341418	4.70943e-07	0.144542	0.028614	875	0.000412075	0.00885361	PCG	ZNF264	Positive
Ast	ENSG00000186230	rs11666890	-55856	-67632	0.431846	1641	2110	9.27691e-17	-0.234618	0.0280181	1.91008e-06	0.15382	0.0322183	3.191e-10	-0.179426	0.0284107	800	2.5528e-07	1.41234e-05	PCG	ZNF749	Positive
Ast	ENSG00000198131	rs260421	-8570	-57471	0.35919	1434	1755	0.000543673	-0.102059	0.0294726	0.00155899	0.091828	0.0289948	4.15801e-07	-0.14744	0.0290499	426	0.000177131	0.00435546	PCG	ZNF544	Positive
Ast	ENSG00000186891	rs2274791	-5950	-9034	0.100287	461	490	8.26107e-66	0.782371	0.0442899	2.93603e-05	-0.0876545	0.0209385	2.98597e-09	0.265819	0.044642	411	1.22724e-06	4.56378e-05	PCG	TNFRSF18	Positive
Ast	ENSG00000242485	rs17363048	1546	-3700	0.0976259	452	477	6.1604e-39	0.613918	0.0462112	0.0338668	-0.0457067	0.0215308	5.43827e-06	0.209354	0.0459386	555	0.00301824	0.0354912	PCG	MRPL20	Positive
Ast	BrainMetalnc.403	rs3766183	-59219	-82501	0.0931232	412	455	8.34695e-10	-0.296358	0.0480897	0.573217	0.0126392	0.022434	5.98341e-06	-0.167983	0.0370254	590	0.00353021	0.0397818	LncRNA		Positive
Ast	ENSG00000235098	rs307371	-80684	-84033	0.0920999	409	450	1.39455e-116	-1.08078	0.0445645	0.855947	0.0036687	0.0202071	2.47332e-12	-0.250825	0.0356239	573	1.41721e-09	1.02834e-07	PCG	ANKRD65	Positive
Ast	ENSG00000198912	rs114272920	25551	14398	0.144904	643	708	3.23349e-105	0.819405	0.0357955	7.35311e-06	-0.0940946	0.0209429	2.81499e-11	0.230129	0.0344146	1229	3.45963e-08	1.87134e-06	PCG	C1orf174	Positive
Ast	ENSG00000049245	rs72853807	-100477	-110613	0.0628326	293	307	0.000149382	0.219238	0.0577235	0.207503	-0.026788	0.0212469	1.6553e-06	0.289441	0.0602588	699	0.00115706	0.0167099	PCG	VAMP3	Positive
Ast	ENSG00000142599	rs1763838	60874	-435649	0.291854	1212	1426	4.21399e-41	0.409701	0.0299485	3.69651e-07	-0.135917	0.0266609	9.79344e-14	0.221613	0.0296	999	9.78365e-11	9.38915e-09	PCG	RERE	Positive
Ast	ENSG00000177000	rs11559040	2359	-18373	0.186451	824	911	1.60672e-55	0.554267	0.0344207	3.56016e-07	-0.116757	0.0228703	5.26734e-15	0.26272	0.0333806	762	4.01372e-12	4.97534e-10	PCG	MTHFR	Positive
Ast	BrainMetalnc.821	rs12403427	573	-4810	0.169668	771	829	7.57634e-35	0.467871	0.0374008	0.000142721	-0.089559	0.0235097	4.50364e-12	0.261442	0.0375892	715	3.2201e-09	2.03826e-07	LncRNA		Positive
Ast	ENSG00000285646	rs12403427	573	-5785	0.169668	771	829	1.21817e-92	0.756108	0.0354616	2.47301e-05	-0.0941872	0.0222908	7.18652e-13	0.257131	0.0356403	715	5.13836e-10	4.36761e-08	LncRNA	AL021155.4	Positive
Ast	BrainMetalnc.980	rs157249	1906	-5426	0.475849	1751	2325	1.1031e-30	-0.318775	0.0273041	5.15265e-05	0.133679	0.0329597	9.18338e-07	-0.133569	0.0271425	611	0.000561105	0.0095936	LncRNA		Positive
Ast	ENSG00000133216	rs2817872	101794	-108867	0.295538	1231	1444	3.69926e-25	-0.320237	0.0305629	0.00635561	0.0726658	0.0266057	6.42254e-07	-0.1515	0.0303531	692	0.00044444	0.00806224	PCG	EPHB2	Positive
Ast	ENSG00000189266	rs6683804	93645	87022	0.1842	808	900	6.78349e-77	0.653721	0.0339825	0.0246442	-0.0509725	0.0226713	4.22012e-06	0.161344	0.0349933	532	0.0022451	0.0280638	PCG	PNRC2	Positive
Ast	ENSG00000188529	rs6424144	84826	68246	0.499386	1831	2440	1.03351e-213	-0.808635	0.0233753	3.1606e-06	0.134176	0.0287255	1.54383e-06	-0.111798	0.0232072	539	0.000832126	0.0129611	PCG	SRSF10	Positive
Ast	BrainMetalnc.1336	rs55794721	-11880	-101431	0.393164	1545	1921	1.27425e-21	0.275438	0.0285639	6.70435e-08	-0.165507	0.0305608	4.88646e-11	0.191221	0.0289541	517	2.5263e-08	1.3918e-06	LncRNA	RSRP1	Positive
Ast	ENSG00000261349	rs2257611	41612	40578	0.339951	1357	1661	5.1158e-14	-0.222218	0.0293408	1.31989e-05	0.12122	0.0277663	1.42483e-07	-0.159039	0.0301352	495	7.05292e-05	0.00176323	Other	-	Positive
Ast	BrainMetalnc.1335	rs2257611	41612	39975	0.339951	1357	1661	4.27653e-17	-0.247784	0.0292641	1.78531e-05	0.119048	0.0276937	3.16154e-07	-0.154124	0.0300564	495	0.000156496	0.00334947	LncRNA	RSRP1	Positive
Ast	ENSG00000187010	rs55794721	-37263	-95269	0.393164	1545	1921	0	-1.12917	0.0182169	1.53812e-12	0.138541	0.0194905	1.02579e-11	-0.126231	0.0184658	508	5.21102e-09	3.10056e-07	PCG	RHD	Positive
Ast	ENSG00000157978	rs3924486	22783	-2497	0.483627	1783	2363	1.22028e-213	0.805594	0.0232922	0.00397857	-0.0825784	0.0286472	6.20242e-06	0.107911	0.0238251	499	0.00309501	0.0360308	PCG	LDLRAP1	Positive
Ast	BrainMetalnc.1380	rs35899920	2482	-15540	0.203029	889	992	3.83486e-43	0.473219	0.0336954	7.70712e-08	-0.127786	0.0237064	3.06127e-19	0.30711	0.0339655	427	1.30716e-16	2.59254e-14	LncRNA	EXTL1	Positive
Ast	ENSG00000084628	rs34265582	34084	-26058	0.237208	1013	1159	5.61408e-239	-0.985175	0.0265757	0.0059814	0.055741	0.0202605	3.3357e-06	-0.124285	0.0266718	555	0.00185132	0.0241564	PCG	NKAIN1	Positive
Ast	BrainMetalnc.1657	rs10753258	25877	25057	0.490176	1807	2395	1.10524e-63	-0.466509	0.0268866	0.000523919	0.111039	0.0319734	4.94044e-06	-0.124779	0.027259	415	0.00205028	0.0262913	LncRNA	COL16A1	Positive
Ast	ENSG00000189280	rs2064899	-4659	-8124	0.387638	1511	1894	7.93514e-05	0.113776	0.0287816	0.000966804	-0.0956963	0.0289634	3.51701e-06	0.134897	0.0290177	562	0.00197656	0.0254557	PCG	GJB5	Positive
Ast	ENSG00000116885	rs3917979	55964	21340	0.19034	836	930	2.87789e-42	0.482278	0.0347238	0.00451432	-0.0669542	0.0235553	3.29402e-06	0.159949	0.0343063	456	0.00150208	0.0205869	PCG	OSCP1	Positive
Ast	BrainMetalnc.1908	rs215774	-3650	-6307	0.289194	1218	1413	7.48449e-194	0.861881	0.0264348	1.29288e-06	-0.109587	0.0225813	7.41334e-12	0.187246	0.0272033	587	4.35163e-09	2.67191e-07	LncRNA		Positive
Ast	ENSG00000284650	rs215774	-3650	-6307	0.289194	1218	1413	6.72271e-194	0.86197	0.0264337	1.23311e-06	-0.109796	0.0225804	7.49708e-12	0.187194	0.0272021	587	4.40079e-09	2.67191e-07	LncRNA	AL031430.1	Positive
Ast	ENSG00000233621	rs75785507	123464	-13	0.3377	1364	1650	2.39523e-138	-0.701984	0.0262534	1.17444e-06	0.119926	0.0246143	1.12155e-11	-0.178672	0.0261872	697	7.8172e-09	4.56003e-07	LncRNA	LINC01137	Positive
Ast	BrainMetalnc.1916	rs75785507	19656	-16	0.3377	1364	1650	5.95983e-117	-0.651602	0.0268198	2.14834e-05	0.107049	0.0251454	1.19928e-09	-0.163298	0.0267522	653	7.8313e-07	3.06554e-05	LncRNA		Positive
Ast	BrainMetalnc.1986	rs67452844	-322412	-329080	0.246623	1059	1205	2.31242e-05	0.139946	0.0330017	0.000393255	-0.0920872	0.0259437	1.3294e-07	0.170611	0.0322493	605	8.04286e-05	0.00199396	LncRNA	MACF1	Positive
Ast	ENSG00000187815	rs529762	131350	112297	0.462546	1725	2260	2.07421e-31	0.324972	0.0274837	3.09709e-05	-0.134541	0.0322327	8.42346e-08	0.149923	0.027897	641	5.39944e-05	0.00143423	PCG	ZFP69	Positive
Ast	ENSG00000177868	rs11210713	-38480	-48825	0.278142	1155	1359	5.09907e-105	0.648295	0.0283505	7.08213e-06	-0.108085	0.0240138	1.788e-09	0.166115	0.0275072	379	6.77652e-07	2.68802e-05	PCG	SVBP	Positive
Ast	BrainMetalnc.2128	rs17386162	726	-8720	0.170692	756	834	5.64773e-20	-0.340262	0.0368611	0.00262951	0.0711656	0.0236342	1.53273e-06	-0.176267	0.0365788	370	0.000567111	0.00964089	LncRNA	ERMAP	Positive
Ast	BrainMetalnc.2272	rs3014237	-72600	-145546	0.279779	1182	1367	1.39615e-06	-0.153853	0.0318037	0.00162932	0.0841869	0.0266909	1.46365e-06	-0.153947	0.0318857	310	0.000453731	0.00808293	LncRNA	IPP	Positive
Ast	ENSG00000078618	rs1770791	9172	-80545	0.241097	1023	1178	0.00836015	0.0866947	0.0328474	0.00364815	-0.0736567	0.0253124	3.35901e-06	0.155798	0.0334449	243	0.00081624	0.0128226	PCG	NRDC	Positive
Ast	BrainMetalnc.2575	rs6699595	-14029	-18985	0.376996	1504	1842	9.05527e-87	0.560853	0.0272762	2.32432e-06	-0.133137	0.028122	1.29066e-10	0.179363	0.0277813	745	9.6154e-08	5.01856e-06	LncRNA	SSBP3	Positive
Ast	ENSG00000243725	rs300269	-135142	-161938	0.471551	1791	2304	6.29836e-23	-0.285972	0.0287162	2.8106e-06	0.161016	0.0342936	3.92155e-08	-0.158582	0.0287706	741	2.90587e-05	0.000815563	PCG	TTC4	Positive
Ast	ENSG00000132854	rs17855078	37361	-45907	0.339746	1374	1660	2.61141e-57	0.463959	0.02832	5.81083e-09	-0.164122	0.0280887	2.25465e-13	0.20809	0.028219	721	1.6256e-10	1.5113e-08	PCG	KANK4	Positive
Ast	ENSG00000116641	rs9436221	-16610	-250698	0.316414	1277	1546	9.34205e-13	-0.212339	0.0295816	1.48732e-10	0.174918	0.0271849	6.09296e-07	-0.143197	0.0286307	736	0.000448442	0.00808293	PCG	DOCK7	Positive
Ast	ENSG00000079739	rs7532532	-243109	-309943	0.143676	638	702	0.00827302	-0.104929	0.0397024	3.20255e-05	0.0949165	0.0227816	4.82582e-06	-0.189186	0.0412845	600	0.00289549	0.0342693	PCG	PGM1	Positive
Ast	BrainMetalnc.3108	rs3828120	-3432	-11112	0.326648	1329	1596	0.0175735	-0.071659	0.0301582	0.000154134	0.107125	0.0282633	1.43664e-07	-0.160262	0.0303756	601	8.63422e-05	0.00212288	LncRNA	ADGRL2	Positive
Ast	BrainMetalnc.3204	rs7551787	1060	-49718	0.441465	1641	2157	0.0407003	-0.0566837	0.0276822	1.99645e-06	0.151455	0.0317828	5.79648e-10	-0.175519	0.0282142	540	3.1301e-07	1.34957e-05	LncRNA	TTLL7	Positive
Ast	ENSG00000117174	rs313719	141632	82616	0.327671	1337	1601	3.40842e-38	-0.383854	0.0291968	8.47031e-05	0.108004	0.0274308	4.94148e-10	-0.182675	0.029245	645	3.18725e-07	1.35458e-05	PCG	ZNHIT6	Positive
Ast	BrainMetalnc.3279	rs385437	1133	-1439	0.141629	642	692	0.026451	-0.0902194	0.0406234	0.00703022	0.0618864	0.0229405	4.68057e-10	-0.256714	0.0410416	516	2.41518e-07	1.07241e-05	LncRNA	ODF2L	Positive
Ast	BrainMetalnc.3375	rs9428044	59648	-19761	0.295948	1236	1446	0.0254309	-0.0700069	0.0313066	0.000751305	0.089795	0.0266106	1.41025e-06	-0.155819	0.0322234	410	0.000578202	0.00977359	LncRNA	LRRC8B	Positive
Ast	BrainMetalnc.3572	rs273865	104084	-6664	0.471756	1744	2305	1.17005e-07	0.148808	0.0280033	5.15644e-05	-0.137711	0.0339554	3.46708e-06	0.130407	0.0280339	413	0.0014319	0.0199061	LncRNA	PTBP2	Positive
Ast	ENSG00000122477	rs3753492	-269508	-299333	0.0573066	271	280	1.04786e-32	0.718066	0.0594095	0.0449268	-0.0419686	0.0209177	1.10191e-05	0.238156	0.0540611	370	0.00407708	0.043319	PCG	LRRC39	Positive
Ast	ENSG00000134184	rs36209093	-649	-6580	0.336676	1366	1645	5.91653e-242	0.900212	0.0240962	0.152132	-0.0327364	0.0228529	8.65611e-08	0.128348	0.0239045	697	6.03331e-05	0.00157066	PCG	GSTM1	Positive
Ast	BrainMetalnc.4901	rs1063125	341	-37929	0.197503	874	965	0	1.30865	0.0242562	0.00229625	-0.051496	0.0168718	6.04342e-12	0.160702	0.0232469	355	2.14541e-09	1.38752e-07	LncRNA	ATP1A4	Positive
Ast	ENSG00000248485	rs72706680	-928618	-955323	0.0810479	378	396	0.0145259	0.126928	0.0518975	0.00721946	-0.0593228	0.0220628	3.31282e-08	0.266798	0.0481416	593	1.9645e-05	0.000578653	PCG	PCP4L1	Positive
Ast	BrainMetalnc.5228	rs1062976	12472	-19169	0.28817	1216	1408	1.27569e-94	-0.627815	0.0291006	0.000184371	0.0944665	0.0252229	3.18429e-10	-0.189039	0.0299313	490	1.5603e-07	7.25298e-06	LncRNA	SCYL3	Positive
Ast	BrainMetalnc.5375	rs12059936	2593	-18962	0.479738	1784	2344	4.84501e-24	0.286124	0.0279941	0.000324261	-0.123433	0.0342845	6.63198e-06	0.132032	0.0292428	494	0.0032762	0.0373437	LncRNA		Positive
Ast	ENSG00000116194	rs7546750	84657	63115	0.289603	1226	1415	3.884e-27	-0.340255	0.0311587	2.60257e-06	0.126387	0.0268278	5.00274e-06	-0.144781	0.0316467	457	0.00228625	0.0284586	PCG	ANGPTL1	Positive
Ast	ENSG00000143322	rs6668200	52815	-77539	0.0853459	400	417	2.41393e-10	0.32205	0.0506434	0.00679557	-0.0588953	0.0217405	2.35534e-07	0.247674	0.0477806	426	0.000100337	0.00239886	PCG	ABL2	Positive
Ast	ENSG00000198756	rs4651159	42176	-65699	0.351412	1435	1717	5.5981e-122	-0.665031	0.0267274	3.85413e-15	0.206984	0.0261659	1.82182e-32	-0.318104	0.026424	424	7.7245e-30	7.66013e-27	PCG	COLGALT2	Positive
Ast	BrainMetalnc.5685	rs71634161	-22996	-32267	0.114613	524	560	1.6739e-101	0.913633	0.0407229	0.0611413	-0.0386962	0.0206563	1.41739e-06	0.198747	0.0411096	370	0.000524433	0.00907086	LncRNA	PDC	Positive
Ast	BrainMetalnc.5733	rs2134098	88303	-32386	0.0966025	457	472	7.69679e-11	-0.318478	0.048731	0.0584663	0.041721	0.0220387	3.50902e-06	-0.231948	0.0498892	307	0.00107727	0.0158657	LncRNA	BRINP3	Positive
Ast	ENSG00000198892	rs2494112	-69975	-73882	0.472575	1740	2309	1.82329e-73	0.488964	0.0260625	1.04826e-08	-0.175838	0.0306199	5.02362e-14	0.197164	0.0260245	765	3.84307e-11	4.08326e-09	PCG	SHISA4	Positive
Ast	ENSG00000163431	rs4950743	21873	-28259	0.298199	1238	1457	2.29385e-07	-0.160652	0.0309628	1.1143e-05	0.119776	0.027204	2.11529e-07	-0.160224	0.0307898	765	0.00016182	0.00341428	PCG	LMOD1	Positive
Ast	ENSG00000133067	rs721559	25192	-100790	0.446582	1689	2182	5.61757e-35	-0.345088	0.0275301	1.17202e-08	0.177177	0.0309565	2.43264e-12	-0.193156	0.0274241	767	1.86583e-09	1.26156e-07	PCG	LGR6	Positive
Ast	ENSG00000133059	rs17345153	68364	-833	0.435939	1647	2130	6.79137e-34	0.337315	0.0273727	1.19873e-08	-0.174172	0.0304521	1.8009e-12	0.193733	0.0273407	634	1.14177e-09	8.70966e-08	PCG	DSTYK	Positive
Ast	ENSG00000143476	rs1854823	493507	421665	0.23025	1001	1125	0.0418298	0.0693562	0.0340602	0.000456753	-0.0878738	0.0250375	1.15452e-06	0.165527	0.03395	562	0.000648839	0.0107698	PCG	DTL	Positive
Ast	BrainMetalnc.6546	rs12124057	52993	13194	0.210806	921	1030	2.76682e-16	-0.284389	0.0345115	3.96786e-05	0.102341	0.0248587	2.55706e-08	-0.190654	0.0341204	504	1.28876e-05	0.00039938	LncRNA		Positive
Ast	BrainMetalnc.6659	rs61824282	-10998	-13643	0.47851	1788	2338	2.28633e-28	0.313309	0.0280066	3.63758e-05	-0.137679	0.0332798	1.29239e-07	0.14889	0.0281159	527	6.81092e-05	0.00171716	LncRNA	MIA3	Positive
Ast	ENSG00000272750	rs61824282	-10998	-13643	0.47851	1788	2338	8.22131e-73	0.501887	0.0268829	0.00051978	-0.111007	0.0319445	1.61505e-06	0.129765	0.0269878	527	0.000851129	0.0129852	LncRNA	AL592148.3	Positive
Ast	ENSG00000143771	rs12738799	65457	42856	0.236185	1000	1154	2.34296e-12	-0.22953	0.0325639	0.000736748	0.0853252	0.0252455	5.97134e-08	-0.179768	0.0330664	428	2.55573e-05	0.000738185	PCG	CNIH4	Positive
Ast	BrainMetalnc.6818	rs595155	-107450	-114336	0.1842	839	900	2.35745e-48	-0.542078	0.0362856	0.000496266	0.0818861	0.0234802	3.51622e-07	-0.189465	0.0370952	510	0.000179327	0.00370485	LncRNA	CDC42BPA	Positive
Ast	ENSG00000162885	rs2481095	85251	28004	0.323168	1327	1579	5.28045e-64	0.500846	0.0287866	0.000706363	-0.0899437	0.0265209	4.03923e-08	0.15339	0.0278552	798	3.22331e-05	0.000887902	PCG	B3GALNT2	Positive
Ast	ENSG00000230325	rs771227532	-644	-996	0.319484	1299	1561	2.00571e-05	-0.127188	0.029768	1.23881e-10	0.176847	0.0273648	2.11813e-18	-0.270241	0.0306366	859	1.81948e-15	2.84892e-13	LncRNA		Positive
Ast	BrainMetalnc.7232	rs12079991	44200	-30506	0.273844	1144	1338	5.2882e-57	-0.488552	0.0299082	3.76183e-07	0.130566	0.0256282	1.11711e-10	-0.193829	0.029919	956	1.06796e-07	5.29528e-06	LncRNA	FMN2	Positive
Ast	BrainMetalnc.7279	rs2840605	3159	-80800	0.416087	1616	2033	0	1.15062	0.0172673	4.04676e-12	-0.131883	0.0189199	9.86604e-20	0.157461	0.0171734	925	9.12609e-17	2.08847e-14	LncRNA	PLD5	Positive
Ast	ENSG00000272865	rs2840605	3027	-58872	0.416087	1616	2033	0	1.13095	0.0177851	2.42509e-11	-0.130743	0.0194872	5.26914e-19	0.158847	0.0176884	922	4.85815e-16	9.03312e-14	LncRNA	AL591686.2	Positive
Ast	ENSG00000224525	rs2840605	-53298	-60570	0.416087	1616	2033	7.50142e-256	0.878795	0.0227087	5.59054e-12	-0.172286	0.0248821	9.30564e-21	0.212954	0.0225853	879	8.17966e-18	2.70383e-15	LncRNA	AL591686.1	Positive
Ast	BrainMetalnc.7303	rs6669104	91773	69543	0.362669	1429	1772	2.66833e-05	0.121931	0.0289754	0.000137602	-0.11422	0.0299121	1.40141e-06	0.140098	0.0289648	602	0.000843648	0.0129852	LncRNA	CEP170	Positive
Ast	BrainMetalnc.7333	rs525234	-493383	-501157	0.316824	1294	1548	0.0411738	-0.062043	0.0303707	0.00147193	0.0878504	0.027593	1.62068e-06	-0.143484	0.0298454	832	0.00134841	0.0190119	LncRNA	ADSS2	Positive
Ast	BrainMetalnc.44810	rs127903	111954	-107786	0.335858	1365	1641	1.94546e-64	-0.496283	0.0284194	3.08484e-06	0.123263	0.0263609	1.87132e-06	-0.136163	0.0284951	1344	0.00251505	0.0321621	LncRNA	SIRPA	Positive
Ast	ENSG00000286288	rs127903	77042	-11685	0.335858	1365	1641	1.56433e-275	-0.944995	0.0232888	1.94601e-08	0.121738	0.0216019	3.40142e-08	-0.129299	0.0233508	1272	4.32661e-05	0.00110656	LncRNA	AL109809.4	Positive
Ast	ENSG00000125821	rs6112033	-7994	-186696	0.390708	1530	1909	1.56583e-60	-0.463024	0.0274341	9.99255e-05	0.112638	0.0289022	7.67726e-09	-0.159111	0.0274528	809	6.2109e-06	0.000218417	PCG	DTD1	Positive
Ast	BrainMetalnc.45503	rs6107105	168717	73760	0.301269	1256	1472	2.51578e-116	-0.673617	0.0278101	9.80352e-11	0.160353	0.0246755	6.46652e-19	-0.246749	0.0275482	234	1.51316e-16	6.38555e-14	LncRNA		Positive
Ast	BrainMetalnc.45724	rs6120750	17154	9214	0.401555	1570	1962	1.55344e-18	-0.251584	0.0284063	1.98487e-10	0.200344	0.0313545	2.60487e-17	-0.243321	0.0285372	240	6.25169e-15	1.05528e-12	LncRNA	GGT7	Positive
Ast	ENSG00000183798	rs6065338	-971	-7206	0.180516	799	882	0.00308624	-0.108595	0.0366631	0.000281376	0.0885815	0.0243546	6.08764e-11	-0.247904	0.0377267	642	3.90826e-08	2.74881e-06	PCG	EMILIN3	Positive
Ast	BrainMetalnc.46031	rs1569548	14123	-13337	0.308023	1280	1505	4.30124e-28	-0.337433	0.030323	0.000429932	0.0943058	0.0267471	7.55472e-07	-0.145618	0.0293615	729	0.000550739	0.00968383	LncRNA	PTPRT	Positive
Ast	ENSG00000124140	rs9074	37183	-124	0.271388	1144	1326	1.25508e-37	0.401746	0.0308059	1.39893e-05	-0.113177	0.0260004	1.54844e-10	0.199638	0.0310568	626	9.69325e-08	5.84364e-06	PCG	SLC12A5	Positive
Ast	ENSG00000158296	rs2745733	20655	-97597	0.107245	501	524	3.90451e-79	0.844518	0.0432129	0.00194958	-0.065272	0.0210475	5.65026e-09	0.246871	0.0422166	672	3.79697e-06	0.000160232	PCG	SLC13A3	Positive
Ast	BrainMetalnc.46249	rs6095406	87332	83878	0.0816619	385	399	1.72233e-16	0.430095	0.0518278	0.0188677	-0.0513014	0.0218331	2.96133e-08	0.279467	0.0502477	584	1.72942e-05	0.000486543	LncRNA	ARFGEF2	Positive
Ast	ENSG00000124205	rs197178	22769	-2780	0.198117	868	968	1.41349e-29	0.396587	0.0346548	0.0281895	-0.0524526	0.0238861	1.80685e-06	0.168935	0.0353008	922	0.00166591	0.0234338	PCG	EDN3	Positive
Ast	ENSG00000101204	rs3827020	6416	-28762	0.174376	770	852	2.77243e-51	0.546574	0.0354378	0.000154514	-0.0879091	0.0231972	3.09072e-07	0.179901	0.0350539	1205	0.000372432	0.00713873	PCG	CHRNA4	Positive
Ast	ENSG00000180104	rs57433159	-24565	-51377	0.336472	1363	1644	9.4672e-63	-0.485457	0.0282047	6.10299e-08	0.146568	0.0269791	1.70503e-13	-0.210912	0.0284551	759	1.29412e-10	1.10777e-08	PCG	EXOC3	Positive
Ast	BrainMetalnc.58671	rs11747879	16684	9131	0.278142	1174	1359	3.9546e-09	-0.18726	0.0316978	0.000584906	0.0943392	0.0273999	7.91174e-07	-0.163071	0.0329409	760	0.000601293	0.00865053	LncRNA	SLC9A3	Positive
Ast	BrainMetalnc.58715	rs7734433	49903	-41163	0.377405	1496	1844	0	-0.965025	0.0218773	2.2909e-09	0.135431	0.0225784	7.00023e-18	-0.188984	0.021768	1351	9.4573e-15	1.79899e-12	LncRNA		Positive
Ast	ENSG00000188002	rs7734433	-4979	-40064	0.377405	1496	1844	0	-0.986453	0.0216165	7.65314e-06	0.100042	0.0223092	4.20129e-11	-0.142537	0.0215085	1371	5.75997e-08	2.81745e-06	Other	-	Positive
Ast	BrainMetalnc.58743	rs57533412	13557	7316	0.274662	1148	1342	1.32392e-124	0.706067	0.028035	7.60223e-06	-0.105996	0.0236294	1.46245e-11	0.187492	0.0276376	1455	2.12786e-08	1.13841e-06	LncRNA		Positive
Ast	BrainMetalnc.58815	rs10223220	-465	-3303	0.417724	1601	2041	1.31983e-79	0.515163	0.0262742	6.15022e-13	-0.211477	0.0292247	4.87831e-21	0.253409	0.0266778	843	4.11241e-18	1.00578e-15	LncRNA	ADAMTS16	Positive
Ast	BrainMetalnc.58896	rs4702501	6925	3729	0.442898	1686	2164	0.000595898	0.0981157	0.0285388	1.2365e-05	-0.14098	0.0321867	1.92531e-10	0.182761	0.0285815	704	1.35542e-07	6.27156e-06	LncRNA	ADCY2	Positive
Ast	ENSG00000246214	rs26758	65270	-674	0.314982	1288	1539	1.32903e-68	0.516139	0.0285623	0.00267996	-0.0777138	0.0258587	2.91534e-07	0.147738	0.0287247	698	0.000203491	0.00348376	LncRNA	AC024588.1	Positive
Ast	BrainMetalnc.59136	rs2288435	3524	-97341	0.314777	1288	1538	5.15753e-91	0.590965	0.0279903	0.00368185	-0.0736435	0.025333	4.14084e-07	0.143161	0.0282022	714	0.000295656	0.00486695	LncRNA	MYO10	Positive
Ast	ENSG00000183666	rs1496458	219887	-27652	0.432255	1650	2112	0.00207746	0.088185	0.0286107	1.80768e-05	-0.136873	0.0318609	1.58672e-06	0.137553	0.0285862	363	0.000575978	0.00837549	Other	-	Positive
Ast	BrainMetalnc.59380	rs13171366	69052	58107	0.345477	1402	1688	9.04136e-08	-0.160163	0.0298743	2.04816e-05	0.126894	0.0297319	7.65605e-09	-0.174929	0.0301796	844	6.4617e-06	0.000208725	LncRNA	ZFR	Positive
Ast	BrainMetalnc.59421	rs1854044	117904	-24815	0.410765	1596	2007	3.63291e-62	-0.469812	0.0274352	0.00437434	0.0836586	0.0293283	1.06386e-06	-0.13415	0.0274229	604	0.000642572	0.00916737	LncRNA		Positive
Ast	ENSG00000152582	rs74955177	95464	-101303	0.0542366	258	265	0.0018663	0.195698	0.062842	0.089509	-0.0361814	0.0212998	2.99432e-06	0.295467	0.0631049	655	0.00196128	0.0220894	PCG	SPEF2	Positive
Ast	ENSG00000172262	rs6884303	85116	-39324	0.284896	1185	1392	0.00632118	-0.0852026	0.0311754	0.000194894	0.101687	0.0272529	3.83871e-10	-0.197878	0.0314775	305	1.17081e-07	5.56784e-06	PCG	ZNF131	Positive
Ast	BrainMetalnc.59689	rs4613718	-170584	-173224	0.396848	1547	1939	4.00619e-28	0.314679	0.0282614	0.000841606	-0.0989592	0.0296028	1.36261e-05	0.124225	0.0285004	218	0.00297049	0.0299145	LncRNA	MRPS30	Positive
Ast	ENSG00000068796	rs10079618	324533	239670	0.489153	1788	2390	0.002574	-0.0846872	0.0280642	0.000315031	0.121538	0.0336876	2.63335e-06	-0.129678	0.0275404	419	0.00110337	0.0139924	PCG	KIF2A	Positive
Ast	ENSG00000164197	rs10074537	251337	44311	0.410765	1601	2007	3.50632e-23	-0.286028	0.0285485	0.000121881	0.116668	0.0303151	5.87386e-06	-0.131921	0.0290518	390	0.00229081	0.0245116	PCG	RNF180	Positive
Ast	ENSG00000237075	rs28478097	526569	523039	0.408309	1563	1995	1.13464e-203	0.791609	0.0235646	8.66908e-05	-0.098861	0.0251445	5.66242e-05	0.0957149	0.0237296	33	0.0018686	0.0211857	Other	-	Positive
Ast	BrainMetalnc.60324	rs12657096	309359	233413	0.141629	638	692	2.68119e-18	0.350987	0.0399139	0.0081246	-0.0596314	0.0225107	2.73114e-06	0.188196	0.0400319	484	0.00132187	0.015937	LncRNA	TNPO1	Positive
Ast	BrainMetalnc.60377	rs7715713	125554	-200786	0.381498	1497	1864	3.0973e-22	0.278971	0.0284882	2.70963e-05	-0.122166	0.0290552	2.27141e-06	0.133063	0.0280783	713	0.00161952	0.0189905	LncRNA		Positive
Ast	BrainMetalnc.60695	rs6882729	368501	361687	0.223496	953	1092	1.04141e-25	0.347964	0.0328187	0.0143547	-0.05944	0.024261	7.98587e-06	0.14434	0.0322535	271	0.00216417	0.0234497	LncRNA		Positive
Ast	BrainMetalnc.60887	rs1423269	12614	9866	0.25481	1091	1245	1.60224e-66	0.544878	0.0306646	7.0356e-08	-0.132897	0.0245792	1.29266e-16	0.261184	0.0313414	548	7.08377e-14	1.01062e-11	LncRNA	ELL2	Positive
Ast	BrainMetalnc.60938	rs1191323756	102683	-2450	0.410356	1612	2005	0	1.11964	0.0186306	3.62768e-12	-0.139516	0.0199701	3.66168e-17	0.158108	0.0186322	468	1.71367e-14	2.66709e-12	LncRNA	ERAP2	Positive
Ast	ENSG00000164209	rs1422488	-89761	-116785	0.0927139	431	453	0.0301998	-0.106321	0.0490248	0.0622774	0.0408025	0.021876	5.89302e-06	-0.231673	0.051027	577	0.00340027	0.0328813	PCG	SLC25A46	Positive
Ast	ENSG00000152495	rs62376849	2979	-268254	0.253786	1070	1240	5.4771e-21	-0.299566	0.0315786	2.37985e-05	0.10669	0.0251979	2.94873e-13	-0.237515	0.0323701	583	1.71911e-10	1.33778e-08	PCG	CAMK4	Positive
Ast	ENSG00000172795	rs13183347	25560	-19836	0.488948	1783	2389	0.0276463	-0.0613334	0.0278334	1.39023e-08	0.191607	0.0336509	4.85584e-13	-0.199114	0.0273925	614	2.98149e-10	2.21926e-08	PCG	DCP2	Positive
Ast	ENSG00000113396	rs57310385	87306	-100756	0.330127	1351	1613	1.71697e-50	0.445263	0.029114	0.000974545	-0.0901026	0.027289	1.9021e-06	0.142284	0.0297967	440	0.000836924	0.0111071	PCG	SLC27A6	Positive
Ast	BrainMetalnc.61694	rs6874265	-11869	-31656	0.272616	1140	1332	7.10692e-28	0.342211	0.0308832	0.000792715	-0.088726	0.0264101	1.21233e-06	0.152338	0.0313075	653	0.000791652	0.0107671	LncRNA	HSPA4	Positive
Ast	ENSG00000113621	rs76968049	4704	-22560	0.0579206	269	283	7.88695e-06	0.266694	0.0595586	0.0835215	-0.036658	0.0211735	2.53855e-07	0.306605	0.0593111	598	0.000151805	0.00285594	PCG	TXNDC15	Positive
Ast	ENSG00000204967	rs13164503	-39765	-42275	0.38641	1537	1888	0.00264796	-0.0890197	0.0295845	0.00111199	0.099115	0.0303621	1.09121e-05	-0.135076	0.0306473	388	0.00423388	0.0381495	PCG	KNOWN	Positive
Ast	ENSG00000156453	rs34668177	-1876	-28032	0.262382	1123	1282	0.0465485	0.0654005	0.0328415	0.00152941	-0.0847316	0.026707	5.51266e-06	0.146945	0.0322647	686	0.00378168	0.0351809	PCG	PCDH1	Positive
Ast	ENSG00000145819	rs154785	461198	2564	0.477691	1772	2334	1.2834e-31	0.326607	0.0275229	3.30525e-07	-0.171155	0.033433	3.56869e-11	0.188358	0.028318	779	2.78001e-08	1.44224e-06	PCG	ARHGAP26	Positive
Ast	BrainMetalnc.62081	rs258778	18900	-85725	0.398485	1559	1947	1.3279e-07	-0.153271	0.0289706	0.000344494	0.109837	0.0306431	8.95689e-06	-0.127613	0.0286747	629	0.00563388	0.0461493	LncRNA	ARHGAP26	Positive
Ast	BrainMetalnc.62083	rs244468	-14	-2103	0.48158	1783	2353	5.96173e-25	0.290263	0.0278278	0.000277174	-0.123999	0.0340558	1.22129e-06	0.139183	0.0286127	583	0.00071201	0.0100741	LncRNA	ARHGAP26	Positive
Ast	ENSG00000145817	rs7704225	-9752	-22304	0.167826	748	820	1.69362e-08	0.213196	0.037669	0.00111272	-0.0772702	0.0236717	2.17259e-07	0.195381	0.0375822	395	8.58174e-05	0.00177011	PCG	YIPF5	Positive
Ast	ENSG00000251031	rs248576	-33776	-405696	0.335244	1362	1638	7.19258e-09	-0.174235	0.0300049	0.000737611	0.0954129	0.0282329	1.24141e-05	-0.131644	0.0300612	412	0.00511459	0.0433474	LncRNA	AC132803.1	Positive
Ast	ENSG00000133706	rs17796852	-35897	-108027	0.282849	1165	1382	1.50467e-77	0.542094	0.0280489	3.27928e-17	-0.19864	0.0233722	3.56043e-41	0.388993	0.0284074	451	1.60576e-38	2.74905e-35	PCG	LARS1	Positive
Ast	ENSG00000173210	rs4490572	91276	-27783	0.443717	1674	2168	6.24505e-194	-0.765171	0.0234628	3.87579e-12	0.18971	0.0271915	7.92092e-24	-0.246758	0.0242608	668	5.29118e-21	1.8117e-18	PCG	ABLIM3	Positive
Ast	BrainMetalnc.62296	rs74824261	54451	48956	0.24519	1056	1198	6.1004e-29	-0.366435	0.0324004	9.69333e-05	0.0996734	0.025527	1.90801e-08	-0.180911	0.0320822	731	1.39475e-05	0.000390282	LncRNA	CSNK1A1	Positive
Ast	ENSG00000011083	rs72837566	16857	-15869	0.250307	1066	1223	7.23698e-06	-0.146322	0.0325424	7.59123e-05	0.101534	0.0256158	4.67851e-09	-0.190216	0.0323525	801	3.74748e-06	0.00013366	PCG	SLC6A7	Positive
Ast	ENSG00000213433	rs2915878	4242	3723	0.224314	979	1096	2.63775e-76	-0.614637	0.0320862	0.00998277	0.0608718	0.023608	2.39465e-06	-0.149379	0.0315934	551	0.00131945	0.015937	Other	-	Positive
Ast	ENSG00000155508	rs13153640	25286	6047	0.0920999	430	450	1.38845e-38	-0.628606	0.0475508	0.0205393	0.0490391	0.0211571	4.15315e-10	-0.304167	0.0484813	566	2.35068e-07	1.05905e-05	PCG	CNOT8	Positive
Ast	ENSG00000118322	rs6895429	310573	21479	0.171306	757	837	3.36839e-243	1.11143	0.0296543	5.20284e-08	-0.104178	0.0190754	2.6317e-14	0.214268	0.0279668	667	1.75534e-11	1.66952e-09	PCG	ATP10B	Positive
Ast	ENSG00000145864	rs252947	442	-260172	0.333606	1382	1630	0.004535	0.0870878	0.0306543	5.14454e-09	-0.170552	0.0290869	2.37677e-14	0.239868	0.0312534	570	1.35476e-11	1.36432e-09	PCG	GABRB2	Positive
Ast	BrainMetalnc.63004	rs601923	27270	11984	0.492223	1820	2405	5.6012e-09	-0.164898	0.0281915	1.26197e-12	0.24296	0.0340472	3.76613e-17	-0.234967	0.0277005	446	1.67969e-14	2.66709e-12	LncRNA	UIMC1	Positive
Ast	ENSG00000184840	rs6634	3894	-1145	0.45702	1730	2233	7.18639e-11	-0.186535	0.0284967	1.67092e-05	0.1404	0.032549	3.3115e-08	-0.159933	0.0288584	719	2.38097e-05	0.000617609	PCG	TMED9	Positive
Ast	BrainMetalnc.63047	rs62398510	-28696	-45748	0.320303	1315	1565	2.16291e-185	0.814731	0.025667	8.34272e-05	-0.0935262	0.0237317	3.07053e-09	0.154178	0.0259131	702	2.15551e-06	8.20052e-05	LncRNA	FAM153A	Positive
Ast	BrainMetalnc.63128	rs9329083	37297	-14499	0.401555	1580	1962	2.6753e-20	-0.268255	0.028803	1.66659e-05	0.130751	0.030308	3.92885e-09	-0.171601	0.0290419	1108	4.35316e-06	0.000152094	LncRNA	RUFY1	Positive
Ast	BrainMetalnc.63145	rs565280	-2129	-3795	0.455792	1700	2227	1.93687e-07	-0.146247	0.028015	0.00021099	0.120866	0.032569	3.08937e-06	-0.132801	0.0284023	1086	0.00335506	0.0326356	LncRNA	SQSTM1	Positive
Ast	ENSG00000197226	rs152234	45994	163	0.0933279	433	456	1.05315e-157	-1.20905	0.0419109	2.50865e-06	0.0895449	0.0189769	1.96895e-12	-0.309448	0.043749	1101	2.16781e-09	1.42742e-07	PCG	TBC1D9B	Positive
Ast	BrainMetalnc.38655	rs35703087	70534	66899	0.282849	1181	1382	2.79338e-79	-0.5719	0.0292338	4.80608e-06	0.113593	0.0247837	1.0567e-06	-0.141623	0.0289427	682	0.00072067	0.012382	LncRNA		Positive
Ast	ENSG00000196208	rs3762577	128794	-31653	0.242325	1045	1184	2.80258e-74	-0.589449	0.0312294	4.90642e-06	0.110081	0.0240403	7.46996e-09	-0.181941	0.0313667	1092	8.1572e-06	0.000278432	PCG	GREB1	Positive
Ast	ENSG00000178295	rs12474069	-7850	-42938	0.477282	1770	2332	3.46591e-46	0.396701	0.0272226	5.24602e-07	-0.165761	0.0329507	1.3937e-08	0.154591	0.0271521	578	8.05557e-06	0.000278432	PCG	GEN1	Positive
Ast	ENSG00000170745	rs35165301	214298	-269470	0.269136	1137	1315	3.80171e-19	0.285048	0.0316111	0.000776989	-0.0884786	0.026293	2.13983e-06	0.152868	0.0321748	684	0.00146364	0.0208162	PCG	KCNS3	Positive
Ast	ENSG00000138031	rs17046742	123787	22719	0.121367	556	593	2.25662e-15	-0.342571	0.0429368	0.0281864	0.0489294	0.0222812	2.04742e-08	-0.24352	0.0432798	385	7.88257e-06	0.00027643	PCG	ADCY3	Positive
Ast	ENSG00000157851	rs12713992	-3556	-106116	0.406877	1596	1988	5.25419e-213	-0.824995	0.0238966	6.39463e-08	0.141761	0.0261349	4.81758e-15	-0.19213	0.0243762	357	1.71988e-12	2.93525e-10	PCG	DPYSL5	Positive
Ast	ENSG00000213639	rs11679568	-127036	-178253	0.392141	1529	1916	4.04819e-13	-0.208146	0.0285366	7.03666e-06	0.13587	0.0301776	1.04627e-08	-0.164817	0.0286993	698	7.30297e-06	0.000259661	PCG	PPP1CB	Positive
Ast	ENSG00000179270	rs10194257	3387	-10160	0.293696	1217	1435	5.51902e-79	-0.562337	0.0288042	9.11679e-06	0.109844	0.0247031	1.60752e-10	-0.188005	0.0292735	777	1.24904e-07	6.66155e-06	PCG	PCARE	Positive
Ast	ENSG00000115295	rs12620307	-32462	-124400	0.29431	1220	1438	1.77181e-20	-0.284211	0.0303688	1.03158e-05	0.115264	0.0260795	2.19188e-12	-0.217836	0.0308634	788	1.7272e-09	1.63764e-07	PCG	CLIP4	Positive
Ast	ENSG00000218739	rs10779921	16724	-2927	0.397871	1591	1944	0.0310924	0.0641356	0.0297318	3.88378e-10	-0.196217	0.0312225	7.03189e-15	0.233985	0.0298705	912	6.41308e-12	9.65735e-10	PCG	CEBPZOS	Positive
Ast	ENSG00000152527	rs6544677	-3026	-133753	0.402374	1563	1966	0.0143359	-0.0703975	0.0287279	1.39854e-07	0.167854	0.0317846	1.00956e-10	-0.189642	0.0292027	876	8.84375e-08	5.03111e-06	PCG	PLEKHH2	Positive
Ast	BrainMetalnc.39750	rs111650801	81364	39577	0.0890299	404	435	1.37922e-05	0.211782	0.0486182	0.00433108	-0.0620239	0.0217197	6.33189e-10	0.300035	0.0483391	1234	7.81355e-07	3.7042e-05	LncRNA	SOCS5	Positive
Ast	ENSG00000170634	rs10208233	95439	-238867	0.463569	1752	2265	1.33783e-11	0.19376	0.0285066	5.8859e-07	-0.167757	0.0334963	8.1623e-10	0.176497	0.0286233	903	7.37056e-07	3.56012e-05	PCG	ACYP2	Positive
Ast	ENSG00000115306	rs843670	-120350	-335479	0.310274	1291	1516	1.76386e-09	0.1861	0.030805	6.07652e-06	-0.12438	0.0274348	2.16673e-09	0.183144	0.0304862	721	1.56221e-06	6.77841e-05	PCG	SPTBN1	Positive
Ast	BrainMetalnc.40019	rs11125770	59255	35120	0.323578	1331	1581	0.00156457	0.0968027	0.0305757	0.000951992	-0.0956598	0.0289144	7.44026e-06	0.140052	0.0311893	651	0.00484361	0.0492049	LncRNA		Positive
Ast	BrainMetalnc.40226	rs2723071	106513	-10383	0.137331	629	671	0.0105103	-0.10631	0.0415183	3.9221e-05	0.094516	0.0229431	3.98496e-09	-0.252802	0.0428016	677	2.69782e-06	0.000111394	LncRNA		Positive
Ast	ENSG00000204792	rs12366	40581	20311	0.409537	1593	2001	0	1.18751	0.0164505	5.8392e-05	-0.0682839	0.0169595	1.79371e-07	0.0838988	0.0160275	591	0.000106008	0.00251278	LncRNA	LINC01291	Positive
Ast	ENSG00000115602	rs12712140	23100	-17435	0.472165	1768	2307	5.27584e-286	-0.911517	0.0219273	1.23702e-12	0.179873	0.0251967	3.22604e-11	-0.144868	0.0217303	451	1.45495e-08	1.06419e-06	PCG	IL1RL1	Positive
Ast	ENSG00000115604	rs66780767	-32547	-75528	0.265862	1088	1299	1.10849e-91	-0.628619	0.0296532	1.02026e-15	0.190925	0.0236338	5.42436e-07	-0.151271	0.0301091	449	0.000243554	0.00498798	PCG	IL18R1	Positive
Ast	BrainMetalnc.41542	rs10153558	20173	16616	0.228612	1002	1117	6.0991e-19	-0.303772	0.0338893	0.00255934	0.0746661	0.0247291	1.71345e-06	-0.167612	0.0349459	492	0.000843017	0.013746	LncRNA	TTL	Positive
Ast	ENSG00000163161	rs4150476	17956	-18920	0.279165	1180	1364	1.4795e-51	-0.471138	0.030459	0.00135166	0.0815753	0.0254249	1.11968e-08	-0.17764	0.0309949	516	5.77753e-06	0.000211292	PCG	ERCC3	Positive
Ast	ENSG00000225449	rs12621328	28683	15610	0.431641	1640	2109	1.00922e-158	-0.712155	0.0245936	0.00247029	0.0814809	0.0268904	9.54389e-06	-0.107837	0.0243062	369	0.0035217	0.0388601	Other	-	Positive
Ast	ENSG00000222014	rs10928946	-4953	-7224	0.309456	1269	1512	4.16078e-222	-0.879492	0.0248286	0.000737176	0.0751744	0.0222432	1.14816e-07	-0.131956	0.0248158	371	4.25966e-05	0.00118356	PCG	RAB6C	Positive
Ast	ENSG00000287151	rs9711982	144366	103802	0.197094	854	963	0.0155177	-0.0850479	0.0351181	0.0136526	0.0604604	0.0244971	1.21449e-07	-0.188844	0.0355835	413	5.01583e-05	0.00132377	LncRNA	C2orf27A	Positive
Ast	ENSG00000163046	rs188040994	20890	-89488	0.237413	1012	1160	2.19187e-11	-0.221326	0.0329149	0.121192	0.0403369	0.0260183	6.9426e-06	-0.133959	0.0297341	513	0.00356155	0.0391312	PCG	ANKRD30BL	Positive
Ast	ENSG00000231758	rs1035271	274220	247174	0.483013	1785	2360	3.51644e-34	0.34138	0.0275767	2.5303e-05	-0.144469	0.034233	3.91445e-06	0.130414	0.0281889	420	0.00164407	0.0226039	LncRNA	ARHGAP15-AS1	Positive
Ast	ENSG00000213197	rs56148718	-193801	-194494	0.498772	1830	2437	2.27226e-09	-0.169534	0.0282574	1.17914e-06	0.164734	0.0338166	2.03901e-09	-0.170419	0.0283209	434	8.84929e-07	4.11894e-05	Other	-	Positive
Ast	BrainMetalnc.42414	rs7596632	6714	-150277	0.466435	1728	2279	7.60203e-54	-0.424021	0.0267741	9.64491e-06	0.137982	0.0311167	2.40205e-08	-0.149714	0.026741	482	1.15779e-05	0.000384927	LncRNA	KCNJ3	Positive
Ast	BrainMetalnc.42559	rs1227932	-44867	-63892	0.401351	1557	1961	3.32305e-26	-0.301759	0.0281654	0.000291192	0.109252	0.0301113	7.07296e-08	-0.155192	0.0287076	285	2.01579e-05	0.000607109	LncRNA	SLC4A10	Positive
Ast	ENSG00000138399	rs7349274	1276	-44091	0.0767499	365	375	0.00912092	0.141288	0.0541422	0.0655106	-0.0397332	0.0215638	2.88619e-07	0.29841	0.0579986	728	0.000210115	0.00438367	PCG	FASTKD1	Positive
Ast	BrainMetalnc.42707	rs1045373	22574	-1511	0.273434	1157	1336	3.95585e-66	-0.535168	0.0302157	0.00342101	0.0757805	0.0258636	3.15265e-06	-0.137673	0.0294709	745	0.00234872	0.0287691	LncRNA	KLHL23	Positive
Ast	BrainMetalnc.42723	rs2883387	-110777	-163228	0.136512	616	667	8.27411e-24	-0.409246	0.0402539	0.0293238	0.0487784	0.0223714	6.03594e-08	-0.230401	0.042395	720	4.34588e-05	0.00118356	LncRNA	UBR3	Positive
Ast	ENSG00000234350	rs34002163	51294	-62008	0.311912	1284	1524	0.016258	0.0737627	0.0306739	0.00100279	-0.0917192	0.0278466	9.98613e-07	0.151486	0.0308874	671	0.000670069	0.0118302	LncRNA	AC007405.1	Positive
Ast	ENSG00000204335	rs4668314	59411	56670	0.387843	1530	1895	7.15036e-06	-0.131201	0.0291629	0.000238145	0.111593	0.0303228	2.9231e-07	-0.150218	0.0292098	671	0.00019614	0.00421948	PCG	SP5	Positive
Ast	BrainMetalnc.42855	rs35155300	-4917	-5585	0.262178	1121	1281	2.28046e-10	0.205622	0.0322897	1.50522e-05	-0.113022	0.0260619	1.56424e-10	0.207866	0.0323446	598	9.35416e-08	5.20579e-06	LncRNA	SCRN3	Positive
Ast	ENSG00000163328	rs7569879	14600	-40923	0.213467	920	1043	1.50281e-29	0.382382	0.0334299	0.000574723	-0.0851051	0.0246838	5.09819e-07	0.170578	0.033871	573	0.000292126	0.00584252	PCG	GPR155	Positive
Ast	BrainMetalnc.42900	rs9646792	-34662	-41330	0.419157	1626	2048	3.43116e-21	-0.272028	0.028524	0.000168607	0.1159	0.0307609	1.10182e-06	-0.135828	0.0278055	559	0.000615916	0.0111038	LncRNA		Positive
Ast	BrainMetalnc.42945	rs7563082	23271	6743	0.22411	973	1095	7.64664e-07	-0.167991	0.033889	0.000102278	0.0975615	0.0250701	2.00536e-12	-0.237763	0.0336266	483	9.6859e-10	1.03316e-07	LncRNA	NFE2L2	Positive
Ast	ENSG00000233654	rs13410179	-80520	-115441	0.175808	779	859	1.0255e-13	-0.275269	0.0367971	0.0380544	0.0489909	0.0236056	4.47796e-06	-0.165864	0.036071	417	0.00186731	0.0244033	LncRNA	AC108047.1	Positive
Ast	ENSG00000118997	rs4850675	427660	96526	0.406877	1596	1988	2.2113e-91	0.566142	0.0267547	5.62046e-06	-0.127381	0.0279941	1.69748e-15	0.206883	0.0258136	427	7.24826e-13	1.3254e-10	PCG	DNAH7	Positive
Ast	ENSG00000178074	rs7563901	110475	66376	0.180516	807	882	0.000419818	-0.13136	0.0371897	0.00252858	0.0725768	0.0240079	7.86759e-07	-0.187512	0.0378697	394	0.000309983	0.0061516	PCG	C2orf69	Positive
Ast	ENSG00000118246	rs35535884	23104	-7728	0.240892	1014	1177	0.000221746	-0.119948	0.0324323	0.00101731	0.0837422	0.0254561	1.10584e-07	-0.177508	0.0333391	632	6.98891e-05	0.00173705	PCG	FASTKD2	Positive
Ast	ENSG00000036257	rs111915841	132973	17726	0.324396	1340	1585	0.0107396	0.0783194	0.0306771	3.71852e-05	-0.115327	0.027911	6.16376e-09	0.182384	0.0312674	478	2.94628e-06	0.000116979	PCG	CUL3	Positive
Ast	ENSG00000144468	rs3731593	73627	-90007	0.411789	1583	2012	3.3744e-16	-0.231956	0.0282324	4.18269e-05	0.123478	0.0300825	6.49269e-07	-0.138801	0.0278207	635	0.000412286	0.00781816	PCG	RHBDD1	Positive
Ast	BrainMetalnc.44397	rs1446310	-57020	-57432	0.382931	1508	1871	3.86627e-130	-0.667878	0.0258695	2.33741e-05	0.113197	0.026709	4.15815e-07	-0.131414	0.0258922	698	0.000290239	0.00584252	LncRNA	SNORC	Positive
Ast	ENSG00000085978	rs7563345	24547	-61076	0.346091	1407	1691	1.1275e-06	0.146586	0.0300362	0.000156286	-0.108095	0.0285453	1.54976e-06	0.146586	0.0304334	825	0.00127855	0.0187291	PCG	ATG16L1	Positive
Ast	BrainMetalnc.44568	rs10193548	9109	4110	0.437986	1686	2140	0.000649777	-0.0987501	0.028922	1.23919e-06	0.157938	0.0324877	6.36147e-10	-0.178426	0.0287499	1065	6.77496e-07	3.33537e-05	LncRNA	HDAC4	Positive
Ast	ENSG00000172428	rs35905059	595	-9649	0.219402	939	1072	0.000469628	-0.117523	0.0335563	1.87677e-05	0.106057	0.0247359	3.88535e-12	-0.235282	0.0337253	1147	4.4565e-09	3.6802e-07	PCG	COPS9	Positive
Ast	BrainMetalnc.44722	rs62193092	8140	-2760	0.332378	1343	1624	1.5272e-272	0.933761	0.0231742	4.64683e-05	-0.0889028	0.0217895	4.29278e-12	0.162341	0.0233178	515	2.21078e-09	1.95159e-07	LncRNA	NEU4	Positive
Ast	ENSG00000224272	rs62193092	2190	-1420	0.332378	1343	1624	0	1.00041	0.0220609	0.000362425	-0.0740733	0.0207427	1.71559e-10	0.142337	0.0221975	508	8.71522e-08	5.03111e-06	LncRNA	ENSG00000224272	Positive
Ast	BrainMetalnc.44731	rs139457691	215567	55638	0.114409	519	559	1.96307e-14	-0.336349	0.0436817	0.00439752	0.0641367	0.0224977	9.38717e-06	-0.185265	0.0417243	481	0.00451523	0.0464216	LncRNA		Positive
Ast	ENSG00000237940	rs139457691	126199	119606	0.114409	519	559	2.51688e-13	-0.321794	0.0437272	0.0053737	0.0627493	0.0225212	8.46143e-06	-0.186397	0.0417678	446	0.0037738	0.0400868	LncRNA	LINC01238	Positive
Ast	BrainMetalnc.19081	rs9506954	-128	-35745	0.423045	1621	2067	0.000138303	-0.108823	0.0285081	3.04506e-05	0.131633	0.0315066	6.46842e-08	-0.15481	0.0285516	1218	7.87853e-05	0.00142774	LncRNA		Positive
Ast	BrainMetalnc.19219	rs11619784	-11768	-13763	0.2763	1170	1350	4.20429e-39	0.412607	0.0309865	0.000514066	-0.0910913	0.0261909	2.07545e-08	0.171294	0.0304563	826	1.71432e-05	0.000398044	LncRNA	MTIF3	Positive
Ast	BrainMetalnc.19267	rs1491236897	12977	-38663	0.339746	1383	1660	2.53024e-112	0.640815	0.0269841	1.59506e-08	-0.143327	0.0252775	1.90428e-17	0.224684	0.0262368	744	1.41678e-14	5.26334e-12	LncRNA		Positive
Ast	ENSG00000133103	rs9548884	36300	-99738	0.328899	1349	1607	6.30507e-05	-0.121407	0.0302906	1.94164e-06	0.133926	0.0280711	1.38972e-11	-0.205998	0.030332	702	9.75583e-09	6.04049e-07	PCG	COG6	Positive
Ast	ENSG00000102743	rs7337312	-10251	-33147	0.486287	1779	2376	3.51836e-32	-0.326485	0.0272507	1.8868e-06	0.162068	0.0339283	2.3741e-08	-0.152834	0.0272883	647	1.53604e-05	0.000368155	PCG	SLC25A15	Positive
Ast	BrainMetalnc.19656	rs4942256	41221	27730	0.469914	1739	2296	2.00919e-128	-0.63988	0.0249736	8.11374e-06	0.133373	0.0298258	8.13146e-08	-0.137595	0.0255725	576	4.68372e-05	0.000940542	LncRNA	CCDC122	Positive
Ast	ENSG00000235903	rs17600984	48819	-59800	0.258084	1093	1261	1.00131e-47	0.460101	0.0310173	0.000249568	-0.0931147	0.0253848	4.14907e-08	0.175434	0.031886	621	2.57657e-05	0.000531776	LncRNA	CPB2-AS1	Positive
Ast	BrainMetalnc.19742	rs17600984	48781	-59703	0.258084	1093	1261	1.23996e-18	0.282561	0.0318108	3.01278e-05	-0.108833	0.0260343	1.00644e-09	0.200543	0.0327018	621	6.25e-07	2.32188e-05	LncRNA	CPB2	Positive
Ast	BrainMetalnc.19757	rs2476676	23452	21809	0.131805	592	644	1.37825e-11	0.278216	0.0409583	0.00346019	-0.0666888	0.0227883	2.26153e-08	0.219293	0.0390949	620	1.40215e-05	0.000347265	LncRNA	RUBCNL	Positive
Ast	ENSG00000102547	rs7985932	28741	-106673	0.231273	1000	1130	3.1928e-74	0.588109	0.0311714	1.39752e-10	-0.153244	0.0237809	1.82688e-23	0.310929	0.0308281	437	7.98347e-21	5.93172e-18	PCG	CAB39L	Positive
Ast	BrainMetalnc.19879	rs1325660	-513332	-693266	0.417519	1586	2040	0.000417263	-0.0996602	0.0282021	0.0012132	0.0991523	0.0306067	8.10026e-06	-0.126358	0.0282547	542	0.00439034	0.0388336	LncRNA		Positive
Ast	ENSG00000231607	rs1063181	-20405	-189455	0.142243	650	695	9.78145e-36	0.505898	0.039892	0.0104131	-0.0579062	0.0225862	6.07535e-06	0.183862	0.0405542	537	0.00326246	0.031146	LncRNA	DLEU2	Positive
Ast	ENSG00000136111	rs2297203	26651	-172015	0.409333	1596	2000	3.97154e-41	0.384068	0.0280653	0.000120077	-0.116874	0.0303395	7.07495e-06	0.125725	0.0279316	695	0.00491709	0.0429811	PCG	TBC1D4	Positive
Ast	ENSG00000134897	rs9518844	15791	-26623	0.491404	1802	2401	4.7079e-13	-0.202574	0.0278521	3.47089e-08	0.186954	0.0337847	8.72541e-12	-0.189292	0.0275954	716	6.2474e-09	4.21983e-07	PCG	BIVM	Positive
Ast	BrainMetalnc.20901	rs4773111	48631	-36262	0.487515	1789	2382	1.22687e-49	0.409529	0.0270263	0.000339621	-0.117895	0.0328569	5.69061e-07	0.138589	0.027636	1176	0.000669216	0.00956206	LncRNA		Positive
Ast	ENSG00000275830	rs4773111	36550	-104489	0.487515	1789	2382	7.73141e-40	0.367028	0.0272868	0.00115029	-0.107973	0.0331735	3.46964e-06	0.129791	0.0279024	1187	0.00411846	0.037778	LncRNA	AL390755.1	Positive
Ast	ENSG00000276269	rs1335807	-2504	-2970	0.471347	1741	2303	3.78819e-61	-0.451787	0.026621	4.38044e-05	0.130994	0.0319978	1.75584e-06	-0.128804	0.0268824	1135	0.00199288	0.0235033	LncRNA	AL355974.2	Positive
Ast	ENSG00000224243	rs1977285	-78087	-129257	0.323782	1332	1582	9.50427e-80	0.555214	0.028289	2.11676e-09	-0.158335	0.0263396	1.07007e-16	0.238918	0.0285907	966	1.03369e-13	1.92008e-11	LncRNA	SOX1-OT	Positive
Ast	ENSG00000182968	rs493266	-121524	-126081	0.438805	1690	2144	0.000184879	0.108779	0.0290498	0.000207919	-0.122316	0.0329265	2.60913e-06	0.138894	0.0294857	930	0.00242649	0.0264745	PCG	SOX1	Positive
Ast	BrainMetalnc.20972	rs1977285	-95166	-129408	0.323782	1332	1582	3.01864e-65	0.503771	0.0286524	8.68782e-10	-0.164234	0.0266779	2.84545e-17	0.246603	0.0289579	963	2.74017e-14	6.78648e-12	LncRNA		Positive
Ast	ENSG00000229520	rs9549667	-132784	-133571	0.480761	1791	2349	7.70757e-08	0.153346	0.0284482	1.06184e-06	-0.162715	0.0332598	1.12212e-08	0.16081	0.0280602	964	1.08172e-05	0.000287042	LncRNA	LINC00404	Positive
Ast	ENSG00000233695	rs6602912	10084	-2168	0.289398	1210	1414	1.95094e-33	0.372062	0.0304162	9.36009e-06	-0.114777	0.0258459	2.66124e-10	0.192191	0.0302953	656	1.74577e-07	7.48883e-06	LncRNA	GAS6-AS1	Positive
Ast	ENSG00000260910	rs9525182	270626	265148	0.347728	1393	1699	8.49242e-08	0.158548	0.0295101	0.00132656	-0.0922363	0.0286992	3.98662e-06	0.137078	0.0296536	584	0.00232819	0.0258186	LncRNA	LINC00565	Positive
Ast	ENSG00000177951	rs1490943206	90121	62918	0.2237	968	1093	0.000907956	0.113021	0.0340251	0.00218189	-0.0782623	0.0255129	7.07754e-06	0.154922	0.0344186	563	0.00398466	0.0459012	PCG	BET1L	Positive
Ast	BrainMetalnc.11084	rs34481144	2245	-10316	0.471756	1754	2305	1.50458e-12	0.199293	0.028025	0.000198101	-0.126075	0.0338266	1.47518e-08	0.156461	0.027528	616	9.08711e-06	0.000358234	LncRNA	IFITM3	Positive
Ast	ENSG00000255158	rs11246273	38954	26473	0.459271	1737	2244	1.3373e-29	0.322004	0.0281251	0.000197298	-0.121483	0.0325855	3.48884e-06	0.130469	0.0280551	789	0.00275269	0.0359065	LncRNA	AC131934.1	Positive
Ast	BrainMetalnc.11135	rs10902262	30729	-32089	0.404421	1563	1976	1.39329e-39	-0.371558	0.0277201	0.00261285	0.091446	0.0303498	3.37331e-06	-0.129798	0.0278688	1024	0.00345427	0.0421686	LncRNA	AP2A2	Positive
Ast	ENSG00000130592	rs4980392	11721	-29642	0.38641	1509	1888	0.000477149	-0.10095	0.0288592	7.44128e-05	0.115044	0.0289893	9.65098e-07	-0.142427	0.0290004	1194	0.00115233	0.0194688	PCG	LSP1	Positive
Ast	ENSG00000167325	rs12806698	37	-44188	0.277528	1168	1356	7.6416e-89	0.611065	0.0293322	0.000672254	-0.083121	0.0244112	7.21238e-08	0.158442	0.029328	960	6.92389e-05	0.00178014	PCG	RRM1	Positive
Ast	ENSG00000166436	rs11042032	63288	-7369	0.369423	1449	1805	1.12414e-23	0.287268	0.0283429	1.81777e-05	-0.125775	0.0292861	3.05232e-07	0.144345	0.0281128	821	0.000250595	0.0056077	PCG	TRIM66	Positive
Ast	ENSG00000175348	rs10769983	83421	66181	0.328285	1337	1604	0.000322123	0.108579	0.0301444	0.0011024	-0.0939038	0.028744	5.47149e-07	0.151721	0.0302087	769	0.000420758	0.00834509	PCG	TMEM9B	Positive
Ast	ENSG00000050165	rs11604688	-217822	-265703	0.412198	1562	2014	0.0014256	-0.0892657	0.027956	7.12139e-06	0.135277	0.0300631	2.44716e-09	-0.165579	0.0276547	1267	3.10055e-06	0.000144747	PCG	DKK3	Positive
Ast	ENSG00000109854	rs11025535	1831	-18266	0.430004	1645	2101	2.32203e-148	-0.695934	0.0249974	0.00103687	0.0913951	0.027828	6.01963e-10	-0.148635	0.0239157	1105	6.65169e-07	3.68753e-05	PCG	HTATIP2	Positive
Ast	BrainMetalnc.12206	rs7120753	73380	-31046	0.447196	1728	2185	0.00455263	-0.0834465	0.0293854	0.000122261	0.127405	0.0331113	2.35992e-07	-0.152523	0.0294263	808	0.000190682	0.00439311	LncRNA		Positive
Ast	ENSG00000246250	rs10838174	-26310	-79519	0.318256	1336	1555	1.72706e-69	0.534092	0.029349	1.00436e-06	-0.130797	0.0266752	9.47708e-16	0.239698	0.0296372	785	7.43951e-13	1.88538e-10	LncRNA	AC087521.2	Positive
Ast	ENSG00000254427	rs12418562	-3442	-15561	0.172124	769	841	1.91021e-179	0.995428	0.0319755	0.000852278	-0.0678491	0.0203178	2.34644e-06	0.153616	0.0324609	744	0.00174575	0.0266979	LncRNA	LINC02696	Positive
Ast	ENSG00000025434	rs10838681	5213	-15520	0.265043	1129	1295	5.55746e-07	0.15873	0.0316234	3.88642e-13	-0.187781	0.0257249	1.45171e-29	0.356983	0.0312007	230	3.33894e-27	5.92327e-24	PCG	NR1H3	Positive
Ast	BrainMetalnc.12375	rs1377750757	77364	70496	0.292468	1201	1429	5.84683e-21	0.286522	0.0302261	0.004331	-0.0760854	0.0266437	1.41978e-05	0.129414	0.0297528	253	0.00359204	0.042767	LncRNA	FNBP4	Positive
Ast	ENSG00000149177	rs10838910	490324	300041	0.439009	1665	2145	1.22249e-10	0.182758	0.0282706	0.000187227	-0.119033	0.0318152	4.36232e-06	0.129951	0.0282272	291	0.00126943	0.0206603	PCG	PTPRJ	Positive
Ast	BrainMetalnc.12421	rs78891217	-162129	-185825	0.0706099	321	345	3.09928e-157	-1.37776	0.0478423	0.899502	-0.00239605	0.0189706	2.04157e-06	-0.196973	0.0413742	272	0.000555307	0.0104799	LncRNA		Positive
Ast	ENSG00000134809	rs2649665	-6609	-8948	0.196889	866	962	5.03766e-157	0.885415	0.0307699	5.87205e-07	-0.103813	0.0207265	4.65146e-15	0.235996	0.0299245	355	1.65127e-12	3.25483e-10	PCG	TIMM10	Positive
Ast	ENSG00000162174	rs1919357	-52524	-108488	0.357962	1430	1749	2.96977e-07	0.150634	0.0293079	0.00828756	-0.076483	0.0289458	6.64326e-09	0.173877	0.029874	514	3.41464e-06	0.000154939	PCG	ASRGL1	Positive
Ast	ENSG00000149541	rs113222038	-2741	-9599	0.275686	1161	1347	1.8908e-32	0.372769	0.0309732	0.000176176	-0.0973324	0.0259088	8.34324e-08	0.163715	0.0304534	519	4.33014e-05	0.00129598	PCG	B3GAT3	Positive
Ast	ENSG00000175115	rs527897	63034	-111438	0.22677	988	1108	3.96733e-68	-0.57984	0.0322095	0.00148598	0.0764838	0.0240438	3.28172e-06	-0.147511	0.0316332	308	0.00101077	0.0175795	PCG	PACS1	Positive
Ast	ENSG00000174080	rs7116940	-27040	-32455	0.243758	1039	1191	4.21629e-53	0.493561	0.0314014	0.00208139	-0.0758936	0.0246274	1.18137e-09	0.189323	0.0310034	276	3.26058e-07	1.92809e-05	PCG	CTSF	Positive
Ast	ENSG00000231793	rs12804736	6254	2650	0.311502	1289	1522	1.55531e-31	-0.356561	0.0300903	0.000409181	0.0975988	0.0275782	2.4021e-06	-0.142193	0.0300776	367	0.000881571	0.0159582	Other	-	Positive
Ast	BrainMetalnc.13096	rs12270493	19574	-75677	0.39869	1582	1948	3.0506e-09	0.175229	0.0294459	0.000213134	-0.11603	0.0312874	3.15592e-07	0.153014	0.0298379	466	0.000147066	0.0034786	LncRNA	CHKA	Positive
Ast	ENSG00000132740	rs544370	-18099	-54837	0.307	1275	1500	3.7077e-160	0.775366	0.0266359	1.84578e-07	-0.123756	0.0236657	1.8446e-12	0.186881	0.0263863	638	1.17685e-09	1.22808e-07	PCG	IGHMBP2	Positive
Ast	ENSG00000241170	rs10793105	-14759	-58495	0.271797	1151	1328	1.08748e-25	-0.333317	0.0314498	0.00405124	0.0747591	0.0259862	5.97902e-08	-0.168596	0.0310128	456	2.72643e-05	0.000879398	Other	-	Positive
Ast	ENSG00000255326	rs636418	-1499	-12968	0.396439	1547	1937	3.21802e-08	0.159895	0.028825	0.000527954	-0.106249	0.0306123	8.05237e-06	0.128691	0.0287683	519	0.00417918	0.0472221	LncRNA	AP001922.5	Positive
Ast	BrainMetalnc.13708	rs1894012	9466	-42396	0.196684	858	961	1.9353e-85	-0.669681	0.0328483	0.0125724	0.0562466	0.0225211	7.05699e-06	-0.149724	0.0332592	562	0.00396603	0.0459012	LncRNA	ME3	Positive
Ast	ENSG00000256422	rs1487689	81437	-82193	0.217151	920	1061	8.54178e-17	0.277203	0.0330641	0.000148435	-0.0933229	0.0245608	9.60405e-10	0.196916	0.032071	431	4.13935e-07	2.36877e-05	LncRNA	LINC02552	Positive
Ast	BrainMetalnc.14043	rs1487689	-32954	-82121	0.217151	920	1061	2.63105e-15	0.263608	0.0331205	0.000276164	-0.0896032	0.0246028	2.66249e-09	0.191901	0.0321258	390	1.03837e-06	5.26305e-05	LncRNA		Positive
Ast	ENSG00000110675	rs631376	-27788	-103476	0.402169	1569	1965	0.00889087	-0.0759516	0.0290077	0.00362291	0.0897403	0.0308165	5.69319e-06	-0.130917	0.0287886	543	0.0030914	0.0383507	PCG	ELMOD1	Positive
Ast	ENSG00000149575	rs2155854	-6846	-20679	0.498772	1831	2437	2.52351e-05	-0.120017	0.0284348	6.1082e-05	0.140341	0.0349489	4.33848e-07	-0.145217	0.028658	727	0.000315407	0.00674135	PCG	SCN2B	Positive
Ast	ENSG00000149547	rs113010804	-620815	-636218	0.0679492	320	332	0.0186541	-0.132763	0.0563999	0.459154	0.0157712	0.0213021	1.02045e-06	-0.294203	0.0600397	902	0.000920442	0.0164936	PCG	EI24	Positive
Ast	ENSG00000063978	rs17132645	26328	-27309	0.379042	1518	1852	1.53764e-31	-0.343322	0.0289705	5.60804e-05	0.119992	0.0297316	2.48572e-07	-0.151689	0.0293208	755	0.000187672	0.00353027	PCG	RNF4	Positive
Ast	ENSG00000087266	rs231333	2172	-45855	0.239255	1049	1169	1.02223e-20	0.31599	0.0335493	0.0504209	-0.0499458	0.0255171	6.11288e-07	0.170879	0.0341699	824	0.000503701	0.00779058	PCG	SH3BP2	Positive
Ast	ENSG00000284727	rs71595793	120866	61494	0.0593533	282	290	6.98168e-22	0.575805	0.05932	0.0412886	-0.0430647	0.0210926	3.30199e-06	0.264792	0.0567993	1261	0.00416381	0.040437	Other	-	Positive
Ast	ENSG00000168824	rs13434732	-978	-71805	0.468072	1749	2287	0.00337992	0.0833019	0.0283941	2.535e-07	-0.178121	0.0344549	1.92185e-09	0.173644	0.0288103	1337	2.56952e-06	0.000105199	PCG	NSG1	Positive
Ast	ENSG00000247708	rs1992392	31153	-214075	0.358576	1445	1752	6.99161e-20	-0.270683	0.0293989	0.000323198	0.104472	0.0290111	4.05104e-07	-0.147482	0.0290295	1449	0.000586996	0.00851145	LncRNA	STX18-AS1	Positive
Ast	BrainMetalnc.54808	rs3755849	5234	-41257	0.210806	930	1030	6.4721e-48	-0.50183	0.0337578	0.000572359	0.0833055	0.024154	5.01871e-09	-0.206498	0.0351923	1442	7.23698e-06	0.000265102	LncRNA	CRMP1	Positive
Ast	ENSG00000004468	rs4389574	-49500	-124457	0.446173	1686	2180	1.55947e-123	0.637499	0.0254371	0.0493601	-0.0574425	0.0292113	3.20267e-07	0.130738	0.0255081	706	0.000226109	0.00414136	PCG	CD38	Positive
Ast	ENSG00000002549	rs10019856	36921	6147	0.369628	1474	1806	3.38876e-35	0.359843	0.0286101	0.000304623	-0.103462	0.028608	6.87014e-08	0.154947	0.0286345	531	3.64804e-05	0.00085796	PCG	LAP3	Positive
Ast	ENSG00000153012	rs16876506	-9227	-41326	0.105813	496	517	6.338e-08	-0.251264	0.0463089	0.00439379	0.0641413	0.0224972	2.38574e-15	-0.362385	0.0454603	834	1.98971e-12	2.76967e-10	PCG	LGI2	Positive
Ast	BrainMetalnc.55734	rs4586984	-43144	-88509	0.175194	779	856	2.82192e-05	-0.155925	0.0371662	0.00387629	0.0691129	0.0239077	6.56448e-09	-0.214573	0.0368531	626	4.10936e-06	0.000158895	LncRNA	LIMCH1	Positive
Ast	ENSG00000151806	rs11945975	43992	21621	0.234138	999	1144	2.70495e-09	-0.19516	0.0326856	4.88704e-08	0.138482	0.0253044	1.27197e-16	-0.271295	0.032547	396	5.037e-14	8.76437e-12	PCG	GUF1	Positive
Ast	ENSG00000180613	rs7680754	23855	20880	0.367581	1435	1796	0.000224262	-0.106068	0.0287016	6.30744e-05	0.11539	0.0287901	3.08802e-06	-0.131161	0.0280511	558	0.00172312	0.0205007	PCG	GSX2	Positive
Ast	BrainMetalnc.56352	rs11935070	105985	95773	0.411584	1616	2011	5.51588e-12	0.202033	0.0291701	0.000338197	-0.113834	0.0317155	1.98963e-06	0.141472	0.0296835	280	0.000557097	0.00816293	LncRNA	ANKRD17	Positive
Ast	ENSG00000118804	rs4859671	116241	111844	0.479329	1798	2342	1.60709e-22	0.280143	0.0284086	0.000279099	-0.122155	0.0335659	5.32598e-06	0.127594	0.0279709	533	0.00283875	0.0301644	PCG	STBD1	Positive
Ast	ENSG00000138758	rs2703157	66616	-24017	0.367376	1457	1795	9.1614e-69	-0.49651	0.0274408	1.97687e-10	0.176041	0.0275482	5.63146e-13	-0.198844	0.0274327	550	3.0973e-10	3.0796e-08	PCG	SEPTIN11	Positive
Ast	ENSG00000138764	rs4150106	10968	-265214	0.397462	1551	1942	8.41669e-15	0.223362	0.0285991	4.19769e-05	-0.124153	0.0302533	4.45604e-08	0.155881	0.0283981	601	2.67808e-05	0.000654015	PCG	CCNG2	Positive
Ast	ENSG00000249242	rs2140945	239075	159888	0.375972	1471	1837	2.1234e-19	0.257118	0.0283075	2.75608e-07	-0.155067	0.0300875	1.80602e-11	0.191297	0.0283283	541	9.77057e-09	6.47649e-07	PCG	TMEM150C	Positive
Ast	ENSG00000246375	rs9637599	308	-46343	0.497135	1791	2429	0	-1.05696	0.0178021	3.30553e-06	0.102736	0.0220385	4.44947e-06	-0.0825143	0.0179395	590	0.00262519	0.0285809	LncRNA	PPM1K-DT	Positive
Ast	BrainMetalnc.56716	rs9637599	236	-46354	0.497135	1791	2429	0	-1.05748	0.0177801	5.53603e-07	0.110499	0.0220111	8.86957e-07	-0.0882942	0.0179172	587	0.000520644	0.00784734	LncRNA		Positive
Ast	BrainMetalnc.56718	rs958325	-60705	-65259	0.494269	1788	2415	1.52731e-225	0.807874	0.0225916	0.000290872	-0.101	0.0278349	3.97955e-07	0.116049	0.022827	587	0.0002336	0.004223	LncRNA		Positive
Ast	ENSG00000151247	rs6811070	56337	6480	0.430209	1642	2102	1.70045e-05	-0.122795	0.0284934	0.00137449	0.102388	0.0319598	1.62108e-06	-0.140454	0.0292154	446	0.000723002	0.0103755	PCG	EIF4E	Positive
Ast	ENSG00000138777	rs2647252	-2014	-107004	0.270978	1154	1324	3.19704e-10	0.202518	0.0320687	1.70873e-05	-0.11506	0.0267052	3.26713e-08	0.181722	0.0327757	431	1.40813e-05	0.000417047	PCG	PPA2	Positive
Ast	ENSG00000123739	rs2237056	-7535	-27616	0.387638	1532	1894	8.53584e-113	-0.63269	0.026579	0.0253755	0.0610843	0.0273062	5.43031e-06	-0.118736	0.0260526	546	0.00296495	0.0312668	PCG	PLA2G12A	Positive
Ast	BrainMetalnc.57225	rs658642	410	-6197	0.408105	1611	1994	7.23449e-145	0.710078	0.02586	0.000154127	-0.102062	0.0269274	7.51676e-08	0.136551	0.0253111	452	3.39757e-05	0.000815418	LncRNA	PRSS12	Positive
Ast	ENSG00000269893	rs658642	410	-6197	0.408105	1611	1994	1.39889e-159	0.741005	0.0255093	0.000359399	-0.0949139	0.0265623	1.04862e-07	0.133181	0.0249679	452	4.73978e-05	0.00104727	LncRNA	SNHG8	Positive
Ast	BrainMetalnc.57236	rs182009066	263488	261687	0.0894392	416	437	0.0231182	-0.113133	0.0497747	0.11323	0.0348354	0.0219863	1.1151e-05	-0.222246	0.0504792	365	0.0040701	0.0403444	LncRNA		Positive
Ast	ENSG00000250938	rs993109	87901	-409930	0.397462	1532	1942	0.000976415	0.0937634	0.0284024	0.00325464	-0.0890827	0.0302434	2.66322e-08	0.153024	0.0274211	548	1.45945e-05	0.00042324	LncRNA	AC073475.1	Positive
Ast	BrainMetalnc.57276	rs993109	87524	-12152	0.397462	1532	1942	5.95764e-19	0.2502	0.0279044	5.20286e-06	-0.135689	0.0297132	7.4861e-13	0.194211	0.0269403	410	3.0693e-10	3.0796e-08	LncRNA		Positive
Ast	ENSG00000168843	rs17042016	748772	-31335	0.26054	1099	1273	2.86181e-33	0.377456	0.0309408	1.76805e-10	-0.16174	0.0252418	1.41269e-19	0.282385	0.0309334	807	1.14004e-16	2.64489e-14	PCG	FSTL5	Positive
Ast	BrainMetalnc.58097	rs2320771	23545	22619	0.459067	1727	2243	2.21724e-65	0.473883	0.0269223	1.32872e-05	-0.134435	0.0308037	1.78249e-07	0.143202	0.0273502	514	9.16202e-05	0.00187552	LncRNA	MARCHF1	Positive
Ast	ENSG00000273449	rs2320771	23545	22619	0.459067	1727	2243	2.45126e-65	0.47367	0.0269201	1.09855e-05	-0.135709	0.0308011	1.21146e-07	0.14515	0.0273479	514	6.22691e-05	0.00133352	LncRNA	AC093788.1	Positive
Ast	BrainMetalnc.58135	rs6831119	9736	6409	0.271592	1129	1327	1.53898e-119	0.69209	0.0281354	0.000962955	-0.0772904	0.0233848	1.17839e-08	0.164124	0.0286806	673	7.93056e-06	0.000277071	LncRNA	KLHL2	Positive
Ast	BrainMetalnc.58304	rs923111	-86911	-90535	0.273434	1143	1336	0.00872983	0.0830164	0.0316304	0.00456403	-0.0773331	0.0272402	7.26483e-06	0.14444	0.0321299	592	0.00430078	0.0412875	LncRNA	WDR17	Positive
Ast	ENSG00000279943	rs6822335	-9607	-12065	0.44474	1692	2173	0.0019688	-0.0888735	0.028685	2.47774e-05	0.138342	0.032744	7.76824e-07	-0.142877	0.0288407	1176	0.000913546	0.0125906	Other	-	Positive
Ast	ENSG00000134265	rs544553	-1449	-28308	0.445149	1691	2175	1.02748e-34	-0.343606	0.027524	6.48876e-12	0.21215	0.030735	1.69625e-17	-0.23898	0.0278615	1123	1.90488e-14	5.76228e-12	PCG	NAPG	Positive
Ast	BrainMetalnc.33454	rs888267	-14314	-18462	0.353868	1418	1729	3.17822e-63	-0.484041	0.0280072	0.000403835	0.0998341	0.0281821	3.0823e-06	-0.132891	0.0284188	734	0.00226241	0.0350964	LncRNA	PTPN2	Positive
Ast	BrainMetalnc.33645	rs4800151	741	-61654	0.461523	1739	2255	1.04475e-14	-0.220531	0.0283381	3.49183e-05	0.135941	0.0327848	3.215e-06	-0.133808	0.0286685	454	0.00145961	0.0241644	LncRNA	CABLES1	Positive
Ast	BrainMetalnc.33669	rs7407487	103757	65857	0.114818	521	561	2.21942e-10	0.277979	0.0436232	0.0459265	-0.0442611	0.0221628	5.63728e-07	0.218475	0.0435503	602	0.000339364	0.00789675	LncRNA	TTC39C	Positive
Ast	ENSG00000285940	rs1557341	-17817	-214668	0.335039	1363	1637	5.48915e-17	0.251272	0.0297815	0.000527474	-0.100055	0.0288256	2.53173e-06	0.138502	0.029364	578	0.00146334	0.0241644	LncRNA	AC009899.1	Positive
Ast	ENSG00000078043	rs72903390	-32263	-149193	0.0605813	288	296	1.54447e-12	-0.421764	0.0593402	0.0276628	0.0467822	0.0212323	4.12905e-06	-0.273488	0.0592571	625	0.00258066	0.0377432	PCG	PIAS2	Positive
Ast	ENSG00000278983	rs2175564	6043	2496	0.307	1270	1500	3.40819e-22	-0.296243	0.0302831	1.05493e-05	0.122227	0.0276856	4.30854e-10	-0.184719	0.0294697	903	3.89061e-07	2.13983e-05	Other	-	Positive
Ast	BrainMetalnc.34384	rs4940772	-48121	-126535	0.0988539	452	483	0.0364816	0.0980159	0.0468377	0.0305394	-0.0478331	0.0221011	1.19092e-08	0.26853	0.0469404	952	1.13376e-05	0.000489946	LncRNA	ZNF532	Positive
Ast	ENSG00000183287	rs1970693	398844	132542	0.33729	1373	1648	8.78357e-33	0.35379	0.0292338	2.03554e-08	-0.153718	0.0273147	1.24551e-10	0.184824	0.0286028	904	1.12595e-07	7.98624e-06	PCG	CCBE1	Positive
Ast	ENSG00000261126	rs8098075	5408	-25202	0.271797	1146	1328	0	1.06584	0.0236705	0.000119259	-0.0757619	0.0196586	4.58599e-06	0.108952	0.0237201	516	0.00236637	0.0357914	LncRNA	RBFA	Positive
Ast	BrainMetalnc.63360	rs318429	25247	22936	0.424478	1650	2074	0	0.976979	0.0218231	0.00468119	-0.0680506	0.0240393	3.14362e-06	0.10214	0.0218617	831	0.00261235	0.029393	LncRNA		Positive
Ast	ENSG00000230438	rs318429	25071	-5106	0.424478	1650	2074	0	1.03232	0.020741	9.69638e-05	-0.0892084	0.0228473	2.11469e-09	0.124904	0.0207777	853	1.80383e-06	5.66151e-05	LncRNA	SERPINB9P1	Positive
Ast	ENSG00000146038	rs1511479	-171484	-353352	0.439419	1649	2147	0.00116517	-0.0911556	0.0280382	0.000300732	0.114165	0.0315382	1.13379e-06	-0.138681	0.0284229	974	0.00110431	0.0146342	PCG	DCDC2	Positive
Ast	BrainMetalnc.63910	rs4513786	16715	15752	0.152886	684	747	8.46488e-28	0.423364	0.0382638	0.0234943	-0.0513261	0.0226433	1.03254e-07	0.212544	0.0398252	812	8.38421e-05	0.00172406	LncRNA	RIPOR2	Positive
Ast	BrainMetalnc.63931	rs214053	-746	-5618	0.428367	1656	2093	2.20632e-85	-0.541146	0.0265533	2.51212e-17	0.248943	0.0291818	1.30214e-21	-0.253879	0.0263345	678	8.8285e-19	3.94855e-16	LncRNA	CARMIL1	Positive
Ast	BrainMetalnc.63958	rs198834	1750	-1130	0.37106	1474	1813	6.47625e-33	0.346532	0.0285716	0.00111204	-0.0962026	0.02947	1.02378e-06	0.138995	0.0283692	538	0.000550794	0.0086436	LncRNA	H2BC4	Positive
Ast	ENSG00000197062	rs276362	-296601	-307766	0.27896	1165	1363	1.19895e-13	-0.232689	0.0311929	0.00154061	0.0838324	0.0264413	3.43023e-06	-0.145129	0.0311838	286	0.000981045	0.0132961	PCG	ZSCAN26	Positive
Ast	ENSG00000204681	rs2021749	28114	-3634	0.0673352	316	329	8.90533e-33	0.663669	0.0548447	0.00955169	-0.0544539	0.0209947	2.71101e-07	0.270222	0.052399	589	0.000159678	0.00297567	PCG	GABBR1	Positive
Ast	ENSG00000204520	rs2442714	5699	-9832	0.35571	1396	1738	1.78341e-45	-0.402103	0.0278264	0.0005532	0.0959363	0.027742	0.000142768	-0.107006	0.0280904	29	0.00414027	0.0415156	PCG	MICA	Positive
Ast	ENSG00000231925	rs3130270	40750	26057	0.481785	1785	2354	4.63413e-58	-0.445658	0.027011	1.57294e-05	0.142091	0.0328388	4.12174e-07	-0.138315	0.0272428	1860	0.000766643	0.0109522	PCG	TAPBP	Positive
Ast	ENSG00000286550	rs707967	39541	22642	0.35878	1431	1753	3.64555e-19	0.262006	0.0290406	0.00119889	-0.0917047	0.0282781	4.02065e-06	0.131487	0.0284552	401	0.00161228	0.0200303	LncRNA	AL591002.1	Positive
Ast	ENSG00000112796	rs4530856	58562	46767	0.109087	503	533	8.35279e-36	-0.560946	0.0441868	0.00832504	0.0579981	0.0219627	3.3806e-06	-0.200023	0.0429509	489	0.00165311	0.0202563	PCG	ENPP5	Positive
Ast	ENSG00000180113	rs6899519	26288	9963	0.260131	1117	1271	7.089e-72	-0.569557	0.0307245	0.00065566	0.083827	0.0245691	2.5816e-09	-0.180885	0.0302557	523	1.35018e-06	4.56673e-05	PCG	TDRD6	Positive
Ast	BrainMetalnc.64969	rs9382132	2696	1255	0.357348	1430	1746	7.05049e-09	-0.170449	0.0293357	1.09525e-05	0.128454	0.02915	1.8666e-10	-0.187892	0.0293617	693	1.29355e-07	5.93376e-06	LncRNA	TMEM14A	Positive
Ast	ENSG00000124749	rs2745367	190955	-146549	0.416087	1614	2033	2.12839e-22	-0.277054	0.0281792	2.32984e-13	0.225268	0.030567	1.60891e-16	-0.2382	0.0286752	511	8.22153e-14	1.47083e-11	PCG	COL21A1	Positive
Ast	BrainMetalnc.65092	rs1360945	403880	32047	0.335858	1363	1641	3.67115e-12	0.207983	0.0297776	0.000114796	-0.110662	0.0286445	5.24493e-08	0.164183	0.0300705	185	9.70311e-06	0.000267059	LncRNA		Positive
Ast	ENSG00000250686	rs4298382	-369937	-418651	0.194842	859	952	3.30032e-10	0.225235	0.035694	0.00362753	-0.0720939	0.0247602	3.97613e-06	0.162723	0.0351973	194	0.000771369	0.0109522	LncRNA	KHDRBS2	Positive
Ast	ENSG00000287679	rs2687991	-615954	-639739	0.417315	1614	2039	3.25866e-28	0.312504	0.0280174	9.83415e-09	-0.176605	0.0306951	1.73925e-13	0.212376	0.028663	222	3.86114e-11	4.31724e-09	LncRNA	AL355347.1	Positive
Ast	BrainMetalnc.65102	rs9360335	-34685	-41520	0.207736	911	1015	5.11165e-39	0.452236	0.0340027	0.0025453	-0.073397	0.0242953	8.87223e-06	0.155338	0.0348883	256	0.00227129	0.0267213	LncRNA	KHDRBS2	Positive
Ast	ENSG00000219085	rs7771508	7264	6391	0.408309	1576	1995	5.95333e-07	0.143089	0.0285833	0.00022734	-0.112963	0.0305962	1.41621e-06	0.135123	0.0279483	462	0.000654287	0.00988009	Other	-	Positive
Ast	BrainMetalnc.65319	rs10806035	24324	-28478	0.380679	1476	1860	1.40086e-162	0.719451	0.0244985	2.08801e-10	-0.165387	0.0259156	2.84311e-13	0.179863	0.0244963	293	8.33032e-11	7.09664e-09	LncRNA	FILIP1	Positive
Ast	ENSG00000196586	rs276695	10206	-160139	0.35264	1405	1723	1.10883e-15	-0.233684	0.0289641	2.76161e-08	0.158697	0.0284704	1.48901e-09	-0.173921	0.0286578	376	5.59869e-07	2.13108e-05	PCG	MYO6	Positive
Ast	ENSG00000083099	rs68145640	59950	-10655	0.172124	761	841	3.9679e-90	0.720669	0.0343193	0.000134183	-0.083873	0.021929	5.04943e-11	0.225837	0.0342213	620	3.13065e-08	1.60021e-06	PCG	LYRM2	Positive
Ast	BrainMetalnc.65830	rs6570014	-22460	-29659	0.491404	1796	2401	1.0886e-50	0.410063	0.0267555	6.50879e-09	-0.1933	0.0331913	9.83476e-14	0.203068	0.0271251	460	4.52399e-11	4.62232e-09	LncRNA	PNISR	Positive
Ast	BrainMetalnc.65933	rs9404579	46710	2576	0.469505	1752	2294	2.31989e-09	0.168718	0.0281375	8.77833e-09	-0.192867	0.0334087	2.06604e-12	0.206568	0.0292322	521	1.07641e-09	7.24793e-08	LncRNA	HACE1	Positive
Ast	BrainMetalnc.66203	rs6936935	187185	181373	0.164961	741	806	4.55356e-28	-0.415649	0.0373698	5.15586e-05	0.0939419	0.0231631	4.01028e-13	-0.271945	0.0372768	492	1.97306e-10	1.5347e-08	LncRNA	REV3L	Positive
Ast	ENSG00000135549	rs9490532	219923	-13228	0.196684	874	961	0.000284787	-0.130587	0.0359344	0.000132385	0.0956783	0.0249937	1.36644e-11	-0.24757	0.0364399	505	6.9005e-09	3.98225e-07	PCG	KNOWN	Positive
Ast	BrainMetalnc.66427	rs6569392	74337	-247061	0.396439	1557	1937	3.81389e-07	-0.148026	0.0290703	0.00042996	0.108641	0.0308129	5.50972e-07	-0.146219	0.0291212	698	0.000384578	0.0061983	LncRNA	RNF217	Positive
Ast	BrainMetalnc.66450	rs6569440	687	-5613	0.321736	1314	1572	8.33637e-05	0.119075	0.0302132	5.78602e-06	-0.124934	0.0274936	3.44341e-10	0.195977	0.0310904	350	1.20519e-07	5.67393e-06	LncRNA	NCOA7	Positive
Ast	ENSG00000286438	rs271142	-100748	-142636	0.473803	1757	2315	4.76185e-59	-0.44706	0.0268483	0.000620153	0.109508	0.0319534	6.91334e-06	-0.121228	0.0269028	518	0.00358111	0.0373637	LncRNA	AL591115.1	Positive
Ast	ENSG00000112339	rs9389248	1140	-141538	0.421613	1628	2060	5.55024e-192	-0.777735	0.0239935	2.56658e-09	0.153775	0.025717	5.43521e-17	-0.205131	0.0243093	603	3.27743e-14	6.57354e-12	PCG	HBS1L	Positive
Ast	ENSG00000135541	rs2207000	19288	-195708	0.206304	897	1008	5.62463e-143	-0.827817	0.0303776	3.00447e-05	0.0898402	0.0214876	3.35353e-15	-0.240253	0.0303037	504	1.69018e-12	2.32595e-10	PCG	AHI1	Positive
Ast	BrainMetalnc.66782	rs6900336	131349	37567	0.337904	1353	1651	4.27828e-121	0.654088	0.0263962	8.89819e-06	-0.113899	0.0255849	5.24019e-11	0.172713	0.0261936	773	4.05067e-08	2.01296e-06	LncRNA	ECT2L	Positive
Ast	ENSG00000259828	rs9403306	1993	-2002	0.38948	1523	1903	4.22196e-40	0.377594	0.0279725	0.000224949	-0.107167	0.0290053	2.62177e-07	0.143059	0.0277068	284	7.44581e-05	0.0015489	LncRNA	AL355596.1	Positive
Ast	ENSG00000111962	rs9498177	171640	-158320	0.192591	857	941	1.75935e-98	0.72632	0.0329249	8.36876e-10	-0.136302	0.0221192	1.32697e-20	0.314515	0.0334938	908	1.20489e-17	4.3111e-15	PCG	UST	Positive
Ast	BrainMetalnc.67236	rs9384062	8431	321	0.316414	1284	1546	0	1.11947	0.0199873	0.00551624	-0.0516978	0.0186117	4.82885e-06	0.0933585	0.0203734	634	0.00306149	0.0331192	LncRNA		Positive
Ast	ENSG00000112031	rs9384062	4651	-10696	0.316414	1284	1546	0	1.05778	0.0211427	2.39077e-08	-0.11024	0.0196875	1.15693e-13	0.160868	0.0215511	629	7.27711e-11	6.50937e-09	PCG	MTRF1L	Positive
Ast	BrainMetalnc.67271	rs12528403	197446	29055	0.423455	1623	2069	0.00440527	-0.081517	0.0286	2.53019e-05	0.135165	0.0320281	6.97177e-08	-0.159147	0.029425	864	6.02361e-05	0.00132607	LncRNA	TIAM2	Positive
Ast	BrainMetalnc.75858	rs62549788	14448	-40828	0.354073	1427	1730	5.33048e-09	-0.17354	0.0296267	2.27144e-05	0.125567	0.0295826	1.99972e-08	-0.162403	0.028842	791	1.58178e-05	0.000647048	LncRNA	FOCAD	Positive
Ast	ENSG00000188133	rs10971181	102661	97000	0.103357	477	505	2.60035e-71	0.794553	0.0430473	6.08726e-07	-0.103158	0.0206246	4.10917e-22	0.40626	0.0416132	669	2.74903e-19	1.19949e-16	PCG	TMEM215	Positive
Ast	ENSG00000230453	rs62546674	-292340	-340955	0.0656979	309	321	0.000277531	0.208346	0.0572265	0.268827	-0.0236247	0.0213601	3.54911e-06	0.276633	0.0595307	554	0.00196621	0.0307512	PCG	ANKRD18B	Positive
Ast	ENSG00000164978	rs13297645	92681	78476	0.411993	1595	2013	1.57336e-06	-0.138261	0.0287233	0.00176787	0.0963966	0.0307962	4.97241e-07	-0.14553	0.0288697	474	0.000235692	0.00670699	PCG	NUDT2	Positive
Ast	ENSG00000122696	rs74426500	-1411	-26270	0.149611	667	731	3.13556e-136	0.912844	0.0344433	8.8935e-09	-0.118304	0.0205007	5.65715e-21	0.323561	0.0341206	726	4.10709e-18	1.34405e-15	PCG	SLC25A51	Positive
Ast	ENSG00000156052	rs7868833	115145	-200569	0.110725	504	541	0.00277138	0.133959	0.0447265	0.0310394	-0.0486627	0.0225518	2.08747e-06	0.21111	0.044386	535	0.0011168	0.0203104	PCG	GNAQ	Positive
Ast	BrainMetalnc.77152	rs10780754	-15965	-34627	0.452722	1687	2212	4.58106e-36	0.34653	0.0271897	9.31793e-05	-0.125755	0.0321278	8.9187e-07	0.136835	0.0277736	513	0.000457529	0.0106948	LncRNA	TUT7	Positive
Ast	BrainMetalnc.77320	rs7873954	-1157	-4252	0.420794	1637	2056	0	-1.01957	0.0207486	1.53036e-05	0.0973886	0.0224759	3.67157e-06	-0.0953337	0.0205468	435	0.00159713	0.0264639	LncRNA		Positive
Ast	BrainMetalnc.77419	rs62559767	303602	255949	0.309456	1278	1512	7.74558e-171	0.792993	0.0262263	3.81375e-05	-0.0975478	0.0236418	9.79955e-11	0.174733	0.0268881	452	4.4294e-08	3.41064e-06	LncRNA		Positive
Ast	ENSG00000081377	rs10761086	5632	-122874	0.187679	824	917	2.907e-26	-0.377174	0.0351619	1.60773e-06	0.113529	0.0236067	1.78811e-11	-0.245701	0.036377	485	8.67233e-09	8.10863e-07	PCG	CDC14B	Positive
Ast	BrainMetalnc.77450	rs10820745	15081	-127461	0.182358	803	891	7.9137e-08	-0.195699	0.0363378	0.00980494	0.0621187	0.0240335	6.79475e-07	-0.187907	0.0377305	481	0.000326828	0.00822726	LncRNA	CDC14B	Positive
Ast	BrainMetalnc.77451	rs7031988	-157787	-158234	0.185632	815	907	7.84891e-08	-0.194127	0.036036	0.000264751	0.0881768	0.0241388	2.57107e-07	-0.191804	0.0371206	421	0.000108242	0.00345583	LncRNA	CDC14B	Positive
Ast	BrainMetalnc.77470	rs62556579	20250	14012	0.142652	645	697	9.1821e-112	0.868088	0.0366573	0.000327609	-0.0762846	0.0212045	4.14975e-06	0.165972	0.0359696	362	0.00150221	0.0252101	LncRNA	CTSV	Positive
Ast	ENSG00000242616	rs4979032	3090	-5531	0.28817	1191	1408	1.01326e-13	-0.229485	0.0306703	0.000502133	0.0933986	0.0268056	5.32244e-07	-0.154208	0.0306712	603	0.000320943	0.00822726	PCG	GNG10	Positive
Ast	ENSG00000119314	rs4978477	-18320	-134268	0.210806	921	1030	9.98387e-05	0.135675	0.0348115	0.00226338	-0.0754854	0.0246964	1.22091e-06	0.168102	0.0345573	618	0.000754524	0.015195	PCG	PTBP3	Positive
Ast	BrainMetalnc.77917	rs4344146	-8346	-15618	0.430209	1642	2102	1.6168e-27	0.307238	0.0279224	0.000613405	-0.106267	0.0309809	1.08127e-06	0.137056	0.0280356	684	0.000739589	0.0151269	LncRNA	FKBP15	Positive
Ast	ENSG00000226752	rs12343516	16363	-13194	0.410561	1595	2006	0	1.23124	0.0149392	2.35874e-05	-0.0678467	0.0160163	3.14539e-11	0.100115	0.0150089	455	1.43115e-08	1.17086e-06	Other	-	Positive
Ast	ENSG00000234156	rs35918962	3192	-233086	0.132828	592	649	2.8427e-57	0.638423	0.0389829	0.0148361	-0.0529131	0.0217027	5.06859e-07	0.199657	0.0396363	636	0.000322362	0.00822726	LncRNA	AL359636.2	Positive
Ast	BrainMetalnc.78499	rs80055102	71576	34746	0.139992	631	684	1.28017e-09	-0.246268	0.0404149	0.0147857	0.055028	0.0225588	1.64321e-06	-0.200765	0.0417843	689	0.00113218	0.0203104	LncRNA		Positive
Ast	ENSG00000136827	rs11788902	35514	24212	0.217765	948	1064	1.31366e-15	-0.274015	0.0340528	0.0071795	0.0667933	0.024824	4.42256e-07	-0.171867	0.033942	842	0.00037238	0.00902676	PCG	TOR1A	Positive
Ast	BrainMetalnc.78625	rs6597558	-206	-1247	0.475849	1749	2325	2.07958e-55	0.425724	0.026467	4.15012e-10	-0.196305	0.0312885	1.11708e-13	0.194783	0.0260781	841	9.39467e-11	1.3664e-08	LncRNA	NTNG2	Positive
Ast	ENSG00000125484	rs302929	35528	10977	0.39255	1550	1918	1.00771e-18	-0.257064	0.0288631	2.92973e-06	0.143203	0.0305554	4.16926e-09	-0.169154	0.028676	1013	4.22346e-06	0.000197447	PCG	GTF3C4	Positive
Ast	ENSG00000197859	rs2073816	162548	119193	0.383749	1516	1875	1.3756e-17	0.247763	0.0288021	3.73689e-08	-0.166073	0.0300828	5.63458e-11	0.190442	0.0289304	1180	6.64881e-08	4.35164e-06	PCG	ADAMTSL2	Positive
Ast	ENSG00000148399	rs2501567	80599	56118	0.164961	755	806	0.00219105	-0.120357	0.0392515	0.0488313	0.0477757	0.0242387	4.42103e-06	-0.180694	0.0392732	618	0.0027322	0.0406415	PCG	DPH7	Positive
Ast	BrainMetalnc.47339	rs9974669	8791	-7015	0.245804	1048	1201	8.9264e-25	0.334362	0.0321794	0.000265079	-0.0919028	0.025161	1.04963e-07	0.176347	0.0330615	642	6.73864e-05	0.00159802	LncRNA	IFNAR2	Positive
Ast	ENSG00000159228	rs2850069	-100124	-102340	0.173148	784	846	2.96649e-33	0.453325	0.0371693	0.00413413	-0.068033	0.0237011	1.5219e-06	0.180019	0.0373465	716	0.00108968	0.0131091	PCG	CBR1	Positive
Ast	ENSG00000205581	rs4818029	17690	10358	0.498363	1803	2435	1.52006e-14	0.212722	0.0275069	2.18035e-07	-0.174781	0.033624	1.50803e-10	0.178727	0.0277861	1011	1.52462e-07	8.43622e-06	PCG	HMGN1	Positive
Ast	ENSG00000182093	rs2837001	14271	-36559	0.330741	1334	1616	2.24829e-74	0.513004	0.0271601	1.09106e-23	-0.260196	0.0256641	2.27245e-43	0.377121	0.0267765	1007	2.28835e-40	7.59734e-38	PCG	GET1	Positive
Ast	ENSG00000185437	rs61164421	171915	102263	0.112567	504	550	0.000448845	0.153445	0.0436624	0.0427091	-0.0453504	0.0223665	4.82101e-06	0.206436	0.0450467	1015	0.00489332	0.0366002	PCG	SH3BGR	Positive
Ast	ENSG00000182240	rs2252943	78504	-36225	0.252968	1071	1236	4.70639e-41	0.428938	0.0313746	0.000273994	-0.0900618	0.0247148	3.15356e-09	0.182212	0.0306476	1359	4.28569e-06	0.000158094	PCG	BACE2	Positive
Ast	ENSG00000177398	rs11203184	43362	-37133	0.275481	1120	1346	7.75906e-23	0.298568	0.0300462	0.00141654	-0.0821799	0.025722	1.01569e-06	0.142986	0.0291743	1424	0.00144634	0.0145511	PCG	UMODL1	Positive
Ast	BrainMetalnc.47622	rs1571736	6008	439	0.274253	1118	1340	6.3563e-298	0.988454	0.0231517	2.93171e-15	-0.156931	0.0197514	6.50816e-19	0.201601	0.0225094	1390	9.04635e-16	6.70957e-14	LncRNA	UMODL1	Positive
Ast	ENSG00000184385	rs56185023	-706	-7106	0.225952	945	1104	2.03712e-264	1.00563	0.025447	6.18008e-15	-0.153392	0.0195406	7.26962e-19	0.225865	0.0252542	1390	1.01048e-15	6.70957e-14	LncRNA	UMODL1-AS1	Positive
Ast	ENSG00000160209	rs200811891	-1990	-45203	0.493246	1835	2410	1.13473e-13	-0.213873	0.0286421	3.12983e-05	0.142739	0.0342164	1.19263e-06	-0.139553	0.0286608	1021	0.00121768	0.013178	PCG	PDXK	Positive
Ast	ENSG00000160305	rs4819263	72062	-39062	0.0851412	400	416	2.79339e-11	-0.339373	0.0507427	0.0592236	0.0411803	0.0218184	3.19492e-08	-0.282656	0.0509441	587	1.87542e-05	0.000518865	PCG	DIP2A	Positive
Ast	BrainMetalnc.49440	rs12497697	166206	24597	0.259926	1093	1270	9.39762e-55	0.485265	0.0303642	5.65001e-08	-0.136959	0.0251459	3.24291e-12	0.212074	0.0302863	637	2.06574e-09	2.6067e-07	LncRNA	CHL1	Positive
Ast	ENSG00000224318	rs17330105	109044	21462	0.38948	1520	1903	1.30085e-55	0.442586	0.0274605	4.01733e-07	-0.148649	0.02925	6.51964e-10	0.167709	0.0270403	637	4.15301e-07	2.79497e-05	LncRNA	CHL1-AS2	Positive
Ast	BrainMetalnc.49466	rs1020997	1462	-57385	0.439214	1680	2146	2.65312e-24	-0.290006	0.0282063	6.01683e-06	0.145133	0.0319974	4.1237e-08	-0.15429	0.0280374	1573	6.48659e-05	0.00174619	LncRNA	CNTN4	Positive
Ast	ENSG00000180914	rs34880121	16366	-2881	0.389889	1542	1905	2.24628e-160	0.738678	0.0253554	0.0440296	-0.0515256	0.0255729	2.51882e-08	0.140628	0.0251557	1107	2.78833e-05	0.000893594	PCG	OXTR	Positive
Ast	ENSG00000171135	rs279554	1973	-1802	0.30966	1291	1513	0.0161484	0.074861	0.0310986	1.44062e-05	-0.12232	0.0281429	3.09731e-08	0.171661	0.0309085	931	2.8836e-05	0.000909685	PCG	JAGN1	Positive
Ast	ENSG00000186162	rs6443274	-60634	-72761	0.239869	1021	1172	4.44773e-18	0.283772	0.0324876	0.00111056	-0.0832721	0.025506	4.19772e-06	0.153199	0.0332187	968	0.00406339	0.0482588	Other	-	Positive
Ast	BrainMetalnc.49742	rs775017	1902	-551	0.430413	1652	2103	1.22867e-14	0.218542	0.0281587	2.61508e-12	-0.22379	0.0318201	7.75552e-19	0.247428	0.0276881	854	6.62322e-16	2.22871e-13	LncRNA	ATP2B2	Positive
Ast	BrainMetalnc.49819	rs60602014	1358	-2336	0.439009	1693	2145	3.69852e-33	-0.344413	0.0282836	4.67848e-06	0.147267	0.032091	1.509e-08	-0.161775	0.0284826	734	1.1076e-05	0.000399331	LncRNA	IQSEC1	Positive
Ast	ENSG00000206560	rs2455820	-55130	-247665	0.256038	1103	1251	5.5838e-15	0.256092	0.0325694	9.47292e-07	-0.127868	0.0260165	2.11346e-09	0.195121	0.0324578	770	1.62737e-06	8.64645e-05	PCG	ANKRD28	Positive
Ast	BrainMetalnc.49908	rs7646537	-259393	-261573	0.24867	1059	1215	0.0417921	0.0667167	0.0327579	0.00116493	-0.0845653	0.0260107	5.57241e-07	0.163894	0.0326555	705	0.000392855	0.00801186	LncRNA	GALNT15	Positive
Ast	ENSG00000271643	rs7651053	73912	69017	0.275276	1162	1345	0	1.07038	0.0235905	7.01939e-06	-0.0886324	0.0196835	3.73809e-06	0.107423	0.023171	533	0.0019924	0.0291497	LncRNA	AC112220.2	Positive
Ast	ENSG00000093183	rs339705	134987	81876	0.103152	481	504	1.28279e-06	0.227684	0.0469011	0.0151571	-0.0540006	0.0222195	9.17156e-09	0.275984	0.0478685	442	4.05383e-06	0.000170514	PCG	SEC22C	Positive
Ast	ENSG00000241186	rs80045772	3214	-4709	0.250307	1081	1223	4.93862e-298	1.07728	0.0252261	0.0173006	-0.0481344	0.0202086	8.29883e-09	0.14047	0.0242921	407	3.37762e-06	0.000154987	PCG	TDGF1	Positive
Ast	ENSG00000177479	rs11705737	-4998	-72556	0.345682	1391	1689	2.185e-09	-0.177821	0.0296068	0.020899	0.0681903	0.029503	2.66946e-05	-0.129368	0.0307432	151	0.00403088	0.0482028	PCG	ARIH2	Positive
Ast	BrainMetalnc.50949	rs4955418	10334	660	0.373516	1462	1825	1.0799e-16	0.237869	0.0284689	0.000119948	-0.114197	0.0296426	1.89757e-07	0.150122	0.0287361	158	2.99816e-05	0.000931275	LncRNA		Positive
Ast	ENSG00000173540	rs35869135	-398016	-402304	0.175808	780	859	0.000215924	-0.13791	0.0372208	0.0674145	0.0434835	0.0237652	2.25011e-05	-0.154041	0.0362727	170	0.00382518	0.0468063	PCG	GMPPB	Positive
Ast	BrainMetalnc.51033	rs2624853	-19821	-21723	0.478305	1776	2337	2.31756e-05	0.119909	0.0282799	1.56223e-07	-0.178992	0.034026	7.28215e-10	0.178259	0.0288234	184	1.33992e-07	1.0405e-05	LncRNA	RBM5	Positive
Ast	ENSG00000001617	rs3774751	16575	-17455	0.486697	1796	2378	2.0428e-21	0.267686	0.0279059	2.39897e-06	-0.156349	0.0330702	1.892e-08	0.156524	0.0277503	190	3.59481e-06	0.000156188	PCG	SEMA3F	Positive
Ast	ENSG00000188338	rs2236940	1401	-14838	0.323782	1316	1582	3.58917e-15	-0.236534	0.0298673	1.45621e-06	0.132428	0.0274227	1.70332e-07	-0.155238	0.029601	190	3.2363e-05	0.000990014	PCG	SLC38A3	Positive
Ast	BrainMetalnc.51240	rs66465679	-83758	-93086	0.154932	695	757	8.49838e-28	-0.421537	0.0380999	0.000475483	0.0799938	0.0228623	2.69571e-10	-0.240485	0.03792	658	1.77377e-07	1.32639e-05	LncRNA	ERC2	Positive
Ast	ENSG00000168297	rs4681851	77284	-15963	0.14081	630	688	3.73393e-19	0.358298	0.0397254	0.0293798	-0.0493724	0.0226517	6.27567e-06	0.177882	0.0392953	452	0.0028366	0.0386966	PCG	PXK	Positive
Ast	BrainMetalnc.51376	rs4402932	3763	-315	0.376791	1489	1841	1.27864e-23	0.290458	0.0286948	0.000523587	-0.103615	0.0298341	9.2037e-07	0.140627	0.0285792	899	0.000827413	0.015468	LncRNA	PTPRG	Positive
Ast	ENSG00000241218	rs1878350	1627	260	0.287556	1217	1405	9.73974e-05	-0.124275	0.0318372	0.00162486	0.0858699	0.0272176	5.94733e-07	-0.161919	0.0323435	511	0.000303909	0.00652757	Other	-	Positive
Ast	ENSG00000206530	rs59048818	97827	-56323	0.0648792	307	317	5.98018e-09	-0.337103	0.0577414	0.0597074	0.0401688	0.021323	3.27015e-06	-0.268394	0.0575471	544	0.00177896	0.0270054	PCG	CFAP44	Positive
Ast	ENSG00000144837	rs72957041	29366	-2570	0.142857	651	698	1.89306e-07	0.212499	0.0406726	0.00580803	-0.0647706	0.0234603	9.15851e-07	0.195974	0.0398194	477	0.000436861	0.0087329	PCG	PLA1A	Positive
Ast	ENSG00000206527	rs79040346	138301	44068	0.120958	554	591	3.69339e-67	0.73232	0.0409994	0.00410584	-0.0615473	0.0214254	2.24962e-07	0.213015	0.0410258	544	0.000122379	0.00301322	PCG	HACD2	Positive
Ast	BrainMetalnc.52398	rs820324	78640	-16300	0.106836	489	522	0.0324464	0.0982419	0.0459055	0.331263	-0.0218523	0.0224872	4.46768e-06	0.204179	0.0443989	563	0.0025153	0.0353863	LncRNA	MYLK	Positive
Ast	ENSG00000241278	rs13096786	28371	-32778	0.106836	495	522	0.00151897	-0.146381	0.0461095	0.00204995	0.0686047	0.0222294	6.03744e-08	-0.256622	0.0472201	657	3.9666e-05	0.00117773	Other	-	Positive
Ast	ENSG00000114544	rs60794883	77405	-17799	0.338928	1389	1656	1.88763e-08	-0.16889	0.0299405	1.46638e-09	0.17146	0.0282407	8.41304e-19	-0.251215	0.0281412	671	5.64515e-16	2.22871e-13	PCG	SLC41A3	Positive
Ast	ENSG00000175792	rs9843402	-65481	-154617	0.272616	1137	1332	2.85705e-10	0.197817	0.031237	0.000284402	-0.0945371	0.0260119	7.96314e-09	0.17781	0.0307121	526	4.18861e-06	0.00017123	PCG	RUVBL1	Positive
Ast	ENSG00000228252	rs4072146	-102203	-163186	0.491199	1809	2400	0	-0.943718	0.0210676	1.20774e-08	0.146604	0.025638	1.3992e-12	-0.151421	0.0212626	393	5.49887e-10	7.40148e-08	Other	-	Positive
Ast	ENSG00000154928	rs10935141	307057	-355609	0.359804	1423	1758	4.08833e-52	-0.431493	0.0277333	6.20717e-11	0.186797	0.0284401	1.17958e-11	-0.188389	0.0276413	708	8.35142e-09	8.87448e-07	PCG	EPHB1	Positive
Ast	BrainMetalnc.52782	rs1394094	344801	338017	0.359599	1454	1757	7.61401e-14	-0.223644	0.0297373	0.00232504	0.0878825	0.0288287	8.42567e-06	-0.133965	0.0300127	342	0.00288158	0.0390464	LncRNA	PPP2R3A	Positive
Ast	ENSG00000168917	rs9835571	-14014	-51255	0.32194	1325	1573	3.71952e-49	-0.441288	0.0292766	8.22041e-07	0.13213	0.0267313	1.22855e-11	-0.196753	0.0288937	316	3.88221e-09	4.6107e-07	PCG	SLC35G2	Positive
Ast	ENSG00000163754	rs2331536	140068	101350	0.308023	1275	1505	5.47072e-06	-0.140247	0.0307829	4.56545e-05	0.11095	0.0271656	1.22549e-06	-0.144523	0.0297146	611	0.000748772	0.0143434	PCG	GYG1	Positive
Ast	ENSG00000243321	rs56198011	2644	21	0.327262	1335	1599	8.30514e-193	-0.822095	0.0252967	4.92676e-09	0.136774	0.0232973	7.36998e-08	-0.135161	0.0250369	734	5.40957e-05	0.00150262	LncRNA	LINC01998	Positive
Ast	BrainMetalnc.53434	rs745707	-170626	-181831	0.319075	1324	1559	0.000184821	0.115638	0.0308809	0.0018902	-0.0865795	0.0278359	1.66612e-06	0.148769	0.0309807	289	0.000481509	0.00953106	LncRNA	NMD3	Positive
Ast	BrainMetalnc.53880	rs9825132	131779	19973	0.31887	1306	1558	0	-1.0475	0.0218791	2.7157e-09	0.118237	0.0198046	3.4776e-09	-0.127628	0.0215256	376	1.30758e-06	7.13513e-05	LncRNA		Positive
Ast	ENSG00000241231	rs7653260	63616	-6249	0.315186	1294	1540	0	-1.04611	0.0220641	8.68276e-09	0.114373	0.0198055	9.69437e-09	-0.124625	0.0216514	361	3.49967e-06	0.000156188	LncRNA	AC068308.1	Positive
Ast	BrainMetalnc.53947	rs59679804	-40226	-42697	0.368809	1450	1802	5.4431e-14	0.216481	0.0286145	3.7051e-06	-0.135056	0.0291199	7.64373e-11	0.190418	0.0291316	746	5.70222e-08	5.00556e-06	LncRNA	ABCC5	Positive
Ast	ENSG00000145012	rs35400531	660430	-22044	0.186042	826	909	0.0103783	-0.093761	0.0365547	3.25986e-08	0.13484	0.0243183	8.50897e-07	-0.181078	0.0366845	1131	0.000962365	0.0171794	PCG	LPP	Positive
Ast	ENSG00000041802	rs3821402	8059	-23613	0.155751	699	761	1.90976e-258	1.19903	0.030786	0.000484518	-0.0648988	0.0185749	9.63906e-07	0.1467	0.029869	1151	0.00110946	0.0186895	PCG	LSG1	Positive
Ast	ENSG00000114331	rs6437374	81403	-86872	0.350389	1402	1712	0	1.01007	0.0214368	0.000709143	-0.0709691	0.0209327	7.46644e-08	0.115172	0.0213435	1149	8.57894e-05	0.00221288	PCG	ACAP2	Positive
Ast	ENSG00000189058	rs13303068	42551	27302	0.454359	1728	2220	0.0011261	0.0940962	0.0288564	3.81314e-05	-0.135609	0.0328661	3.93639e-06	0.131434	0.0284164	1025	0.0040348	0.0482028	PCG	APOD	Positive
Ast	ENSG00000205696	rs12769719	31979	1632	0.445354	1694	2176	8.58632e-08	0.153194	0.0285241	6.60239e-06	-0.146931	0.0325358	2.42471e-08	0.160683	0.0287088	984	2.38591e-05	0.000590514	LncRNA	ADARB2-AS1	Positive
Ast	ENSG00000187134	rs7094041	-22967	-42997	0.416291	1626	2034	8.68783e-153	0.712561	0.025161	1.17747e-15	-0.217607	0.0269967	1.8482e-21	0.238332	0.024818	934	1.72622e-18	4.27239e-16	PCG	AKR1C1	Positive
Ast	ENSG00000151632	rs75824824	16212	-14419	0.104585	495	511	2.02987e-111	1.01462	0.0429197	0.000642733	-0.0693735	0.0203004	1.29291e-10	0.270567	0.0419094	963	1.24507e-07	5.6028e-06	PCG	AKR1C2	Positive
Ast	ENSG00000225383	rs1018574	107173	96563	0.271592	1130	1327	1.38921e-21	0.297602	0.0308919	0.00279306	-0.0757383	0.0253078	2.19524e-07	0.164845	0.0317204	864	0.000189668	0.00361099	LncRNA	SFTA1P	Positive
Ast	ENSG00000134463	rs11257291	-3787	-25491	0.284077	1183	1388	6.17262e-31	-0.355937	0.0303519	1.15763e-07	0.139785	0.0262956	5.77291e-12	-0.209476	0.0302736	1076	6.21165e-09	3.29439e-07	PCG	ECHDC3	Positive
Ast	ENSG00000181192	rs9794070	58716	4449	0.252763	1067	1235	0.00284226	-0.0964599	0.0322896	1.56686e-05	0.111937	0.0258646	5.64921e-07	-0.168911	0.0336729	1218	0.000688074	0.00982491	PCG	DHTKD1	Positive
Ast	BrainMetalnc.7883	rs56155004	1095	-1294	0.433483	1650	2118	5.76707e-43	0.382669	0.0273086	1.00265e-08	-0.173075	0.0300988	1.67506e-13	0.200611	0.0270565	1195	2.00169e-10	1.23855e-08	LncRNA	CAMK1D	Positive
Ast	ENSG00000165983	rs7072050	71178	-5612	0.445149	1687	2175	0.00973621	-0.0737882	0.0285216	0.000125734	0.123365	0.0321192	4.29949e-07	-0.144672	0.0285407	732	0.000314723	0.00519293	PCG	PTER	Positive
Ast	ENSG00000240291	rs10829009	97824	65379	0.316414	1299	1546	1.47485e-21	0.288859	0.0300042	0.000930824	-0.0927949	0.0279949	2.19888e-06	0.139646	0.0294263	814	0.00178988	0.0212638	LncRNA	AL450384.2	Positive
Ast	ENSG00000225527	rs7899017	123128	121641	0.362669	1432	1772	2.63055e-19	-0.259799	0.0286788	5.36295e-05	0.117555	0.0290518	5.32432e-08	-0.157	0.0287692	802	4.27011e-05	0.000990798	LncRNA	AL450384.1	Positive
Ast	BrainMetalnc.8220	rs6482575	10439	5227	0.426115	1640	2082	1.21994e-85	0.541971	0.0265496	2.48609e-08	-0.163742	0.0292782	2.83436e-15	0.21612	0.0271863	540	1.53055e-12	1.19625e-10	LncRNA	ABI1	Positive
Ast	ENSG00000120539	rs9299837	19459	-13227	0.354278	1412	1731	1.93345e-23	-0.28867	0.0286376	1.0216e-07	0.147936	0.0277091	1.34606e-17	-0.247426	0.0287544	553	7.44369e-15	9.21156e-13	PCG	MASTL	Positive
Ast	BrainMetalnc.8529	rs12357831	-383286	-390181	0.239869	1027	1172	5.43895e-37	0.415247	0.0321371	0.00247058	-0.0744301	0.0245638	3.04239e-06	0.151386	0.0323553	219	0.000666283	0.00960613	LncRNA	ZNF33A	Positive
Ast	BrainMetalnc.8533	rs932538	-9673	-37330	0.435325	1674	2127	2.56804e-120	0.636792	0.0257924	1.08835e-10	-0.182893	0.0282134	1.91091e-14	0.203727	0.026446	202	3.86004e-12	2.86608e-10	LncRNA	ZNF37A	Positive
Ast	BrainMetalnc.8534	rs932538	-37390	-44944	0.435325	1674	2127	2.82989e-92	0.565124	0.0265628	1.53102e-07	-0.152957	0.0290561	2.94826e-10	0.172345	0.0272359	203	5.98498e-08	2.867e-06	LncRNA	ZNF37A	Positive
Ast	ENSG00000265763	rs1993493	1002	-17795	0.281212	1184	1374	7.84182e-26	0.330226	0.0310645	2.28545e-05	-0.108313	0.025526	1.01227e-07	0.163072	0.0305346	266	2.69263e-05	0.000655501	PCG	ZNF488	Positive
Ast	ENSG00000185532	rs10996069	215177	-1092358	0.492018	1802	2404	4.41563e-180	0.745676	0.0239025	0.029505	-0.0624522	0.0286747	1.06637e-06	0.117278	0.0239764	959	0.00102265	0.0138057	PCG	PRKG1	Positive
Ast	ENSG00000122870	rs2033149	-7891	-326454	0.428981	1649	2096	8.06854e-27	0.305506	0.0281567	0.00103137	-0.104251	0.0317279	5.03309e-07	0.146389	0.0290534	485	0.000244105	0.00421507	PCG	BICC1	Positive
Ast	BrainMetalnc.8881	rs7916800	56390	33191	0.145518	658	711	1.15518e-71	-0.69757	0.0376911	0.000428779	0.0779703	0.0221095	1.00743e-09	-0.233287	0.0380424	496	4.99683e-07	1.85507e-05	LncRNA	PHYHIPL	Positive
Ast	ENSG00000150347	rs10740058	134003	-61257	0.283872	1211	1387	1.52621e-08	-0.182073	0.0320675	0.00196202	0.0834562	0.0269276	4.06321e-07	-0.162787	0.0320456	491	0.000199503	0.00365756	PCG	ARID5B	Positive
Ast	BrainMetalnc.8975	rs10995021	-773	-28413	0.450266	1720	2200	1.38463e-29	-0.321601	0.0280977	1.61989e-09	0.191267	0.0315875	3.17541e-13	-0.207544	0.0283245	445	1.41306e-10	9.12343e-09	LncRNA	ARID5B	Positive
Ast	ENSG00000099282	rs1227967	56613	412	0.496521	1821	2426	7.14892e-87	-0.54066	0.026277	0.000132458	0.123042	0.032143	6.82491e-07	-0.131373	0.0263834	900	0.000614242	0.0091215	PCG	TSPAN15	Positive
Ast	ENSG00000079332	rs10823500	98145	74911	0.361646	1433	1767	1.00912e-44	0.402037	0.0280746	1.36869e-05	-0.122885	0.0281994	1.82834e-08	0.155518	0.0275429	1137	2.07882e-05	0.000523229	PCG	SAR1A	Positive
Ast	ENSG00000122882	rs12242214	-46836	-85736	0.0650839	302	318	2.21848e-08	-0.316391	0.0563714	0.117509	0.0331969	0.0212003	4.7789e-07	-0.27752	0.0549696	156	7.45509e-05	0.00162806	PCG	ECD	Positive
Ast	ENSG00000148655	rs4746395	1017949	-110595	0.346091	1401	1691	3.89178e-255	-0.915185	0.0236911	6.12525e-10	0.142667	0.0229657	2.3826e-09	-0.141403	0.0235995	705	1.67973e-06	5.30724e-05	PCG	LRMDA	Positive
Ast	ENSG00000188199	rs10749148	133517	122063	0.41404	1575	2023	1.71348e-289	-0.904245	0.0215812	4.48605e-05	0.0961177	0.0235104	2.31615e-06	-0.101276	0.0213889	772	0.00178807	0.0212638	PCG	NUTM2B	Positive
Ast	ENSG00000273372	rs2245121	-28731	-33731	0.419361	1616	2049	0.000174426	0.107914	0.0287063	0.00384663	-0.0874307	0.0302189	1.0133e-06	0.138281	0.0282118	756	0.000766054	0.010732	LncRNA	SFTPD-AS1	Positive
Ast	BrainMetalnc.9510	rs11201950	28877	10077	0.24519	1035	1198	2.69948e-170	-0.829384	0.0274814	4.93426e-11	0.14343	0.0217225	2.37266e-22	-0.274148	0.027916	699	1.65849e-19	8.20954e-17	LncRNA	ANXA11	Positive
Ast	ENSG00000122359	rs11201950	15694	-38989	0.24519	1035	1198	8.09608e-229	-0.936823	0.0259646	8.09599e-14	0.154182	0.0205236	6.43073e-27	-0.286749	0.0263752	702	4.51438e-24	6.70385e-21	PCG	ANXA11	Positive
Ast	BrainMetalnc.10151	rs3781290	-66560	-97261	0.354892	1440	1734	0.00100695	-0.0991053	0.0300997	0.0053722	0.0827556	0.0297007	8.22306e-06	-0.136094	0.030454	293	0.00240936	0.0265029	LncRNA	SUFU	Positive
Ast	ENSG00000214435	rs1358465463	162368	129939	0.141629	629	692	5.06193e-81	-0.732369	0.0369911	9.28059e-05	0.0832619	0.0212663	4.77427e-09	-0.21629	0.0368085	371	1.77125e-06	5.36799e-05	PCG	AS3MT	Positive
Ast	BrainMetalnc.10201	rs4917999	26541	18426	0.3158	1287	1543	0.0108287	0.0761421	0.029858	1.02553e-10	-0.177726	0.0273779	4.18215e-21	0.286483	0.030107	367	1.53485e-18	4.27239e-16	LncRNA	NT5C2	Positive
Ast	ENSG00000065618	rs805686	-890	-55484	0.221858	958	1084	9.54861e-05	0.133184	0.0340773	0.0608054	-0.047384	0.025261	1.08647e-05	0.14823	0.0336245	477	0.00518247	0.0472145	PCG	COL17A1	Positive
Ast	ENSG00000148841	rs276231	12093	-16674	0.305362	1262	1492	5.07692e-17	0.257166	0.0304462	0.000732654	-0.0929384	0.0274855	1.17628e-06	0.148782	0.0305389	478	0.00056226	0.00860779	PCG	ITPRIP	Positive
Ast	ENSG00000203867	rs72641327	125626	-69506	0.179288	807	876	7.677e-09	0.215484	0.0371793	2.16707e-05	-0.102569	0.0241041	6.82315e-13	0.256872	0.0355688	598	4.08024e-10	2.42366e-08	PCG	RBM20	Positive
Ast	BrainMetalnc.10353	rs9663346	125286	121015	0.129144	579	631	1.79901e-18	-0.362879	0.0410509	0.0122631	0.0560386	0.0223586	1.84502e-09	-0.259818	0.0430601	579	1.06827e-06	3.54236e-05	LncRNA	BBIP1	Positive
Ast	ENSG00000183605	rs2275111	17166	-7781	0.491813	1820	2403	2.19604e-136	-0.666092	0.0251165	3.07436e-14	0.240888	0.0315255	1.94161e-17	-0.215557	0.0251777	687	1.33389e-14	1.52371e-12	PCG	SFXN4	Positive
Ast	ENSG00000226864	rs10887024	325	-23328	0.321531	1318	1571	0	-1.19721	0.018557	4.10108e-08	0.0951695	0.017291	1.64978e-08	-0.104421	0.018435	833	1.37426e-05	0.000371051	Other	-	Positive
Ast	ENSG00000273891	rs11200264	-39417	-41298	0.333606	1357	1630	4.45234e-106	-0.628307	0.0273222	2.1837e-06	0.122809	0.0258708	1.89636e-09	-0.165265	0.0274101	801	1.51898e-06	4.90368e-05	LncRNA	AL731566.2	Positive
Ast	BrainMetalnc.10731	rs11200264	-39417	-41353	0.333606	1357	1630	7.58928e-107	-0.630096	0.0272893	6.35311e-07	0.129026	0.0258396	4.68715e-10	-0.171236	0.027377	801	3.75441e-07	1.42956e-05	LncRNA	NSMCE4A	Positive
Ast	ENSG00000138162	rs2943763	38271	-227111	0.241506	1032	1180	2.13023e-88	0.626178	0.0301415	1.08122e-11	-0.164165	0.024042	6.2308e-21	0.290383	0.0306556	903	5.62641e-18	1.1936e-15	PCG	TACC2	Positive
Ast	BrainMetalnc.10856	rs11245005	13141	278	0.105813	486	517	2.2946e-110	0.975428	0.041483	0.00533303	-0.0558713	0.0200349	3.68263e-07	0.226853	0.0444923	809	0.000297925	0.004971	LncRNA	C10orf90	Positive
Ast	BrainMetalnc.11051	rs2265903	-123993	-138467	0.335244	1355	1638	1.18438e-75	-0.533496	0.027982	0.00696096	0.071696	0.0265443	8.59025e-06	-0.125214	0.0280785	459	0.00394292	0.0387764	LncRNA		Positive
Ast	ENSG00000100461	rs2008951	53839	29241	0.457225	1731	2234	2.3156e-09	-0.171522	0.0286037	0.000596503	0.110447	0.0321282	2.29105e-06	-0.134965	0.0284904	919	0.00210547	0.0295033	PCG	RBM23	Positive
Ast	ENSG00000092068	rs6572985	8723	-49656	0.35919	1435	1755	0.0218086	0.0672539	0.0293025	2.41507e-09	-0.173139	0.0289068	8.36854e-16	0.233977	0.0288744	907	7.59027e-13	2.80081e-10	PCG	SLC7A8	Positive
Ast	ENSG00000168952	rs4983037	135477	-105164	0.310684	1302	1518	2.05933e-75	0.557838	0.0293099	0.00102817	-0.0829428	0.0252361	2.25258e-06	0.137812	0.0290701	731	0.00164664	0.0246328	PCG	STXBP6	Positive
Ast	ENSG00000196792	rs1386998633	33580	-99022	0.250921	1081	1226	9.84434e-09	-0.18969	0.0329703	0.00109376	0.084895	0.0259687	1.16072e-06	-0.161769	0.0331865	569	0.000660448	0.0126054	PCG	STRN3	Positive
Ast	BrainMetalnc.21903	rs4900925	292167	-243535	0.268318	1141	1311	2.75887e-13	0.234829	0.0319645	0.000133671	-0.101445	0.0265166	5.96395e-09	0.184603	0.0316176	632	3.76922e-06	0.000181414	LncRNA	NEMF	Positive
Ast	ENSG00000165502	rs4900925	-72923	-75019	0.268318	1141	1311	2.39395e-139	-0.765109	0.0284958	0.0408216	0.0483756	0.0236391	5.3432e-06	-0.128559	0.0281866	491	0.00262351	0.0363028	PCG	RPL36AL	Positive
Ast	BrainMetalnc.21946	rs11157787	39150	-3534	0.275276	1161	1345	1.67417e-60	-0.506281	0.0300049	1.80121e-10	0.161135	0.0251587	1.2636e-16	-0.252374	0.0302742	815	1.02984e-13	5.70014e-11	LncRNA	TRIM9	Positive
Ast	BrainMetalnc.22243	rs8011271	194563	188979	0.468072	1740	2287	2.09814e-16	0.230779	0.0278908	8.65584e-05	-0.128101	0.0325783	6.21908e-07	0.138763	0.0277663	481	0.000299138	0.00735878	LncRNA	DAAM1	Positive
Ast	BrainMetalnc.22238	rs8660	42622	13250	0.469505	1746	2294	2.36362e-24	0.285571	0.0277437	0.00011001	-0.125788	0.0324722	2.45796e-06	0.130616	0.0276564	471	0.0011577	0.0197165	LncRNA	GPR135	Positive
Ast	ENSG00000100644	rs1088672	-157932	-210678	0.129758	596	634	3.27211e-08	-0.235522	0.0424813	0.000250564	0.0838637	0.0228692	1.36283e-06	-0.207006	0.0427483	618	0.000842227	0.0155391	PCG	HIF1A	Positive
Ast	BrainMetalnc.22425	rs6573614	18858	15267	0.338109	1384	1652	7.60573e-125	-0.682547	0.0270714	5.2345e-07	0.12847	0.0255357	4.32414e-11	-0.174301	0.0263187	531	2.29612e-08	3.63114e-06	LncRNA	FUT8	Positive
Ast	ENSG00000286333	rs4903030	2146	-27069	0.402374	1564	1966	1.79012e-07	0.150426	0.0287343	0.000325244	-0.110537	0.0307094	1.03304e-06	0.140072	0.0285995	632	0.000652884	0.0126054	LncRNA	AC004828.2	Positive
Ast	ENSG00000119673	rs58231493	-2202	-10240	0.422227	1644	2063	2.26828e-162	-0.738064	0.0251513	2.89318e-08	0.154813	0.0278145	2.46387e-08	-0.140119	0.0250472	527	1.29846e-05	0.000513355	PCG	ACOT2	Positive
Ast	ENSG00000119661	rs60510049	73339	14482	0.0974212	443	476	2.61403e-22	-0.451821	0.0460558	0.0197427	0.0500266	0.0214454	2.34638e-08	-0.28108	0.050168	541	1.26939e-05	0.000513355	PCG	DNAL1	Positive
Ast	BrainMetalnc.22763	rs12881035	112895	83698	0.113795	520	556	0.000681862	0.151024	0.044404	0.0404554	-0.0464378	0.0226508	5.25031e-06	0.201274	0.0440935	521	0.00273541	0.0372698	LncRNA	ACYP1	Positive
Ast	BrainMetalnc.23100	rs12894343	21985	-44156	0.355301	1429	1736	4.33663e-48	0.424041	0.028469	9.33664e-07	-0.139005	0.028266	1.29927e-10	0.180654	0.0279857	631	8.19839e-08	8.25056e-06	LncRNA	TTC7B	Positive
Ast	ENSG00000015133	rs1704656	330614	184093	0.45395	1717	2218	5.86695e-44	-0.39142	0.0275897	0.000275479	0.114343	0.0313901	4.19695e-06	-0.12762	0.0276722	736	0.00308896	0.0394273	PCG	CCDC88C	Positive
Ast	ENSG00000260711	rs1951251	-359937	-366879	0.406877	1579	1988	0.0387754	-0.0597157	0.0288805	0.0049869	0.0863966	0.0307413	1.70929e-06	-0.137324	0.0286282	774	0.00132299	0.0209222	LncRNA	AL121839.2	Positive
Ast	ENSG00000197119	rs1059264	11710	-3721	0.342816	1369	1675	0.0237868	0.0663381	0.0293275	2.84535e-07	-0.145538	0.0282716	8.1067e-13	0.21111	0.0293295	865	7.0123e-10	1.55252e-07	PCG	SLC25A29	Positive
Ast	ENSG00000254656	rs72711907	-852440	-876409	0.0665166	315	325	0.00569666	-0.158328	0.0572159	0.0413486	0.0442116	0.0216607	9.87369e-08	-0.291331	0.054504	861	8.50124e-05	0.0027679	PCG	RTL1	Positive
Ast	ENSG00000258811	rs12886857	-29382	-32635	0.135898	622	664	7.20849e-12	0.285509	0.0414545	0.0300673	-0.049775	0.0229328	5.38093e-06	0.185611	0.0407087	677	0.00364289	0.0429008	LncRNA	AL583810.2	Positive
Ast	ENSG00000099940	rs28360498	-180876	-212768	0.322145	1305	1574	7.64573e-06	-0.134014	0.0298836	0.00102389	0.0912917	0.0277664	2.07404e-08	-0.164777	0.0292968	522	1.08265e-05	0.000300435	PCG	SNAP29	Positive
Ast	BrainMetalnc.48123	rs396953	9678	-648	0.0683586	315	334	4.68665e-146	1.34281	0.0486724	0.088009	-0.0329526	0.019308	1.41905e-09	0.26838	0.0441651	478	6.78307e-07	3.29403e-05	LncRNA		Positive
Ast	ENSG00000206145	rs396953	9655	-119	0.0683586	315	334	4.10198e-147	1.34736	0.0486335	0.128989	-0.0292981	0.0192926	4.16797e-09	0.260316	0.0441298	478	1.99229e-06	7.74004e-05	Other	-	Positive
Ast	BrainMetalnc.48185	rs1807488	-2273	-14351	0.438395	1686	2142	0.000473938	0.101291	0.0289419	2.75766e-06	-0.148073	0.0315106	1.08757e-09	0.174593	0.0285286	733	7.9719e-07	3.4412e-05	LncRNA		Positive
Ast	ENSG00000272779	rs9619903	3561	-3616	0.247237	1058	1208	2.65454e-23	0.324337	0.03228	4.91116e-06	-0.114434	0.0249921	2.23925e-14	0.249069	0.0324193	733	1.64137e-11	3.18836e-09	Other	-	Positive
Ast	ENSG00000100218	rs5759642	142091	56476	0.320508	1308	1566	1.37651e-05	-0.131256	0.030129	7.47427e-06	0.125304	0.027911	1.9656e-10	-0.194311	0.030403	987	1.94005e-07	1.00494e-05	PCG	RSPH14	Positive
Ast	ENSG00000186716	rs13053509	141881	3548	0.335653	1380	1640	3.13868e-111	0.652937	0.0276465	0.00257448	-0.0794811	0.0263395	1.09824e-06	0.133957	0.027419	959	0.00105321	0.0159463	PCG	BCR	Positive
Ast	ENSG00000225282	rs5760119	-2256	-4930	0.411789	1605	2012	0	-1.11062	0.0187144	2.56787e-07	0.106618	0.0206334	7.03804e-07	-0.0942727	0.0189555	712	0.000501109	0.00892775	Other	-	Positive
Ast	BrainMetalnc.48340	rs6004662	18052	-12065	0.0665166	317	325	1.80229e-89	1.10997	0.0530732	8.7457e-05	-0.0784387	0.019961	9.49679e-09	0.289467	0.050259	898	8.52811e-06	0.000265054	LncRNA		Positive
Ast	ENSG00000100058	rs760554	28520	-44229	0.0667212	316	326	9.53329e-12	0.384841	0.0562088	1.63527e-05	-0.0920474	0.0213157	5.08865e-16	0.43394	0.0531452	908	4.6205e-13	1.19671e-10	Other	-	Positive
Ast	ENSG00000237977	rs12167144	2	-560	0.285714	1198	1396	9.72977e-50	-0.45685	0.0301161	1.98435e-05	0.111023	0.02597	1.67338e-10	-0.190626	0.0297103	434	7.26245e-08	4.34071e-06	Other	-	Positive
Ast	ENSG00000100191	rs136432	-34421	-71304	0.455997	1714	2228	6.43205e-38	-0.360618	0.0275374	1.47563e-05	0.13583	0.0312894	1.10921e-06	-0.133812	0.0274004	659	0.000730968	0.0118325	PCG	SLC5A4	Positive
Ast	ENSG00000100116	rs8140423	-8316	-17587	0.216332	943	1057	0.00811183	-0.0914592	0.0345187	0.000180196	0.0927874	0.0247364	3.36245e-08	-0.193537	0.0349389	748	2.51512e-05	0.000651415	PCG	GCAT	Positive
Ast	BrainMetalnc.48815	rs2413493	63950	-292241	0.398076	1578	1945	6.78043e-67	0.496847	0.0278762	0.000274772	-0.104951	0.0288065	3.88289e-07	0.141826	0.0278716	811	0.000314902	0.00674603	LncRNA	TPTEP2-CSNK1E	Positive
Ast	ENSG00000198792	rs6001074	40299	-13419	0.381089	1505	1862	0.000195942	0.10894	0.0292074	0.000582711	-0.105401	0.0306037	3.11774e-06	0.135049	0.0288949	656	0.00204524	0.0278511	PCG	TMEM184B	Positive
Ast	ENSG00000213923	rs1057465	1300	-26092	0.265248	1118	1296	2.06338e-16	0.261683	0.0316179	0.00068679	-0.089637	0.0263703	9.2824e-07	0.156139	0.0317427	622	0.000577366	0.00975246	PCG	CSNK1E	Positive
Ast	ENSG00000288106	rs765080	-6372	-23329	0.397462	1557	1942	2.25339e-24	0.292663	0.0284195	3.33844e-05	-0.12296	0.0295802	5.81008e-11	0.185205	0.0281547	554	3.21878e-08	2.50099e-06	LncRNA	AL022318.5	Positive
Ast	ENSG00000100395	rs139475	22690	-3279	0.36492	1443	1783	1.29074e-44	-0.400819	0.0280258	0.00031652	0.104177	0.0288855	2.81901e-08	-0.159861	0.0286979	272	7.6677e-06	0.000248242	PCG	L3MBTL2	Positive
Ast	ENSG00000172346	rs4822038	1481	-15250	0.19914	864	973	1.35139e-277	1.0928	0.0268018	2.14301e-15	-0.149201	0.018685	3.72492e-26	0.27889	0.0260578	379	1.41174e-23	5.48462e-21	PCG	CSDC2	Positive
Ast	ENSG00000159958	rs67797654	42371	37597	0.1228	555	600	1.70786e-60	0.682973	0.0404798	0.0347044	-0.0454949	0.0215312	4.28655e-06	0.179752	0.0390134	485	0.00207897	0.0278511	PCG	TNFRSF13C	Positive
Ast	ENSG00000183172	rs8135801	-127	-4720	0.341384	1384	1668	1.57907e-36	-0.37187	0.0289771	1.12311e-06	0.134195	0.0274927	3.13228e-11	-0.194918	0.0292185	504	1.57867e-08	1.36292e-06	PCG	SMDT1	Positive
Ast	ENSG00000237037	rs5751229	58286	11470	0.222677	963	1088	0.00475565	0.0958271	0.0339123	0.000111637	-0.0986177	0.0254818	7.97083e-11	0.225177	0.0344829	528	4.2086e-08	2.9728e-06	LncRNA	NDUFA6-DT	Positive
Ast	ENSG00000242247	rs5751371	-3897	-65501	0.438805	1677	2144	4.14419e-46	0.400852	0.0275326	1.68402e-07	-0.163473	0.0311587	1.34693e-12	0.199968	0.0280586	797	1.07351e-09	1.04264e-07	PCG	ARFGAP3	Positive
Ast	ENSG00000159307	rs2007836	100447	-45645	0.172329	765	842	1.08924e-99	0.746526	0.0336113	2.33381e-10	-0.137193	0.0215562	1.4265e-32	0.395762	0.0328166	1109	1.58199e-29	1.22921e-26	PCG	SCUBE1	Positive
Ast	ENSG00000100422	rs135668	4389	-49453	0.432051	1666	2111	0.000899372	0.0962827	0.0289629	1.80713e-05	-0.138383	0.0322119	1.99346e-06	0.137245	0.028799	1042	0.00207718	0.0278511	PCG	CERK	Positive
Ast	ENSG00000136238	rs836550	26279	-3161	0.400327	1562	1956	1.56499e-09	0.174159	0.0287354	2.81794e-07	-0.154497	0.0300013	4.84985e-09	0.170203	0.0289784	1037	5.02929e-06	0.000171901	PCG	RAC1	Positive
Ast	ENSG00000214960	rs7805187	187034	-227945	0.399304	1563	1951	0.000159906	-0.109711	0.029016	1.28976e-05	0.135443	0.0309881	5.01858e-08	-0.159533	0.0291766	1079	5.41505e-05	0.00134121	PCG	CRPPA	Positive
Ast	BrainMetalnc.68258	rs62443202	1228	-1903	0.32194	1304	1573	1.01801e-16	-0.246642	0.0294937	1.04235e-06	0.138211	0.0282297	7.26275e-12	-0.202024	0.0293375	942	6.84151e-09	4.87173e-07	LncRNA	ANKMY2	Positive
Ast	ENSG00000070882	rs10265239	136499	-48595	0.163119	729	797	3.83238e-34	-0.460335	0.037208	0.00436773	0.0659749	0.023125	1.53014e-07	-0.198769	0.0377579	897	0.000137253	0.00271469	PCG	OSBPL3	Positive
Ast	BrainMetalnc.68488	rs2699812	-2459	-9850	0.435939	1656	2130	6.79023e-12	-0.194772	0.0282443	0.000397101	0.114811	0.0323691	2.03119e-06	-0.13175	0.0276681	622	0.0012634	0.0162342	LncRNA	SNX10	Positive
Ast	ENSG00000006625	rs2284217	177371	169151	0.210397	928	1028	2.38174e-65	0.585347	0.0332635	7.42988e-05	-0.0925896	0.0233289	8.58607e-08	0.17907	0.0333422	660	5.66681e-05	0.00134933	PCG	GGCT	Positive
Ast	ENSG00000229358	rs12701233	26904	-147555	0.169873	756	830	0.00987795	0.0970605	0.0375898	0.0102429	-0.0607641	0.023648	1.68883e-09	0.229897	0.03801	605	1.02174e-06	4.06083e-05	Other	-	Positive
Ast	ENSG00000122643	rs1609409	66695	18012	0.222063	965	1085	1.81588e-16	0.280484	0.0338256	0.0124009	-0.0618704	0.0247246	1.04163e-06	0.166126	0.0339304	552	0.000574977	0.00877354	PCG	NT5C3A	Positive
Ast	ENSG00000241057	rs4454202	62566	50833	0.110725	514	541	2.65153e-25	0.468857	0.0446069	0.00836567	-0.0574289	0.0217608	1.83253e-10	0.291084	0.0454673	513	9.40087e-08	5.02065e-06	Other	-	Positive
Ast	ENSG00000122679	rs1294918	31384	2873	0.253582	1078	1239	0.00146858	-0.103701	0.0325649	0.00692271	0.0713207	0.0263873	2.39237e-06	-0.15821	0.0334599	546	0.00130624	0.0165671	PCG	RAMP3	Positive
Ast	BrainMetalnc.69044	rs10235558	-99917	-114426	0.474212	1779	2317	3.36824e-35	0.351132	0.0279163	0.000218798	-0.119717	0.0323401	1.52363e-06	0.133783	0.0277557	553	0.000842568	0.0121004	LncRNA	ADCY1	Positive
Ast	BrainMetalnc.69097	rs2708875	-2711	-14081	0.464388	1743	2269	1.20953e-08	-0.162418	0.0284048	0.000330615	0.119848	0.033336	6.60114e-07	-0.141231	0.0283261	674	0.000444917	0.00722053	LncRNA		Positive
Ast	ENSG00000178665	rs872294	1319	-53755	0.183995	810	899	5.99511e-20	-0.330674	0.0358481	0.0450191	0.0482806	0.024074	4.40889e-06	-0.163784	0.0355935	520	0.00229262	0.0239689	PCG	ZNF713	Positive
Ast	ENSG00000173041	rs56351418	-13583	-56780	0.265657	1114	1298	1.96514e-109	-0.674819	0.0288361	3.01969e-06	0.110206	0.0235461	7.26142e-06	-0.1323	0.0294288	309	0.00224378	0.0238175	PCG	ZNF680	Positive
Ast	ENSG00000127948	rs6954252	331191	243561	0.228612	987	1117	0.000213183	0.125133	0.0337428	0.0316308	-0.0539218	0.0250766	2.48365e-06	0.158212	0.0335146	434	0.0010779	0.014505	PCG	POR	Positive
Ast	BrainMetalnc.69827	rs549113981	-33065	-523223	0.434711	1652	2124	0.00300674	0.0840147	0.0282875	3.06013e-08	-0.176486	0.031765	2.69993e-13	0.206957	0.0281592	691	1.86565e-10	2.1256e-08	LncRNA		Positive
Ast	ENSG00000186704	rs7799234	-472531	-498222	0.357552	1408	1747	0.000348919	-0.103818	0.028991	0.000507936	0.100616	0.0289027	2.73451e-06	-0.137654	0.0292826	461	0.00126061	0.0162342	Other	-	Positive
Ast	BrainMetalnc.69924	rs35985094	113047	-2907	0.383545	1531	1874	9.22801e-34	0.354898	0.0288611	0.000178201	-0.110837	0.0295263	1.1708e-06	0.1387	0.0284641	622	0.000728237	0.0106372	LncRNA	CACNA2D1	Positive
Ast	BrainMetalnc.70093	rs7793743	138867	133397	0.424478	1644	2074	1.41842e-05	-0.125645	0.028885	3.60966e-06	0.144072	0.0310274	1.19099e-09	-0.171254	0.0280504	451	5.37135e-07	2.29491e-05	LncRNA	CFAP69	Positive
Ast	BrainMetalnc.70389	rs762845805	33350	30970	0.412403	1582	2015	0	1.13288	0.017057	5.31982e-06	-0.0845619	0.0185365	4.8709e-12	0.118963	0.0171319	267	1.30053e-09	1.1113e-07	LncRNA	TRIM4	Positive
Ast	BrainMetalnc.70390	rs2572024	-10821	-12861	0.405853	1571	1983	0	1.02959	0.0199373	3.39556e-06	-0.100062	0.0214906	1.03343e-10	0.13032	0.0200789	270	2.79026e-08	1.58952e-06	LncRNA	TRIM4	Positive
Ast	ENSG00000146833	rs2527926	-10502	-39630	0.413631	1589	2021	0.0353614	-0.0598203	0.0284132	1.60266e-09	0.186988	0.0308719	2.44805e-12	-0.200824	0.0285166	278	6.80557e-10	6.46151e-08	PCG	TRIM4	Positive
Ast	ENSG00000214309	rs7806537	340311	338601	0.376996	1493	1842	0.0177475	0.0696553	0.02936	0.00097561	-0.0991002	0.0300168	1.33563e-05	0.131608	0.0301639	328	0.00438086	0.0399054	PCG	MBLAC1	Positive
Ast	ENSG00000146830	rs2075668	-103649	-118392	0.242939	1040	1187	0.000359167	-0.118092	0.0330474	0.00231632	0.0778324	0.0255224	1.49881e-06	-0.159148	0.0329954	471	0.000705941	0.0104005	PCG	GIGYF1	Positive
Ast	BrainMetalnc.70453	rs11772849	18943	16987	0.240892	1036	1177	1.70314e-15	-0.263905	0.0329301	0.00557669	0.0695072	0.0250553	4.43689e-06	-0.15416	0.0335116	476	0.00211196	0.023286	LncRNA	GIGYF1	Positive
Ast	ENSG00000005075	rs3800985	-25278	-31016	0.37413	1479	1828	0.000451699	-0.102759	0.0292538	0.000164835	0.116789	0.0309501	3.61848e-06	-0.134247	0.0289148	433	0.0015668	0.0185967	PCG	POLR2J	Positive
Ast	BrainMetalnc.70701	rs6466390	53301	-40422	0.386819	1538	1890	1.51099e-06	-0.141951	0.0294401	0.000146585	0.115092	0.030265	1.33013e-07	-0.155488	0.0293914	441	5.86588e-05	0.00137326	LncRNA	DOCK4	Positive
Ast	BrainMetalnc.70971	rs3808087	-49074	-148038	0.13774	632	673	2.30912e-18	-0.362284	0.0411178	0.00467788	0.0635077	0.0224327	6.19276e-07	-0.20925	0.0418638	460	0.000284867	0.00491755	LncRNA	SND1	Positive
Ast	BrainMetalnc.70990	rs10488627	180101	43305	0.347114	1397	1696	0.000706612	0.100879	0.0297461	0.000143258	-0.109999	0.0288825	9.57783e-08	0.160822	0.0300561	547	5.23907e-05	0.0013398	LncRNA		Positive
Ast	ENSG00000064419	rs7455711	108192	7199	0.328899	1348	1607	0.0451253	0.0607964	0.0303298	1.47625e-07	-0.149191	0.0283044	1.25431e-11	0.2044	0.0300301	629	7.88959e-09	5.31295e-07	PCG	TNPO3	Positive
Ast	BrainMetalnc.71046	rs56085705	100912	-108638	0.0871879	405	426	4.54609e-08	0.275871	0.0502902	0.0666063	-0.0400374	0.021817	4.39663e-06	0.232201	0.0504555	654	0.0028754	0.028405	LncRNA	UBE2H	Positive
Ast	ENSG00000128607	rs13226577	65450	279	0.193819	859	947	9.29069e-05	0.141438	0.0361278	0.00369486	-0.0707857	0.0243592	3.74269e-06	0.171772	0.0370532	647	0.00242152	0.024908	PCG	KLHDC10	Positive
Ast	ENSG00000231721	rs205780	26438	-140935	0.411789	1605	2012	0.000886374	-0.0967702	0.0290739	7.71204e-05	0.129913	0.0328068	1.07187e-06	-0.142829	0.0292061	774	0.000829624	0.0120155	LncRNA	LINC-PINT	Positive
Ast	BrainMetalnc.71413	rs12533304	-38946	-40997	0.493451	1832	2411	6.90945e-09	0.166881	0.0287049	0.000945755	-0.112685	0.0340414	1.04024e-05	0.124245	0.0281232	422	0.00438982	0.0399054	LncRNA	SSBP1	Positive
Ast	ENSG00000127364	rs1285956	113217	108200	0.473189	1775	2312	6.84201e-40	0.371442	0.0275951	6.57335e-09	-0.185983	0.0319441	1.13127e-13	0.202151	0.0270707	420	4.75133e-11	6.76669e-09	PCG	TAS2R4	Positive
Ast	ENSG00000188707	rs998920	567	-9515	0.175194	792	856	0.00732762	-0.102119	0.0380498	0.00491587	0.0682125	0.0242312	2.9517e-06	-0.179474	0.0383073	734	0.00216655	0.0235166	PCG	ZBED6CL	Positive
Ast	BrainMetalnc.71819	rs3807267	-916	-2221	0.369218	1466	1804	1.866e-08	-0.164656	0.0291795	8.18625e-05	0.119116	0.03019	5.05952e-08	-0.156839	0.0286915	1225	6.19791e-05	0.0014123	LncRNA	DPP6	Positive
Ast	ENSG00000218672	rs4716539	20545	6265	0.45702	1702	2233	5.28101e-204	-0.782769	0.0232784	0.000184478	0.101182	0.0270169	6.76607e-07	-0.116278	0.023344	1270	0.000859291	0.0122377	LncRNA	AC008060.1	Positive
Ast	BrainMetalnc.71974	rs4909189	16630	1914	0.268932	1161	1314	1.10534e-93	0.646896	0.0301515	1.00844e-06	-0.119398	0.0243546	9.80979e-12	0.211755	0.0309473	903	8.85824e-09	5.60694e-07	LncRNA	PTPRN2	Positive
Ast	ENSG00000117868	rs71547571	75052	-24206	0.111543	506	545	1.62094e-33	0.528981	0.043188	0.000858859	-0.0730401	0.0218864	1.84844e-06	0.202427	0.0423403	708	0.00130869	0.0165671	PCG	ESYT2	Positive
Ast	ENSG00000126870	rs842706	6285	-93904	0.222677	958	1088	1.14182e-12	-0.239955	0.0335601	0.00156004	0.0785593	0.0248068	6.8934e-07	-0.164485	0.0330462	616	0.000424634	0.00704271	PCG	DYNC2I1	Positive
Ex	ENSG00000244486	rs1638038	-3792	-17031	0.357348	1445	1746	1.84719e-25	0.310163	0.0294093	0.000737549	-0.0977013	0.0289098	2.24805e-06	0.13956	0.0294363	546	0.00122743	0.0141533	PCG	SCARF2	Positive
Ex	ENSG00000183506	rs4820591	-709198	-753696	0.452927	1698	2213	1.5368e-205	0.78132	0.0231296	4.58304e-12	-0.185033	0.0266131	9.74905e-25	0.238507	0.0229735	636	6.20039e-22	1.20443e-19	Other	-	Positive
Ex	ENSG00000224086	rs240066	38	-39009	0.480557	1768	2348	0	-1.01716	0.0190963	6.32928e-12	0.158912	0.0230103	1.35048e-22	-0.18955	0.0191865	782	1.05608e-19	1.64114e-17	LncRNA	PPM1F-AS1	Positive
Ex	BrainMetalnc.48185	rs9619903	8638	-3440	0.247237	1058	1208	7.87353e-30	-0.367077	0.0319273	1.79545e-08	0.141367	0.0250227	5.6457e-15	-0.256026	0.0325668	719	4.05926e-12	3.5045e-10	LncRNA		Positive
Ex	BrainMetalnc.48187	rs10154755	26266	25504	0.169259	765	827	4.78594e-80	0.707578	0.0359783	0.0606983	-0.041693	0.0222179	2.70923e-06	0.168905	0.0359157	716	0.00193981	0.0188626	LncRNA		Positive
Ex	BrainMetalnc.48186	rs11704294	3340	1462	0.164552	750	804	6.16564e-88	-0.752976	0.0363502	0.013043	0.0545115	0.0219414	5.69522e-08	-0.19637	0.0360635	721	4.10625e-05	0.000709013	LncRNA		Positive
Ex	BrainMetalnc.48213	rs1807460	8959	-2489	0.488743	1811	2388	3.37167e-101	-0.58424	0.0260847	1.98646e-06	0.155088	0.0325383	9.49286e-08	-0.141022	0.0263478	952	9.0372e-05	0.00143304	LncRNA		Positive
Ex	ENSG00000186716	rs12163260	140780	2447	0.372493	1499	1820	1.78022e-233	-0.870822	0.0238349	1.29653e-19	0.212484	0.0232518	7.6275e-26	-0.254317	0.0239177	967	7.37579e-23	1.91033e-20	PCG	BCR	Positive
Ex	BrainMetalnc.48232	rs71318929	106008	-30748	0.185428	835	906	4.65261e-183	-0.992388	0.0315013	0.00708447	0.055428	0.020566	2.7128e-07	-0.16005	0.0310361	826	0.000224077	0.00322422	LncRNA	RGL4	Positive
Ex	ENSG00000272578	rs9624259	-8306	-67568	0.185837	838	908	1.26048e-33	-0.443324	0.0361308	0.00028693	0.0859573	0.0236661	4.67202e-11	-0.234938	0.0355373	797	3.7236e-08	1.11278e-06	Other	-	Positive
Ex	ENSG00000133433	rs5996632	-29484	-33265	0.179902	795	879	1.41655e-253	1.12174	0.0291513	0.0612505	-0.0354674	0.0189407	1.24345e-11	0.190101	0.0279241	701	8.71657e-09	2.82199e-07	PCG	GSTT2B	Positive
Ex	ENSG00000184674	rs2262477	-37276	-45744	0.476259	1775	2327	0	-1.0449	0.0190806	5.47606e-10	0.142203	0.0228254	5.40671e-14	-0.143953	0.0190255	726	3.92527e-11	2.54161e-09	PCG	KNOWN	Positive
Ex	BrainMetalnc.48309	rs5760686	50370	-79346	0.148997	658	728	8.68226e-10	0.238312	0.0387105	0.0152651	-0.0563584	0.0232143	1.9036e-07	0.198041	0.037913	797	0.000151717	0.00231145	LncRNA	SGSM1	Positive
Ex	BrainMetalnc.48340	rs6004655	11557	-18560	0.0665166	316	325	1.18894e-89	1.10179	0.0526231	0.000637823	-0.0673267	0.0196894	1.85145e-13	0.377369	0.0509895	903	1.67186e-10	9.2788e-09	LncRNA		Positive
Ex	ENSG00000100058	rs5996945	31501	-41248	0.0665166	316	325	4.00009e-10	0.353736	0.0563289	0.00051298	-0.0733475	0.0210857	8.28731e-21	0.512519	0.0542838	913	7.56632e-18	9.79838e-16	Other	-	Positive
Ex	ENSG00000100109	rs12628373	17350	-3924	0.128531	586	628	2.23344e-07	0.219623	0.0422875	0.0451684	-0.0456282	0.0227673	1.53919e-06	0.196752	0.0408371	1171	0.00180239	0.0179546	PCG	TFIP11	Positive
Ex	ENSG00000206028	rs4822768	7093	6629	0.400941	1558	1959	0.0191572	0.0676559	0.0288632	0.000636189	-0.105195	0.0307576	1.23223e-06	0.139339	0.0286552	1269	0.00156371	0.0164189	LncRNA	Z99774.1	Positive
Ex	ENSG00000100154	rs6519752	530179	-171672	0.149202	668	729	0.0273425	-0.0873482	0.0395613	0.107054	0.0371094	0.0230183	5.06364e-06	-0.188002	0.0411172	1066	0.00539784	0.0455883	PCG	TTC28	Positive
Ex	BrainMetalnc.48457	rs7290684	55850	20430	0.173966	780	850	2.44009e-218	-1.06532	0.0303931	2.21616e-14	0.14929	0.0194284	2.89359e-27	-0.338544	0.0309228	411	1.18927e-24	4.6203e-22	LncRNA	RFPL1	Positive
Ex	ENSG00000225465	rs7290684	24846	-16500	0.173966	780	850	8.28777e-248	-1.11793	0.0294775	2.17353e-16	0.155834	0.0188432	7.69418e-33	-0.363302	0.0299913	421	3.23925e-30	2.5169e-27	Other	-	Positive
Ex	ENSG00000184117	rs9613968	29518	2999	0.455997	1728	2228	2.54079e-78	-0.521622	0.0268429	8.6475e-05	0.123195	0.0313289	6.27297e-06	-0.122865	0.0271411	441	0.00276638	0.0249939	PCG	NIPSNAP1	Positive
Ex	ENSG00000187860	rs35289401	12002	-8192	0.333606	1348	1630	6.99368e-16	-0.240235	0.029565	0.000351794	0.101489	0.0283578	5.80126e-06	-0.134805	0.0296697	463	0.00268598	0.024553	PCG	CCDC157	Positive
Ex	BrainMetalnc.48502	rs2299825	6644	-2557	0.227384	980	1111	6.37734e-07	-0.168029	0.0336555	0.00537491	0.0715788	0.0256908	6.00558e-06	-0.152144	0.0335401	443	0.00266047	0.024553	LncRNA	SEC14L2	Positive
Ex	ENSG00000100036	rs5753235	-22391	-55626	0.423659	1642	2070	0.00148585	0.0924204	0.0290534	0.000617713	-0.110219	0.0321509	1.22986e-05	0.124503	0.0284173	444	0.00546059	0.0456223	PCG	SLC35E4	Positive
Ex	ENSG00000184792	rs757029	-13279	-227321	0.338518	1381	1654	0.0128413	-0.0754342	0.0302952	0.000365598	0.103869	0.0291051	1.72626e-06	-0.145227	0.0302884	462	0.000797532	0.00999488	PCG	OSBP2	Positive
Ex	BrainMetalnc.48525	rs1017066	144273	117753	0.274253	1149	1340	8.69993e-18	-0.270497	0.0312488	0.000955662	0.086108	0.0260357	4.07259e-07	-0.156942	0.0308977	434	0.000176751	0.00264106	LncRNA		Positive
Ex	ENSG00000241878	rs761746	11338	-32505	0.290831	1212	1421	1.45515e-110	0.664889	0.0282479	9.08081e-05	-0.0982675	0.0250652	6.65905e-08	0.154696	0.0285581	606	4.03539e-05	0.000709013	PCG	PISD	Positive
Ex	BrainMetalnc.48648	rs5749687	73781	-43257	0.418133	1606	2043	2.63162e-53	-0.427268	0.027127	1.24911e-08	0.166339	0.0291188	9.85699e-14	-0.202173	0.0270067	672	6.6239e-11	3.95905e-09	LncRNA	LARGE1	Positive
Ex	BrainMetalnc.48668	rs9610109	2732	-243758	0.315186	1318	1540	3.69111e-130	-0.714058	0.0276558	2.45332e-06	0.115958	0.0245508	8.40717e-11	-0.182063	0.0279153	700	5.88502e-08	1.69358e-06	LncRNA		Positive
Ex	ENSG00000286592	rs9610109	2637	-243548	0.315186	1318	1540	7.58817e-185	-0.831815	0.0262514	8.84586e-08	0.125032	0.0233041	2.03396e-12	-0.187304	0.0264978	701	1.4258e-09	5.83079e-08	LncRNA	LINC02885	Positive
Ex	ENSG00000128335	rs5756111	13501	-244	0.386205	1499	1887	3.58655e-219	-0.819064	0.0233129	6.46304e-10	0.152945	0.0246542	8.00358e-15	-0.183533	0.0234799	874	6.99513e-12	4.9411e-10	PCG	APOL2	Positive
Ex	BrainMetalnc.48717	rs75416875	366	-29977	0.0804339	378	393	1.57307e-54	0.796733	0.0499645	0.010815	-0.052653	0.0206435	1.29049e-06	0.250711	0.0516571	934	0.00120532	0.0141533	LncRNA	FOXRED2	Positive
Ex	ENSG00000100350	rs80201620	-31234	-51087	0.0800246	376	391	6.19965e-90	1.01423	0.0483567	0.00119768	-0.0645465	0.0199018	4.85151e-08	0.275646	0.0503561	914	4.43428e-05	0.000749008	PCG	FOXRED2	Positive
Ex	ENSG00000100360	rs5756343	27342	9288	0.24826	1059	1213	7.37581e-86	0.618548	0.0302582	5.65666e-08	-0.127168	0.0233493	3.35535e-13	0.219754	0.0300219	875	2.93593e-10	1.34189e-08	PCG	IFT27	Positive
Ex	ENSG00000133466	rs4821594	-2359	-21578	0.203029	890	992	5.07363e-101	-0.721742	0.0322555	0.0125654	0.0572472	0.0229199	4.5278e-08	-0.164814	0.030041	863	3.90749e-05	0.000706075	PCG	C1QTNF6	Positive
Ex	ENSG00000288106	rs5757356	17878	921	0.373516	1481	1825	8.63434e-27	0.308258	0.0284273	1.14725e-11	-0.199675	0.0292796	1.91342e-17	0.243357	0.0284191	562	1.07534e-14	1.19363e-12	LncRNA	AL022318.5	Positive
Ex	ENSG00000100372	rs138346	82304	32535	0.352845	1422	1724	2.83478e-07	0.153061	0.029729	0.00285568	-0.0885525	0.029657	7.66085e-06	0.13188	0.0294106	261	0.00199948	0.0191802	PCG	SLC25A17	Positive
Ex	ENSG00000100413	rs9607812	19440	633	0.199959	859	977	3.22698e-149	0.848282	0.030368	0.0694252	-0.0382018	0.0210311	3.46958e-06	0.142812	0.0307016	357	0.00123864	0.0141533	PCG	POLR3H	Positive
Ex	ENSG00000205704	rs2187960	177	-6582	0.0607859	286	297	5.78795e-85	-1.11245	0.0547352	0.00234755	0.0598915	0.0196654	9.43525e-08	-0.297796	0.0556269	484	4.56666e-05	0.000754957	PCG	LINC00634	Positive
Ex	ENSG00000100197	rs133348	-94552	-98918	0.469095	1746	2292	1.15456e-67	-0.47784	0.0266428	6.49527e-05	0.12313	0.0307747	1.21808e-07	-0.141731	0.0267088	518	6.30968e-05	0.00102138	PCG	CYP2D6	Positive
Ex	ENSG00000205702	rs55644935	129855	125491	0.208146	908	1017	2.20711e-47	0.495172	0.0335124	0.00131019	-0.0781371	0.0242852	9.5514e-09	0.191533	0.0332608	521	4.97628e-06	0.000113723	Other	-	Positive
Ex	ENSG00000100243	rs137124	1870	-29682	0.182562	796	892	5.95338e-29	-0.39751	0.0351411	1.96235e-05	0.1002	0.0234246	1.3331e-12	-0.244939	0.0343617	761	1.01449e-09	4.37921e-08	PCG	CYB5R3	Positive
Ex	BrainMetalnc.49086	rs5759126	70179	-28349	0.421203	1621	2058	2.37629e-145	-0.692794	0.0251819	5.1481e-06	0.125278	0.02742	1.07731e-07	-0.132445	0.024853	929	0.000100082	0.00155527	LncRNA	TTLL1	Positive
Ex	ENSG00000100271	rs2005983	-10097	-53106	0.399099	1556	1950	0.00214855	0.088336	0.0287536	1.80821e-08	-0.172105	0.0304701	2.25667e-13	0.213121	0.0289017	904	2.04003e-10	1.05674e-08	PCG	TTLL1	Positive
Ex	ENSG00000100294	rs2076079	-7952	-19141	0.325829	1316	1592	1.7019e-32	-0.349604	0.0290263	7.00612e-06	0.121541	0.0269895	1.26266e-10	-0.193454	0.0299482	964	1.21721e-07	3.15256e-06	PCG	MCAT	Positive
Ex	ENSG00000100304	rs47340	201	-20311	0.416496	1618	2035	6.00786e-76	0.517373	0.0270785	0.000139617	-0.108343	0.0283998	7.19583e-09	0.150636	0.0259413	989	7.11668e-06	0.000153602	PCG	TTLL12	Positive
Ex	ENSG00000100341	rs138129	547	-11788	0.459476	1718	2245	5.32175e-98	-0.569351	0.0258798	9.63877e-06	0.13574	0.0306101	2.20207e-07	-0.134923	0.0259655	1346	0.000296399	0.00411253	PCG	PNPLA5	Positive
Ex	ENSG00000280434	rs133915	-11048	-25309	0.449857	1705	2198	2.88434e-07	0.146944	0.0285592	7.88603e-05	-0.129293	0.0326946	8.69194e-07	0.139498	0.0282849	1446	0.00125685	0.0141533	LncRNA		Positive
Ex	BrainMetalnc.49169	rs2138152	143962	25044	0.396848	1540	1939	7.08687e-30	-0.321871	0.0279721	7.17563e-07	0.150851	0.0303549	8.20106e-11	-0.184303	0.0282424	1536	1.25968e-07	3.15733e-06	LncRNA	NUP50	Positive
Ex	ENSG00000226328	rs9615045	17054	-13707	0.490995	1806	2399	2.54563e-34	-0.340072	0.0274101	2.12432e-09	0.20357	0.0338679	3.19519e-12	-0.194088	0.0277093	1447	4.62343e-09	1.71067e-07	LncRNA	NUP50-DT	Positive
Ex	ENSG00000128408	rs5765365	27303	8488	0.499591	1845	2441	1.12297e-269	0.897663	0.0224302	0.000147464	-0.106942	0.0281329	2.5639e-06	0.104568	0.0221817	1282	0.00328692	0.0286675	PCG	RIBC2	Positive
Ex	ENSG00000182257	rs6520000	-680	-5346	0.406467	1580	1986	0.0146019	-0.0706683	0.0289168	0.000178962	0.115933	0.0308924	1.42156e-06	-0.13901	0.0287569	1091	0.00155093	0.0164189	LncRNA	PRR34	Positive
Ex	BrainMetalnc.49250	rs5769136	-1000	-1757	0.342202	1397	1672	7.2993e-263	-0.933485	0.0237105	7.47268e-09	0.133318	0.0229843	5.2908e-12	-0.167001	0.0240912	1043	5.51831e-09	1.86423e-07	LncRNA		Positive
Ex	ENSG00000260708	rs5769136	-1088	-1757	0.342202	1397	1672	7.68049e-263	-0.933443	0.0237107	6.97428e-09	0.133589	0.0229845	5.05682e-12	-0.16716	0.0240914	1043	5.27426e-09	1.86277e-07	LncRNA	AL118516.1	Positive
Ex	ENSG00000054611	rs2207680	412030	-798	0.417519	1618	2040	4.08778e-34	-0.347041	0.0280631	2.18512e-05	0.130691	0.0307265	5.35843e-09	-0.163875	0.0279808	1298	6.95525e-06	0.000153602	PCG	TBC1D22A	Positive
Ex	BrainMetalnc.49281	rs6007702	-7836	-10444	0.456815	1728	2232	1.14295e-60	0.458611	0.0271392	2.77181e-06	-0.14661	0.0312062	2.59906e-10	0.173303	0.027302	1161	3.01751e-07	7.32689e-06	LncRNA		Positive
Ex	ENSG00000287225	rs7284558	15105	-84	0.322145	1328	1574	0	1.08162	0.0216357	4.11953e-05	-0.0821605	0.0199993	3.71274e-07	0.111404	0.0218562	1746	0.000648245	0.00825716	LncRNA	Z84468.2	Positive
Ex	ENSG00000188511	rs1807675	259821	16804	0.382521	1521	1869	1.7609e-18	-0.2572	0.0290878	0.000669896	0.103122	0.0302765	5.19049e-07	-0.145619	0.0289349	1732	0.000898993	0.0109143	LncRNA	C22orf34	Positive
Ex	ENSG00000182858	rs138876	-80195	-98404	0.19955	870	975	1.73746e-24	0.356935	0.0345731	0.00989011	-0.0622406	0.0241086	1.09263e-06	0.169352	0.0346565	1336	0.00145975	0.0159751	PCG	ALG12	Positive
Ex	BrainMetalnc.49391	rs138222	-77856	-79674	0.0929185	421	454	8.11461e-105	0.989151	0.0433031	0.00430818	-0.0574034	0.0200898	6.23665e-11	0.278777	0.0424487	1029	6.41751e-08	1.78086e-06	LncRNA	TRABD	Positive
Ex	BrainMetalnc.49392	rs137922	-127138	-129685	0.0931232	427	455	8.49962e-107	1.0123	0.0438538	0.0309134	-0.0433153	0.0200586	2.44861e-06	0.203812	0.0431477	1017	0.00249024	0.0235965	LncRNA	TRABD	Positive
Ex	ENSG00000128159	rs2294402	-1690	-29024	0.405444	1572	1981	1.50377e-112	0.617985	0.0259933	7.91704e-06	-0.125433	0.0280171	3.70364e-07	0.130175	0.0255365	996	0.000368883	0.004858	PCG	TUBGCP6	Positive
Ex	ENSG00000188130	rs5771276	4934	-7583	0.320098	1273	1564	9.75794e-283	0.932141	0.0225915	2.16504e-06	-0.101115	0.0212929	1.86201e-11	0.15407	0.0228308	922	1.71677e-08	5.33572e-07	PCG	MAPK12	Positive
Ex	BrainMetalnc.49404	rs28607359	-20672	-35259	0.273639	1141	1337	0.00570914	0.0871138	0.031489	0.0031231	-0.0774871	0.0261931	2.0232e-06	0.150221	0.0315418	832	0.0016833	0.0172458	LncRNA	DENND6B	Positive
Ex	ENSG00000205559	rs131748	3382	-9226	0.407081	1604	1989	4.60005e-90	0.572032	0.0272517	0.00167701	-0.0921714	0.029301	2.73395e-06	0.1258	0.0267607	617	0.00168685	0.0172458	LncRNA	CHKB-DT	Positive
Ex	ENSG00000275835	rs62008153	-4111	-60491	0.0849366	398	415	1.18914e-49	-0.744609	0.0491322	0.00888396	0.0550889	0.0210376	6.15344e-06	-0.216121	0.0476983	387	0.00238138	0.0364351	PCG	TUBGCP5	Positive
Ex	ENSG00000182636	rs1094836	89833	87928	0.499795	1815	2442	6.12629e-37	-0.35006	0.0271126	3.84989e-08	0.182009	0.0330011	2.60597e-10	-0.171426	0.0270082	685	1.78509e-07	1.45663e-05	PCG	NDN	Positive
Ex	BrainMetalnc.24007	rs12438521	6572	-501649	0.100082	460	489	2.69366e-18	0.406391	0.0462172	0.0572728	-0.0415941	0.0218672	6.2871e-09	0.273603	0.0469327	477	2.99895e-06	0.000141181	LncRNA		Positive
Ex	BrainMetalnc.24038	rs147640329	182471	75403	0.0685632	327	335	6.84526e-35	0.695889	0.0555901	0.0499853	-0.0413973	0.0211096	3.82865e-06	0.245117	0.0529286	544	0.00208279	0.0339911	LncRNA	GOLGA8H	Positive
Ex	ENSG00000137806	rs1899	9816	-12369	0.259108	1108	1266	2.56336e-189	-0.872316	0.0271383	1.24538e-16	0.180058	0.0215947	7.37511e-27	-0.296976	0.0273488	427	3.14917e-24	1.92729e-21	PCG	NDUFAF1	Positive
Ex	ENSG00000103932	rs7178957	8288	-18805	0.476668	1747	2329	1.58267e-103	0.57678	0.025426	0.00123336	-0.0986196	0.0304867	6.25334e-06	0.115027	0.0254059	421	0.00263266	0.0388238	PCG	RPAP1	Positive
Ex	BrainMetalnc.24425	rs7183231	37239	5829	0.395415	1530	1932	6.91631e-40	0.372529	0.0276776	3.92573e-05	-0.123055	0.0298723	3.05962e-07	0.142443	0.0277447	414	0.000126668	0.00355228	LncRNA	TYRO3	Positive
Ex	ENSG00000140265	rs34212866	52594	39741	0.2237	988	1093	1.06125e-52	0.522089	0.0333533	0.00464382	-0.0688623	0.024304	1.20864e-05	0.14852	0.0338694	203	0.00245353	0.0370756	PCG	ZSCAN29	Positive
Ex	ENSG00000138606	rs7167326	76177	42216	0.32849	1330	1605	1.51223e-90	-0.579852	0.0275425	3.66136e-07	0.133409	0.0261597	4.83765e-11	-0.179619	0.0271911	356	1.7222e-08	1.75665e-06	PCG	SHF	Positive
Ex	BrainMetalnc.24725	rs2445763	-15996	-29536	0.0607859	292	297	2.55662e-10	0.382044	0.0601626	0.000210751	-0.0783027	0.021098	2.61167e-15	0.475951	0.059793	368	9.61096e-13	1.96064e-10	LncRNA	GLDN	Positive
Ex	BrainMetalnc.24741	rs9944235	12210	4833	0.403807	1568	1973	9.11793e-12	-0.196251	0.0286366	0.000386568	0.106877	0.0300719	1.34502e-06	-0.137165	0.0283102	396	0.000532627	0.0118534	LncRNA	TMOD2	Positive
Ex	BrainMetalnc.24765	rs55741208	1744	-1359	0.370856	1468	1812	2.37288e-68	0.497967	0.0276122	0.00596098	-0.0763313	0.0277333	4.67243e-06	0.125977	0.02745	484	0.00226146	0.0350383	LncRNA	GNB5	Positive
Ex	ENSG00000047346	rs56223224	16134	-112362	0.0923045	432	451	5.71431e-10	-0.305068	0.0490208	0.0571132	0.0418653	0.0219957	7.46931e-09	-0.284297	0.0490127	551	4.11559e-06	0.00017991	PCG	FAM214A	Positive
Ex	ENSG00000225973	rs1244785428	-3169	-4915	0.155751	686	761	1.088e-05	-0.167853	0.0380783	0.003064	0.0692762	0.0233709	1.71368e-10	-0.245762	0.0383257	615	1.05391e-07	9.21421e-06	PCG	PIGBOS1	Positive
Ex	BrainMetalnc.24831	rs55924913	-118523	-122561	0.106631	483	521	4.91334e-39	0.583785	0.0438831	0.262983	-0.0239362	0.0213788	6.74924e-06	0.20701	0.0458872	520	0.0035096	0.0488154	LncRNA		Positive
Ex	BrainMetalnc.24982	rs1346035	-182901	-186350	0.448424	1709	2191	8.84442e-17	0.238616	0.0284759	0.000331085	-0.11545	0.0321158	3.17539e-06	0.133091	0.0284991	961	0.00305155	0.0434313	LncRNA	VPS13C	Positive
Ex	ENSG00000140416	rs6494387	10695	-18588	0.325215	1330	1589	4.29698e-13	0.218753	0.0300246	0.002322	-0.0845925	0.0277459	4.9611e-09	0.180162	0.0306938	739	3.66625e-06	0.000166203	PCG	TPM1	Positive
Ex	BrainMetalnc.25045	rs7170689	146152	108140	0.123209	550	602	1.47825e-49	-0.608362	0.0401836	9.81962e-05	0.0843075	0.0216091	1.13288e-13	-0.292599	0.039184	521	5.90229e-11	1.03206e-08	LncRNA	HERC1	Positive
Ex	ENSG00000035664	rs12912128	137959	-27038	0.185632	810	907	4.48645e-40	0.472395	0.0350079	0.0312002	-0.0510695	0.0236898	6.27294e-06	0.15726	0.034739	476	0.00298592	0.0429973	PCG	DAPK2	Positive
Ex	BrainMetalnc.25203	rs7163787	-13407	-25375	0.213467	946	1043	1.31892e-12	-0.24929	0.0349647	0.000729073	0.0830625	0.024555	9.90542e-09	-0.20805	0.0361681	621	6.15127e-06	0.000253166	LncRNA	MAP2K5	Positive
Ex	ENSG00000067221	rs11072465	40016	24320	0.446991	1695	2184	1.88727e-105	0.595317	0.0259739	0.000726905	-0.101581	0.0300221	6.03396e-07	0.129842	0.0259506	428	0.000258253	0.00619808	PCG	STOML1	Positive
Ex	ENSG00000137868	rs12911385	22079	-10600	0.330536	1351	1615	2.10707e-62	0.491969	0.0286696	0.000168004	-0.102866	0.027295	3.28268e-07	0.147998	0.0289022	424	0.000139186	0.00378585	PCG	STRA6	Positive
Ex	ENSG00000178802	rs11072507	-127480	-137466	0.350798	1435	1714	4.78186e-53	-0.456534	0.0290619	0.0023194	0.0869809	0.0285261	3.83779e-06	-0.132252	0.0285605	391	0.00150058	0.0266189	PCG	MPI	Positive
Ex	ENSG00000140365	rs112882444	248953	241749	0.249284	1053	1218	3.76399e-13	0.234976	0.0321708	0.00174534	-0.0806922	0.0257479	1.05991e-05	0.139612	0.0316307	331	0.00350829	0.0488154	PCG	COMMD4	Positive
Ex	ENSG00000167196	rs334930	153895	116836	0.15616	720	763	2.56221e-58	-0.634124	0.0383414	0.0190276	0.0533036	0.0227157	2.00163e-08	-0.212865	0.037805	310	6.20504e-06	0.000253166	PCG	FBXO22	Positive
Ex	ENSG00000169752	rs12910576	19654	-97629	0.153909	713	752	0	-1.42684	0.0290691	0.087822	0.0290804	0.0170291	7.37406e-07	-0.141909	0.0285864	349	0.000257355	0.00619808	PCG	NRG4	Positive
Ex	BrainMetalnc.25585	rs11633318	-162308	-165899	0.389275	1547	1902	0.000544333	-0.101958	0.029446	1.39296e-05	0.130893	0.0300638	5.00614e-10	-0.186532	0.0298724	462	2.31284e-07	1.76932e-05	LncRNA	HMG20A	Positive
Ex	ENSG00000259362	rs1049847915	-19455	-28025	0.105813	493	517	2.95597e-14	0.353385	0.0462167	0.0621812	-0.041151	0.0220547	4.42676e-06	0.215319	0.0468015	462	0.00204516	0.0338281	LncRNA	AC046168.1	Positive
Ex	ENSG00000166426	rs4887035	939	-3787	0.331355	1327	1619	1.57857e-51	-0.436642	0.0282372	1.47656e-05	0.116235	0.0267765	1.17839e-10	-0.181607	0.0280679	682	8.03663e-08	7.5668e-06	PCG	CRABP1	Positive
Ex	BrainMetalnc.25645	rs12592618	-21580	-35414	0.141629	654	692	5.59206e-05	-0.16723	0.0414291	0.0016606	0.0728081	0.0231242	2.23522e-08	-0.22788	0.0406109	732	1.63618e-05	0.000589025	LncRNA		Positive
Ex	ENSG00000259234	rs4778682	69663	-72347	0.444126	1681	2170	8.08359e-64	-0.46685	0.026875	5.87162e-06	0.143944	0.0316989	1.01355e-07	-0.146955	0.0275179	803	8.13879e-05	0.00249047	LncRNA	ANKRD34C-AS1	Positive
Ex	BrainMetalnc.25718	rs55788547	-53447	-54416	0.179288	784	876	6.4814e-100	-0.745061	0.0335031	0.0489812	0.0426017	0.0216281	1.45419e-06	-0.16913	0.0350209	725	0.00105429	0.0218719	LncRNA		Positive
Ex	ENSG00000274376	rs8033050	-28902	-64974	0.348138	1402	1701	2.64601e-183	-0.793885	0.0251801	8.16031e-07	0.122218	0.0247189	3.94823e-07	-0.127106	0.0249944	411	0.000162272	0.00422598	Other	-	Positive
Ex	ENSG00000103942	rs11631378	-45001	-194208	0.154932	686	757	0.000359673	0.138006	0.0386239	0.0204742	-0.0541001	0.0233285	5.02806e-06	0.181857	0.0397602	379	0.00190563	0.0320591	PCG	HOMER2	Positive
Ex	ENSG00000275120	rs7169629	50234	14220	0.465616	1761	2275	5.50044e-37	-0.361806	0.0280031	0.000203841	0.120422	0.0323727	1.49993e-06	-0.132441	0.0274592	558	0.000836958	0.0179726	LncRNA	AC048382.5	Positive
Ex	ENSG00000166716	rs12904605	-90404	-148257	0.277528	1164	1356	0.0492102	0.0623376	0.0316797	0.00101372	-0.0878646	0.0267011	2.68348e-06	0.149061	0.031683	555	0.00148933	0.0266189	PCG	ZNF592	Positive
Ex	BrainMetalnc.25848	rs12904238	190411	7274	0.282235	1205	1379	2.38021e-14	0.244631	0.0318749	9.16334e-05	-0.101705	0.0259564	1.16146e-09	0.203788	0.0333572	632	7.34044e-07	4.9915e-05	LncRNA	PDE8A	Positive
Ex	ENSG00000259295	rs7495437	-8379	-30846	0.453541	1721	2216	8.3991e-156	0.714091	0.0249295	0.000268642	-0.102313	0.0280376	2.10108e-06	0.120633	0.0253702	628	0.00131948	0.0244703	Other	-	Positive
Ex	ENSG00000259407	rs3169120	4115	-2057	0.483831	1810	2364	9.18539e-38	0.364814	0.0279196	1.95709e-07	-0.177162	0.0339497	1.48378e-09	0.170373	0.0280705	750	1.11283e-06	6.48624e-05	LncRNA	AC021739.2	Positive
Ex	BrainMetalnc.26039	rs1973537	14960	-69312	0.30659	1280	1498	6.8273e-23	0.303249	0.0304766	1.90754e-06	-0.128256	0.0268623	2.41818e-12	0.221161	0.0313965	878	2.12317e-09	2.3625e-07	LncRNA	CRTC3	Positive
Ex	ENSG00000166965	rs8038661	3823	-3506	0.139173	638	680	7.94759e-133	0.959813	0.036745	0.0833315	-0.035821	0.0206773	4.52677e-08	0.20567	0.0374877	915	4.142e-05	0.00140828	PCG	RCCD1	Positive
Ex	BrainMetalnc.26076	rs12906515	191563	-8847	0.287352	1212	1404	1.1044e-33	0.377056	0.0307016	1.93115e-06	-0.124384	0.0260651	8.71548e-14	0.226005	0.0301237	1214	1.05806e-10	1.61883e-08	LncRNA	SLCO3A1	Positive
Ex	BrainMetalnc.26166	rs2397454	68948	-71240	0.217356	952	1062	3.3144e-113	-0.745792	0.0312662	0.000158293	0.0855646	0.0226146	6.01191e-09	-0.18155	0.031102	1071	6.43875e-06	0.000254227	LncRNA		Positive
Ex	BrainMetalnc.26297	rs1510058	26136	-114548	0.109701	500	536	1.35352e-06	-0.220501	0.0455222	0.0206797	0.0521977	0.0225448	3.36352e-07	-0.229879	0.0449331	1250	0.000420441	0.0097098	LncRNA		Positive
Ex	BrainMetalnc.26346	rs6650551	37613	-65213	0.167826	755	820	4.02067e-129	0.870348	0.0338634	0.00179376	-0.0663075	0.0212126	4.32523e-13	0.242081	0.0332306	1183	5.11675e-10	6.2629e-08	LncRNA		Positive
Ex	ENSG00000185418	rs8028684	76776	5899	0.204052	904	997	5.73962e-07	-0.177828	0.0354725	0.000708595	0.0840418	0.024787	1.36008e-09	-0.224095	0.0368356	800	1.08806e-06	6.48624e-05	PCG	TARS3	Positive
Ex	BrainMetalnc.26384	rs2029702	-3467	-4077	0.379656	1498	1855	3.42511e-37	-0.366639	0.028292	0.00100033	0.0955702	0.0290096	1.65251e-06	-0.13587	0.0282849	751	0.00124103	0.0233745	LncRNA	TARS3	Positive
Ex	ENSG00000226762	rs945796	192484	165851	0.173762	783	849	0.00965887	-0.0983638	0.0379805	0.000940742	0.0807968	0.0243972	2.03154e-06	-0.178669	0.0375217	1076	0.00218594	0.0253603	LncRNA	LINC02668	Positive
Ex	BrainMetalnc.7675	rs10904007	-1888	-18852	0.182358	802	891	8.88493e-26	0.378646	0.0356603	0.0334967	-0.0502532	0.0236232	2.03943e-07	0.177264	0.0340196	1081	0.000220462	0.00355855	LncRNA		Positive
Ex	BrainMetalnc.7677	rs7896849	437672	-36261	0.347114	1393	1696	2.71218e-90	-0.569779	0.0271062	8.38772e-10	0.160347	0.0260226	5.041e-19	-0.238364	0.0265282	1285	6.47768e-16	8.74487e-14	LncRNA		Positive
Ex	ENSG00000134461	rs36049919	35779	7489	0.370241	1477	1809	3.03061e-91	-0.575209	0.0272058	0.00011422	0.108642	0.0281128	3.77141e-06	-0.127	0.0274048	1174	0.00442763	0.0438336	PCG	ANKRD16	Positive
Ex	ENSG00000225383	rs10905835	33458	22848	0.409537	1577	2001	5.78092e-63	0.466054	0.0270271	6.08814e-05	-0.115599	0.0287819	9.02892e-09	0.152301	0.0264038	868	7.8371e-06	0.000206175	LncRNA	SFTA1P	Positive
Ex	BrainMetalnc.7828	rs2399664	22596	-64380	0.313344	1303	1531	5.14718e-43	0.417896	0.029804	4.85107e-06	-0.12193	0.0266142	2.30678e-12	0.209231	0.0296748	948	2.18683e-09	1.29898e-07	LncRNA	CELF2	Positive
Ex	BrainMetalnc.7883	rs78375658	29417	27028	0.275072	1164	1344	3.66005e-35	0.391177	0.0311174	0.00862643	-0.0698279	0.0265642	4.49201e-06	0.143901	0.0312992	1196	0.00537244	0.0496212	LncRNA	CAMK1D	Positive
Ex	BrainMetalnc.7937	rs1541009	-4757	-24379	0.108883	508	532	2.26723e-05	0.194949	0.0459239	0.0010908	-0.0738153	0.0225741	5.36486e-10	0.285817	0.0458534	1237	6.63633e-07	2.19099e-05	LncRNA	FRMD4A	Positive
Ex	BrainMetalnc.7943	rs17327001	278284	-107231	0.273844	1150	1338	5.39054e-10	0.196301	0.0314962	0.000237178	-0.0993249	0.0269817	5.77306e-09	0.178192	0.030491	1390	8.02455e-06	0.000206175	LncRNA	FRMD4A	Positive
Ex	ENSG00000107614	rs7084913	68826	4358	0.150225	673	734	1.79142e-10	-0.250092	0.0390429	0.00512529	0.0655987	0.0234148	3.02692e-10	-0.241324	0.0381617	706	2.137e-07	9.61652e-06	PCG	TRDMT1	Positive
Ex	BrainMetalnc.8084	rs12217370	-78276	-130495	0.125256	575	612	9.77216e-06	0.190592	0.0430085	0.0395746	-0.0473136	0.0229759	4.81752e-06	0.195199	0.0425932	449	0.00216307	0.0253603	LncRNA	MLLT10	Positive
Ex	BrainMetalnc.8162	rs7911476	41791	-43462	0.208964	903	1021	1.89842e-05	-0.147753	0.0344816	0.0114272	0.0618452	0.0244324	1.05895e-06	-0.165577	0.033841	619	0.000655489	0.00945049	LncRNA	ARHGAP21	Positive
Ex	ENSG00000185875	rs10828727	-77553	-87605	0.258494	1104	1263	4.60432e-19	-0.28959	0.0321923	0.00131297	0.0828605	0.0257582	8.14019e-06	-0.142459	0.0318627	665	0.00541322	0.0496212	PCG	THNSL1	Positive
Ex	BrainMetalnc.8220	rs7923912	-25919	-31131	0.252354	1075	1233	9.41876e-104	0.665323	0.0292936	5.10115e-14	-0.180801	0.0238711	3.58151e-27	0.320285	0.0293092	536	1.91969e-24	9.50246e-22	LncRNA	ABI1	Positive
Ex	ENSG00000283709	rs9334069	4853	-8359	0.476668	1736	2329	2.80113e-66	0.459947	0.0259366	3.47423e-08	-0.177229	0.0320283	4.48323e-14	0.204395	0.0269253	496	2.22368e-11	1.65108e-09	Other	-	Positive
Ex	BrainMetalnc.8228	rs4749199	2589	-8681	0.480761	1746	2349	1.59626e-154	0.678001	0.0237837	1.53701e-10	-0.190242	0.0295898	1.45258e-19	0.225672	0.0247293	500	7.2629e-17	1.07854e-14	LncRNA		Positive
Ex	BrainMetalnc.8275	rs61848475	10179	-984	0.224314	965	1096	5.57651e-126	0.765025	0.0301867	0.00107316	-0.0749605	0.0228919	2.15064e-07	0.156315	0.0300566	780	0.00016775	0.00286332	LncRNA	WAC	Positive
Ex	ENSG00000254635	rs1961727	125765	115351	0.369014	1479	1803	4.2396e-62	0.483132	0.0282296	0.00299068	-0.0827632	0.0278506	6.06123e-06	0.125886	0.0277636	780	0.00472776	0.0454827	LncRNA	WAC-AS1	Positive
Ex	BrainMetalnc.8300	rs4749435	63380	-33523	0.360008	1452	1759	2.21453e-42	-0.394819	0.0283854	8.61329e-15	0.214834	0.0275176	4.14483e-25	-0.301951	0.0288486	900	3.73035e-22	1.10791e-19	LncRNA	SVIL	Positive
Ex	BrainMetalnc.8529	rs2749558	-116438	-123333	0.278551	1178	1361	2.28199e-66	0.530934	0.0299176	1.94037e-07	-0.130681	0.0250347	3.22579e-15	0.236529	0.0298153	224	7.22578e-13	6.70643e-11	LncRNA	ZNF33A	Positive
Ex	BrainMetalnc.8533	rs10870441	760364	732707	0.456611	1739	2231	2.23226e-37	0.365404	0.0281206	4.54543e-05	-0.131676	0.0322323	7.01712e-07	0.140833	0.0283142	205	0.000143851	0.00254308	LncRNA	ZNF37A	Positive
Ex	BrainMetalnc.8534	rs2023299	-39693	-47247	0.499591	1834	2441	2.0037e-51	-0.42114	0.0272645	1.5795e-06	0.165989	0.0344893	8.88765e-08	-0.148466	0.0276762	201	1.78642e-05	0.000390122	LncRNA	ZNF37A	Positive
Ex	ENSG00000272983	rs2749637	115020	107958	0.452722	1723	2212	3.1639e-55	0.441933	0.027524	0.00067411	-0.107559	0.0315951	4.74993e-06	0.130199	0.0283915	208	0.000987984	0.0134648	LncRNA	AL117339.3	Positive
Ex	BrainMetalnc.8559	rs2466466	434875	-30973	0.403807	1577	1973	2.00143e-119	0.638611	0.0259754	2.65466e-09	-0.165995	0.0277865	3.25663e-12	0.182972	0.0261325	343	1.11703e-09	6.91159e-08	LncRNA		Positive
Ex	BrainMetalnc.8571	rs2016696	49083	3816	0.0882112	413	431	7.17503e-39	-0.646842	0.0487344	0.0235432	0.0486493	0.0214699	2.87716e-06	-0.227946	0.0485983	376	0.00108181	0.0143437	LncRNA		Positive
Ex	ENSG00000234420	rs2016696	45182	5870	0.0882112	413	431	9.211e-51	-0.73919	0.0481928	0.0261657	0.0472418	0.0212313	1.50803e-06	-0.231741	0.0480582	376	0.000567018	0.00833685	Other	-	Positive
Ex	BrainMetalnc.8585	rs158384	1417	-5811	0.387638	1526	1894	9.47091e-198	-0.802704	0.0243258	3.36523e-05	0.103235	0.0248462	2.67368e-07	-0.125301	0.0242849	407	0.000108819	0.00199501	LncRNA		Positive
Ex	ENSG00000285884	rs158384	1417	-5811	0.387638	1526	1894	6.3512e-172	-0.756968	0.0249412	0.000587142	0.0876842	0.0254747	4.6837e-06	-0.114258	0.0248992	407	0.00190626	0.0232033	LncRNA	AL022345.4	Positive
Ex	ENSG00000165733	rs3004290	31798	-20344	0.309865	1267	1514	3.81017e-143	0.723136	0.0265181	6.60151e-09	-0.136111	0.0233811	5.43026e-17	0.217686	0.0257968	466	2.5305e-14	2.68414e-12	PCG	BMS1	Positive
Ex	BrainMetalnc.8613	rs72785243	-68010	-70332	0.14122	634	690	1.91302e-147	-0.981223	0.0353716	0.0038565	0.0588429	0.0203437	7.36219e-10	-0.216235	0.0349738	560	4.12283e-07	1.6547e-05	LncRNA		Positive
Ex	ENSG00000230555	rs72785243	-68189	-69551	0.14122	634	690	1.69501e-138	-0.954048	0.0356581	0.00240007	0.0623221	0.0205085	2.77242e-10	-0.223442	0.0352571	562	1.5581e-07	7.23055e-06	LncRNA	AL450326.1	Positive
Ex	BrainMetalnc.8627	rs3128251	6091	5028	0.24826	1055	1213	1.9492e-15	0.258315	0.0323013	0.00276163	-0.0771474	0.0257488	1.93213e-06	0.148348	0.0310874	582	0.0011245	0.0146481	LncRNA		Positive
Ex	ENSG00000012779	rs12358970	-48284	-120227	0.100491	475	491	1.16e-64	0.792689	0.0453069	1.27127e-05	-0.0916566	0.0209549	1.72372e-19	0.401331	0.0440708	325	5.60208e-17	9.24344e-15	PCG	ALOX5	Positive
Ex	BrainMetalnc.8738	rs12262882	354131	21038	0.444945	1675	2174	0.00942907	0.0735018	0.02829	0.000241836	-0.118091	0.032123	8.59472e-06	0.123647	0.0277279	455	0.0039106	0.0402338	LncRNA		Positive
Ex	ENSG00000265018	rs2438988	152192	130432	0.361441	1436	1766	8.41488e-179	-0.773016	0.0248843	0.000112575	0.0945638	0.0244473	6.80389e-06	-0.112955	0.025048	425	0.00289165	0.0320456	Other	-	Positive
Ex	ENSG00000170324	rs769009	27094	-92290	0.384977	1508	1881	6.58713e-145	0.688656	0.0250757	3.03712e-13	-0.189962	0.0259035	7.34872e-22	0.243497	0.0250993	480	3.52738e-19	7.48309e-17	PCG	FRMPD2	Positive
Ex	ENSG00000204152	rs11592062	-353475	-369853	0.269136	1161	1315	2.76567e-32	0.383841	0.0319817	0.000135266	-0.100686	0.0263385	3.39334e-07	0.167076	0.0326681	360	0.00012216	0.00221229	PCG	KNOWN	Positive
Ex	ENSG00000188611	rs13189	574227	477285	0.235366	1016	1150	0	-1.13281	0.0247143	0.000205409	0.0700041	0.0188289	9.17392e-06	-0.113505	0.0255343	289	0.00265126	0.0298267	PCG	ASAH2	Positive
Ex	BrainMetalnc.8882	rs67903669	-93897	-244633	0.153295	694	749	3.16117e-05	-0.165007	0.0395762	0.0264625	0.0517825	0.023318	5.98167e-06	-0.179006	0.0394544	510	0.00305065	0.0333104	LncRNA	FAM13C	Positive
Ex	BrainMetalnc.8881	rs1903253	44550	21351	0.143471	650	701	1.98746e-74	-0.71468	0.0378225	0.00576808	0.0603171	0.0218293	2.13039e-09	-0.234163	0.0389607	495	1.05454e-06	3.3926e-05	LncRNA	PHYHIPL	Positive
Ex	BrainMetalnc.8885	rs6481463	4959	-9531	0.240074	1020	1173	2.03608e-08	-0.184102	0.032714	0.00151171	0.080004	0.02519	3.42566e-08	-0.180715	0.0326435	504	1.72653e-05	0.000382671	LncRNA	FAM13C	Positive
Ex	BrainMetalnc.9007	rs7910951	401530	401166	0.453336	1715	2215	0.0490283	-0.0563884	0.0286333	4.28907e-05	0.137353	0.0335106	5.90169e-07	-0.146047	0.0291643	367	0.000216592	0.0035345	LncRNA	JMJD1C	Positive
Ex	ENSG00000286373	rs10995587	71361	46264	0.445149	1695	2175	4.43706e-53	0.431498	0.027459	1.87192e-05	-0.133757	0.0311923	2.83627e-07	0.141161	0.0274183	327	9.2746e-05	0.00176574	LncRNA	AC022387.2	Positive
Ex	BrainMetalnc.9060	rs74895764	27734	20063	0.104175	488	509	1.35249e-82	0.855989	0.0427791	8.58293e-16	-0.164708	0.020334	2.12111e-36	0.525829	0.0410521	425	9.01473e-34	1.33869e-30	LncRNA	CTNNA3	Positive
Ex	BrainMetalnc.9147	rs7897014	-60435	-71511	0.221858	954	1084	5.19716e-09	-0.197114	0.0336268	0.000251632	0.0900132	0.0245535	7.06898e-08	-0.18256	0.0337696	852	6.02277e-05	0.00116153	LncRNA	SUPV3L1	Positive
Ex	BrainMetalnc.9159	rs10998854	-555	-4186	0.274048	1154	1339	5.50567e-10	0.197436	0.0316954	0.000488777	-0.0928701	0.0265986	4.04064e-06	0.15076	0.0326333	930	0.00375779	0.0392981	LncRNA		Positive
Ex	ENSG00000042286	rs1053105	40019	5308	0.338723	1351	1655	4.79076e-185	-0.786641	0.0248097	8.20651e-08	0.129296	0.0240374	5.80872e-10	-0.151915	0.0244211	1143	6.63937e-07	2.19099e-05	PCG	AIFM2	Positive
Ex	ENSG00000180817	rs10999186	5000	-26076	0.379861	1505	1856	1.47321e-61	0.47351	0.0277996	0.0023058	-0.0870009	0.0285161	3.30873e-06	0.128931	0.0276589	1176	0.00389106	0.0402338	PCG	PPA1	Positive
Ex	BrainMetalnc.9239	rs2394849	-68357	-68803	0.412812	1580	2017	3.04066e-07	-0.144918	0.0282203	1.68919e-06	0.144929	0.0301986	8.51447e-10	-0.175698	0.0285252	609	5.18531e-07	1.87809e-05	LncRNA	SPOCK2	Positive
Ex	BrainMetalnc.9446	rs10824709	215247	-21887	0.311707	1292	1523	8.5232e-146	0.739057	0.026816	1.09674e-08	-0.137763	0.0240222	7.53316e-16	0.218266	0.026892	805	6.0642e-13	6.00355e-11	LncRNA		Positive
Ex	ENSG00000224596	rs10824709	105442	-19125	0.311707	1292	1523	0	1.06194	0.0216846	2.29844e-18	-0.171166	0.0194254	2.34906e-29	0.24785	0.0217461	792	1.86045e-26	1.38139e-23	LncRNA	ZMIZ1-AS1	Positive
Ex	ENSG00000185303	rs941874	-2202	-6757	0.234957	990	1148	5.36496e-88	-0.62595	0.0302064	0.00134452	0.0756971	0.0235815	7.58095e-09	-0.175396	0.0302515	723	5.48103e-06	0.000150728	PCG	SFTPA2	Positive
Ex	ENSG00000244733	rs1713333	-7608	-24713	0.393778	1515	1924	1.61803e-81	-0.524582	0.0264072	0.00481898	0.0789822	0.0279932	2.62683e-06	-0.125465	0.0266427	767	0.00201478	0.0241286	LncRNA	AL132656.2	Positive
Ex	ENSG00000133665	rs35671072	67754	44426	0.143062	647	699	1.67645e-68	-0.686799	0.038037	2.29161e-05	0.0917225	0.0216192	2.44124e-09	-0.232812	0.0388811	646	1.57704e-06	4.87898e-05	PCG	DYDC2	Positive
Ex	BrainMetalnc.9523	rs7900957	6758	4280	0.491404	1793	2401	1.83137e-97	-0.562453	0.0256447	2.92682e-06	0.143536	0.0306251	1.34483e-08	-0.146673	0.0257335	601	8.08242e-06	0.000206175	LncRNA		Positive
Ex	ENSG00000148600	rs7916271	-73	-25157	0.487925	1809	2384	0	-1.06021	0.0191187	9.38508e-06	0.101174	0.0227855	4.55489e-06	-0.0876055	0.0190668	532	0.0024232	0.0274691	PCG	CDHR1	Positive
Ex	ENSG00000204033	rs7916271	-26107	-31080	0.487925	1809	2384	8.81491e-125	-0.644511	0.0255703	0.000129794	0.116808	0.0304744	6.685e-06	-0.115093	0.0255008	525	0.00350963	0.0377666	PCG	LRIT2	Positive
Ex	ENSG00000287475	rs7085743	5474	-282	0.230454	991	1126	9.4783e-263	-1.03218	0.0262246	4.07069e-09	0.117864	0.0199674	1.68604e-15	-0.214059	0.0267061	513	8.64937e-13	7.55548e-11	LncRNA	AL844892.2	Positive
Ex	ENSG00000285257	rs12251946	113879	111842	0.193819	838	947	2.12864e-33	0.417644	0.0341635	0.00475427	-0.0669657	0.0236977	9.29252e-09	0.196352	0.0340698	478	4.44182e-06	0.000124455	Other	-	Positive
Ex	BrainMetalnc.9668	rs551265	43550	26062	0.219607	943	1073	1.12268e-17	0.289554	0.0335667	0.0284874	-0.0548567	0.025028	7.36946e-06	0.148806	0.0331236	499	0.00367736	0.0387297	LncRNA		Positive
Ex	ENSG00000148688	rs17102362	41661	5060	0.207122	899	1012	4.13036e-35	-0.422924	0.0336701	8.7199e-05	0.0957672	0.0243664	6.79222e-09	-0.196155	0.0337233	485	3.29423e-06	9.40755e-05	PCG	RPP30	Positive
Ex	ENSG00000138207	rs11187609	115587	105530	0.220426	957	1077	2.09627e-10	-0.217452	0.0340771	0.00163609	0.0776665	0.0246332	2.94721e-06	-0.166972	0.0356364	499	0.00147066	0.0181994	PCG	RBP4	Positive
Ex	ENSG00000148690	rs1998840	32733	-1976	0.138559	629	677	8.35025e-222	1.20206	0.0339634	0.365743	-0.0169922	0.0187833	1.07839e-06	0.160185	0.0327631	509	0.000548901	0.00815118	PCG	FRA10AC1	Positive
Ex	ENSG00000173145	rs17517368	-3086	-32819	0.173762	780	849	3.44424e-82	0.703852	0.0352716	0.00446546	-0.063689	0.0223791	6.00536e-08	0.188411	0.0346628	456	2.73845e-05	0.000589361	PCG	NOC3L	Positive
Ex	BrainMetalnc.9878	rs4918903	71918	-55265	0.196684	859	961	0.00083982	0.118412	0.0354156	0.014	-0.0606269	0.0246547	9.12881e-07	0.171313	0.0348042	438	0.000399842	0.00605883	LncRNA	ACSM6	Positive
Ex	ENSG00000138185	rs3750701	-78567	-244054	0.331969	1362	1622	2.42439e-09	0.181814	0.0303584	0.000512896	-0.0997793	0.0286839	1.65868e-06	0.142987	0.0297711	585	0.000970326	0.0134648	PCG	ENTPD1	Positive
Ex	ENSG00000119986	rs10444067	5655	-4162	0.215923	941	1055	8.57336e-74	0.609134	0.0323886	0.0149954	-0.057005	0.0234182	6.52385e-06	0.140601	0.0311165	614	0.00400564	0.0407423	PCG	AVPI1	Positive
Ex	ENSG00000107521	rs701801	914	-29823	0.284282	1185	1389	3.81579e-24	0.31556	0.0308015	0.00795753	-0.0709913	0.0267281	4.68842e-06	0.139029	0.0302989	499	0.00233952	0.0269317	PCG	HPS1	Positive
Ex	ENSG00000095485	rs6584351	-21058	-56440	0.49693	1818	2428	6.21405e-265	-0.874603	0.0221039	3.31179e-06	0.126374	0.0271114	8.58157e-10	-0.137215	0.0222818	527	4.52249e-07	1.75511e-05	PCG	CWF19L1	Positive
Ex	ENSG00000055950	rs41291462	4192	-13716	0.189112	831	924	2.77503e-08	0.19842	0.0356021	4.97945e-05	-0.0972886	0.02394	2.51133e-15	0.281939	0.0353975	459	1.1527e-12	9.50977e-11	PCG	MRPL43	Positive
Ex	BrainMetalnc.10083	rs615172	4846	-64125	0.208964	907	1021	2.58898e-29	0.386994	0.0339811	0.0313589	-0.0519359	0.0241144	4.98044e-07	0.169442	0.0336151	459	0.000228602	0.00365026	LncRNA		Positive
Ex	ENSG00000107833	rs58642005	304246	302158	0.203234	890	993	4.70149e-05	0.143568	0.0352112	0.0182858	-0.0580201	0.0245705	4.82934e-06	0.1633	0.0356367	403	0.00194623	0.0234971	PCG	NPM3	Positive
Ex	ENSG00000272933	rs11591780	-177233	-178581	0.497749	1810	2432	4.13324e-11	-0.184869	0.0278859	0.000213743	0.128371	0.034622	3.20239e-06	-0.132344	0.0283498	284	0.00090948	0.0127413	LncRNA	AL391121.1	Positive
Ex	ENSG00000166275	rs4919690	2484	-8218	0.269341	1130	1316	0	-1.08581	0.0230524	7.98629e-09	0.112856	0.0194946	9.06456e-08	-0.125479	0.0234068	353	3.19979e-05	0.000678812	PCG	BORCS7	Positive
Ex	BrainMetalnc.10201	rs1926029	-80840	-88955	0.334834	1353	1636	0.0134194	0.0733213	0.0296338	2.5888e-10	-0.182312	0.0287185	1.92018e-17	0.250535	0.0292589	363	6.97024e-15	7.96215e-13	LncRNA	NT5C2	Positive
Ex	ENSG00000138172	rs7917388	-151580	-157196	0.329513	1330	1610	2.52674e-20	0.274214	0.0294231	0.00434378	-0.0791137	0.0277132	3.52884e-06	0.136069	0.0292743	383	0.00135154	0.0171542	PCG	CALHM2	Positive
Ex	ENSG00000148834	rs1992773	13880	-18223	0.301678	1242	1474	1.58884e-18	0.268268	0.0302989	0.00253098	-0.0818535	0.0270792	1.16124e-05	0.134249	0.030554	465	0.00539978	0.0496212	PCG	GSTO1	Positive
Ex	BrainMetalnc.10353	rs10787291	-8801	-13072	0.125665	568	614	4.62448e-19	-0.37466	0.0416515	0.00278582	0.0669239	0.0223565	1.42958e-08	-0.243954	0.0428807	573	8.19148e-06	0.000206175	LncRNA	BBIP1	Positive
Ex	BrainMetalnc.10484	rs7897496	89260	60874	0.363692	1467	1777	1.03198e-66	0.501308	0.0281684	2.40271e-05	-0.122094	0.0288508	3.0438e-09	0.168175	0.0282587	716	2.17936e-06	6.47271e-05	LncRNA	CASP7	Positive
Ex	ENSG00000234393	rs4315020	75214	74063	0.381907	1515	1866	1.23954e-113	0.630901	0.0263935	7.41924e-08	-0.150756	0.0279319	1.80191e-13	0.194333	0.026245	708	1.27575e-10	8.61134e-09	LncRNA	AL592546.2	Positive
Ex	BrainMetalnc.10542	rs4751936	18460	10183	0.432665	1652	2114	4.64837e-40	-0.369248	0.0273697	1.19869e-10	0.194432	0.0300623	1.06143e-17	-0.235835	0.0273184	408	4.33063e-15	5.35915e-13	LncRNA	ATRNL1	Positive
Ex	BrainMetalnc.10806	rs9422242	3973	1292	0.464593	1737	2270	2.02392e-53	0.427552	0.0271135	2.94741e-05	-0.131812	0.0314934	3.20335e-07	0.13836	0.0269953	984	0.00031521	0.00482564	LncRNA		Positive
Ex	ENSG00000188690	rs11244655	8588	-29690	0.445559	1712	2177	0	-1.0523	0.019892	3.91171e-16	0.180831	0.0220587	6.72044e-21	-0.187777	0.0198407	833	5.59813e-18	1.03915e-15	PCG	UROS	Positive
Ex	BrainMetalnc.10856	rs11245005	13141	278	0.105813	486	517	2.1413e-109	0.971101	0.0415046	0.0100372	-0.052453	0.0203578	2.00737e-07	0.211138	0.0404974	809	0.000162396	0.00280416	LncRNA	C10orf90	Positive
Ex	BrainMetalnc.10859	rs7906913	450	-1231	0.192796	862	942	3.69004e-120	-0.807875	0.0327462	0.00118077	0.0710517	0.0218801	6.28758e-10	-0.207925	0.0334931	888	5.58337e-07	1.97412e-05	LncRNA	C10orf90	Positive
Ex	ENSG00000287466	rs7098548	34776	30100	0.404421	1591	1976	3.6758e-56	-0.450469	0.0278008	6.61942e-08	0.155421	0.0286863	5.72212e-12	-0.18935	0.0273598	970	5.55046e-09	3.05275e-07	LncRNA	AL355531.1	Positive
Ex	BrainMetalnc.10945	rs2280200	1313	-1207	0.386615	1498	1889	8.22866e-160	-0.707491	0.024335	6.85011e-17	0.21215	0.0252245	7.62471e-27	-0.271666	0.0250253	1261	9.61476e-24	3.56948e-21	LncRNA	TCERG1L	Positive
Ex	ENSG00000235010	rs10781561	-26711	-31448	0.314777	1298	1538	1.15938e-13	0.226552	0.0303518	9.01824e-05	-0.108564	0.0276797	1.37921e-08	0.174286	0.0306015	1159	1.5985e-05	0.000359663	LncRNA	AL512622.1	Positive
Ex	ENSG00000148814	rs55813610	18035	-31319	0.138354	623	676	8.69147e-92	0.789984	0.0372413	0.000360029	-0.0761805	0.0213223	1.9138e-15	0.293842	0.0367332	1078	2.06308e-12	1.61246e-10	PCG	LRRC27	Positive
Ex	BrainMetalnc.10989	rs12269628	-31710	-39125	0.115432	528	564	8.82448e-08	0.23664	0.0441025	0.060596	-0.0424571	0.022616	1.93554e-06	0.20228	0.0423925	1082	0.00209425	0.0248797	LncRNA	LRRC27	Positive
Ex	BrainMetalnc.11045	rs3008355	-21834	-43386	0.184609	812	902	2.06682e-44	0.497553	0.0348763	0.000356756	-0.0829305	0.023196	3.41846e-09	0.208092	0.0350798	599	2.04766e-06	6.20566e-05	LncRNA	ZNF511-PRAP1	Positive
Ex	ENSG00000148824	rs11101744	18443	-8128	0.228612	971	1117	7.00259e-170	0.852968	0.0283035	9.08022e-06	-0.0959108	0.0215655	7.60194e-14	0.209758	0.0278901	572	4.34831e-11	3.07487e-09	PCG	MTG1	Positive
Ex	BrainMetalnc.34922	rs4505454	69089	13746	0.4079	1574	1993	0.0131404	-0.0708852	0.0285625	5.87288e-07	0.153242	0.0305953	7.31531e-10	-0.174279	0.0281833	1031	7.54209e-07	3.18883e-05	LncRNA		Positive
Ex	BrainMetalnc.34943	rs1115033	-4689	-6400	0.226566	970	1107	2.8825e-06	-0.156862	0.0334459	0.00431248	0.0723603	0.0253271	4.69695e-07	-0.168233	0.0333005	1093	0.000513376	0.0117124	LncRNA	SHC2	Positive
Ex	ENSG00000099821	rs12610384	16874	558	0.462341	1743	2259	3.56104e-33	-0.339609	0.0278816	8.10779e-06	0.142801	0.0319329	1.17907e-07	-0.147732	0.0278083	1172	0.000138187	0.00392061	PCG	POLRMT	Positive
Ex	ENSG00000099817	rs6843	1657	-7094	0.236594	1018	1156	8.93009e-86	0.628578	0.0307654	8.38954e-08	-0.127236	0.0236721	7.55953e-14	0.228166	0.0303347	1492	1.12788e-10	9.24446e-09	PCG	POLR2E	Positive
Ex	ENSG00000104904	rs2854110	-1148	-4347	0.220016	952	1075	8.43274e-26	-0.355612	0.0334749	4.70659e-05	0.0986924	0.0242066	1.43322e-07	-0.17792	0.0337197	1297	0.000185888	0.00501672	PCG	OAZ1	Positive
Ex	ENSG00000130332	rs12609156	38106	31015	0.386615	1496	1889	1.54978e-95	-0.565441	0.0260693	7.80417e-08	0.144352	0.0267911	1.32201e-11	-0.177398	0.0260925	1340	1.77149e-08	1.00521e-06	PCG	LSM7	Positive
Ex	ENSG00000099800	rs7248779	-22059	-24020	0.46316	1714	2263	8.08721e-172	0.72186	0.023793	1.30224e-06	-0.136537	0.028143	1.31733e-10	0.157325	0.0243797	1387	1.82714e-07	8.6031e-06	PCG	TIMM13	Positive
Ex	ENSG00000060558	rs764262269	13959	-13757	0.261359	1122	1277	2.72437e-207	0.913502	0.0269033	2.78552e-07	-0.11105	0.0215553	1.00901e-18	0.24302	0.0272866	1361	1.37326e-15	2.76275e-13	PCG	GNA15	Positive
Ex	ENSG00000183397	rs8100223	-2336	-7212	0.441261	1689	2156	2.0651e-13	-0.211174	0.0285908	0.000213164	0.119355	0.0321843	4.75562e-07	-0.146259	0.0289647	1300	0.000618231	0.0138196	PCG	C19orf71	Positive
Ex	ENSG00000183617	rs2302307	-1028	-6921	0.362874	1430	1773	2.34678e-122	-0.645739	0.0259065	3.2611e-07	0.135366	0.0264288	5.93937e-12	-0.182389	0.0263745	1277	7.58457e-09	4.41702e-07	PCG	MRPL54	Positive
Ex	ENSG00000105248	rs654692	-1815	-22888	0.302292	1250	1477	1.78136e-133	0.710112	0.0271097	4.87775e-07	-0.122731	0.0243289	1.51577e-15	0.213532	0.0265959	1187	1.79922e-12	1.89604e-10	PCG	YJU2	Positive
Ex	ENSG00000105251	rs11880695	-15278	-26734	0.154932	697	757	1.08306e-30	-0.446404	0.0382306	0.00188598	0.0703755	0.0226213	8.02615e-07	-0.1892	0.0382408	1181	0.000947889	0.0194229	PCG	SHD	Positive
Ex	ENSG00000280239	rs243343	-41666	-43692	0.472165	1759	2307	3.22327e-30	-0.320743	0.027702	2.71653e-05	0.136155	0.0323868	8.3447e-08	-0.15096	0.0280809	1166	9.72992e-05	0.0028332	Other	-	Positive
Ex	ENSG00000176840	rs3760955	3159	-12887	0.332174	1344	1623	8.2697e-268	-0.923049	0.0231676	6.3541e-20	0.197722	0.0214498	8.36959e-21	-0.219891	0.0232926	1175	9.83427e-18	2.72041e-15	LncRNA	MIR7-3HG	Positive
Ex	BrainMetalnc.35381	rs8100888	-10534	-21683	0.374744	1482	1831	3.38132e-125	-0.653424	0.0258748	8.40644e-14	0.193775	0.0258113	3.02789e-18	-0.227583	0.0259221	1168	3.53657e-15	6.02034e-13	LncRNA		Positive
Ex	BrainMetalnc.35447	rs8102642	-38756	-82484	0.349366	1388	1707	2.48282e-306	-0.959931	0.0220746	2.3435e-05	0.0912498	0.0215335	9.94153e-07	-0.109437	0.0223097	1155	0.00114825	0.0227494	LncRNA	LONP1	Positive
Ex	ENSG00000141994	rs10404599	19722	13329	0.185018	836	904	2.22384e-132	-0.863287	0.0331135	0.00250586	0.0651932	0.0215459	4.36898e-08	-0.182404	0.0332085	1126	4.91947e-05	0.00155526	PCG	DUS3L	Positive
Ex	BrainMetalnc.35471	rs2024163	-21150	-55395	0.423864	1615	2071	1.07399e-113	0.608289	0.0254396	1.65024e-09	-0.169652	0.0280318	5.03904e-16	0.207546	0.0254146	1139	5.73946e-13	6.68496e-11	LncRNA	RFX2	Positive
Ex	ENSG00000268297	rs6603123	2239	-833	0.428162	1656	2092	3.43973e-278	0.911664	0.0223285	3.57511e-10	-0.152572	0.0242273	4.85887e-17	0.189469	0.0224174	1060	5.1504e-14	7.59856e-12	Other	-	Positive
Ex	ENSG00000171295	rs2607452	30677	9734	0.401351	1580	1961	3.19435e-26	0.307111	0.0286547	1.55609e-06	-0.146527	0.0304265	1.01192e-09	0.173876	0.0283574	454	4.59412e-07	2.0687e-05	PCG	ZNF440	Positive
Ex	ENSG00000171291	rs2112473	3155	-31834	0.273434	1146	1336	4.03526e-11	-0.208702	0.0314639	0.00107154	0.0869441	0.0265481	2.9166e-07	-0.162512	0.0315978	450	0.000131247	0.00377207	PCG	ZNF439	Positive
Ex	ENSG00000180855	rs7259008	58195	46880	0.240074	1029	1173	8.08849e-13	0.23597	0.0327819	5.31947e-05	-0.102917	0.0254222	3.61302e-10	0.206212	0.0327534	499	1.8029e-07	8.6031e-06	PCG	ZNF443	Positive
Ex	BrainMetalnc.35958	rs73006837	502254	453110	0.170282	755	832	0.0101937	-0.0971962	0.037802	0.00323142	0.0693935	0.0235412	3.32008e-07	-0.193061	0.0377183	584	0.000193893	0.00510816	LncRNA	AC010422.6	Positive
Ex	ENSG00000104979	rs4926171	14710	10393	0.386205	1537	1887	4.25538e-31	-0.338029	0.0287434	2.15789e-07	0.154568	0.0297242	1.11201e-09	-0.184889	0.0302287	841	9.35199e-07	3.7629e-05	PCG	C19orf53	Positive
Ex	ENSG00000105127	rs7245841	62266	35836	0.261564	1106	1278	3.51828e-184	0.861918	0.0272602	0.000315524	-0.080311	0.022263	2.2277e-13	0.198637	0.0269311	872	1.94255e-10	1.48237e-08	PCG	AKAP8	Positive
Ex	ENSG00000099331	rs10854155	-5726	-144481	0.498977	1843	2438	7.09271e-06	-0.128763	0.0286099	2.0244e-06	0.161703	0.0339535	7.76914e-10	-0.178471	0.0289064	983	7.63706e-07	3.18883e-05	PCG	MYO9B	Positive
Ex	ENSG00000099330	rs8107671	3133	127	0.0794106	366	388	2.75294e-35	0.630996	0.050099	0.0312307	-0.0456499	0.0211797	1.64944e-07	0.245122	0.0466871	935	0.000154223	0.00432019	PCG	OCEL1	Positive
Ex	BrainMetalnc.36313	rs2287851	5857	-21230	0.463774	1737	2266	2.15519e-153	-0.700993	0.0246956	1.87691e-05	0.123364	0.0287727	1.6565e-08	-0.139131	0.024566	963	1.59521e-05	0.00053488	LncRNA	UNC13A	Positive
Ex	ENSG00000130475	rs10427063	11318	-29532	0.472984	1753	2311	1.22722e-15	-0.225164	0.0279522	0.000910754	0.112082	0.0337511	2.11318e-06	-0.133319	0.0280452	967	0.00204344	0.0367653	PCG	FCHO1	Positive
Ex	ENSG00000105639	rs2072496	10463	-12787	0.100082	462	489	0.00379903	0.13705	0.0473048	0.0230863	-0.0500326	0.0220074	8.64926e-07	0.239486	0.0485492	970	0.000838978	0.0176825	PCG	JAK3	Positive
Ex	ENSG00000172687	rs11085443	-29948	-50320	0.269341	1135	1316	5.95346e-160	-0.803196	0.0276127	0.00525127	0.0643811	0.0230449	3.44479e-06	-0.127874	0.0274816	446	0.00153638	0.0284978	PCG	ZNF738	Positive
Ex	ENSG00000196268	rs1976384	-8303	-38761	0.387843	1526	1895	3.26968e-33	-0.34276	0.0281232	1.54786e-10	0.190469	0.0296301	1.69506e-16	-0.236145	0.0284496	445	7.54303e-14	9.81924e-12	PCG	ZNF493	Positive
Ex	BrainMetalnc.36618	rs12985126	127923	26839	0.278346	1177	1360	6.58726e-39	0.409534	0.0308392	0.000671791	-0.087834	0.0257939	1.35329e-08	0.170988	0.0300052	365	4.9395e-06	0.000182185	LncRNA	ZNF91	Positive
Ex	ENSG00000268362	rs60068057	4459	-39517	0.194228	858	949	7.74628e-151	0.888302	0.0316018	0.0776303	-0.0383393	0.0217177	9.17649e-06	0.136704	0.0307537	228	0.00209224	0.0373397	LncRNA	AC092279.1	Positive
Ex	ENSG00000261770	rs2159885	47978	44313	0.158616	704	775	0	1.33406	0.0273014	3.35251e-09	-0.100068	0.01686	1.7448e-16	0.229008	0.0276015	358	6.24638e-14	8.63952e-12	LncRNA	AC006504.1	Positive
Ex	ENSG00000287272	rs73528263	5052	-24548	0.145313	665	710	8.47311e-45	0.562648	0.0392541	0.0389917	-0.0475087	0.0230023	2.42785e-07	0.198966	0.0384264	685	0.000166308	0.00454369	LncRNA	AC007786.4	Positive
Ex	ENSG00000105185	rs11084660	22	-6241	0.372084	1466	1818	3.91049e-216	0.830826	0.0238514	0.00192718	-0.0753857	0.0242819	3.22139e-09	0.139776	0.0235241	666	2.14544e-06	8.32959e-05	PCG	PDCD5	Positive
Ex	ENSG00000105186	rs259247	59745	-19096	0.324192	1321	1584	2.22227e-106	-0.63022	0.0273618	4.38151e-07	0.128956	0.0254584	2.49562e-10	-0.172765	0.0271901	706	1.76191e-07	8.6031e-06	PCG	ANKRD27	Positive
Ex	ENSG00000121289	rs2304101	100256	4190	0.474826	1769	2320	1.05193e-23	0.282993	0.0279025	5.27732e-07	-0.163981	0.0326043	6.69884e-09	0.163293	0.0280622	855	5.7275e-06	0.000207786	PCG	CEP89	Positive
Ex	BrainMetalnc.36810	rs74649479	-7014	-9211	0.0536226	252	262	1.2646e-15	-0.497	0.0617271	0.152144	0.0299801	0.0209293	3.67294e-06	-0.299707	0.0645955	788	0.00289428	0.0488934	LncRNA		Positive
Ex	ENSG00000124299	rs16967990	-28298	-163139	0.251535	1079	1229	8.34203e-182	0.872513	0.0278099	2.66844e-08	-0.123484	0.0221291	2.19687e-15	0.221433	0.0277419	800	1.7575e-12	1.89604e-10	PCG	PEPD	Positive
Ex	ENSG00000105220	rs2863315	139578	96645	0.284896	1178	1392	0.00306398	-0.0919276	0.0310125	0.000589603	0.0927974	0.0269692	8.17206e-07	-0.148891	0.0301152	816	0.00066684	0.0147572	PCG	GPI	Positive
Ex	ENSG00000126267	rs61218414	32491	22032	0.49693	1841	2428	1.05965e-134	-0.668899	0.0254029	1.0302e-10	0.208548	0.0321293	4.4644e-12	-0.182945	0.0262984	694	3.0983e-09	1.85312e-07	PCG	COX6B1	Positive
Ex	ENSG00000232677	rs77034043	8832	-63398	0.369832	1462	1807	3.32352e-95	0.576665	0.0266383	2.20496e-08	-0.151264	0.0269457	1.29984e-13	0.197968	0.0265772	545	7.0841e-11	6.20312e-09	LncRNA	LINC00665	Positive
Ex	BrainMetalnc.37005	rs6510587	42720	26508	0.496111	1845	2424	2.77099e-34	0.346213	0.0279213	1.72451e-12	-0.239388	0.0337546	1.18634e-16	0.234107	0.0280571	282	3.34549e-14	5.28826e-12	LncRNA	ZNF420	Positive
Ex	BrainMetalnc.37014	rs320881	-4841	-18986	0.356734	1442	1743	0	1.13281	0.0179675	1.26731e-67	-0.318022	0.0177377	3.95982e-92	0.383815	0.0180565	275	1.08895e-89	2.40985e-86	LncRNA		Positive
Ex	ENSG00000226686	rs320881	-4937	-18587	0.356734	1442	1743	0	1.18808	0.0169168	4.3216e-50	-0.254312	0.0167005	5.61959e-78	0.329563	0.0170006	275	1.54539e-75	1.70997e-72	LncRNA	LINC01535	Positive
Ex	ENSG00000196235	rs8102247	81322	40808	0.402374	1562	1966	2.81008e-38	0.364276	0.0276748	1.3769e-08	-0.168778	0.029633	5.06828e-15	0.221733	0.0281552	576	2.91933e-12	2.93658e-10	PCG	SUPT5H	Positive
Ex	ENSG00000197782	rs337800	16150	-5451	0.0935325	437	457	1.9151e-27	0.528213	0.0480752	0.0783616	-0.0380133	0.0215861	6.68393e-07	0.246349	0.0494333	609	0.000407051	0.0100089	PCG	ZNF780A	Positive
Ex	ENSG00000205041	rs4490099	-47905	-49895	0.306795	1293	1499	2.29878e-11	0.209261	0.0311535	4.63981e-07	-0.139213	0.0275434	2.87108e-13	0.228942	0.0311862	624	1.79156e-10	1.41597e-08	LncRNA	AC118344.1	Positive
Ex	BrainMetalnc.37210	rs4802073	63071	62036	0.319075	1334	1559	1.8421e-10	0.197977	0.0309278	2.07554e-05	-0.118899	0.0278781	7.49035e-10	0.188676	0.0305301	624	4.67398e-07	2.0687e-05	LncRNA	AKT2	Positive
Ex	BrainMetalnc.37217	rs73933218	-69605	-127840	0.143266	648	700	1.12494e-25	0.420263	0.0396659	0.00490879	-0.0631211	0.0224189	1.63253e-06	0.190793	0.0396981	638	0.00104156	0.0211465	LncRNA		Positive
Ex	ENSG00000086544	rs2561554	-54821	-78564	0.181948	820	889	7.99639e-22	-0.357619	0.0368968	0.0336584	0.0508099	0.0239067	2.0556e-06	-0.175631	0.0369022	622	0.00127858	0.0250399	PCG	ITPKC	Positive
Ex	ENSG00000269858	rs35858034	-5037	-14475	0.34343	1395	1678	2.01551e-17	-0.253332	0.0296054	4.16077e-06	0.129813	0.0281365	6.11585e-11	-0.192702	0.0293291	612	3.7429e-08	1.97215e-06	PCG	EGLN2	Positive
Ex	ENSG00000077348	rs2288873	-39300	-50285	0.427343	1599	2088	5.4457e-06	0.126441	0.0277467	0.000986731	-0.100575	0.0304932	7.99641e-07	0.133694	0.0270182	540	0.000431806	0.0103868	PCG	EXOSC5	Positive
Ex	ENSG00000176531	rs10664658	69739	39907	0.363692	1466	1777	6.08849e-31	0.341747	0.0291389	0.000464199	-0.100466	0.0286607	1.66428e-06	0.138474	0.0288354	561	0.000933659	0.0193102	PCG	PHLDB3	Positive
Ex	BrainMetalnc.37425	rs12611428	11807	9418	0.414449	1614	2025	3.68772e-261	0.893716	0.0227947	1.33047e-08	-0.141431	0.0248057	3.39513e-11	0.154138	0.0231473	655	2.22381e-08	1.20032e-06	LncRNA		Positive
Ex	ENSG00000167384	rs62118147	22389	-2783	0.30966	1284	1513	8.16155e-45	-0.426354	0.0297395	0.0011086	0.0890281	0.0272649	1.17197e-06	-0.145055	0.0297695	740	0.000867255	0.018106	PCG	ZNF180	Positive
Ex	ENSG00000268401	rs12611078	1010	-3009	0.230659	1005	1127	1.27362e-05	0.148221	0.0338902	4.60826e-05	-0.105414	0.0258239	2.09414e-10	0.212795	0.0333466	800	1.67531e-07	8.6031e-06	LncRNA	AC007785.3	Positive
Ex	ENSG00000105287	rs12461848	-2639	-45491	0.380679	1476	1860	7.51822e-261	-0.878343	0.0224195	3.46841e-05	0.0999939	0.0241064	2.69015e-08	-0.127533	0.0228605	742	1.99609e-05	0.000659305	PCG	PRKD2	Positive
Ex	ENSG00000134815	rs10853787	2313	-31076	0.0566926	271	277	9.16691e-36	0.762703	0.0601164	0.0635982	-0.0385752	0.0207859	6.6112e-07	0.297298	0.0596314	800	0.000528896	0.0119433	PCG	DHX34	Positive
Ex	BrainMetalnc.37676	rs10425251	-23809	-96252	0.227794	987	1113	1.65924e-30	-0.386516	0.0332108	0.0208372	0.0583801	0.0252463	1.69677e-06	-0.159065	0.0331503	827	0.00140323	0.027003	LncRNA	CRX	Positive
Ex	ENSG00000268583	rs3745715	-9055	-10840	0.349161	1427	1706	8.35457e-93	-0.595413	0.0278976	0.00122532	0.0858658	0.0265287	6.65211e-08	-0.148862	0.0274801	870	5.78734e-05	0.0017788	LncRNA	AC011466.1	Positive
Ex	ENSG00000232871	rs571689	66152	22052	0.484241	1789	2366	1.47171e-51	-0.41938	0.0271122	0.000131233	0.119487	0.0311956	8.60236e-08	-0.139939	0.0260577	860	7.39803e-05	0.00224272	Other	-	Positive
Ex	ENSG00000104863	rs1060967	4011	-66	0.383545	1521	1874	1.23457e-53	0.444057	0.028099	0.00163147	-0.091257	0.028936	7.3924e-08	0.14771	0.0273643	767	5.66997e-05	0.00176728	PCG	LIN7B	Positive
Ex	ENSG00000039650	rs1290646	36	-7991	0.473803	1759	2315	1.25909e-64	-0.467207	0.0267117	1.92469e-08	0.179707	0.0318774	1.84155e-10	-0.172222	0.0269042	934	1.72001e-07	8.6031e-06	PCG	PNKP	Positive
Ex	ENSG00000086967	rs55888870	-346	-33775	0.424887	1633	2076	6.85482e-81	-0.525184	0.0265502	3.40031e-11	0.191684	0.0287868	1.16681e-16	-0.221128	0.0264952	1130	1.3185e-13	1.62102e-11	PCG	MYBPC2	Positive
Ex	ENSG00000167754	rs7259003	7537	-2253	0.335858	1370	1641	4.80678e-65	0.500554	0.0285177	0.00117536	-0.0860259	0.0264807	7.56962e-08	0.155518	0.0288336	1263	9.56043e-05	0.00282097	PCG	KLK5	Positive
Ex	ENSG00000129451	rs3745535	4492	-2944	0.368809	1478	1802	1.92301e-130	0.678514	0.0262465	9.81502e-08	-0.144487	0.0270259	1.82453e-13	0.199423	0.0269384	1246	2.27336e-10	1.67698e-08	PCG	KLK10	Positive
Ex	ENSG00000105509	rs8113161	5847	-5032	0.332992	1348	1627	8.33078e-98	0.600349	0.0273191	1.99852e-06	-0.122771	0.0257646	1.1262e-12	0.199893	0.0279495	1281	1.44266e-09	9.39002e-08	PCG	HAS1	Positive
Ex	ENSG00000269235	rs11879758	37777	5544	0.136922	621	669	2.24166e-88	0.791743	0.0381163	0.0199763	-0.0494541	0.0212402	3.21379e-07	0.197223	0.0384848	1286	0.000413293	0.0100507	LncRNA	ZNF350-AS1	Positive
Ex	ENSG00000221923	rs62108318	10405	-5473	0.378837	1494	1851	2.84992e-243	0.865791	0.0230961	2.78906e-11	-0.159591	0.0238611	5.27239e-21	0.220773	0.0232626	1347	7.10191e-18	2.31347e-15	PCG	ZNF880	Positive
Ex	BrainMetalnc.38032	rs7249746	102096	3596	0.399304	1554	1951	7.92291e-23	0.280134	0.0281973	7.46416e-07	-0.147471	0.029721	3.44155e-13	0.204274	0.0279204	1542	5.30687e-10	3.67003e-08	LncRNA	ZNF611	Positive
Ex	ENSG00000196417	rs76785119	32532	-8088	0.128735	577	629	4.26881e-15	-0.325948	0.041273	0.050429	0.0437431	0.022349	2.55941e-09	-0.241497	0.0403842	1452	3.71626e-06	0.000139391	PCG	ZNF765	Positive
Ex	ENSG00000142409	rs57364584	-1611	-35543	0.116455	537	569	4.65588e-27	0.473813	0.043458	0.0461666	-0.0444984	0.0223063	5.14854e-07	0.213861	0.0424815	1386	0.000713587	0.015482	PCG	ZNF787	Positive
Ex	ENSG00000267454	rs7258010	887	-4629	0.487515	1787	2382	5.1109e-160	-0.708037	0.0243354	1.10167e-09	0.181516	0.0296699	3.61148e-08	-0.132702	0.0240114	1311	4.73465e-05	0.00151852	LncRNA	ZNF582-AS1	Positive
Ex	BrainMetalnc.38338	rs76289041	15299	-210	0.19607	852	958	3.62679e-111	0.753466	0.0319132	0.00502989	-0.0613029	0.0218341	3.58153e-07	0.158221	0.0309992	815	0.000291894	0.00734048	LncRNA	ZNF460	Positive
Ex	ENSG00000178229	rs8109488	11314	1016	0.471551	1757	2304	0.00052118	-0.0979373	0.0281893	8.90369e-09	0.18576	0.0321911	1.36809e-14	-0.21512	0.0277677	796	1.089e-11	1.04781e-09	PCG	ZNF543	Positive
Ex	ENSG00000131845	rs8100796	36105	27567	0.466639	1735	2280	3.45012e-64	-0.464928	0.0266802	2.32653e-06	0.148222	0.0313096	5.88648e-07	-0.134535	0.0268628	803	0.000472684	0.0111282	PCG	ZNF304	Positive
Ex	ENSG00000186272	rs10413680	24011	13238	0.261154	1113	1276	2.86212e-46	-0.45559	0.0312333	0.00268242	0.0760175	0.0252966	1.77387e-06	-0.151215	0.0315734	787	0.00139604	0.027003	PCG	ZNF17	Positive
Ex	ENSG00000186230	rs3746224	2843	-8933	0.474826	1757	2320	6.65499e-25	-0.281304	0.0269971	2.08831e-23	0.32402	0.0321697	1.28656e-33	-0.33153	0.0270235	798	1.02667e-30	7.57342e-28	PCG	ZNF749	Positive
Ex	ENSG00000105136	rs7253260	2017	-6370	0.304748	1271	1489	2.41478e-152	0.764611	0.0270447	1.88388e-05	-0.100756	0.0235044	5.83393e-13	0.196511	0.0271291	792	4.62047e-10	3.29842e-08	PCG	ZNF419	Positive
Ex	ENSG00000204514	rs6510098	-58824	-99167	0.422227	1636	2063	1.9778e-97	-0.581204	0.0265047	2.00373e-06	0.137186	0.028793	3.06308e-12	-0.18322	0.0261353	650	1.991e-09	1.25888e-07	PCG	ZNF814	Positive
Ex	BrainMetalnc.38364	rs67825948	78173	7793	0.244372	1050	1194	1.29837e-14	0.254085	0.0327686	0.00066193	-0.0860243	0.0252324	2.55372e-08	0.180858	0.0323661	590	1.50669e-05	0.000512971	LncRNA	ZNF606	Positive
Ex	ENSG00000176593	rs4801540	1286	-7885	0.461318	1730	2254	3.48654e-111	-0.602532	0.0255181	1.02377e-09	0.184971	0.0301761	4.09002e-18	-0.220101	0.0251701	534	2.18407e-15	4.02779e-13	LncRNA	AC008969.1	Positive
Ex	BrainMetalnc.47066	rs9808748	-14759	-28764	0.246623	1072	1205	0.0393389	0.0692239	0.0335756	0.0012753	-0.0857957	0.0266013	1.11827e-07	0.169943	0.0319305	634	7.0898e-05	0.00123885	LncRNA	APP	Positive
Ex	BrainMetalnc.47070	rs2830132	62144	-706029	0.259517	1115	1268	3.07561e-284	1.04335	0.0252	1.05949e-06	-0.100796	0.0206014	2.27435e-10	0.165402	0.0259721	1013	2.30392e-07	6.95364e-06	LncRNA	ADAMTS5	Positive
Ex	ENSG00000273492	rs2830132	62065	15554	0.259517	1115	1268	2.07529e-286	1.04759	0.0251775	3.60367e-06	-0.0955814	0.020583	1.26279e-08	0.148183	0.0259489	723	9.12995e-06	0.00019551	LncRNA	APP-DT	Positive
Ex	BrainMetalnc.47109	rs60584984	33972	31997	0.185223	816	905	7.43491e-166	-0.928301	0.0312418	0.000358792	0.0751776	0.0210363	2.03821e-08	-0.172551	0.0306624	475	9.6815e-06	0.00019551	LncRNA	N6AMT1	Positive
Ex	ENSG00000156239	rs9981721	-22829	-36009	0.193205	853	944	7.31992e-251	-1.09445	0.0286364	0.0044039	0.0559478	0.0196284	3.71754e-06	-0.129851	0.0280019	482	0.00179186	0.016997	PCG	N6AMT1	Positive
Ex	ENSG00000156253	rs4817271	115234	100258	0.275686	1162	1347	0	1.07683	0.0234496	0.0128181	-0.0490536	0.0196953	4.81307e-07	0.119423	0.023661	453	0.000218032	0.00301611	PCG	RWDD2B	Positive
Ex	ENSG00000177692	rs13048414	1506	-4680	0.240074	1023	1173	2.97934e-82	0.611599	0.0306356	0.000307639	-0.0853599	0.0236194	6.65466e-07	0.152965	0.0306893	669	0.000445197	0.00509674	PCG	DNAJC28	Positive
Ex	BrainMetalnc.47427	rs2242801	40148	-25712	0.483422	1789	2362	4.32804e-106	-0.593857	0.0258225	0.000879053	0.102341	0.0307262	2.09034e-06	-0.121656	0.0255798	716	0.00149668	0.0146147	LncRNA	CBR3	Positive
Ex	ENSG00000185808	rs2835633	89873	79549	0.490585	1790	2397	8.25749e-47	0.39246	0.0267368	5.64149e-12	-0.218341	0.0315395	3.17294e-16	0.215744	0.0262348	724	2.29721e-13	2.54225e-11	PCG	PIGP	Positive
Ex	BrainMetalnc.47486	rs1235345	-55579	-61213	0.497544	1810	2431	8.04407e-35	-0.340878	0.0272602	5.34128e-06	0.148732	0.0326091	4.87221e-08	-0.147022	0.0268624	698	3.4008e-05	0.000627259	LncRNA	TTC3	Positive
Ex	BrainMetalnc.47538	rs8131126	121585	112714	0.343635	1364	1679	2.57536e-16	0.23759	0.0288014	7.19633e-06	-0.125176	0.0278321	1.42823e-10	0.183333	0.028465	973	1.38967e-07	4.68104e-06	LncRNA		Positive
Ex	BrainMetalnc.47541	rs6517522	-24424	-49020	0.475235	1736	2322	1.41009e-21	-0.262315	0.0272335	0.000151007	0.122562	0.0322925	3.45717e-07	-0.133955	0.0262103	984	0.000340185	0.00438861	LncRNA	BRWD1	Positive
Ex	ENSG00000157601	rs457274	538	-49513	0.429185	1660	2097	4.58355e-19	0.257625	0.0286373	0.000237507	-0.117814	0.0320075	4.38455e-09	0.172216	0.0292368	1395	6.11645e-06	0.000156205	PCG	MX1	Positive
Ex	BrainMetalnc.47612	rs62216681	4082	1716	0.198526	867	970	0	1.17492	0.0262402	5.48753e-05	-0.0733333	0.0181474	3.08014e-09	0.157315	0.0264426	1383	4.25983e-06	0.000117855	LncRNA	C2CD2	Positive
Ex	ENSG00000237232	rs220219	15111	-30825	0.3772	1489	1843	7.57261e-19	0.257091	0.0287607	0.000299758	-0.107457	0.0296782	6.7496e-07	0.145555	0.0292188	1386	0.000935495	0.00941165	LncRNA	ZNF295-AS1	Positive
Ex	ENSG00000160188	rs4919990	46077	25484	0.400327	1562	1956	1.02637e-84	0.544682	0.026843	0.00102174	-0.0935019	0.0284335	3.72491e-07	0.135962	0.0266774	1424	0.000530427	0.00587006	PCG	RSPH1	Positive
Ex	BrainMetalnc.47650	rs62215005	-8280	-9745	0.377405	1502	1844	1.60788e-48	-0.423025	0.0282638	1.3644e-05	0.1265	0.0290244	3.32358e-07	-0.148562	0.0290256	1202	0.000399495	0.0049123	LncRNA	WDR4	Positive
Ex	ENSG00000160194	rs9808702	-14976	-48636	0.406877	1591	1988	1.09931e-47	-0.414226	0.0279376	2.869e-05	0.126664	0.0302188	1.03872e-07	-0.148825	0.0278917	1193	0.000123919	0.0019591	PCG	NDUFV3	Positive
Ex	ENSG00000141959	rs2847227	-1542	-28867	0.17806	787	870	1.67048e-88	-0.707615	0.034039	0.0078513	0.0585459	0.0220048	2.07367e-07	-0.180297	0.0346224	1006	0.000208611	0.00301611	PCG	PFKL	Positive
Ex	ENSG00000160226	rs11870	9930	-213	0.216537	953	1058	5.76341e-79	0.635377	0.0325497	0.000190457	-0.0876455	0.023453	1.00211e-08	0.183988	0.0319962	999	1.0011e-05	0.00019551	PCG	CFAP410	Positive
Ex	ENSG00000142185	rs41277556	84879	-8039	0.234548	1026	1146	9.33285e-25	-0.346212	0.033334	9.65154e-06	0.111058	0.0250459	1.34795e-10	-0.219377	0.0340142	1046	1.40995e-07	4.68104e-06	PCG	TRPM2	Positive
Ex	ENSG00000276529	rs55959820	13844	13402	0.108883	505	532	7.17895e-93	0.902751	0.042281	0.11027	-0.0327152	0.0204782	9.10393e-07	0.214088	0.0434896	983	0.000894916	0.00928476	LncRNA	ENSG00000276529	Positive
Ex	ENSG00000223768	rs2838864	3509	-6247	0.282849	1190	1382	0	-1.27729	0.0180165	2.57323e-24	0.157253	0.0152901	1.55511e-36	-0.226734	0.017666	1091	1.69662e-33	2.81639e-31	LncRNA	LINC00205	Positive
Ex	BrainMetalnc.47788	rs1304487	-57410	-62626	0.298199	1233	1457	0	-1.14933	0.0204452	5.71318e-09	0.105068	0.0179731	7.80223e-14	-0.150211	0.0199818	1077	8.40301e-11	4.64966e-09	LncRNA		Positive
Ex	ENSG00000173638	rs3788205	50888	-28901	0.305772	1254	1494	6.2543e-31	-0.349282	0.0297875	0.000994896	0.087951	0.0266844	3.13869e-07	-0.149526	0.0291519	1095	0.000343686	0.00438861	PCG	SLC19A1	Positive
Ex	BrainMetalnc.47796	rs2838951	8195	2200	0.437577	1663	2138	4.57428e-75	0.50316	0.026504	2.0051e-09	-0.179109	0.0297514	1.07788e-14	0.208549	0.0268124	1054	1.13608e-11	9.42947e-10	LncRNA	COL18A1	Positive
Ex	ENSG00000142156	rs4818812	18735	-4546	0.276095	1163	1349	1.22627e-66	0.533254	0.0299819	0.000293652	-0.0902067	0.0248772	2.60783e-07	0.156032	0.0302132	827	0.000215668	0.00301611	PCG	COL6A1	Positive
Ex	BrainMetalnc.47817	rs2300410	495206	491780	0.247237	1061	1208	5.45595e-27	-0.352587	0.0323842	0.00485844	0.071376	0.0253209	4.00184e-06	-0.147191	0.0318468	738	0.00295335	0.0265004	LncRNA	FTCD	Positive
Ex	ENSG00000160284	rs2839188	111736	88408	0.358371	1422	1751	1.23971e-75	-0.520498	0.0273042	1.9176e-06	0.130005	0.0272348	1.01492e-08	-0.15787	0.0274645	742	7.5307e-06	0.000178585	PCG	SPATC1L	Positive
Ex	ENSG00000182362	rs2254522	-91813	-103222	0.199345	868	974	4.57e-131	0.807063	0.031134	5.02623e-06	-0.0994976	0.0217532	4.78291e-12	0.214233	0.03084	692	3.30977e-09	1.37356e-07	PCG	YBEY	Positive
Ex	BrainMetalnc.47836	rs2839195	-11940	-15063	0.0970119	448	474	2.04187e-06	-0.226781	0.0476359	0.0773543	0.0391757	0.0221708	2.80082e-06	-0.227837	0.0485178	690	0.00193257	0.0178226	LncRNA	YBEY	Positive
Ex	ENSG00000160310	rs4819274	34020	4491	0.413221	1611	2019	4.63227e-16	-0.235045	0.0287453	5.8873e-05	0.125436	0.0311694	1.99918e-07	-0.147219	0.0282331	472	9.43613e-05	0.0015664	PCG	PRMT2	Positive
Ex	ENSG00000282375	rs11782723	-84006	-85832	0.340974	1367	1666	3.74482e-07	-0.150328	0.0295021	0.000379514	0.101312	0.0284673	1.92298e-06	-0.144829	0.0303439	1204	0.00231527	0.0259347	LncRNA	AC100797.4	Positive
Ex	BrainMetalnc.72063	rs55653235	-7772	-241249	0.354073	1427	1730	0.00615167	-0.0818169	0.0298387	0.000299559	0.105918	0.0292518	1.86959e-06	-0.143593	0.0300488	1982	0.00370554	0.037297	LncRNA	DLGAP2	Positive
Ex	ENSG00000275427	rs7016848	-9138	-15610	0.3772	1490	1843	1.28614e-05	-0.126494	0.0289366	1.95591e-08	0.169212	0.0300306	2.42809e-14	-0.22841	0.0297714	1775	4.30985e-11	3.5214e-09	LncRNA	AF067845.2	Positive
Ex	BrainMetalnc.72123	rs7827977	9335	-2079	0.302702	1275	1479	6.60292e-07	-0.156866	0.0314624	0.000170234	0.104601	0.0277798	1.27978e-06	-0.151685	0.0312428	2327	0.00297805	0.0313372	LncRNA	CSMD1	Positive
Ex	BrainMetalnc.72125	rs11136585	21635	-1247	0.179902	798	879	1.21952e-44	-0.506665	0.0354161	4.08707e-06	0.107079	0.0231901	3.20294e-13	-0.255533	0.0348795	2345	7.5109e-10	4.96793e-08	LncRNA	CSMD1	Positive
Ex	ENSG00000286934	rs1847570	10840	-799	0.36799	1439	1798	2.43046e-37	-0.359213	0.027659	5.94375e-10	0.171461	0.0275796	1.04333e-15	-0.228373	0.0282791	2575	2.68658e-12	3.10972e-10	LncRNA	AC027251.1	Positive
Ex	BrainMetalnc.72144	rs117374012	677	-679115	0.158616	708	775	0.0474381	0.0766266	0.0386346	0.00719694	-0.0630624	0.0234445	6.88428e-07	0.190298	0.0382302	3248	0.00223601	0.0254576	LncRNA		Positive
Ex	BrainMetalnc.72205	rs2980436	631865	-10362	0.441261	1696	2156	2.7319e-12	-0.201756	0.0287125	1.78965e-07	0.166023	0.0317134	1.63263e-10	-0.181412	0.0282575	1162	1.89711e-07	6.42704e-06	LncRNA		Positive
Ex	ENSG00000253893	rs1404926745	435548	376753	0.207941	903	1016	1.00531e-26	0.36915	0.0340886	0.00671128	-0.065424	0.0241136	3.64539e-06	0.14998	0.0323141	646	0.00235492	0.0261679	LncRNA	FAM85B	Positive
Ex	ENSG00000173295	rs2945230	23819	7549	0.484855	1814	2369	9.91256e-268	0.893864	0.0224393	1.76316e-12	-0.187773	0.0264884	1.32838e-25	0.231764	0.0219083	662	8.79388e-23	4.07157e-20	Other	-	Positive
Ex	ENSG00000285675	rs670044	-82986	-112404	0.325829	1340	1592	0.00129075	0.0980325	0.0304281	5.19474e-06	-0.130566	0.0285893	6.90543e-11	0.196883	0.0300496	1269	8.76299e-08	3.2031e-06	LncRNA	AC023385.1	Positive
Ex	ENSG00000261451	rs11250016	26116	21476	0.469505	1761	2294	2.75529e-31	0.325656	0.0276004	5.09203e-10	-0.198938	0.031873	4.35195e-18	0.242627	0.0277691	1135	4.93946e-15	8.57614e-13	LncRNA	AC104964.2	Positive
Ex	ENSG00000253649	rs62492775	25042	-38317	0.338928	1379	1656	1.47104e-09	0.181769	0.0299411	0.000458254	-0.0995186	0.0283624	7.47574e-08	0.161059	0.0298484	1190	8.89613e-05	0.00174038	PCG	PRSS51	Positive
Ex	BrainMetalnc.72306	rs2409665	-223837	-229047	0.442079	1684	2160	2.88412e-17	-0.240774	0.0282788	2.88738e-05	0.132887	0.0317143	3.44183e-08	-0.154264	0.0278698	1282	4.41243e-05	0.000905575	LncRNA	XKR6	Positive
Ex	ENSG00000269918	rs2409784	434655	432642	0.458453	1749	2240	1.86509e-46	0.40824	0.0279264	1.73269e-07	-0.165253	0.0315299	1.25495e-09	0.166784	0.0273563	1285	1.61261e-06	4.57125e-05	LncRNA	AF131215.6	Positive
Ex	ENSG00000255310	rs1057625	-2341	-4279	0.450471	1699	2201	5.04763e-69	-0.481493	0.0265561	5.22314e-10	0.189053	0.0303089	1.41417e-14	-0.20535	0.0265214	1285	1.81721e-11	1.68274e-09	LncRNA	AF131215.5	Positive
Ex	BrainMetalnc.72333	rs10098874	33373	19414	0.158002	714	772	1.17625e-25	0.406689	0.0384005	0.0217338	-0.052733	0.0229627	1.81454e-06	0.18431	0.0385207	912	0.00165486	0.0198545	LncRNA	NEIL2	Positive
Ex	ENSG00000254507	rs6601649	-3592	-4274	0.449447	1719	2196	1.82264e-185	-0.776644	0.0244612	2.90307e-05	0.116435	0.0277964	4.12587e-08	-0.136195	0.0247496	946	3.90307e-05	0.000821418	Other	-	Positive
Ex	ENSG00000284610	rs35851103	5863	-3142	0.484241	1800	2366	9.48283e-295	0.923696	0.0217875	1.68906e-08	-0.150763	0.0266357	3.32738e-10	0.139311	0.0220819	962	3.20094e-07	1.03398e-05	Other	-	Positive
Ex	ENSG00000227888	rs34421088	-630486	-656763	0.495702	1820	2422	2.26586e-74	-0.502777	0.0266193	0.000213692	0.118765	0.0320309	2.06883e-06	-0.125226	0.0263187	1031	0.00213296	0.0245758	LncRNA	FAM66A	Positive
Ex	ENSG00000104723	rs352808	345519	-3915	0.326443	1333	1595	1.66908e-25	0.312111	0.0295661	2.11728e-05	-0.116314	0.0273006	1.54928e-12	0.212959	0.0299642	1220	1.89012e-09	1.05015e-07	PCG	TUSC3	Positive
Ex	BrainMetalnc.72406	rs13262408	-31969	-34775	0.285919	1198	1397	2.97642e-10	-0.197915	0.0312842	1.23777e-05	0.117397	0.0268038	2.9688e-07	-0.163996	0.0319072	1041	0.000309052	0.0048781	LncRNA	TUSC3	Positive
Ex	ENSG00000120910	rs2249102	101861	1836	0.463774	1735	2266	1.78511e-75	-0.503284	0.0264316	9.47865e-08	0.165014	0.0308287	3.74572e-12	-0.185033	0.0265026	986	3.69328e-09	1.76895e-07	PCG	PPP3CC	Positive
Ex	ENSG00000120913	rs56036787	9246	-10500	0.101105	472	494	2.17043e-86	-0.896969	0.0437287	2.30249e-05	0.0870733	0.0205286	1.65549e-12	-0.3146	0.0443238	975	1.6141e-09	9.34162e-08	PCG	PDLIM2	Positive
Ex	BrainMetalnc.72630	rs937969	2755	-9304	0.360213	1442	1760	0	-0.980772	0.0219048	1.92456e-08	0.123464	0.0219006	3.38053e-14	-0.166307	0.0218006	953	3.22164e-11	2.79679e-09	LncRNA	PEBP4	Positive
Ex	ENSG00000248738	rs937969	2621	-7429	0.360213	1442	1760	2.05303e-295	-0.95441	0.0224787	1.0852e-05	0.0990824	0.0224745	3.06531e-09	-0.133114	0.0223718	954	2.9243e-06	7.52195e-05	LncRNA	AC037441.1	Positive
Ex	BrainMetalnc.72685	rs10503767	4909	-9607	0.352231	1406	1721	0	-1.00462	0.0215175	5.73339e-09	0.123589	0.0211434	2.17126e-15	-0.169878	0.0212789	584	1.26802e-12	1.60116e-10	LncRNA		Positive
Ex	ENSG00000120915	rs28722859	-5945	-60728	0.0730659	340	357	7.11472e-51	0.794663	0.0517475	0.0281667	-0.0454834	0.0207094	2.04691e-12	0.358481	0.0507206	724	1.48196e-09	9.34162e-08	PCG	EPHX2	Positive
Ex	ENSG00000147419	rs11778882	114841	75750	0.306386	1270	1497	2.50221e-66	0.517621	0.0291771	0.000230079	-0.0938153	0.0254312	3.80197e-07	0.152457	0.029937	698	0.000265377	0.00429674	PCG	CCDC25	Positive
Ex	ENSG00000104290	rs960914	9255	-70807	0.406877	1574	1988	3.76944e-59	0.451886	0.0271128	1.09453e-08	-0.166462	0.0290247	8.01547e-15	0.209252	0.0267707	665	5.33029e-12	5.69521e-10	PCG	FZD3	Positive
Ex	ENSG00000147421	rs10088428	161611	-12758	0.262178	1099	1281	3.86314e-31	-0.364987	0.031013	0.000431305	0.088607	0.0251368	3.84361e-12	-0.219993	0.0315268	710	2.72896e-09	1.35376e-07	PCG	HMBOX1	Positive
Ex	ENSG00000133872	rs4383929	-21715	-41136	0.109087	505	533	8.01535e-06	-0.204065	0.0456074	0.00476293	0.063346	0.0224214	1.30161e-06	-0.220436	0.0454353	568	0.000739317	0.0102691	PCG	SARAF	Positive
Ex	BrainMetalnc.72908	rs7001724	39534	17715	0.304748	1269	1489	1.55796e-31	-0.356232	0.0300629	5.70146e-10	0.166947	0.0268248	2.69544e-16	-0.25892	0.0314085	467	1.25877e-13	1.9427e-11	LncRNA	NRG1	Positive
Ex	ENSG00000147471	rs7463174	15531	-1637	0.147564	663	721	4.44658e-08	0.215882	0.0393261	0.00023881	-0.0832824	0.0226345	1.41338e-14	0.315344	0.0407269	468	6.61462e-12	6.56265e-10	PCG	PLPBP	Positive
Ex	ENSG00000272479	rs7818646	1873	1280	0.339542	1384	1659	5.09423e-36	-0.373197	0.0293024	4.36301e-05	0.112261	0.0274155	8.44473e-07	-0.143799	0.0291233	608	0.00051344	0.00753083	LncRNA	AC010857.1	Positive
Ex	BrainMetalnc.73146	rs62510967	158119	48702	0.489562	1802	2392	3.07277e-54	0.424084	0.0266724	3.64311e-17	-0.275812	0.0325005	1.38448e-23	0.266364	0.0263356	381	5.27487e-21	1.25401e-18	LncRNA	SLC20A2	Positive
Ex	BrainMetalnc.73234	rs77610594	-428616	-433353	0.0992632	460	485	5.91048e-26	-0.495984	0.0465368	0.0853439	0.0372784	0.0216586	1.5467e-06	-0.231646	0.0480894	172	0.000266033	0.00429674	LncRNA	SPIDR	Positive
Ex	ENSG00000104738	rs62539154	-194815	-212790	0.0994679	455	486	8.85339e-94	-0.925236	0.0431002	0.0195224	0.0475084	0.0203293	7.18513e-06	-0.201903	0.0448886	216	0.00155199	0.0190771	PCG	MCM4	Positive
Ex	ENSG00000034239	rs4873289	74168	49646	0.364102	1454	1779	0	1.07643	0.0200094	0.00279446	-0.0592795	0.0198091	4.71394e-09	0.115556	0.0196583	273	1.28691e-06	3.80322e-05	PCG	EFCAB1	Positive
Ex	ENSG00000047249	rs56818292	-4453	-132468	0.0575113	275	281	2.05412e-30	-0.698625	0.0601278	0.019145	0.0491192	0.020953	9.45734e-07	-0.284986	0.0579803	427	0.000403828	0.00623242	PCG	ATP6V1H	Positive
Ex	BrainMetalnc.73340	rs6991513	30588	-36530	0.223086	964	1090	1.39002e-101	0.694722	0.0309517	0.000572158	-0.0782496	0.0226874	6.02083e-09	0.180461	0.0309168	412	2.48058e-06	6.62602e-05	LncRNA	ATP6V1H	Positive
Ex	BrainMetalnc.73461	rs1379887753	75888	27313	0.287966	1202	1407	2.60459e-36	-0.388017	0.0303333	3.37221e-07	0.13612	0.0266092	3.95652e-11	-0.197034	0.0296916	561	2.21961e-08	9.34254e-07	LncRNA	UBXN2B	Positive
Ex	ENSG00000104442	rs7464223	7197	-24562	0.39255	1540	1918	1.0691e-61	0.464967	0.0272645	1.02255e-10	-0.18575	0.028612	2.07495e-18	0.24024	0.0272281	375	7.78108e-16	1.54399e-13	PCG	ARMC1	Positive
Ex	ENSG00000147576	rs55878528	20854	-15561	0.30352	1264	1483	3.2712e-105	0.649067	0.0283551	0.000173126	-0.0936198	0.0248914	2.03055e-06	0.132279	0.0277788	276	0.000560433	0.00810876	PCG	ADHFE1	Positive
Ex	ENSG00000221947	rs6472551	200275	79243	0.494474	1805	2416	4.58612e-78	-0.491152	0.0253205	8.53149e-37	0.404755	0.0314152	5.64203e-51	-0.39039	0.0253944	596	3.36265e-48	4.67072e-45	PCG	XKR9	Positive
Ex	BrainMetalnc.73802	rs10092584	31461	29168	0.396848	1562	1939	4.32565e-42	-0.391029	0.028218	4.79877e-05	0.121832	0.0299157	8.89063e-07	-0.139596	0.0283305	469	0.000416971	0.00636453	LncRNA	GDAP1	Positive
Ex	ENSG00000253596	rs7842662	19655	17362	0.42018	1628	2053	1.54277e-45	-0.402725	0.0278486	7.4245e-05	0.121072	0.0305039	5.33989e-07	-0.138963	0.0276426	469	0.000250441	0.00414121	LncRNA	AC103952.1	Positive
Ex	BrainMetalnc.73863	rs2086755	-22328	-36538	0.207122	894	1012	5.27257e-250	-1.04795	0.0274791	0.00294061	0.0591923	0.019884	2.12885e-08	-0.146533	0.0260742	392	8.34511e-06	0.000196464	LncRNA	IL7	Positive
Ex	BrainMetalnc.73923	rs16907894	-20425	-21277	0.0724519	345	354	0.0300763	-0.121453	0.0559602	0.288321	0.0227724	0.021442	2.12289e-07	-0.305681	0.0587495	541	0.000114849	0.00221562	LncRNA	ZNF704	Positive
Ex	ENSG00000185015	rs6987641	31460	-32026	0.289808	1204	1416	3.29909e-33	0.369584	0.030326	0.00516757	-0.0746165	0.026659	1.34809e-05	0.135702	0.0311168	209	0.00281752	0.0301041	PCG	CA13	Positive
Ex	BrainMetalnc.74189	rs2976363	27333	-13765	0.409537	1565	2001	1.15997e-24	0.287783	0.0277663	0.000243798	-0.112341	0.0305761	1.53419e-06	0.134399	0.0278915	453	0.000694987	0.00975088	LncRNA	CIBAR1	Positive
Ex	ENSG00000156162	rs7824332	13331	-60802	0.329104	1351	1608	1.14797e-14	-0.234435	0.0301721	0.00321672	0.0833284	0.028255	1.71714e-06	-0.147931	0.0308454	648	0.0011127	0.0144444	PCG	DPY19L4	Positive
Ex	BrainMetalnc.74304	rs2877453	-5862	-7745	0.402579	1568	1967	5.61166e-26	0.302667	0.028385	0.000344881	-0.106601	0.0297427	3.14954e-06	0.130589	0.0279533	531	0.00167241	0.0198545	LncRNA		Positive
Ex	ENSG00000164919	rs34830464	-6562	-26734	0.189726	835	927	5.4985e-13	-0.259557	0.0357923	0.00201445	0.0736842	0.023835	6.52613e-06	-0.164942	0.036504	372	0.00242772	0.0267627	PCG	COX6C	Positive
Ex	ENSG00000048392	rs78273535	-7283	-41742	0.0775686	362	379	3.70277e-05	0.217927	0.0527297	0.00424862	-0.0613057	0.0214222	3.0069e-13	0.392085	0.0534554	775	2.33034e-10	1.61842e-08	PCG	RRM2B	Positive
Ex	BrainMetalnc.74452	rs2515199	8305	2057	0.467253	1733	2283	0.000562105	-0.0971746	0.0281353	1.06401e-05	0.145627	0.0329999	3.14012e-07	-0.14615	0.0284942	642	0.000201596	0.00358995	LncRNA	ATP6V1C1	Positive
Ex	BrainMetalnc.74454	rs146518149	101381	-64349	0.0542366	260	265	0.0113436	-0.160794	0.0634583	0.145521	0.0308345	0.0211775	1.00293e-06	-0.311853	0.063597	657	0.000658923	0.00933922	LncRNA		Positive
Ex	ENSG00000164933	rs1436595	34497	25348	0.445559	1691	2177	1.4664e-70	-0.492142	0.0268183	3.46619e-06	0.143122	0.0307669	6.24674e-11	-0.179714	0.0273656	634	3.96043e-08	1.52807e-06	PCG	SLC25A32	Positive
Ex	ENSG00000271830	rs4517090	-21033	-21386	0.365125	1473	1784	1.56573e-108	0.632259	0.0271433	1.66171e-06	-0.131742	0.0274319	7.85003e-09	0.15894	0.0274413	631	4.95337e-06	0.000118625	LncRNA	AC012213.4	Positive
Ex	BrainMetalnc.74505	rs776960	3655	-19160	0.424273	1614	2073	3.94678e-42	0.378051	0.0272675	2.14992e-07	-0.156589	0.0301089	1.68945e-13	0.201307	0.0271547	408	6.89295e-11	5.31906e-09	LncRNA	OXR1	Positive
Ex	BrainMetalnc.74536	rs2514842	-171802	-175898	0.451494	1711	2206	1.01303e-17	-0.243067	0.0281382	3.20152e-07	0.164652	0.0321245	6.80943e-12	-0.196175	0.0284495	381	2.59439e-09	1.33467e-07	LncRNA	EIF3E	Positive
Ex	ENSG00000136982	rs7817522	194335	172417	0.317438	1304	1551	1.0175e-15	-0.243989	0.030201	0.000303126	0.100335	0.0277335	8.55758e-08	-0.163632	0.0304641	421	3.60274e-05	0.000769878	PCG	DSCC1	Positive
Ex	ENSG00000155792	rs2326427	67235	-55282	0.0871879	401	426	3.03942e-31	0.571731	0.0484921	0.00678565	-0.0578001	0.0213324	4.43475e-06	0.227286	0.0494069	450	0.00199564	0.023491	PCG	DEPTOR	Positive
Ex	BrainMetalnc.74754	rs13280282	1215	-3040	0.299222	1263	1462	1.26302e-88	0.609389	0.0292916	0.00373539	-0.0741585	0.02555	3.31522e-06	0.136608	0.0293084	685	0.00227092	0.0256448	LncRNA	ZHX2	Positive
Ex	ENSG00000245149	rs7812363	-4679	-16776	0.39869	1552	1948	1.0233e-94	-0.573142	0.0265514	0.00135127	0.0906184	0.0282426	3.67911e-07	-0.135463	0.0265672	756	0.000278141	0.00444066	LncRNA	RNF139-AS1	Positive
Ex	ENSG00000132294	rs2036355	83008	-26541	0.172738	765	844	4.41307e-87	-0.713451	0.0346288	0.0116705	0.0561589	0.0222512	2.80449e-06	-0.166309	0.0354175	593	0.00166306	0.0198545	PCG	EFR3A	Positive
Ex	BrainMetalnc.74967	rs6471044	2219	-3863	0.484445	1788	2367	2.87365e-74	0.498735	0.0264254	8.86725e-08	-0.169845	0.0316592	2.61156e-13	0.192505	0.0261766	590	1.54082e-10	1.12642e-08	LncRNA	KCNQ3	Positive
Ex	BrainMetalnc.75038	rs35016631	71588	-62965	0.439214	1683	2146	4.10723e-29	0.319854	0.0281907	0.000668341	-0.106586	0.0312878	5.65328e-06	0.1271	0.0279401	583	0.00329586	0.0341638	LncRNA	KHDRBS3	Positive
Ex	BrainMetalnc.75160	rs11781111	341	-13344	0.287966	1199	1407	8.36201e-31	-0.355643	0.0303974	1.05288e-05	0.116598	0.026408	1.52159e-08	-0.176159	0.0310231	874	1.32987e-05	0.000297934	LncRNA		Positive
Ex	ENSG00000171045	rs72687362	64875	-126227	0.191977	848	938	1.97885e-55	-0.553204	0.0343852	0.00207486	0.0725232	0.0235265	5.38774e-07	-0.172995	0.0344241	956	0.000515068	0.00753083	PCG	TSNARE1	Positive
Ex	ENSG00000261693	rs13257833	-216272	-219648	0.0605813	285	296	3.24769e-10	0.371003	0.0587711	0.107346	-0.0344395	0.0213799	2.95095e-07	0.294785	0.0573409	837	0.000246995	0.00413344	LncRNA	AC134682.1	Positive
Ex	BrainMetalnc.75198	rs13255558	8866	4478	0.314572	1298	1537	1.48293e-77	0.555086	0.0287198	0.0012435	-0.0850772	0.0263194	5.33095e-07	0.142875	0.0284188	796	0.000424343	0.00640666	LncRNA	JRK	Positive
Ex	ENSG00000167653	rs2976388	8530	-3887	0.446173	1704	2180	1.25713e-84	0.540123	0.0266337	2.77007e-06	-0.141433	0.0301035	1.50424e-11	0.182303	0.0268892	792	1.19136e-08	5.33806e-07	PCG	PSCA	Positive
Ex	ENSG00000180155	rs13362	349	-6262	0.27282	1140	1333	2.09018e-135	0.737687	0.0279314	0.00205425	-0.0722736	0.0234229	4.3797e-06	0.127131	0.0276196	839	0.00367457	0.0372553	PCG	LYNX1	Positive
Ex	ENSG00000160932	rs1130985	572	-5278	0.323782	1334	1582	1.67654e-19	-0.275165	0.0302061	1.16498e-05	0.121982	0.0277665	1.76361e-06	-0.146329	0.0305457	816	0.00143911	0.0178475	PCG	LY6E	Positive
Ex	ENSG00000176956	rs56068534	20808	18011	0.446377	1713	2181	4.60012e-71	-0.501241	0.0272081	2.65741e-07	0.158082	0.0306314	1.15318e-09	-0.165756	0.0271266	773	8.91408e-07	2.75148e-05	PCG	LY6H	Positive
Ex	ENSG00000185730	rs2450771	38952	28676	0.283872	1180	1387	3.43651e-18	0.269444	0.0307416	8.22687e-05	-0.103687	0.0262873	4.12053e-09	0.180785	0.0306374	694	2.85965e-06	7.49444e-05	PCG	ZNF696	Positive
Ex	ENSG00000147813	rs1062391	5387	1840	0.379451	1515	1854	1.72167e-235	-0.877555	0.023891	1.68304e-05	0.104847	0.0243159	7.3038e-09	-0.137247	0.0236459	647	4.72556e-06	0.000115154	PCG	NAPRT	Positive
Ex	ENSG00000179886	rs4873808	13849	8471	0.136717	630	668	0.000168676	-0.158059	0.0419514	0.0160242	0.0559203	0.023203	5.97244e-06	-0.190226	0.0419244	649	0.00387611	0.0387333	PCG	TIGD5	Positive
Ex	ENSG00000104524	rs6558375	-2647	-9195	0.321736	1327	1572	3.89502e-16	-0.248422	0.0303017	0.000202954	0.103358	0.0277772	2.24761e-07	-0.154172	0.0296919	648	0.000145645	0.00270037	PCG	PYCR3	Positive
Ex	ENSG00000180921	rs9650469	31227	16926	0.427343	1620	2088	2.77805e-229	0.827421	0.0229036	0.0128887	-0.0642491	0.0258167	3.80758e-07	0.117505	0.023075	642	0.000244446	0.00413344	PCG	FAM83H	Positive
Ex	BrainMetalnc.75330	rs4977190	-55931	-66545	0.471347	1759	2303	8.44527e-25	-0.289289	0.0278267	5.31902e-07	0.163681	0.0325545	8.38399e-10	-0.173963	0.028232	603	5.05555e-07	1.59594e-05	LncRNA	MROH1	Positive
Ex	ENSG00000071894	rs11991724	-42310	-58571	0.407491	1566	1991	3.01572e-224	-0.825379	0.0231634	1.49074e-07	0.133594	0.025354	4.42573e-09	-0.140691	0.0238913	440	1.94732e-06	5.40966e-05	PCG	CPSF1	Positive
Ex	ENSG00000160948	rs4925820	-11836	-16798	0.466844	1752	2281	3.97013e-17	0.239223	0.0282233	3.86484e-05	-0.137578	0.0333684	1.13173e-06	0.135858	0.0278421	431	0.000487775	0.00728515	PCG	VPS28	Positive
Ex	BrainMetalnc.75363	rs10108836	104097	101817	0.467253	1737	2283	3.62036e-16	0.228559	0.0278482	2.10923e-06	-0.156992	0.0330223	2.83595e-08	0.15506	0.0278412	387	1.09751e-05	0.000254074	LncRNA		Positive
Ex	ENSG00000160957	rs2721173	7758	1200	0.474212	1743	2317	1.63442e-21	-0.264364	0.0274912	0.000184402	0.122186	0.0326244	2.94588e-06	-0.127649	0.0272433	390	0.00114889	0.014776	PCG	RECQL4	Positive
Ex	ENSG00000255085	rs11248208	-112631	-120795	0.281621	1179	1376	6.90065e-05	-0.125575	0.0314995	0.00454108	0.0764049	0.026898	6.6976e-06	-0.141122	0.0312706	310	0.00207626	0.0242346	Other	-	Positive
Ex	ENSG00000161016	rs2955194	-26244	-29065	0.474212	1747	2317	5.36995e-89	0.540336	0.0259124	0.000200726	-0.11642	0.0312641	9.19942e-07	0.128674	0.0261496	251	0.000230905	0.00402068	PCG	RPL8	Positive
Ex	ENSG00000196922	rs4628292	52387	25438	0.0800246	380	391	1.15651e-167	1.36294	0.0455776	0.03461	-0.0399918	0.0189169	5.83618e-08	0.24027	0.0441616	216	1.26061e-05	0.000287048	Other	-	Positive
Ex	ENSG00000139044	rs7136116	-46130	-149700	0.248465	1061	1214	3.02311e-10	0.20631	0.0326237	0.00672102	-0.0687857	0.0253571	1.26319e-06	0.158962	0.0327242	676	0.000853915	0.0145401	PCG	B4GALNT3	Positive
Ex	ENSG00000177406	rs76914074	28721	-4617	0.172943	763	845	1.16708e-154	0.915815	0.0321095	4.49706e-05	-0.0840999	0.0205737	1.57912e-11	0.217994	0.0321875	781	1.2333e-08	8.47777e-07	LncRNA	NINJ2-AS1	Positive
Ex	BrainMetalnc.14950	rs11554421	-23181	-32049	0.121367	553	593	1.48538e-05	0.187514	0.0432096	0.00879441	-0.0596027	0.0227313	5.30011e-07	0.21322	0.0424015	809	0.000428779	0.00820426	LncRNA	WNK1	Positive
Ex	BrainMetalnc.14981	rs10848519	31985	-97677	0.31887	1277	1558	0.00383996	0.0858225	0.0296574	0.00606156	-0.0766475	0.0279039	9.24117e-07	0.143535	0.0291751	948	0.000876063	0.0147816	LncRNA	WNT5B	Positive
Ex	ENSG00000111186	rs2270038	110848	-6473	0.330741	1328	1616	4.35396e-21	0.27672	0.0290943	5.61567e-05	-0.109229	0.0270668	3.84815e-10	0.17991	0.028621	931	3.58263e-07	1.58318e-05	PCG	WNT5B	Positive
Ex	BrainMetalnc.15004	rs73035639	29069	22584	0.113795	516	556	1.60153e-08	0.248145	0.0437688	0.00819127	-0.0585291	0.0221178	4.40253e-08	0.239348	0.0435867	1038	4.56983e-05	0.00122922	LncRNA	CACNA1C	Positive
Ex	BrainMetalnc.15012	rs216031	2081	-616	0.227384	992	1111	3.07777e-34	0.411963	0.0332479	0.00826509	-0.0658662	0.0249191	3.88556e-07	0.17141	0.0336862	985	0.000382728	0.00739941	LncRNA	CACNA1C	Positive
Ex	BrainMetalnc.15121	rs76894370	1924	-11459	0.0728612	342	356	1.19559e-20	-0.506188	0.0538406	0.0794659	0.0369741	0.0210736	1.65817e-06	-0.263291	0.0548185	758	0.00125689	0.0204561	LncRNA	CD27	Positive
Ex	ENSG00000215039	rs76894370	1512	-10448	0.0728612	342	356	2.12661e-17	-0.461708	0.0539972	0.0526036	0.0409827	0.0211349	1.67214e-06	-0.263963	0.0549779	758	0.00126749	0.0204561	LncRNA	CD27-AS1	Positive
Ex	ENSG00000089693	rs2302366	5097	-14382	0.344454	1390	1683	5.34082e-07	-0.14951	0.0297408	0.000116718	0.111809	0.0289722	1.22085e-06	-0.147711	0.0303653	736	0.000898547	0.0150243	PCG	MLF2	Positive
Ex	ENSG00000111669	rs11064426	-23026	-26841	0.320508	1311	1566	6.65443e-11	0.197739	0.0301545	0.0181805	-0.0651069	0.0275466	3.41243e-06	0.144264	0.0309908	738	0.00251837	0.0345622	PCG	TPI1	Positive
Ex	ENSG00000177675	rs8815	8445	-95925	0.351412	1417	1717	5.15099e-14	-0.2239	0.0295665	0.00021916	0.103485	0.0279584	2.90329e-07	-0.150871	0.0293295	740	0.000214844	0.00458333	PCG	CD163L1	Positive
Ex	ENSG00000226711	rs7308365	40216	4274	0.363283	1480	1775	0.00195938	-0.0934482	0.0301476	1.41408e-07	0.157919	0.029915	1.20978e-12	-0.214155	0.0299857	703	8.50475e-10	7.17492e-08	LncRNA	FAM66C	Positive
Ex	BrainMetalnc.15222	rs12810138	59650	-153808	0.196889	878	962	1.82023e-22	-0.347657	0.0353016	6.29966e-08	0.132785	0.0244678	5.22178e-17	-0.297585	0.0352455	761	3.97377e-14	5.67333e-12	LncRNA		Positive
Ex	ENSG00000286504	rs4882939	156803	152962	0.418338	1619	2044	4.32878e-94	-0.568651	0.0264408	3.85183e-08	0.158314	0.0287053	2.6657e-12	-0.185986	0.0264551	694	1.85e-09	1.49287e-07	LncRNA	AC092745.4	Positive
Ex	ENSG00000139187	rs979024890	83397	22681	0.303725	1270	1484	2.91101e-96	0.619313	0.028433	3.08847e-10	-0.16007	0.0253253	5.42605e-18	0.246337	0.028277	662	3.59205e-15	7.4076e-13	PCG	KLRG1	Positive
Ex	BrainMetalnc.15303	rs118179644	-79973	-88362	0.0661072	304	323	3.55679e-71	0.974865	0.0528716	0.479358	-0.014291	0.0202009	2.49948e-07	0.278701	0.0538828	603	0.000150719	0.00349668	LncRNA		Positive
Ex	ENSG00000225231	rs118179644	-81371	-88362	0.0661072	304	323	6.40743e-72	0.980251	0.0528616	0.532778	-0.0126002	0.0201971	2.95579e-06	0.252384	0.0538726	603	0.00178234	0.026517	LncRNA	LINC02470	Positive
Ex	ENSG00000273079	rs11055522	112865	-431195	0.282849	1175	1382	0.000262062	0.114022	0.0311916	0.00135084	-0.0881728	0.0274796	1.34175e-06	0.156749	0.0323489	982	0.00131759	0.0209013	PCG	GRIN2B	Positive
Ex	BrainMetalnc.15424	rs4763352	24256	-13835	0.273639	1139	1337	1.60851e-14	0.23785	0.0307856	1.91139e-07	-0.138872	0.0265896	2.31181e-17	0.272742	0.0319346	877	2.02746e-14	3.42088e-12	LncRNA	GRIN2B	Positive
Ex	ENSG00000261324	rs12818627	8084	2657	0.423045	1598	2067	2.3501e-35	0.342947	0.0272002	4.68045e-07	-0.152291	0.030141	1.62134e-09	0.161814	0.026724	505	8.18775e-07	3.30358e-05	LncRNA	HIST4H4	Positive
Ex	BrainMetalnc.15617	rs2193181	12853	-5483	0.299427	1263	1463	2.37982e-10	0.199907	0.0314252	0.000235638	-0.102631	0.0278671	1.60539e-07	0.166962	0.0317697	571	9.16679e-05	0.00223863	LncRNA	ST8SIA1	Positive
Ex	ENSG00000152944	rs7132644	-13203	-57000	0.195456	848	955	1.28995e-15	-0.281691	0.0349967	0.00653773	0.0658333	0.0241869	3.3934e-06	-0.159404	0.0342346	710	0.00240931	0.0338764	PCG	MED21	Positive
Ex	ENSG00000285517	rs10161250	18923	-64887	0.212239	914	1037	5.12667e-43	0.461347	0.0329022	0.00153152	-0.0760763	0.0239819	7.78041e-10	0.200396	0.0324586	725	5.6408e-07	2.43473e-05	LncRNA	AC010198.2	Positive
Ex	BrainMetalnc.15838	rs1677173	53681	-16492	0.278142	1176	1359	0.00261316	0.0960908	0.0318918	1.46872e-05	-0.116122	0.0267432	2.92105e-10	0.197971	0.0312785	797	2.32808e-07	1.0726e-05	LncRNA		Positive
Ex	ENSG00000188906	rs11176495	215681	43140	0.385387	1512	1883	3.96389e-06	0.133988	0.0289778	0.000652946	-0.103151	0.0302229	7.88313e-06	0.129484	0.0289159	459	0.00361836	0.0444746	PCG	LRRK2	Positive
Ex	ENSG00000165966	rs61924137	233121	-153304	0.25747	1104	1258	1.23933e-165	0.836279	0.028167	0.00691534	-0.0614021	0.0227147	1.25065e-07	0.151333	0.0285445	514	6.42837e-05	0.0016123	PCG	PDZRN4	Positive
Ex	BrainMetalnc.16089	rs59402225	46085	37533	0.0691772	326	338	1.5608e-05	-0.24174	0.0558465	0.0552375	0.0413423	0.0215558	5.03879e-08	-0.30162	0.0551696	509	2.56475e-05	0.000762999	LncRNA	PPHLN1	Positive
Ex	BrainMetalnc.16129	rs4362200	-64078	-161310	0.201801	883	986	3.04181e-05	0.146959	0.035173	0.00384389	-0.0719434	0.024864	8.16989e-08	0.1932	0.0359124	329	2.68789e-05	0.000779489	LncRNA	NELL2	Positive
Ex	ENSG00000273015	rs7979828	510440	500711	0.255014	1083	1246	0.0294111	-0.0709232	0.0325453	0.0121105	0.0660271	0.0262974	7.71447e-06	-0.146753	0.0327383	339	0.00261521	0.0346702	LncRNA	AC008124.1	Positive
Ex	BrainMetalnc.16170	rs7979828	510440	500677	0.255014	1083	1246	0.0275935	-0.0717387	0.0325443	0.0120553	0.0660677	0.0262966	7.5992e-06	-0.146855	0.0327373	339	0.00257613	0.0345622	LncRNA		Positive
Ex	ENSG00000269514	rs1489105	176127	144209	0.2544	1095	1243	2.56412e-05	0.139045	0.0329711	0.000777501	-0.0890127	0.0264531	1.29731e-06	0.158396	0.0326434	591	0.000766711	0.0134538	LncRNA	AC024257.3	Positive
Ex	BrainMetalnc.16308	rs2293449	18065	-6565	0.451903	1717	2208	0	-1.03207	0.0200227	1.19323e-07	0.11943	0.0224902	4.80701e-10	-0.125604	0.0200943	423	2.03337e-07	9.67674e-06	LncRNA	CCDC65	Positive
Ex	BrainMetalnc.16307	rs75229836	-38187	-47382	0.0562833	267	275	9.01618e-09	0.353963	0.0613626	0.26343	-0.0237601	0.0212414	1.291e-06	0.29509	0.060802	411	0.000530603	0.00975048	LncRNA	AC073610.1	Positive
Ex	ENSG00000169884	rs2070940	-7630	-14025	0.439419	1695	2147	2.07791e-166	-0.744027	0.024991	2.16395e-06	0.131662	0.0277249	8.97716e-09	-0.146093	0.0253232	431	3.86916e-06	0.000138099	PCG	WNT10B	Positive
Ex	BrainMetalnc.16400	rs10747586	-153019	-153773	0.351412	1409	1717	5.24543e-10	-0.183847	0.0294774	0.00188634	0.088968	0.0285982	7.06786e-06	-0.132242	0.0293779	354	0.00250202	0.0345622	LncRNA	DIP2B	Positive
Ex	ENSG00000050426	rs66781280	20167	7705	0.163528	730	799	3.15913e-38	0.487064	0.0370299	0.0144669	-0.0565268	0.0230985	1.57962e-08	0.208132	0.0366957	379	5.98675e-06	0.000202026	PCG	LETMD1	Positive
Ex	BrainMetalnc.16456	rs10747620	-8871	-15449	0.121981	555	596	0.000193904	0.160857	0.043096	0.0330454	-0.0486651	0.0228181	6.12584e-08	0.231964	0.0427035	604	3.70001e-05	0.00102496	LncRNA	SCN8A	Positive
Ex	ENSG00000205426	rs12832364	19516	13895	0.375154	1480	1833	1.09141e-155	0.722679	0.0252401	4.96949e-06	-0.117814	0.0257443	1.09997e-10	0.16282	0.0251232	698	7.67779e-08	4.19117e-06	PCG	KRT81	Positive
Ex	ENSG00000170523	rs998820	4661	-2436	0.367171	1446	1794	1.45772e-196	-0.79079	0.0240521	4.83453e-14	0.183197	0.0241648	1.59045e-23	-0.238576	0.0236212	706	1.12286e-20	6.94675e-18	PCG	KRT83	Positive
Ex	ENSG00000257303	rs57343616	-70513	-88429	0.0599673	286	293	6.53408e-84	-1.12954	0.0559597	0.137013	0.0291961	0.0196277	4.10619e-06	-0.284278	0.0615795	341	0.00140021	0.0220236	LncRNA	AC073896.2	Positive
Ex	BrainMetalnc.16885	rs699562	7089	-11845	0.460295	1727	2249	8.08337e-05	-0.111957	0.0283536	5.10656e-05	0.131803	0.0324802	3.46366e-08	-0.157074	0.0283832	566	1.96043e-05	0.000606426	LncRNA	PPM1H	Positive
Ex	ENSG00000255693	rs4964102	22241	-85011	0.295129	1230	1442	3.32962e-174	-0.812923	0.0265767	9.88406e-05	0.0917116	0.0235165	7.75877e-07	-0.133603	0.0269674	444	0.000344489	0.00687497	LncRNA	LINC02389	Positive
Ex	BrainMetalnc.16949	rs4964102	13559	-76885	0.295129	1230	1442	8.23728e-107	-0.653016	0.0282872	6.16307e-05	0.100458	0.0250301	5.98134e-08	-0.156037	0.028703	433	2.58992e-05	0.000762999	LncRNA	AC078815.1	Positive
Ex	ENSG00000155957	rs4328252	-26064	-60290	0.445559	1697	2177	9.83061e-120	-0.636462	0.0258501	0.00106572	0.100016	0.0305253	2.46185e-06	-0.122229	0.0258824	479	0.00117922	0.0195414	PCG	TMBIM4	Positive
Ex	BrainMetalnc.17032	rs317659	29391	23313	0.448219	1680	2190	1.00111e-18	0.246543	0.0276795	1.33235e-06	-0.158253	0.0326498	1.4251e-10	0.179467	0.0278632	663	9.44839e-08	5.01034e-06	LncRNA	CPSF6	Positive
Ex	ENSG00000166226	rs3201	-5847	-21958	0.339542	1354	1659	0.000123884	-0.112986	0.0293889	5.62509e-05	0.112492	0.0278783	3.57035e-06	-0.139588	0.0300471	645	0.00230288	0.032627	PCG	CCT2	Positive
Ex	ENSG00000139291	rs34167041	115830	96865	0.100696	472	492	0.0285711	0.104769	0.0478255	0.0418449	-0.0454895	0.0223412	1.43742e-06	0.23439	0.0485104	446	0.00064109	0.0116653	PCG	TMEM19	Positive
Ex	BrainMetalnc.17114	rs17725193	14214	-13383	0.159026	720	777	1.1531e-55	-0.60106	0.0372741	0.00218954	0.0695258	0.0226726	1.6233e-10	-0.23993	0.0373672	429	6.96395e-08	3.91669e-06	LncRNA	TRHDE	Positive
Ex	ENSG00000236333	rs12426189	17152	-9838	0.161686	730	790	2.89237e-81	-0.712768	0.0359417	1.39991e-05	0.0960022	0.0220556	6.02265e-17	-0.302323	0.0358797	429	2.58372e-14	3.99615e-12	LncRNA	TRHDE-AS1	Positive
Ex	BrainMetalnc.17165	rs61932901	136542	-16918	0.0918952	425	449	3.62195e-19	-0.434625	0.0481696	0.0483249	0.0431323	0.0218337	6.3811e-07	-0.23856	0.0477837	574	0.000366275	0.00723199	LncRNA	KCNC2	Positive
Ex	ENSG00000111615	rs1604381	13697	-7049	0.252763	1067	1235	4.13593e-196	0.872199	0.0265651	1.16923e-12	-0.152766	0.0213757	1.62664e-28	0.292379	0.0260618	572	9.3044e-26	8.63448e-23	PCG	KRR1	Positive
Ex	ENSG00000186908	rs4421791	107181	17588	0.307	1255	1500	2.41306e-09	-0.181567	0.0303132	0.00457979	0.0779727	0.0274762	1.18122e-06	-0.152919	0.0313934	664	0.000784331	0.0134869	PCG	ZDHHC17	Positive
Ex	BrainMetalnc.17205	rs56105467	-85966	-90343	0.207532	903	1014	2.12498e-12	-0.244312	0.0345931	0.00715182	0.0662483	0.0246097	4.09102e-06	-0.161593	0.0349978	621	0.00254053	0.0345622	LncRNA	ZDHHC17	Positive
Ex	BrainMetalnc.17339	rs11115558	5091	-463	0.332583	1377	1625	6.33693e-32	-0.357807	0.0299946	0.000226547	0.104794	0.0283768	8.32399e-08	-0.162866	0.0302931	397	3.30462e-05	0.0009293	LncRNA	TMTC2	Positive
Ex	ENSG00000185046	rs76399902	17908	-1240289	0.0716332	333	350	3.32122e-15	0.428678	0.0540618	0.0907934	-0.0364266	0.02153	2.72757e-06	0.241653	0.0514	896	0.00244391	0.0341044	PCG	ANKS1B	Positive
Ex	BrainMetalnc.17912	rs10778514	40959	33460	0.243758	1046	1191	4.94055e-05	0.134448	0.0330687	0.00060779	-0.089223	0.0259928	4.62788e-07	0.168701	0.0333744	496	0.000229543	0.00484127	LncRNA	RIC8B	Positive
Ex	ENSG00000139405	rs16942667	58699	51857	0.0661072	314	323	2.43154e-76	-1.04088	0.054324	0.202741	0.0255508	0.0200537	4.62731e-06	-0.242213	0.0527542	590	0.00273011	0.0354342	PCG	RITA1	Positive
Ex	ENSG00000122965	rs7970186	1594	-147993	0.405649	1591	1982	4.29246e-09	0.169722	0.028796	1.9872e-12	-0.217657	0.0307775	9.89179e-19	0.252902	0.028389	880	8.70478e-16	2.01951e-13	PCG	RBM19	Positive
Ex	ENSG00000088992	rs7979277	805	-59751	0.133852	609	654	7.83813e-150	-1.02541	0.0366216	0.00364834	0.0580511	0.0199496	1.07802e-10	-0.236569	0.0364854	966	1.04136e-07	5.3688e-06	PCG	TESC	Positive
Ex	ENSG00000089220	rs2018619	38685	29225	0.47544	1741	2323	1.86343e-92	0.543453	0.0255163	3.24664e-06	-0.138302	0.0296442	1.36265e-10	0.165141	0.0256116	846	1.1528e-07	5.78269e-06	PCG	PEBP1	Positive
Ex	BrainMetalnc.18344	rs434471	50939	-96510	0.281416	1188	1375	3.80336e-07	0.16151	0.0317151	0.00137646	-0.0861929	0.0269081	3.36693e-07	0.165898	0.0324284	611	0.00020572	0.00449195	LncRNA	CIT	Positive
Ex	ENSG00000257218	rs606443	26383	9078	0.336472	1376	1644	0	-1.07217	0.0213312	0.000109024	0.0785979	0.0202785	1.02445e-06	-0.103859	0.0211984	481	0.000492759	0.00914562	PCG	GATC	Positive
Ex	BrainMetalnc.18393	rs61945858	-36698	-54380	0.190749	839	932	4.02128e-100	0.740307	0.0332508	0.343341	-0.0211281	0.0222924	7.06374e-07	0.161908	0.0325598	486	0.000343298	0.00687497	LncRNA	DYNLL1	Positive
Ex	ENSG00000110871	rs2235218	-52463	-83539	0.302906	1258	1480	2.89864e-151	0.75789	0.0269181	4.16684e-07	-0.119308	0.0235089	1.28544e-10	0.172601	0.0267314	474	6.09299e-08	3.53393e-06	PCG	COQ5	Positive
Ex	BrainMetalnc.18406	rs2686556	39165	-47154	0.295538	1228	1444	7.56121e-33	-0.366017	0.0302117	2.61545e-05	0.112242	0.026644	1.30764e-09	-0.182546	0.0299745	462	6.04128e-07	2.54832e-05	LncRNA	MLEC	Positive
Ex	ENSG00000122971	rs998727	-14565	-28747	0.409947	1605	2003	8.55887e-123	0.651922	0.0261015	5.79428e-08	-0.150205	0.027601	7.63802e-13	0.184251	0.0255686	462	3.52876e-10	3.11875e-08	PCG	ACADS	Positive
Ex	ENSG00000157895	rs12427353	-13415	-27404	0.19648	861	960	1.35285e-37	-0.449416	0.0344775	0.00101495	0.0776579	0.0236019	1.61084e-06	-0.170458	0.0354471	462	0.000744208	0.0132812	PCG	C12orf43	Positive
Ex	BrainMetalnc.18421	rs504677	110826	-41593	0.416496	1603	2035	4.11622e-40	0.373964	0.0276995	0.000352166	-0.107053	0.0299147	3.37088e-06	0.129592	0.0278238	491	0.0016551	0.0249746	LncRNA	P2RX7	Positive
Ex	ENSG00000089041	rs531095	35134	-18247	0.400327	1561	1956	2.03227e-34	0.349683	0.0281413	0.000779923	-0.0992292	0.0294969	5.98644e-06	0.12798	0.0282089	455	0.00272383	0.0354342	PCG	P2RX7	Positive
Ex	BrainMetalnc.18501	rs9705654	83391	43056	0.26095	1112	1275	1.52067e-34	0.392156	0.0314969	6.69082e-05	-0.101289	0.0253607	7.26816e-10	0.202915	0.0328086	326	2.36942e-07	1.0726e-05	LncRNA	RSRC2	Positive
Ex	ENSG00000119242	rs4930725	24955	-29216	0.351412	1417	1717	1.79714e-19	-0.266355	0.029264	6.42899e-08	0.15625	0.0288112	1.56958e-14	-0.220796	0.0285664	736	1.15521e-11	1.42938e-09	PCG	CCDC92	Positive
Ex	BrainMetalnc.18599	rs10846673	2453	508	0.406877	1581	1988	1.5271e-17	-0.244921	0.0285128	8.40073e-05	0.120989	0.0307132	2.17035e-07	-0.149487	0.0287533	931	0.000202059	0.00446454	LncRNA	NCOR2	Positive
Ex	ENSG00000279233	rs12581180	58903	55437	0.314368	1310	1536	3.61165e-167	0.797296	0.0267085	2.19024e-07	-0.126554	0.0243502	2.66081e-09	0.161063	0.0269627	1025	2.72733e-06	9.92533e-05	Other	-	Positive
Ex	BrainMetalnc.18664	rs10744255	233938	-98234	0.226975	982	1109	1.2569e-08	0.192287	0.0336675	0.000414053	-0.0894769	0.0253057	2.60037e-09	0.202018	0.0337973	941	2.44695e-06	9.08309e-05	LncRNA		Positive
Ex	ENSG00000255595	rs971151	169444	-73376	0.399099	1558	1950	1.42746e-138	0.677465	0.0253128	1.36831e-13	-0.197102	0.0264855	2.17203e-21	0.240764	0.0251165	902	1.95917e-18	9.09055e-16	LncRNA	AC007368.1	Positive
Ex	ENSG00000214043	rs10444441	37282	3329	0.203029	883	992	3.12951e-08	-0.193202	0.0347985	0.000821069	0.0821826	0.0245338	7.67851e-08	-0.191821	0.0355815	791	6.0737e-05	0.00156567	LncRNA	LINC02347	Positive
Ex	ENSG00000286662	rs9804910	2525	-59826	0.139582	633	682	6.04792e-110	-0.868749	0.0370257	0.00274728	0.0620672	0.0207046	1.01191e-07	-0.196211	0.0367393	1232	0.000124667	0.00296643	LncRNA	AC087894.3	Positive
Ex	BrainMetalnc.18753	rs11612851	3825	-14147	0.266476	1113	1302	4.02145e-11	0.207028	0.0312091	1.39066e-07	-0.137039	0.0259443	2.96271e-15	0.253267	0.0318818	1488	4.40851e-12	5.84442e-10	LncRNA	TMEM132D	Positive
Ex	ENSG00000279128	rs7978236	10453	8481	0.379861	1502	1856	6.15392e-205	-0.8167	0.0242202	5.531e-06	0.111144	0.0244076	1.03875e-09	-0.150168	0.0245079	1259	1.30779e-06	5.05678e-05	Other	-	Positive
Ex	ENSG00000279993	rs7978236	7661	5162	0.379861	1502	1856	1.80796e-154	-0.723809	0.0253957	2.24653e-05	0.108693	0.0255922	3.59226e-09	-0.152224	0.0256974	1260	4.52625e-06	0.000158504	Other	-	Positive
Ex	ENSG00000256810	rs7978236	4112	-2265	0.379861	1502	1856	3.38236e-154	-0.723337	0.0254053	1.14284e-05	0.11258	0.0256018	6.15391e-09	-0.149957	0.0257071	1256	7.72931e-06	0.000256171	LncRNA	AC078925.1	Positive
Ex	ENSG00000185684	rs7305975	-749	-48105	0.0556693	267	272	7.71271e-36	0.771943	0.0607757	0.0356308	-0.0434048	0.0206465	4.86148e-07	0.309102	0.0612652	951	0.000462327	0.0087559	Other	-	Positive
Ex	BrainMetalnc.18849	rs7305975	-797	-48820	0.0556693	267	272	5.86863e-54	0.947129	0.0597371	0.0328221	-0.0433366	0.0202937	2.24813e-07	0.312674	0.0602183	951	0.000213797	0.00458333	LncRNA		Positive
Ex	ENSG00000177084	rs4883576	43469	-20145	0.420999	1615	2057	0	1.13494	0.0169436	5.72386e-12	-0.128907	0.0186263	6.64971e-19	0.150463	0.0168043	642	4.26912e-16	1.32058e-13	PCG	POLE	Positive
Ex	ENSG00000072609	rs28372675	55727	-21103	0.30352	1262	1483	0.00047196	0.108621	0.0310264	0.000555839	-0.0958863	0.0277379	2.81267e-07	0.161834	0.031424	557	0.000156666	0.00358977	PCG	CHFR	Positive
Ex	ENSG00000090612	rs145361758	36357	2934	0.24519	1045	1198	2.43451e-41	0.43301	0.0315534	6.60851e-06	-0.109417	0.0242299	9.35618e-12	0.220917	0.0322536	457	4.27577e-09	3.3066e-07	PCG	ZNF268	Positive
Ex	BrainMetalnc.18945	rs61951772	-94290	-95347	0.249284	1061	1218	2.3653e-23	0.322637	0.0320731	0.000272031	-0.0909751	0.0249527	2.59513e-07	0.169119	0.0327415	457	0.000118597	0.00285866	LncRNA	ZNF268	Positive
Ex	ENSG00000032742	rs2480431	31135	-93171	0.193	857	943	1.1551e-144	0.874109	0.0318595	0.00023737	-0.0790435	0.0214734	8.91048e-09	0.17856	0.0309441	756	6.73632e-06	0.000217612	PCG	IFT88	Positive
Ex	BrainMetalnc.19050	rs4770145	-11799	-12547	0.313754	1272	1533	0.0175875	0.0714609	0.0300786	0.000161596	-0.105061	0.0278055	2.61453e-07	0.159101	0.0308104	959	0.000250734	0.0044356	LncRNA	ZDHHC20	Positive
Ex	ENSG00000262619	rs73159057	9956	-27496	0.0896439	415	438	3.13725e-05	-0.205482	0.0492631	0.0113456	0.0559142	0.0220674	3.21397e-07	-0.237984	0.0464388	1180	0.000379248	0.00644199	LncRNA	LINC00621	Positive
Ex	BrainMetalnc.19095	rs68185340	-2517	-7785	0.284896	1185	1392	6.59735e-12	-0.213466	0.0309364	0.000475034	0.0917951	0.0262332	1.15653e-08	-0.177212	0.0309503	1125	1.3011e-05	0.000371814	LncRNA	SACS	Positive
Ex	ENSG00000205822	rs9511364	183804	-5715	0.451289	1721	2205	3.98647e-215	0.823852	0.0237191	0.00161277	-0.0854058	0.0270517	1.1169e-07	0.128481	0.0241392	1024	0.000114371	0.00249934	Other	-	Positive
Ex	BrainMetalnc.19121	rs8001621	21375	4262	0.449243	1713	2195	4.81908e-224	0.836829	0.0234979	0.0150721	-0.064466	0.0265034	2.91055e-06	0.11175	0.0238374	889	0.00258748	0.0295768	LncRNA		Positive
Ex	ENSG00000151849	rs7321485	71808	31198	0.31314	1276	1530	2.55173e-37	-0.38086	0.0293349	0.000209193	0.0999234	0.0269099	1.65596e-06	-0.137822	0.0286936	885	0.00146552	0.0205449	PCG	CENPJ	Positive
Ex	ENSG00000122025	rs7329160	16376	-80942	0.211625	922	1034	2.71725e-230	1.01651	0.0280612	0.000471072	-0.0700574	0.0200082	5.13447e-07	0.141103	0.0280259	743	0.000381491	0.00644199	PCG	FLT3	Positive
Ex	BrainMetalnc.19267	rs8181891	10398	-41242	0.342612	1394	1674	2.2082e-119	0.661088	0.0268951	6.76523e-10	-0.157798	0.0254665	2.24154e-14	0.204556	0.0266258	732	1.64081e-11	3.0478e-09	LncRNA		Positive
Ex	BrainMetalnc.19371	rs499966	3759	-370	0.346296	1425	1692	0.0010132	0.0995574	0.0302531	3.02927e-11	-0.19019	0.0284885	1.84705e-19	0.271544	0.0298442	530	9.78934e-17	3.63674e-14	LncRNA	N4BP2L1	Positive
Ex	ENSG00000120669	rs978746	78084	31713	0.444535	1701	2172	0	1.04713	0.0198042	2.20361e-05	-0.0967286	0.0227518	1.05013e-10	0.129645	0.0199825	571	5.99625e-08	5.28144e-06	PCG	SOHLH2	Positive
Ex	ENSG00000288598	rs8181810	49654	-23640	0.179288	799	876	2.21793e-279	1.1766	0.0287377	0.000208882	-0.0698324	0.0188043	3.67636e-07	0.146873	0.0288042	467	0.000171686	0.00327084	LncRNA	AL354833.1	Positive
Ex	BrainMetalnc.19697	rs9525974	-66570	-119557	0.471961	1727	2306	4.43115e-17	-0.231187	0.0273177	3.52863e-06	0.152003	0.0327023	2.28045e-08	-0.15687	0.0279736	520	1.18584e-05	0.00035243	LncRNA		Positive
Ex	BrainMetalnc.19716	rs113210477	18681	-54824	0.112157	512	548	5.12395e-76	0.796737	0.0416791	0.00157941	-0.0667008	0.0210862	2.53824e-07	0.214487	0.0414912	568	0.000144172	0.00281895	LncRNA		Positive
Ex	BrainMetalnc.19757	rs12860986	-48505	-50148	0.174376	770	852	1.76596e-59	0.589671	0.0352731	0.0370793	-0.0471241	0.0225903	2.51108e-06	0.166659	0.035321	622	0.00156189	0.0213305	LncRNA	RUBCNL	Positive
Ex	BrainMetalnc.19772	rs582854	19611	-603383	0.430209	1635	2102	1.93067e-25	-0.292994	0.0277928	1.33589e-05	0.137217	0.0314496	2.04859e-07	-0.144563	0.0277481	659	0.000135002	0.00271099	LncRNA		Positive
Ex	ENSG00000136143	rs9567939	128424	-163809	0.144085	645	704	1.05708e-26	0.422188	0.0390037	0.0155156	-0.0549319	0.0226821	5.13249e-09	0.22557	0.0384674	578	2.96658e-06	0.000116009	PCG	SUCLA2	Positive
Ex	ENSG00000123179	rs12853861	159815	129003	0.341384	1375	1668	1.19586e-31	0.345284	0.0290814	0.00568712	-0.0782638	0.0282771	6.5201e-06	0.131549	0.0291124	477	0.00311009	0.0339823	PCG	EBPL	Positive
Ex	ENSG00000244471	rs74777964	-568685	-666563	0.0613999	289	300	0.000112804	0.227923	0.0589318	0.215315	-0.0264911	0.0213741	9.83174e-06	0.260323	0.0587615	445	0.00437513	0.0445304	Other	-	Positive
Ex	BrainMetalnc.20297	rs61966693	237439	167234	0.106222	497	519	6.0053e-50	0.680263	0.0447416	0.00574531	-0.0592924	0.0214484	1.17071e-06	0.209624	0.043019	504	0.000590037	0.00953038	LncRNA		Positive
Ex	BrainMetalnc.20405	rs9590307	392851	344368	0.17458	784	853	2.19725e-26	-0.39773	0.036985	0.0106908	0.0601203	0.023534	7.14138e-06	-0.163013	0.0362316	318	0.00227096	0.0267829	LncRNA		Positive
Ex	BrainMetalnc.20421	rs111743401	18937	-4450	0.0601719	281	294	1.03581e-58	0.931833	0.0561363	0.298346	-0.0210809	0.0202661	1.30813e-05	0.254483	0.0582648	318	0.00415985	0.0434652	LncRNA	SLITRK5	Positive
Ex	BrainMetalnc.20565	rs11619084	77796	58863	0.212648	910	1039	1.07152e-32	0.39898	0.0330151	0.00024048	-0.0875736	0.0238124	3.04588e-09	0.195797	0.0329008	547	1.66609e-06	7.28181e-05	LncRNA	UGGT2	Positive
Ex	BrainMetalnc.20593	rs7333641	15100	-48626	0.29472	1228	1440	3.90272e-05	0.128269	0.0311276	0.000151185	-0.106226	0.0279903	9.2215e-09	0.174376	0.0302498	605	5.57901e-06	0.000188418	LncRNA	MBNL2	Positive
Ex	BrainMetalnc.20687	rs9557154	23823	23017	0.30352	1275	1483	4.51284e-63	-0.513222	0.0297347	9.59005e-05	0.103281	0.0264334	8.43795e-08	-0.160555	0.0298771	842	7.10475e-05	0.00175961	LncRNA		Positive
Ex	ENSG00000260992	rs9557154	23823	23017	0.30352	1275	1483	3.93672e-63	-0.513472	0.029734	9.85044e-05	0.103106	0.0264327	9.17592e-08	-0.160094	0.0298764	842	7.72612e-05	0.00185178	LncRNA	DOCK9-DT	Positive
Ex	ENSG00000139780	rs2390760	8712	-48	0.356734	1442	1743	4.81388e-165	-0.763529	0.0257706	3.20125e-05	0.105917	0.0254214	1.2467e-07	-0.13768	0.0259665	683	8.51499e-05	0.00191716	PCG	METTL21C	Positive
Ex	ENSG00000134897	rs1998876	49574	7160	0.382931	1524	1871	3.66342e-09	-0.173973	0.0293852	0.000298743	0.11114	0.0306881	1.34947e-06	-0.145597	0.0300545	715	0.000964868	0.0143379	PCG	BIVM	Positive
Ex	ENSG00000226620	rs7334163	91117	-3723	0.273434	1154	1336	8.4225e-23	-0.310869	0.0313109	7.00077e-05	0.104156	0.0261492	3.72884e-08	-0.173505	0.0314268	897	3.34477e-05	0.000856953	LncRNA	LINC00343	Positive
Ex	BrainMetalnc.20810	rs2025924	86935	-3742	0.276095	1166	1349	1.13219e-108	-0.672976	0.0288703	1.08567e-05	0.107144	0.0243037	1.06326e-08	-0.166311	0.0289733	893	9.49492e-06	0.000293947	LncRNA		Positive
Ex	ENSG00000272274	rs3759453	244	-148174	0.402988	1569	1969	0	1.17817	0.0165996	0.00800062	-0.0467791	0.0176244	1.41676e-07	0.0890426	0.0168687	945	0.000133883	0.00271099	LncRNA	LINC00551	Positive
Ex	ENSG00000230156	rs3759453	-85392	-103672	0.402988	1569	1969	0	1.15317	0.0172915	0.00133642	-0.0589646	0.018359	2.0481e-08	0.0988691	0.0175718	892	1.82691e-05	0.000502738	LncRNA	LINC00443	Positive
Ex	BrainMetalnc.20845	rs78701230	14554	13605	0.325215	1327	1589	3.43636e-250	-0.91782	0.0240554	0.000241885	0.0820702	0.022325	1.35414e-06	-0.114129	0.0235623	925	0.00125258	0.0178975	LncRNA		Positive
Ex	ENSG00000277863	rs78701230	14554	13605	0.325215	1327	1589	1.05036e-246	-0.912777	0.0241358	0.000276309	0.0815763	0.0223996	1.92445e-06	-0.112833	0.023641	925	0.00178012	0.0225946	LncRNA	AL162574.1	Positive
Ex	ENSG00000233695	rs9604489	6492	-5760	0.26709	1131	1305	2.889e-44	0.435116	0.030554	5.45369e-10	-0.156858	0.0251751	1.24858e-22	0.303987	0.0307445	660	8.24063e-20	6.12279e-17	LncRNA	GAS6-AS1	Positive
Ex	BrainMetalnc.21093	rs4883661	-16569	-18579	0.443921	1667	2169	4.87312e-44	0.385438	0.0271411	0.000392566	-0.110219	0.031048	4.04567e-06	0.127156	0.0275255	451	0.0018246	0.0225946	LncRNA	RASA3	Positive
Ex	BrainMetalnc.58666	rs3734141	42984	35380	0.210397	911	1028	2.398e-57	-0.538708	0.0328711	0.00572534	0.0653223	0.02362	5.66596e-06	-0.150083	0.0329957	752	0.00426081	0.0416828	LncRNA	PDCD6-AHRR	Positive
Ex	ENSG00000221990	rs3734141	37042	35380	0.210397	911	1028	9.98255e-70	-0.592441	0.0324945	0.00414946	0.0669957	0.0233493	5.827e-06	-0.148169	0.0326177	752	0.0043819	0.042145	LncRNA	EXOC3-AS1	Positive
Ex	BrainMetalnc.58676	rs28406978	-3166	-98392	0.309251	1260	1511	0.0451767	-0.0607086	0.0302932	0.000414853	0.0954477	0.0269982	3.05091e-07	-0.157586	0.030691	1020	0.000311193	0.00532762	LncRNA	ZDHHC11	Positive
Ex	ENSG00000188818	rs77920685	-32614	-87994	0.0532133	252	260	6.17964e-47	0.900977	0.0612908	0.0582582	-0.0387841	0.0204704	4.07864e-06	0.279541	0.0605348	1021	0.00416429	0.0409728	PCG	ZDHHC11	Positive
Ex	ENSG00000145506	rs2241608	51768	21627	0.441261	1689	2156	7.81965e-52	-0.425367	0.0274201	1.07025e-08	0.175037	0.0304994	1.89147e-13	-0.200332	0.0270791	1173	2.21869e-10	2.26674e-08	PCG	NKD2	Positive
Ex	ENSG00000188002	rs17596501	-41663	-76748	0.348956	1410	1705	1.07287e-147	-0.726071	0.0261479	0.00441265	0.0727087	0.0255144	2.53436e-06	-0.120875	0.0256279	1370	0.00347208	0.0358084	Other	-	Positive
Ex	ENSG00000288549	rs904732	20869	15796	0.456815	1718	2232	3.33472e-61	0.458023	0.0269752	0.000581448	-0.108915	0.0316185	4.79667e-07	0.136618	0.0270643	1357	0.000650908	0.00977505	LncRNA	AC026412.4	Positive
Ex	ENSG00000248994	rs72710616	169594	-18948	0.158412	706	774	3.58294e-42	0.514575	0.0370944	0.000262932	-0.0818319	0.022391	1.07725e-09	0.225075	0.0367682	1570	1.69129e-06	6.62226e-05	LncRNA	AC124852.1	Positive
Ex	BrainMetalnc.58738	rs10066840	-24070	-32752	0.238641	1011	1166	9.73745e-05	0.12711	0.0325629	1.8226e-06	-0.12079	0.0252496	4.85506e-15	0.24822	0.0314964	1443	7.00585e-12	1.16814e-09	LncRNA		Positive
Ex	BrainMetalnc.58815	rs10223220	-465	-3303	0.417724	1601	2041	6.89314e-77	0.511267	0.0265786	1.06865e-05	-0.13492	0.0305802	1.47571e-08	0.155884	0.0274268	842	1.24255e-05	0.000349315	LncRNA	ADAMTS16	Positive
Ex	ENSG00000133398	rs271398	-2590	-9263	0.499795	1811	2442	4.36286e-21	0.261403	0.0274845	1.54102e-05	-0.149645	0.0345481	6.32741e-09	0.161004	0.027623	829	5.24542e-06	0.000176082	PCG	MED10	Positive
Ex	BrainMetalnc.58896	rs2892607	3440	244	0.20221	888	988	1.08468e-37	-0.446353	0.0341952	0.000865904	0.079127	0.0237265	8.90111e-11	-0.226609	0.034792	713	6.34649e-08	3.74662e-06	LncRNA	ADCY2	Positive
Ex	ENSG00000124275	rs11134265	11082	-43757	0.355506	1448	1737	7.3348e-42	0.403394	0.0291966	6.26473e-05	-0.111556	0.0278221	1.74563e-08	0.164392	0.0290729	713	1.24464e-05	0.000349315	PCG	MTRR	Positive
Ex	BrainMetalnc.59022	rs852633	8679	4727	0.364102	1444	1779	1.13061e-06	-0.14223	0.0291469	1.2818e-05	0.128479	0.0293857	8.33807e-09	-0.166129	0.0287334	785	6.54539e-06	0.000215494	LncRNA	CTNND2	Positive
Ex	BrainMetalnc.59068	rs245577	-9575	-34235	0.198936	878	972	1.96019e-18	0.309143	0.0350113	2.53727e-06	-0.113639	0.0240951	2.43412e-17	0.295949	0.0346767	610	1.48481e-14	4.23667e-12	LncRNA	TRIO	Positive
Ex	ENSG00000215196	rs618524	9337	-118414	0.478305	1803	2337	6.61079e-74	0.512116	0.0272072	0.000261256	-0.118041	0.0322841	3.52243e-07	0.140984	0.0276048	740	0.00026066	0.00464844	LncRNA	BASP1-AS1	Positive
Ex	ENSG00000271892	rs2652666	12410	11981	0.305362	1263	1492	3.37577e-193	0.842042	0.0258789	0.0424952	-0.0472396	0.0232741	4.67868e-06	0.120005	0.0261505	708	0.00331251	0.0345793	LncRNA	AC026790.1	Positive
Ex	BrainMetalnc.59157	rs17626779	202	-3115	0.232296	984	1135	3.14134e-42	-0.439244	0.0316408	2.1099e-06	0.11692	0.0245938	1.32915e-13	-0.226626	0.0304368	708	9.41041e-11	1.23928e-08	LncRNA		Positive
Ex	BrainMetalnc.59200	rs770298	596	-9630	0.392959	1535	1920	3.41766e-28	0.315088	0.0282604	0.000467118	-0.103254	0.0294701	2.61731e-07	0.144013	0.0278897	402	0.000105216	0.00225162	LncRNA	CDH18	Positive
Ex	ENSG00000272130	rs3927440	-80982	-81272	0.133033	601	650	2.14883e-121	0.915583	0.0368973	4.65334e-06	-0.0948201	0.0206572	6.17524e-18	0.321191	0.0369336	323	1.9946e-15	8.53689e-13	LncRNA	AC091946.2	Positive
Ex	BrainMetalnc.59272	rs71616661	82817	6142	0.215923	941	1055	9.40155e-15	-0.266476	0.0341819	0.000146527	0.0928832	0.0244244	2.96444e-07	-0.177819	0.0345948	439	0.000130139	0.00265235	LncRNA	CDH10	Positive
Ex	BrainMetalnc.59273	rs3797171	4555	1014	0.446991	1696	2184	7.13551e-17	-0.23707	0.028204	2.9139e-06	0.148556	0.0316899	2.7068e-08	-0.158762	0.028464	411	1.1125e-05	0.000328378	LncRNA	CDH10	Positive
Ex	BrainMetalnc.59276	rs7716158	6064	-59372	0.160049	719	782	8.36325e-11	0.2511	0.038496	0.00354441	-0.0686551	0.0235206	1.50756e-10	0.251482	0.0390967	451	6.79907e-08	3.88e-06	LncRNA	CDH10	Positive
Ex	BrainMetalnc.59303	rs3811924	88484	24683	0.493655	1813	2412	2.6868e-31	0.322993	0.0273696	7.56626e-12	-0.232033	0.0337244	1.71172e-18	0.245909	0.0278006	460	7.87393e-16	4.49339e-13	LncRNA	CDH9	Positive
Ex	ENSG00000242110	rs3195676	21830	-109	0.462137	1738	2258	0	-1.11857	0.0175143	5.72246e-11	0.136374	0.0207242	9.10933e-14	-0.132431	0.0176654	568	5.1741e-11	7.38172e-09	PCG	AMACR	Positive
Ex	ENSG00000152582	rs10040024	94364	-102403	0.209783	909	1025	5.57611e-119	0.761148	0.0310252	0.000574158	-0.0768749	0.022295	2.0943e-08	0.172618	0.0307003	660	1.38224e-05	0.000381677	PCG	SPEF2	Positive
Ex	ENSG00000152611	rs7702587	13593	-20898	0.436349	1663	2132	2.0452e-23	-0.282824	0.0280737	1.5574e-05	0.135824	0.0313743	2.46054e-06	-0.130877	0.027713	538	0.00132377	0.017433	PCG	CAPSL	Positive
Ex	BrainMetalnc.59486	rs891189	87022	-76833	0.488334	1809	2386	1.02141e-13	0.211315	0.028246	3.86795e-07	-0.173537	0.0340984	6.02813e-09	0.167471	0.0286923	451	2.71868e-06	0.000103431	LncRNA	SLC1A3	Positive
Ex	ENSG00000285967	rs300049	219546	207271	0.439623	1648	2148	0	1.15484	0.0156659	0.00511725	-0.0494831	0.0176593	6.9383e-11	0.103914	0.0158619	428	2.96959e-08	1.95536e-06	LncRNA	NIPBL-DT	Positive
Ex	BrainMetalnc.59495	rs300049	219546	206923	0.439623	1648	2148	0	1.14902	0.0158053	0.00182157	-0.0556104	0.0178164	4.80456e-13	0.116348	0.0160029	428	2.05635e-10	2.26674e-08	LncRNA	NIPBL	Positive
Ex	ENSG00000172262	rs67913249	136443	12003	0.330946	1348	1617	2.62757e-05	-0.126726	0.0300898	2.60429e-05	0.120137	0.0285114	3.08189e-08	-0.164612	0.0296345	293	9.02994e-06	0.000281077	PCG	ZNF131	Positive
Ex	BrainMetalnc.59689	rs10462083	-13791	-16431	0.377405	1473	1844	3.60967e-89	-0.555236	0.0265984	0.000149658	0.104386	0.0274871	6.5173e-06	-0.123769	0.0273902	218	0.00142077	0.0180183	LncRNA	MRPS30	Positive
Ex	ENSG00000164172	rs10471832	25439	11341	0.133033	611	650	1.55133e-19	-0.381183	0.0418041	0.00265405	0.0684467	0.0227526	3.1586e-08	-0.231069	0.0416312	561	1.77197e-05	0.000474003	PCG	MOCS2	Positive
Ex	BrainMetalnc.59820	rs163105	5281	-2236	0.0916905	427	448	2.37314e-69	-0.841767	0.0463065	0.00923221	0.0539542	0.0207085	9.16829e-08	-0.256123	0.0477957	550	5.04256e-05	0.00119901	LncRNA	CCNO	Positive
Ex	BrainMetalnc.59941	rs401207	-28224	-32465	0.280802	1175	1372	1.6669e-05	0.135249	0.031351	0.00029979	-0.0964871	0.0266487	8.7936e-10	0.197647	0.0321156	309	2.71722e-07	1.3682e-05	LncRNA	PDE4D	Positive
Ex	ENSG00000152931	rs1563905	258784	197684	0.120753	545	590	1.96685e-19	0.386219	0.0424805	0.148483	-0.0321174	0.0222209	6.16726e-06	0.187022	0.0412803	304	0.00187485	0.0219845	LncRNA	PART1	Positive
Ex	BrainMetalnc.59943	rs1563905	258784	194010	0.120753	545	590	5.54578e-16	0.347484	0.0426126	0.156242	-0.031613	0.02229	6.84885e-06	0.186676	0.0414086	308	0.00210945	0.0240758	LncRNA	PDE4D	Positive
Ex	ENSG00000035499	rs7730342	127906	35768	0.422636	1644	2065	4.02026e-10	-0.181478	0.0289022	6.21568e-06	0.142208	0.0314004	2.42354e-10	-0.188185	0.0295957	346	8.38543e-08	4.63092e-06	PCG	DEPDC1B	Positive
Ex	BrainMetalnc.59950	rs16878397	20118	17942	0.162096	741	792	3.94483e-80	-0.720715	0.0366251	0.00722833	0.0593091	0.0220611	7.40169e-08	-0.201157	0.0372671	340	2.51657e-05	0.000652784	LncRNA		Positive
Ex	BrainMetalnc.59973	rs2974454	124688	-72818	0.457429	1727	2235	2.28758e-06	0.135008	0.0284975	3.97447e-06	-0.150273	0.0325037	2.49775e-08	0.157565	0.0281779	383	9.56637e-06	0.000292458	LncRNA		Positive
Ex	ENSG00000153015	rs1309569	215474	-34346	0.470937	1770	2301	3.42883e-06	0.133482	0.0286807	9.00692e-05	-0.130997	0.0333967	1.84246e-06	0.133818	0.0279859	385	0.000709348	0.010469	PCG	CWC27	Positive
Ex	BrainMetalnc.60086	rs13182105	59441	58510	0.280393	1176	1370	1.51538e-19	-0.284026	0.03114	0.00128931	0.0870017	0.0270016	3.36692e-06	-0.144794	0.0310859	422	0.00142084	0.0180183	LncRNA	SGTB	Positive
Ex	BrainMetalnc.60182	rs73772446	510842	-99767	0.0693819	328	339	7.24489e-09	0.323343	0.0556945	0.0477545	-0.0423841	0.0214002	2.07041e-09	0.333489	0.0554436	575	1.19048e-06	4.85264e-05	LncRNA		Positive
Ex	ENSG00000249335	rs249234	23	-214553	0.406263	1590	1985	4.29525e-35	-0.354779	0.0282522	2.6556e-06	0.14136	0.0300324	5.86504e-09	-0.162626	0.0278402	486	2.85041e-06	0.000106085	LncRNA	AC093523.1	Positive
Ex	BrainMetalnc.60225	rs171211	13237	9804	0.395825	1575	1934	2.19552e-118	0.65282	0.0266853	0.000160302	-0.102839	0.0272028	4.96539e-07	0.133578	0.0264972	338	0.00016783	0.00320119	LncRNA		Positive
Ex	ENSG00000280187	rs171211	12897	9804	0.395825	1575	1934	1.05632e-111	0.636028	0.0268662	0.000346222	-0.0981305	0.0273872	2.42015e-06	0.126075	0.0266768	337	0.00081559	0.0117335	Other	-	Positive
Ex	ENSG00000131711	rs62363244	106002	3671	0.327671	1316	1601	5.53741e-13	0.213745	0.029479	0.000899277	-0.0934046	0.0280969	2.95453e-07	0.1534	0.0298403	392	0.000115817	0.00241804	PCG	MAP1B	Positive
Ex	ENSG00000113048	rs6831	386	-100577	0.364102	1440	1779	5.27112e-250	0.877499	0.0230095	8.1397e-10	-0.144092	0.0233663	6.28325e-15	0.184598	0.0235222	441	2.77091e-12	5.27089e-10	PCG	MRPS27	Positive
Ex	BrainMetalnc.60321	rs6452817	448645	293811	0.160663	713	785	4.81507e-14	0.287286	0.0378919	0.00834217	-0.0609728	0.0230953	1.6177e-06	0.183535	0.0381734	509	0.000823411	0.0117473	LncRNA	TNPO1	Positive
Ex	ENSG00000164338	rs343109	-99	-17839	0.280802	1191	1372	0.000107687	-0.123493	0.0318367	4.20522e-06	0.126302	0.0273889	5.47029e-12	-0.223864	0.0323166	597	3.26576e-09	2.79549e-07	PCG	UTP15	Positive
Ex	ENSG00000248673	rs10065639	282834	-142452	0.246418	1048	1204	3.20641e-55	0.50243	0.0312936	0.0154849	-0.0594881	0.0245561	6.65003e-06	0.138219	0.0306171	758	0.00504072	0.047416	LncRNA	LINC01331	Positive
Ex	ENSG00000049860	rs1438531896	44552	-37969	0.490176	1782	2395	3.23171e-39	-0.359146	0.0269291	3.53325e-06	0.155906	0.0335438	2.48617e-07	-0.144211	0.0278755	613	0.000152402	0.00296492	PCG	HEXB	Positive
Ex	ENSG00000164220	rs2069685	1998	-5933	0.395825	1528	1934	2.50542e-39	-0.36853	0.0275906	0.000476935	0.100891	0.0288414	2.41371e-06	-0.134826	0.0285253	722	0.0017427	0.0207476	PCG	F2RL2	Positive
Ex	ENSG00000164252	rs72763298	-6258	-42241	0.29431	1225	1438	6.63577e-27	-0.331511	0.0305008	0.000603747	0.0934706	0.0272159	1.2427e-06	-0.151151	0.0310953	751	0.000933265	0.0132045	PCG	AGGF1	Positive
Ex	ENSG00000171530	rs11746827	94676	-82937	0.427139	1636	2087	1.10369e-28	0.313889	0.0278895	1.10053e-07	-0.16453	0.0308963	2.37594e-11	0.190313	0.0283532	708	1.68216e-08	1.15195e-06	PCG	TBCA	Positive
Ex	ENSG00000145692	rs7700970	3692	-16787	0.302088	1238	1476	2.73599e-181	-0.812522	0.0259417	0.00432328	0.0659304	0.023083	2.41193e-07	-0.136669	0.0263887	616	0.000148575	0.00292368	PCG	BHMT	Positive
Ex	ENSG00000286818	rs10056632	5571	1129	0.343021	1380	1676	3.5892e-41	-0.392124	0.0286373	4.09243e-06	0.127406	0.027594	7.1861e-09	-0.168697	0.0290505	644	4.62785e-06	0.000163072	LncRNA	AC008496.3	Positive
Ex	ENSG00000164300	rs35820499	48613	-95780	0.170896	761	835	0.00378403	0.108855	0.0375567	0.000131852	-0.0915404	0.0239065	1.4929e-09	0.223831	0.0368843	770	1.14954e-06	4.80001e-05	PCG	SERINC5	Positive
Ex	ENSG00000247572	rs7728591	36921	-63201	0.21142	934	1033	3.90816e-152	0.863927	0.030582	6.4682e-07	-0.106748	0.021393	2.38593e-13	0.226871	0.030798	618	1.47451e-10	1.80311e-08	LncRNA	CKMT2-AS1	Positive
Ex	ENSG00000248794	rs4704708	-4279	-4548	0.211625	935	1034	2.03097e-88	0.677492	0.0326072	0.00467068	-0.0645952	0.0228129	2.03311e-06	0.156371	0.03284	592	0.0012036	0.0162249	Other	-	Positive
Ex	ENSG00000174695	rs3763063	22788	-2229	0.467458	1744	2284	2.10725e-49	-0.410986	0.0271924	3.52101e-05	0.133447	0.0321983	1.97133e-06	-0.128958	0.0270472	578	0.00113943	0.0156056	PCG	TMEM167A	Positive
Ex	BrainMetalnc.60686	rs10057748	106478	-4249	0.18686	839	913	0.0216479	0.0854005	0.0371635	0.00610355	-0.067103	0.0244494	1.48234e-06	0.174486	0.0361588	312	0.000462489	0.00736101	LncRNA	RASA1	Positive
Ex	ENSG00000271904	rs190438	297193	232388	0.283463	1181	1385	1.30725e-06	0.151819	0.0312979	0.00340168	-0.0772796	0.0263593	1.0551e-05	0.139186	0.0315271	254	0.00267995	0.0288558	LncRNA	AC091826.2	Positive
Ex	BrainMetalnc.60837	rs10037940	41650	27946	0.495293	1805	2420	1.73169e-12	-0.197235	0.0278132	2.66618e-06	0.159844	0.0339653	6.7062e-08	-0.147523	0.0272405	394	2.64224e-05	0.000675153	LncRNA	SLF1	Positive
Ex	BrainMetalnc.60887	rs1043381	-21773	-24521	0.264634	1128	1293	7.26773e-64	0.529145	0.0304491	9.54441e-09	-0.142019	0.0246618	9.42671e-16	0.246795	0.0305122	546	5.14699e-13	1.10145e-10	LncRNA	ELL2	Positive
Ex	ENSG00000058729	rs31004	-8491	-30871	0.334016	1348	1632	1.16023e-75	0.529744	0.0277834	2.99532e-07	-0.139326	0.0271163	9.53772e-12	0.194899	0.0284667	480	4.57811e-09	3.73225e-07	PCG	RIOK2	Positive
Ex	ENSG00000286953	rs12652659	70393	-12890	0.196684	860	961	3.03443e-72	0.618159	0.033253	0.000966613	-0.0770345	0.0233149	2.36375e-07	0.167726	0.0323615	412	9.73864e-05	0.00211045	LncRNA	AC122697.1	Positive
Ex	ENSG00000174132	rs794524	-226443	-277810	0.198526	886	970	5.69187e-07	-0.181034	0.0361002	0.00207321	0.0769093	0.0249475	7.01955e-07	-0.179849	0.0361587	268	0.000188124	0.00353921	PCG	FAM174A	Positive
Ex	BrainMetalnc.61191	rs17132339	14690	8530	0.0920999	429	450	2.51729e-10	0.310857	0.0489337	0.0368877	-0.0458212	0.0219434	8.33486e-07	0.234449	0.0474579	563	0.000469253	0.00736101	LncRNA	SLC25A46	Positive
Ex	ENSG00000153037	rs580237	-2853	-40036	0.319075	1323	1559	2.86353e-20	-0.282009	0.0303042	1.8651e-05	0.116099	0.0270694	2.67994e-10	-0.194748	0.0307037	580	1.55436e-07	8.31585e-06	PCG	SRP19	Positive
Ex	ENSG00000164219	rs2053697	12641	-36602	0.496725	1848	2427	3.74047e-11	-0.190852	0.0287235	2.09561e-06	0.166551	0.0350233	4.35712e-10	-0.179629	0.0286659	619	2.69706e-07	1.3682e-05	PCG	PGGT1B	Positive
Ex	BrainMetalnc.61480	rs1973174	40314	36300	0.260336	1104	1272	3.78983e-20	-0.29498	0.0318036	0.000286436	0.0932361	0.0256669	2.26706e-07	-0.167141	0.0321996	612	0.000138744	0.00279447	LncRNA		Positive
Ex	ENSG00000173926	rs246887	452343	289499	0.419566	1615	2050	0.00500887	0.0806801	0.0287218	0.000532184	-0.108366	0.0312418	5.72109e-06	0.129695	0.0285263	553	0.00316376	0.033642	PCG	MARCHF3	Positive
Ex	ENSG00000131435	rs932019	5981	-9777	0.362874	1466	1773	2.07184e-150	0.72874	0.0259681	1.035e-11	-0.174848	0.0255827	1.05022e-16	0.220246	0.0263491	305	3.20318e-14	7.83407e-12	PCG	PDLIM4	Positive
Ex	ENSG00000233006	rs2516788	68587	10170	0.39562	1552	1933	7.15536e-26	-0.302654	0.0284469	1.28793e-06	0.145533	0.0299836	1.76129e-09	-0.173016	0.0286382	363	6.39349e-07	2.73641e-05	LncRNA	MIR3936HG	Positive
Ex	ENSG00000197536	rs13164856	66876	-11190	0.278142	1177	1359	7.81126e-10	-0.194801	0.0315556	5.49755e-06	0.11981	0.0263032	1.7374e-14	-0.242865	0.0314757	432	7.50557e-12	1.16814e-09	LncRNA	IRF1	Positive
Ex	BrainMetalnc.61694	rs56076449	39569	19782	0.265862	1117	1299	1.54692e-28	0.348213	0.0310257	5.08374e-05	-0.104687	0.0257913	1.24674e-11	0.209314	0.030748	650	8.10383e-09	5.78073e-07	LncRNA	HSPA4	Positive
Ex	ENSG00000164615	rs79706599	3257	-10405	0.0937372	431	458	6.24727e-254	1.46723	0.038096	0.000630459	-0.060153	0.0175752	3.21744e-07	0.186654	0.036424	608	0.000195621	0.00364024	PCG	CAMLG	Positive
Ex	ENSG00000120708	rs2237066	2926	-31904	0.486697	1798	2378	7.83084e-15	-0.219882	0.0281199	5.36366e-05	0.132366	0.0327122	1.05065e-06	-0.134195	0.0274183	535	0.0005621	0.00859209	PCG	TGFBI	Positive
Ex	BrainMetalnc.61841	rs71589381	38219	-31839	0.0677446	320	331	1.35521e-08	0.321735	0.0564609	0.0172649	-0.0508943	0.0213604	1.52246e-08	0.320173	0.0563861	331	5.03934e-06	0.000172547	LncRNA		Positive
Ex	ENSG00000120725	rs10065532	9920	-336913	0.361236	1426	1765	5.71769e-55	0.444831	0.0277747	0.00241101	-0.0829317	0.0273029	1.40242e-06	0.133792	0.0276619	336	0.000471212	0.00736101	PCG	SIL1	Positive
Ex	ENSG00000243056	rs28493133	-44032	-45946	0.470119	1734	2297	0.00207828	-0.0862097	0.0279709	0.00189055	0.104776	0.0336867	3.2943e-06	-0.127755	0.0274013	326	0.00107394	0.0148273	PCG	EIF4EBP3	Positive
Ex	ENSG00000204961	rs251368	13670	6771	0.495702	1812	2422	0.0129298	-0.0700582	0.0281638	4.42046e-06	0.156883	0.0340978	1.18347e-09	-0.17114	0.0280271	405	4.79307e-07	2.21777e-05	PCG	PCDHA9	Positive
Ex	ENSG00000239389	rs369636	-31858	-33910	0.36533	1464	1785	3.38248e-180	0.784258	0.0251296	6.50045e-05	-0.0995559	0.0248839	5.30415e-08	0.138276	0.025335	411	2.18001e-05	0.00057418	PCG	PCDHA13	Positive
Ex	ENSG00000287527	rs248516	1390	-2022	0.492018	1806	2404	1.26392e-25	-0.293919	0.027771	1.15116e-05	0.150451	0.0342263	1.4985e-06	-0.135674	0.0281285	663	0.000993504	0.0138283	LncRNA	AC005753.3	Positive
Ex	BrainMetalnc.62058	rs6881942	35124	-1428	0.440033	1660	2150	4.46457e-11	0.185593	0.0280442	5.28545e-06	-0.144064	0.0315702	9.95706e-09	0.159884	0.0277991	686	6.83054e-06	0.000220639	LncRNA	NDFIP1	Positive
Ex	ENSG00000145819	rs154787	456359	-2275	0.488743	1793	2388	5.6703e-36	0.348321	0.0273683	5.06397e-05	-0.133024	0.0327652	2.6376e-06	0.128965	0.0273909	783	0.00206524	0.0237294	PCG	ARHGAP26	Positive
Ex	ENSG00000113580	rs10482682	21901	-135680	0.379861	1490	1856	4.05592e-19	0.257228	0.0285492	0.000210989	-0.109071	0.0293907	1.50102e-07	0.154949	0.0294139	594	8.91606e-05	0.00195696	PCG	NR3C1	Positive
Ex	BrainMetalnc.62110	rs13178033	17007	-39885	0.332378	1344	1624	1.39934e-09	-0.180932	0.0297634	0.00225676	0.0860519	0.0281453	3.80472e-06	-0.136033	0.0293656	382	0.0014534	0.0182958	LncRNA		Positive
Ex	ENSG00000204909	rs7716578	43275	24626	0.253172	1083	1237	2.78539e-142	0.780014	0.028704	2.16892e-05	-0.0947541	0.0222686	7.18959e-11	0.183259	0.0279964	460	3.30721e-08	2.09702e-06	PCG	SPINK9	Positive
Ex	ENSG00000169247	rs3763022	77876	-61648	0.22411	981	1095	9.72842e-47	-0.485795	0.0331226	0.00906639	0.0630728	0.0241507	6.94266e-06	-0.152217	0.0337867	595	0.00413088	0.040879	PCG	SH3TC2	Positive
Ex	BrainMetalnc.62274	rs6875902	34923	31532	0.204052	902	997	1.61775e-17	-0.301712	0.0351521	0.0173857	0.0580546	0.0243919	5.031e-06	-0.162975	0.0356328	554	0.00278717	0.0298228	LncRNA	SH3TC2	Positive
Ex	ENSG00000197043	rs3213802	38091	-18982	0.461727	1736	2256	1.66278e-34	-0.344586	0.0276931	8.42752e-07	0.157415	0.0318785	5.57992e-09	-0.15868	0.0271254	696	3.88362e-06	0.000141463	PCG	ANXA6	Positive
Ex	BrainMetalnc.62389	rs72798307	-11732	-14481	0.160049	715	782	9.69169e-66	0.643398	0.0364437	0.0777675	-0.0397839	0.0225464	9.34432e-06	0.157553	0.0354753	560	0.00523282	0.048954	LncRNA	SLC36A1	Positive
Ex	ENSG00000055163	rs11744003	113904	-15548	0.429185	1654	2097	1.83175e-10	-0.183815	0.0287116	1.55724e-05	0.140548	0.0324655	2.17587e-06	-0.139155	0.0293096	564	0.00122719	0.0163918	PCG	CYFIP2	Positive
Ex	BrainMetalnc.62691	rs72832005	371583	-46530	0.0857552	406	419	0.00756732	0.138309	0.0517427	0.0478003	-0.043068	0.02175	4.15473e-08	0.293291	0.0533096	975	4.05086e-05	0.00100508	LncRNA	TENM2	Positive
Ex	ENSG00000113643	rs147639337	-12284	-45115	0.0906672	429	443	0.027276	-0.111694	0.0505661	0.00348017	0.0645423	0.0220683	4.17468e-08	-0.279624	0.0508332	901	3.76139e-05	0.000946984	PCG	RARS1	Positive
Ex	ENSG00000188573	rs10058869	5323	3994	0.178469	798	872	1.38375e-111	0.797364	0.0337011	0.00087679	-0.0735311	0.0220717	5.86382e-12	0.229145	0.0331269	876	5.1367e-09	3.99729e-07	PCG	FBLL1	Positive
Ex	BrainMetalnc.62937	rs57351364	-4809	-6030	0.221858	971	1084	2.95214e-210	-0.973699	0.0284288	0.000736147	0.0713053	0.021096	2.10222e-06	-0.134788	0.0283478	798	0.00167757	0.0202254	LncRNA	THOC3	Positive
Ex	ENSG00000051596	rs73803460	44507	-72300	0.181334	816	886	5.66727e-98	0.753608	0.0342605	0.0109971	-0.0572973	0.022516	9.80953e-08	0.181654	0.0339774	808	7.9261e-05	0.00176227	PCG	THOC3	Positive
Ex	BrainMetalnc.62944	rs149328021	34637	13652	0.0976259	448	477	5.79983e-45	-0.654986	0.0456055	0.00332018	0.0621679	0.0211504	3.18818e-13	-0.325654	0.0444471	706	2.25085e-10	2.26674e-08	LncRNA	FAM153B	Positive
Ex	BrainMetalnc.62948	rs12520581	-31066	-85371	0.444535	1670	2172	2.09636e-151	0.690458	0.0245099	1.86229e-05	-0.117256	0.027337	1.68659e-08	0.135962	0.0240196	711	1.19917e-05	0.000347961	LncRNA	AC139491.7	Positive
Ex	BrainMetalnc.63035	rs2544814	-14417	-75923	0.495907	1833	2423	1.65318e-11	-0.193022	0.0285287	0.000526619	0.119509	0.0344262	3.02233e-06	-0.134422	0.0287212	728	0.00220026	0.024946	LncRNA	FAM193B	Positive
Ex	ENSG00000027847	rs2133708	77530	67332	0.393778	1529	1924	7.23264e-32	-0.333283	0.0279661	7.40944e-05	0.118054	0.02974	3.66752e-07	-0.140871	0.0276246	724	0.000265529	0.00468644	PCG	B4GALT7	Positive
Ex	BrainMetalnc.63145	rs4797	4158	2492	0.46009	1720	2248	2.81413e-07	-0.145059	0.0281673	1.93338e-05	0.141936	0.0331556	6.97291e-08	-0.153893	0.0284537	1088	7.58653e-05	0.00170897	LncRNA	SQSTM1	Positive
Ex	ENSG00000050748	rs731918	56193	-2763	0.471347	1765	2303	1.3758e-29	0.319479	0.0279109	0.00022303	-0.1206	0.0326217	1.32229e-06	0.135171	0.0278791	1042	0.00137782	0.0177356	PCG	MAPK9	Positive
Ex	ENSG00000248275	rs2545073	22091	10953	0.277937	1172	1358	0	-1.10104	0.0229128	0.00114926	0.0632011	0.0194164	1.28012e-07	-0.119862	0.0226267	533	6.82302e-05	0.00160014	LncRNA	TRIM52-AS1	Positive
Ex	BrainMetalnc.63222	rs2545073	22048	-9480	0.277937	1172	1358	9.52846e-269	-0.992549	0.0248561	0.00548006	0.0585524	0.0210631	6.71558e-07	-0.1223	0.0245457	533	0.000357941	0.00606727	LncRNA		Positive
Ex	BrainMetalnc.44775	rs6053728	530	-38977	0.278346	1164	1360	3.37594e-54	0.4769	0.0300065	0.000590253	-0.0873944	0.0254011	8.81465e-10	0.185809	0.0301941	1171	1.0322e-06	3.78771e-05	LncRNA	AL121758.1	Positive
Ex	ENSG00000234684	rs6041508	10592	-42738	0.445149	1688	2175	3.23392e-09	0.168733	0.0284006	4.17834e-05	-0.134148	0.0326802	1.97754e-06	0.135445	0.0284115	1396	0.00276064	0.0402431	LncRNA	SDCBP2-AS1	Positive
Ex	ENSG00000101307	rs4813322	351778	293102	0.360008	1449	1759	0	1.19104	0.0175734	3.1472e-08	-0.094947	0.0171044	1.43969e-17	0.147529	0.0171609	1359	1.95654e-14	3.30265e-12	PCG	SIRPB1	Positive
Ex	ENSG00000125780	rs6137427	-49107	-94185	0.472984	1759	2311	4.35067e-49	0.408805	0.027142	9.72223e-05	-0.123962	0.0317535	7.64755e-09	0.157754	0.0272156	998	7.63226e-06	0.000257665	PCG	TGM3	Positive
Ex	ENSG00000198171	rs6084320	73568	59233	0.484445	1805	2367	0.000542228	0.099507	0.0287295	8.98474e-05	-0.130523	0.0332706	8.2005e-08	0.15244	0.0283395	951	7.79868e-05	0.00212325	PCG	DDRGK1	Positive
Ex	ENSG00000125877	rs58439054	-18575	-33577	0.102947	480	503	1.47649e-159	-1.18299	0.0407284	0.00227877	0.0591004	0.0193487	6.67575e-09	-0.235542	0.0404744	949	6.33529e-06	0.000222791	PCG	ITPA	Positive
Ex	ENSG00000125827	rs4813847	8981	-32712	0.400532	1568	1957	7.66289e-62	0.470096	0.0275301	0.00036361	-0.105438	0.0295329	3.58129e-07	0.14168	0.0277585	658	0.000235649	0.00523388	PCG	TMX4	Positive
Ex	ENSG00000125871	rs4814686	69799	47695	0.418952	1604	2047	7.92268e-08	0.152946	0.0284005	0.000208831	-0.115836	0.0311914	4.36769e-06	0.130997	0.0284561	729	0.00318405	0.0441467	PCG	MGME1	Positive
Ex	ENSG00000149474	rs2424109	86065	34906	0.14695	653	718	1.22422e-13	-0.290998	0.0390241	0.00432837	0.0665927	0.0233179	2.11764e-06	-0.179301	0.0377214	779	0.00164964	0.0272999	PCG	KAT14	Positive
Ex	ENSG00000232388	rs765100334	-83881	-86097	0.129144	590	631	3.3418e-60	-0.674864	0.0401045	0.000136165	0.082376	0.0215581	2.77589e-16	-0.336081	0.0407864	721	2.00142e-13	1.6892e-11	PCG	SMIM26	Positive
Ex	ENSG00000175170	rs6138716	144916	39075	0.290626	1213	1420	1.67038e-45	0.432142	0.0298951	7.72456e-08	-0.141299	0.0262152	1.42418e-16	0.245886	0.0295475	238	3.38955e-14	4.76796e-12	LncRNA	FAM182B	Positive
Ex	ENSG00000125804	rs6051086	22113	-79594	0.393369	1540	1922	7.87082e-225	0.842335	0.0236014	0.000118916	-0.0935657	0.0242738	9.51508e-11	0.149895	0.02305	200	1.90302e-08	8.92303e-07	LncRNA	FAM182A	Positive
Ex	ENSG00000214078	rs2277862	-61171	-99899	0.147155	672	719	5.441e-77	-0.733437	0.0381003	0.051308	0.0429772	0.0220412	4.03703e-07	-0.189663	0.0373272	235	9.48702e-05	0.0025022	PCG	CPNE1	Positive
Ex	ENSG00000101363	rs1043432	27302	-320	0.456201	1722	2229	1.33578e-24	0.290471	0.0280639	2.92304e-05	-0.134167	0.0320414	2.97966e-07	0.141108	0.0274578	450	0.000134085	0.00342932	PCG	MANBAL	Positive
Ex	BrainMetalnc.45917	rs788348	73404	-556	0.169464	745	828	0	1.30267	0.0264289	0.000245816	-0.0620894	0.0169088	3.94287e-10	0.157856	0.0251279	546	2.15281e-07	8.65224e-06	LncRNA		Positive
Ex	ENSG00000196756	rs788348	15189	-578	0.169464	745	828	0	1.23614	0.0272097	1.60484e-12	-0.123637	0.0174084	8.54182e-30	0.297246	0.0258702	520	4.44175e-27	3.74884e-24	LncRNA	SNHG17	Positive
Ex	ENSG00000101076	rs3746575	73756	-5140	0.391527	1557	1913	8.26236e-143	-0.70837	0.0260119	5.57319e-05	0.110956	0.0274825	1.77449e-06	-0.126318	0.0263753	714	0.00126698	0.0232464	PCG	HNF4A	Positive
Ex	BrainMetalnc.46110	rs6031713	16055	-66610	0.169668	755	829	1.81281e-08	-0.210314	0.0372376	5.12032e-06	0.107792	0.0235868	1.01671e-14	-0.280228	0.0359927	658	6.68994e-12	4.48225e-10	LncRNA		Positive
Ex	ENSG00000283440	rs6130661	15843	8796	0.195456	855	955	3.95873e-87	-0.676331	0.0328172	0.000294898	0.0811953	0.0223988	1.85145e-08	-0.179777	0.0318516	646	1.19604e-05	0.000388252	LncRNA	LINC01260	Positive
Ex	ENSG00000166913	rs7265519	927	-21903	0.283054	1170	1383	4.7789e-81	-0.567767	0.0286724	6.5958e-10	0.153945	0.0248284	2.17755e-16	-0.233576	0.0282444	607	1.32177e-13	1.29275e-11	PCG	YWHAB	Positive
Ex	BrainMetalnc.46133	rs6065772	-61290	-76900	0.160458	711	784	3.47432e-53	0.573255	0.0364403	0.00670581	-0.06058	0.0223259	1.11875e-06	0.175576	0.0359649	572	0.000639923	0.0122749	LncRNA		Positive
Ex	ENSG00000158445	rs6095492	64273	-126630	0.338723	1374	1655	1.28312e-10	0.191851	0.0297113	2.72829e-07	-0.150121	0.029117	1.18221e-11	0.202587	0.0297259	626	7.40065e-09	3.90384e-07	PCG	KCNB1	Positive
Ex	BrainMetalnc.46275	rs6012670	133560	-28967	0.117479	547	574	1.47188e-05	-0.193895	0.0446591	0.00888291	0.0593829	0.022677	2.94323e-07	-0.222296	0.0432362	612	0.000180126	0.00410881	LncRNA	KCNB1	Positive
Ex	BrainMetalnc.46362	rs59619670	8795	-448845	0.308637	1269	1508	9.64138e-182	0.81206	0.0258884	0.000451358	-0.0829319	0.023608	6.30084e-11	0.172082	0.0262088	925	5.82828e-08	2.45953e-06	LncRNA	ATP9A	Positive
Ex	ENSG00000019186	rs2248137	19758	-782	0.418747	1627	2046	3.41426e-293	-0.937908	0.0221996	1.68177e-07	0.129777	0.024735	1.47121e-16	-0.186767	0.022454	937	1.37853e-13	1.29275e-11	PCG	CYP24A1	Positive
Ex	ENSG00000022277	rs28620942	57676	6812	0.442489	1655	2162	3.52335e-22	0.268579	0.027465	2.33565e-08	-0.180658	0.0322397	3.73365e-11	0.18905	0.0284511	1032	3.85313e-08	1.7116e-06	PCG	RTF2	Positive
Ex	BrainMetalnc.46483	rs6026453	10112	9281	0.244781	1043	1196	2.86256e-64	-0.544018	0.0311973	0.0154447	0.0591585	0.0244105	3.20351e-06	-0.148359	0.031781	996	0.0031907	0.0441467	LncRNA	STX16-NPEPL1	Positive
Ex	ENSG00000101160	rs151343	22557	5	0.398485	1541	1947	0.000116195	0.110432	0.0286071	0.000717941	-0.104065	0.0307252	3.37588e-06	0.135736	0.0291448	943	0.00318345	0.0441467	PCG	CTSZ	Positive
Ex	BrainMetalnc.46572	rs2427097	3618	-4028	0.452722	1734	2212	3.01728e-76	0.519617	0.0271373	9.43477e-05	-0.121713	0.0311191	3.25257e-10	0.175308	0.0277718	1109	3.6071e-07	1.38382e-05	LncRNA	CDH4	Positive
Ex	ENSG00000277270	rs2427134	57847	53085	0.452108	1721	2209	3.77871e-45	0.399216	0.0277345	0.000323966	-0.114365	0.0317638	6.31321e-08	0.150149	0.0276695	1110	7.00766e-05	0.00197149	LncRNA	AL160412.1	Positive
Ex	ENSG00000273619	rs1741640	-28945	-29612	0.23946	1032	1170	1.12992e-68	-0.569976	0.0315238	0.00230346	0.0740678	0.0242746	2.60083e-07	-0.16371	0.0316969	1274	0.000331346	0.00682087	LncRNA	RPS21	Positive
Ex	ENSG00000231133	rs8118853	14228	2830	0.241711	1046	1181	1.12362e-81	-0.619231	0.0311384	1.18449e-05	0.106535	0.0242705	2.02057e-07	-0.160601	0.0308113	1212	0.000244893	0.00529973	LncRNA	HAR1B	Positive
Ex	BrainMetalnc.46644	rs3746746	10382	1129	0.259926	1115	1270	5.64385e-144	-0.786401	0.028742	2.53507e-05	0.0987444	0.0234005	1.29237e-06	-0.13872	0.0285838	1205	0.0015573	0.0263097	LncRNA		Positive
Ex	ENSG00000225978	rs3746746	1128	-626	0.259926	1115	1270	9.21785e-270	-1.01918	0.0254614	1.31425e-08	0.118235	0.0207296	8.31444e-12	-0.173871	0.0253214	1194	9.92744e-09	4.92868e-07	LncRNA	HAR1A	Positive
Ex	ENSG00000197114	rs1151624	30504	2401	0.239664	1028	1171	2.33698e-23	-0.328082	0.0326103	0.00945419	0.0647547	0.0249322	2.5597e-06	-0.161134	0.0341786	936	0.00239588	0.0367659	PCG	ZGPAT	Positive
Ex	ENSG00000149656	rs62218006	33985	15744	0.0628326	295	307	7.46941e-48	0.822234	0.0553502	0.00363546	-0.0591063	0.0203045	1.84108e-15	0.442457	0.0552778	555	1.0218e-12	7.83997e-11	LncRNA	LINC00266-1	Positive
Ex	BrainMetalnc.46729	rs62218006	33979	10983	0.0628326	295	307	1.37853e-104	1.19887	0.0525488	0.000201084	-0.0717737	0.0192769	1.24395e-14	0.407219	0.0524801	555	6.90394e-12	4.48225e-10	LncRNA		Positive
Ex	ENSG00000231660	rs6784175	156	-452	0.35878	1447	1753	6.63451e-67	0.502323	0.0281812	0.00170761	-0.0880565	0.0280403	1.55637e-06	0.138273	0.0287128	750	0.00116728	0.015817	Other	-	Positive
Ex	BrainMetalnc.49459	rs2729044	760	-46123	0.443512	1677	2167	5.02777e-139	0.648652	0.0241907	2.35679e-28	-0.306042	0.0273638	8.24933e-51	0.368189	0.0239925	1691	1.39496e-47	1.40821e-44	LncRNA	CNTN4	Positive
Ex	ENSG00000144455	rs4685744	661039	-105420	0.48772	1787	2383	2.81085e-24	-0.278614	0.0271137	3.2742e-16	0.274144	0.0333521	7.14277e-26	-0.287139	0.0269882	1893	1.35213e-22	3.89992e-20	PCG	SUMF1	Positive
Ex	BrainMetalnc.49500	rs9311399	3542	-4494	0.381907	1499	1866	1.45743e-32	0.339361	0.0281442	2.0587e-06	-0.136433	0.0286682	1.90688e-12	0.197702	0.0279328	1151	2.19482e-09	1.08081e-07	LncRNA	ITPR1	Positive
Ex	ENSG00000156990	rs57223920	5576	-1177	0.0687679	330	336	8.27968e-149	-1.39197	0.0499111	0.00401658	0.0547691	0.0190197	8.13563e-07	-0.24055	0.0486458	921	0.000749291	0.0109625	PCG	RPUSD3	Positive
Ex	BrainMetalnc.49715	rs56125067	2608	1600	0.167622	745	819	9.77033e-131	0.867294	0.0335058	0.00478449	-0.0597561	0.0211617	5.25341e-10	0.211418	0.0338994	940	4.9382e-07	1.73202e-05	LncRNA	AC018809.3	Positive
Ex	BrainMetalnc.49742	rs775017	1902	-551	0.430413	1652	2103	9.97181e-14	0.212811	0.0284337	4.0308e-05	-0.130107	0.0316313	1.24153e-08	0.159958	0.0279966	846	1.05033e-05	0.000275405	LncRNA	ATP2B2	Positive
Ex	BrainMetalnc.49819	rs60602014	1358	-2336	0.439009	1693	2145	3.02914e-33	-0.341695	0.0280206	3.43183e-12	0.221496	0.0316685	1.53572e-18	-0.254231	0.0287009	736	1.13029e-15	1.75543e-13	LncRNA	IQSEC1	Positive
Ex	BrainMetalnc.49822	rs458898	-980	-2389	0.237208	1011	1159	0.000701962	-0.111932	0.0329877	0.000597017	0.0888815	0.0258567	4.40036e-08	-0.184732	0.0336401	741	3.26067e-05	0.000783725	LncRNA	IQSEC1	Positive
Ex	ENSG00000154764	rs13079464	-35316	-99129	0.437372	1681	2137	2.27196e-11	0.193018	0.0287279	0.000299921	-0.116379	0.0321437	1.09574e-06	0.14189	0.02904	990	0.00108478	0.0150012	PCG	WNT7A	Positive
Ex	ENSG00000163528	rs2731316	654	-12139	0.462341	1726	2259	2.29045e-38	0.359019	0.0272411	2.09009e-07	-0.163441	0.0313945	1.73233e-12	0.190995	0.0269335	855	1.48114e-09	7.66615e-08	PCG	CHCHD4	Positive
Ex	ENSG00000225733	rs6442487	15745	-12332	0.261564	1119	1278	8.4814e-18	0.277697	0.0320694	5.55901e-07	-0.129378	0.0257758	1.29691e-12	0.226833	0.0318044	686	8.89683e-10	5.1322e-08	LncRNA	FGD5-AS1	Positive
Ex	BrainMetalnc.49883	rs6442487	632	-12350	0.261564	1119	1278	2.68797e-18	0.281785	0.0320454	3.66955e-07	-0.131342	0.0257565	5.91825e-13	0.230141	0.0317806	687	4.06584e-10	2.48756e-08	LncRNA	NR2C2	Positive
Ex	ENSG00000206562	rs2305614	94536	48267	0.406058	1587	1984	5.03348e-06	0.132839	0.0290447	0.000265913	-0.113955	0.0312053	1.0946e-06	0.142117	0.0290852	779	0.000852691	0.0121238	PCG	METTL6	Positive
Ex	ENSG00000286689	rs11128772	-6811	-8061	0.487925	1789	2384	3.27399e-170	0.726835	0.0240905	1.54456e-09	-0.17794	0.0293488	4.43508e-11	0.160429	0.0242381	663	2.94046e-08	1.34927e-06	LncRNA	AC090946.1	Positive
Ex	BrainMetalnc.49905	rs12496802	8848	3725	0.488334	1801	2386	4.49125e-38	-0.361624	0.0275528	0.000410499	0.117784	0.0332898	3.45556e-06	-0.127536	0.0274128	670	0.00231523	0.0261142	LncRNA		Positive
Ex	BrainMetalnc.49951	rs9851736	2134	-2701	0.421203	1611	2058	9.49311e-09	-0.163364	0.028364	0.000302721	0.113773	0.0314448	9.18061e-06	-0.12725	0.0286274	355	0.00325912	0.0324146	LncRNA	SATB1	Positive
Ex	ENSG00000091317	rs342756	-20617	-42157	0.29165	1214	1425	3.72204e-05	0.128654	0.0311382	0.000505085	-0.0950068	0.0272795	1.83245e-06	0.148463	0.0310416	786	0.0014403	0.0186409	PCG	CMTM6	Positive
Ex	BrainMetalnc.50519	rs2685080	70707	-70954	0.151453	690	740	1.02018e-93	0.789032	0.0367688	6.13891e-05	-0.0861881	0.0214696	5.66905e-12	0.248305	0.0358716	528	2.99326e-09	1.4389e-07	LncRNA		Positive
Ex	BrainMetalnc.50523	rs138757230	-10317	-12917	0.0892345	423	436	2.2795e-08	-0.28359	0.0505702	0.0351446	0.0460444	0.0218441	1.53434e-07	-0.265815	0.0504988	453	6.95054e-05	0.00145585	LncRNA	CTDSPL	Positive
Ex	BrainMetalnc.50602	rs2649747	-202046	-208420	0.459271	1751	2244	3.0885e-05	-0.121301	0.0290562	0.00013189	0.129435	0.0338036	3.82825e-06	-0.13556	0.0292718	465	0.00178014	0.0220497	LncRNA	MOBP	Positive
Ex	ENSG00000281160	rs9813346	7858	6457	0.384568	1519	1879	4.08934e-43	-0.396883	0.0282698	8.47188e-06	0.129929	0.0291163	1.12326e-06	-0.138127	0.0282984	455	0.000511085	0.00785792	LncRNA	AC018358.1	Positive
Ex	ENSG00000232354	rs386212	15098	-11695	0.439419	1688	2147	3.42965e-16	-0.234834	0.0285896	3.23269e-06	0.150838	0.032325	5.63986e-08	-0.156372	0.0287086	436	2.45898e-05	0.000598154	LncRNA	VIPR1-AS1	Positive
Ex	BrainMetalnc.50690	rs72871336	-472575	-477723	0.0685632	321	335	0.0112915	-0.142316	0.0561299	0.139286	0.0316799	0.0214207	1.11179e-05	-0.24477	0.0555871	415	0.00461393	0.0435305	LncRNA	CCDC13	Positive
Ex	ENSG00000244607	rs62246641	112192	44744	0.191772	840	937	8.88271e-33	0.421666	0.0348453	0.010868	-0.0601496	0.0235986	5.02305e-07	0.180125	0.0357463	441	0.000221517	0.00399323	PCG	CCDC13	Positive
Ex	ENSG00000181061	rs73075301	8250	-13332	0.221858	960	1084	1.97494e-206	-0.956217	0.0282327	0.000416821	0.0739281	0.0209187	9.91435e-07	-0.140911	0.028723	435	0.000431274	0.00680267	PCG	HIGD1A	Positive
Ex	ENSG00000144792	rs7623875	-3978	-25449	0.281007	1180	1373	2.11662e-34	0.381776	0.0307325	4.17995e-05	-0.10664	0.0259793	2.86627e-07	0.157001	0.0305066	475	0.000136148	0.00259323	PCG	ZNF660	Positive
Ex	ENSG00000196653	rs1004631	-161156	-172344	0.264429	1113	1292	3.68714e-165	0.821167	0.0277046	0.134565	-0.0343735	0.022964	1.1241e-05	0.118664	0.0269632	471	0.00529452	0.0485893	PCG	ZNF502	Positive
Ex	ENSG00000163827	rs17078953	44878	-19836	0.372493	1482	1820	1.13447e-235	-0.86944	0.0236587	9.63136e-08	0.128646	0.0240474	2.4166e-12	-0.167198	0.0237355	446	1.0778e-09	6.04469e-08	PCG	LRRC2	Positive
Ex	ENSG00000178038	rs7373358	17723	-6986	0.244781	1067	1196	2.86252e-107	-0.70835	0.0306104	2.32351e-05	0.10246	0.024168	4.61585e-07	-0.153141	0.030293	408	0.000188327	0.00345665	PCG	ALS2CL	Positive
Ex	ENSG00000181585	rs77829267	6505	-9853	0.0638559	302	312	5.4627e-05	-0.235006	0.0581403	0.0112495	0.0543125	0.02141	2.45882e-07	-0.310689	0.0600312	392	9.63856e-05	0.00194603	PCG	TMIE	Positive
Ex	ENSG00000114650	rs4858890	-49715	-113160	0.430004	1622	2101	1.89262e-121	0.624655	0.0251667	0.000192746	-0.103154	0.0276253	2.3433e-08	0.140631	0.0250993	262	6.13945e-06	0.000167507	PCG	SCAP	Positive
Ex	ENSG00000178467	rs56023037	-615176	-632248	0.225133	980	1100	6.02047e-30	-0.384923	0.0334086	0.0034292	0.0716285	0.0244527	1.93739e-05	-0.143879	0.0336132	154	0.00298359	0.030734	PCG	P4HTM	Positive
Ex	ENSG00000285416	rs11928552	-294771	-296992	0.35919	1440	1755	2.3462e-31	0.341801	0.0289338	0.000859952	-0.0962847	0.0288547	2.5889e-05	0.124416	0.0295176	153	0.00396101	0.0382413	Other	-	Positive
Ex	ENSG00000178057	rs6442112	-741858	-744894	0.283054	1183	1383	0.0113038	-0.0798465	0.0314965	0.017983	0.0641909	0.0271126	3.28543e-05	-0.12975	0.0311861	152	0.00499386	0.0464636	PCG	NDUFAF3	Positive
Ex	BrainMetalnc.50949	rs11720264	390054	380380	0.405444	1590	1981	8.67209e-06	-0.130025	0.0291707	0.000730837	0.106935	0.0316186	3.35444e-06	-0.136263	0.0292497	159	0.000533356	0.00809659	LncRNA		Positive
Ex	ENSG00000177352	rs4536858	-6887	-10683	0.373721	1463	1826	4.55778e-11	0.189505	0.0286487	8.43305e-05	-0.117441	0.0298195	4.38813e-07	0.149203	0.0294573	150	6.58219e-05	0.00141377	PCG	CCDC71	Positive
Ex	ENSG00000233276	rs11707940	-30837	-32014	0.194433	854	950	2.85746e-15	-0.281392	0.0354017	0.00937096	0.0622177	0.0239273	9.82486e-06	-0.153975	0.0347549	164	0.00161128	0.0201406	PCG	GPX1	Positive
Ex	ENSG00000145029	rs62259536	-512602	-519595	0.236799	1015	1157	3.65777e-32	0.38618	0.0322424	8.80815e-06	-0.110678	0.0248492	8.50173e-12	0.228449	0.0332855	176	1.4963e-09	7.66615e-08	PCG	NICN1	Positive
Ex	ENSG00000226913	rs1352890	65417	60357	0.497339	1819	2430	1.26265e-18	0.247759	0.0278993	0.000375901	-0.12039	0.0338038	2.64489e-06	0.131147	0.0278576	183	0.000484014	0.00757539	LncRNA	BSN-DT	Positive
Ex	ENSG00000164078	rs34034116	34721	17879	0.406877	1570	1988	2.07642e-13	0.209694	0.0283933	0.000368582	-0.108976	0.0305543	1.17967e-05	0.12298	0.028011	180	0.00212341	0.0246388	PCG	MST1R	Positive
Ex	ENSG00000186792	rs2236947	41153	38228	0.463569	1735	2265	1.77614e-271	-0.889224	0.0221246	3.05042e-06	0.119854	0.025619	1.47932e-05	-0.0964906	0.0222301	173	0.00255923	0.0279001	PCG	HYAL3	Positive
Ex	ENSG00000243477	rs2526398	-146237	-149251	0.340974	1366	1666	7.78323e-29	0.326077	0.0288894	0.00104468	-0.0911017	0.0277566	2.11887e-06	0.138394	0.029116	175	0.000370802	0.0059892	PCG	NAA80	Positive
Ex	BrainMetalnc.51102	rs323877	-863	-1872	0.275072	1164	1344	4.58268e-293	1.02652	0.0243039	7.09803e-10	-0.126226	0.0203964	1.05223e-12	0.177479	0.0247826	220	2.31491e-10	1.73104e-08	LncRNA	PCBP4	Positive
Ex	ENSG00000168268	rs11707864	-165635	-176193	0.171306	764	837	1.45091e-19	-0.338912	0.0371377	0.01716	0.0559859	0.0234752	3.80923e-06	-0.176422	0.0380864	299	0.00113896	0.0156256	PCG	NT5DC2	Positive
Ex	ENSG00000163938	rs4687680	192200	178871	0.376791	1475	1841	2.26823e-27	-0.310651	0.0283152	0.000670798	0.0992612	0.0291462	5.32271e-06	-0.129732	0.0284387	361	0.0019215	0.0229557	PCG	GNL3	Positive
Ex	ENSG00000114902	rs1010552	-198427	-201915	0.33422	1348	1633	4.08354e-08	0.163336	0.0296718	0.000130799	-0.109144	0.0284889	1.16701e-07	0.159248	0.0299653	368	4.29461e-05	0.00098532	PCG	SPCS1	Positive
Ex	BrainMetalnc.51151	rs1866268	-45715	-48485	0.416701	1591	2036	6.21684e-75	-0.502069	0.0264723	2.73636e-05	0.122274	0.0290964	1.20889e-09	-0.1629	0.0266927	376	4.54544e-07	1.63879e-05	LncRNA	NEK4	Positive
Ex	BrainMetalnc.51164	rs12638195	-197015	-199387	0.355915	1421	1739	1.47035e-09	0.177862	0.0292972	0.000687498	-0.0974323	0.028666	3.05747e-07	0.151299	0.0294689	423	0.000129331	0.00251076	LncRNA	SFMBT1	Positive
Ex	ENSG00000163933	rs2099162	533	-41437	0.326443	1331	1595	1.22801e-89	0.581384	0.0277703	7.27031e-07	-0.127644	0.0256984	3.35652e-13	0.201469	0.0275241	449	1.50708e-10	1.1703e-08	PCG	RFT1	Positive
Ex	BrainMetalnc.51240	rs9818750	77276	67948	0.388866	1531	1900	1.66729e-06	0.13959	0.0290701	0.000302405	-0.107138	0.0296088	8.46212e-08	0.156062	0.0290438	660	5.585e-05	0.00121249	LncRNA	ERC2	Positive
Ex	ENSG00000163947	rs55849986	4203	-347194	0.0949652	433	464	7.27241e-16	0.380462	0.0468504	0.0554558	-0.0415617	0.0216896	1.36792e-09	0.281405	0.0462631	487	6.66176e-07	2.27968e-05	PCG	ARHGEF3	Positive
Ex	ENSG00000239388	rs11130579	15216	-9127	0.387024	1522	1891	1.01817e-24	-0.296384	0.0285603	0.000962176	0.0958114	0.0289864	5.17183e-07	-0.145024	0.0288127	446	0.000230664	0.00412133	PCG	ASB14	Positive
Ex	ENSG00000168374	rs4597680	39015	12158	0.202006	892	987	1.23415e-77	0.642154	0.0332059	2.47417e-05	-0.0978878	0.0231672	2.74639e-10	0.205252	0.0323794	461	1.26608e-07	5.21679e-06	PCG	ARF4	Positive
Ex	ENSG00000168291	rs73081531	-123411	-129638	0.242939	1054	1187	2.06881e-103	0.69217	0.030532	2.27776e-06	-0.113017	0.0238513	9.59401e-10	0.187109	0.0304729	435	4.17339e-07	1.56039e-05	PCG	PDHB	Positive
Ex	BrainMetalnc.51376	rs1459640136	817	-3261	0.375154	1485	1833	5.55581e-23	0.286437	0.0287255	9.32618e-05	-0.115618	0.0295395	3.08497e-07	0.148266	0.0288878	879	0.000271169	0.00456242	LncRNA	PTPRG	Positive
Ex	BrainMetalnc.51386	rs9874646	9735	3036	0.32235	1342	1575	5.16305e-10	-0.190791	0.0305785	5.94101e-10	0.175424	0.0282166	5.17218e-18	-0.268536	0.0308054	926	4.78944e-15	6.04367e-13	LncRNA	CADPS	Positive
Ex	BrainMetalnc.51444	rs113528121	12003	9170	0.118707	544	580	6.10716e-07	-0.218541	0.043699	0.0522452	0.0434046	0.0223498	1.62628e-06	-0.223067	0.0464058	936	0.0015222	0.0195379	LncRNA	MAGI1	Positive
Ex	BrainMetalnc.51635	rs57416929	-48655	-64029	0.0528039	249	258	1.38457e-145	-1.52217	0.0552768	0.0103002	0.0477023	0.0185787	7.55894e-06	-0.255176	0.0568703	425	0.00321255	0.0321096	LncRNA		Positive
Ex	ENSG00000244026	rs57416929	-49578	-63136	0.0528039	249	258	9.55308e-144	-1.51363	0.0553723	0.00778402	0.0495698	0.0186108	9.49231e-06	-0.252815	0.0569685	422	0.00400576	0.03833	Other	-	Positive
Ex	BrainMetalnc.51639	rs150086868	124862	22604	0.190954	813	933	0.00508883	-0.0976707	0.0348339	0.0222982	0.0550943	0.0240933	6.00601e-06	-0.163342	0.0360088	453	0.00272072	0.0287599	LncRNA		Positive
Ex	ENSG00000239519	rs13083257	1482	-34342	0.39255	1531	1918	1.76907e-66	0.481458	0.0271051	3.6507e-07	-0.143264	0.028089	1.37249e-12	0.190275	0.0267084	273	3.74689e-10	2.36406e-08	LncRNA	CADM2-AS1	Positive
Ex	ENSG00000170854	rs1506444	-176010	-206649	0.490176	1804	2395	1.79704e-58	-0.446374	0.0269507	9.4657e-06	0.147683	0.0332739	2.88832e-08	-0.150201	0.0269845	370	1.06868e-05	0.000276623	PCG	RIOX2	Positive
Ex	BrainMetalnc.51880	rs1675512	2582	672	0.24519	1055	1198	3.89735e-292	1.06471	0.0252606	3.38717e-07	-0.101176	0.0197815	1.68806e-10	0.160138	0.0249638	419	7.07297e-08	3.03837e-06	LncRNA	AC021660.3	Positive
Ex	ENSG00000286602	rs1675512	1210	-3960	0.24519	1055	1198	4.33762e-168	0.850322	0.0283928	1.99179e-06	-0.105964	0.0222342	2.22457e-09	0.168442	0.0280592	420	9.34319e-07	3.13026e-05	LncRNA	AC021660.4	Positive
Ex	ENSG00000239445	rs10935480	6906	-19548	0.464797	1750	2271	3.6084e-135	-0.665794	0.0252347	1.04383e-10	0.185869	0.0286443	9.31e-18	-0.215056	0.0248669	419	3.90089e-15	5.2506e-13	LncRNA	ST3GAL6-AS1	Positive
Ex	ENSG00000064225	rs1440149	1573	-87392	0.252354	1091	1233	1.27281e-20	-0.307531	0.0327343	0.000538477	0.0905957	0.0261425	5.96518e-06	-0.143671	0.0316623	433	0.00258292	0.0279001	PCG	ST3GAL6	Positive
Ex	ENSG00000249274	rs2449001	207859	206854	0.346091	1382	1691	5.25627e-08	0.160247	0.0293517	0.000994398	-0.0927153	0.0281287	6.29594e-06	0.131853	0.0291316	412	0.00259393	0.0279001	Other	-	Positive
Ex	ENSG00000114021	rs13082297	17469	-9409	0.329513	1363	1610	5.53264e-179	-0.799712	0.025728	6.9262e-20	0.22171	0.0240772	2.96098e-35	-0.319163	0.0253528	341	1.00969e-32	5.09643e-30	PCG	NIT2	Positive
Ex	ENSG00000243701	rs793618	22600	-94996	0.419975	1629	2052	4.28618e-08	0.158932	0.0289172	0.000659942	-0.108465	0.0318069	4.85784e-06	0.130486	0.0284834	540	0.00262323	0.0280228	LncRNA	DUBR	Positive
Ex	BrainMetalnc.52036	rs4855752	32030	-1022	0.272206	1144	1330	2.46868e-36	0.394242	0.0308092	0.000439226	-0.0908829	0.025818	2.8775e-09	0.179085	0.0300449	518	1.49055e-06	4.77685e-05	LncRNA		Positive
Ex	ENSG00000273125	rs4855752	31998	-1022	0.272206	1144	1330	2.05491e-38	0.40561	0.0307559	0.000460417	-0.0904014	0.0257733	4.70931e-09	0.17631	0.0299929	518	2.43942e-06	7.19052e-05	LncRNA	LINC01990	Positive
Ex	ENSG00000240057	rs9811344	106860	-58049	0.290422	1224	1419	7.18322e-06	-0.141748	0.0315139	9.34359e-05	0.105245	0.0268925	5.17632e-11	-0.211665	0.0320919	508	2.62957e-08	1.23468e-06	LncRNA	AC078785.1	Positive
Ex	BrainMetalnc.52172	rs2133628	-5773	-9417	0.480557	1791	2348	6.94857e-35	0.3477	0.0277783	8.11674e-06	-0.149175	0.0333601	1.14039e-08	0.160812	0.0280741	494	5.63354e-06	0.00015581	LncRNA		Positive
Ex	BrainMetalnc.52414	rs1550756	-46381	-128025	0.325829	1331	1592	3.59814e-13	-0.218995	0.0299575	3.76447e-06	0.130475	0.0281523	1.58682e-09	-0.182321	0.0300933	596	9.45745e-07	3.13026e-05	LncRNA	KALRN	Positive
Ex	BrainMetalnc.52416	rs12634095	-4076	-9208	0.105608	489	516	4.50263e-11	-0.303915	0.0459323	0.00572776	0.0613986	0.0222023	8.89183e-08	-0.244355	0.0455521	580	5.15726e-05	0.00113179	LncRNA	KALRN	Positive
Ex	BrainMetalnc.52419	rs62265345	34537	-96396	0.324396	1317	1585	1.33226e-09	-0.180993	0.0297343	3.2261e-07	0.142758	0.0278608	4.854e-13	-0.212215	0.0291946	586	2.84444e-10	1.98987e-08	LncRNA	KALRN	Positive
Ex	ENSG00000171084	rs12695470	255	-13149	0.15002	677	733	1.3548e-304	1.29981	0.030003	0.0779451	-0.0312381	0.0177139	1.14373e-07	0.157898	0.0296906	656	7.50288e-05	0.00153013	Other	-	Positive
Ex	ENSG00000189366	rs12630605	122795	116313	0.285919	1213	1397	6.0261e-226	-0.931588	0.0260223	0.000126849	0.0824683	0.0214836	8.0147e-07	-0.12906	0.0260839	641	0.000513742	0.00785792	PCG	ALG1L	Positive
Ex	ENSG00000114547	rs34579333	-9175	-23469	0.446173	1709	2180	9.47199e-134	0.673558	0.025684	3.60504e-06	-0.134972	0.0290661	3.48813e-07	0.127346	0.0249254	629	0.000219403	0.00399077	PCG	ROPN1B	Positive
Ex	ENSG00000159685	rs113706892	256038	-142	0.0595579	283	291	1.36485e-61	0.977185	0.0573533	0.173926	-0.0275433	0.020251	3.41303e-09	0.321688	0.0542272	720	2.45738e-06	7.19052e-05	PCG	CHCHD6	Positive
Ex	ENSG00000163913	rs72982655	-50108	-130435	0.185837	824	908	1.83147e-141	-0.866895	0.0320075	1.98791e-05	0.0904557	0.0211609	7.48503e-13	-0.22841	0.0316842	435	3.25599e-10	2.19128e-08	PCG	IFT122	Positive
Ex	ENSG00000172765	rs1872116	-36145	-281959	0.121367	563	593	0.00288916	-0.131515	0.0440984	0.0535708	0.0440646	0.0228169	9.05408e-07	-0.218851	0.0444473	442	0.00040019	0.00641257	PCG	TMCC1	Positive
Ex	BrainMetalnc.52620	rs12495527	-12670	-46443	0.490995	1807	2399	0.0126818	0.0703413	0.0281994	2.49033e-09	-0.208602	0.034857	3.7704e-14	0.214961	0.0282319	377	1.42144e-11	1.35436e-09	LncRNA		Positive
Ex	ENSG00000285631	rs6789666	19288	16558	0.445149	1684	2175	1.64371e-110	-0.605731	0.0257415	3.66488e-07	0.150311	0.029475	3.35182e-08	-0.145888	0.0263342	435	1.45804e-05	0.000367973	LncRNA	AC097105.1	Positive
Ex	BrainMetalnc.52649	rs6789666	19288	16208	0.445149	1684	2175	5.22702e-114	-0.614664	0.0256664	7.85225e-07	0.145531	0.029389	1.02663e-07	-0.140161	0.0262573	435	4.46582e-05	0.00101309	LncRNA		Positive
Ex	BrainMetalnc.52697	rs16840309	156492	-22204	0.11359	527	555	2.89932e-20	0.412432	0.0443257	0.00056295	-0.075874	0.0219706	1.8106e-14	0.337889	0.0438215	620	1.12257e-11	1.13324e-09	LncRNA	BFSP2	Positive
Ex	BrainMetalnc.52782	rs34330586	-50578	-57362	0.23905	1031	1168	2.54521e-23	-0.330616	0.0328908	0.00164159	0.0786553	0.0249546	7.11429e-09	-0.190345	0.0327688	340	2.41886e-06	7.19052e-05	LncRNA	PPP2R3A	Positive
Ex	ENSG00000181322	rs9289556	52902	-15547	0.293287	1210	1433	4.94955e-103	-0.633841	0.0280165	8.29735e-06	0.10895	0.0243905	1.88257e-10	-0.176658	0.027612	353	6.64546e-08	2.91678e-06	PCG	NME9	Positive
Ex	ENSG00000158234	rs67037472	-148143	-172910	0.470937	1759	2301	1.1339e-118	-0.627438	0.0256126	0.000423775	0.105236	0.0298148	3.84853e-07	-0.128677	0.025279	345	0.000132774	0.00255306	PCG	FAIM	Positive
Ex	BrainMetalnc.53180	rs3772572	-51429	-54488	0.289603	1214	1415	0	-1.2397	0.0190423	1.27676e-15	0.12778	0.0158726	9.78796e-17	-0.16004	0.0191268	619	6.05875e-14	7.19566e-12	LncRNA	HLTF	Positive
Ex	BrainMetalnc.53220	rs13089357	120873	-16558	0.216537	946	1058	2.37208e-05	0.146057	0.0344895	0.000113634	-0.098942	0.0255944	4.99037e-09	0.200117	0.0340993	695	3.46831e-06	9.8627e-05	LncRNA	TSC22D2	Positive
Ex	BrainMetalnc.53305	rs789298	100428	84625	0.220221	957	1076	6.15133e-116	-0.748199	0.0309477	0.00252661	0.0694411	0.0229689	6.65362e-06	-0.14121	0.0312805	451	0.00300078	0.0307542	LncRNA	DHX36	Positive
Ex	ENSG00000169359	rs73875871	-580992	-614424	0.0665166	313	325	1.97072e-08	-0.31905	0.0566361	0.144449	0.0313522	0.0214758	1.92298e-06	-0.267098	0.0559609	425	0.000817267	0.0117897	PCG	SLC33A1	Positive
Ex	BrainMetalnc.53374	rs4680340	-17159	-140032	0.25747	1087	1258	2.77897e-254	-0.983515	0.0255141	0.0058975	0.0568356	0.0206236	3.58888e-07	-0.133569	0.0261714	389	0.000139607	0.00263427	LncRNA	VEPH1	Positive
Ex	ENSG00000243176	rs4680344	472	-206482	0.340565	1368	1664	1.29323e-101	-0.602725	0.0268484	1.10337e-09	0.158052	0.0258356	6.44652e-18	-0.235806	0.0271309	391	2.52059e-15	3.63505e-13	LncRNA	AC092944.1	Positive
Ex	ENSG00000197415	rs10936090	165223	-108654	0.440647	1671	2153	6.00791e-27	-0.303393	0.0278894	4.46543e-05	0.126453	0.0309222	5.43003e-06	-0.127139	0.0278961	400	0.00217201	0.0250588	PCG	VEPH1	Positive
Ex	BrainMetalnc.53390	rs6807468	-218585	-227272	0.284486	1186	1390	1.5286e-84	-0.589464	0.0290828	0.00189666	0.0779353	0.0250649	8.26728e-06	-0.127322	0.0284984	344	0.00284394	0.0295975	LncRNA	RSRC1	Positive
Ex	ENSG00000079257	rs9817928	82983	56157	0.388866	1527	1900	5.38448e-98	0.587291	0.0266961	0.00178028	-0.0857111	0.0274005	2.91828e-08	0.145322	0.0261164	337	9.83462e-06	0.000261264	PCG	LXN	Positive
Ex	ENSG00000118849	rs16829322	11375	-23930	0.295948	1204	1446	2.32597e-72	0.523366	0.0281292	1.64233e-09	-0.153276	0.0253228	1.54749e-20	0.263341	0.0280944	330	5.10672e-18	1.03105e-15	PCG	RARRES1	Positive
Ex	ENSG00000240207	rs12489730	5564	-43945	0.21449	920	1048	1.23512e-176	0.89129	0.0289003	0.00873288	-0.0551425	0.021011	1.33272e-08	0.166477	0.0292	348	4.63786e-06	0.000130053	LncRNA	AC080013.1	Positive
Ex	ENSG00000270321	rs9985337	36531	29041	0.234957	1007	1148	1.2985e-49	0.48362	0.0319245	0.0101469	-0.0620536	0.0241192	4.95003e-07	0.165267	0.0327792	577	0.000285617	0.00472673	LncRNA	AC007953.2	Positive
Ex	ENSG00000172667	rs150049975	80265	-31829	0.0611953	291	299	5.28713e-09	-0.347308	0.0592784	0.0687095	0.0387532	0.0212798	2.37944e-06	-0.284005	0.06005	533	0.00126824	0.0170705	PCG	ZMAT3	Positive
Ex	BrainMetalnc.53795	rs9831543	26420	25387	0.303316	1251	1482	1.32418e-16	-0.252819	0.0303483	0.000578852	0.0932362	0.0270574	1.34767e-07	-0.16086	0.0304208	519	6.9944e-05	0.00145585	LncRNA	ZMAT3	Positive
Ex	BrainMetalnc.53824	rs34508522	55793	-196803	0.126893	573	620	5.54705e-24	0.422199	0.0413629	0.0290454	-0.048607	0.0222543	3.98593e-06	0.192536	0.0416504	453	0.00180563	0.0221441	LncRNA	PEX5L	Positive
Ex	ENSG00000205981	rs4855000	14633	8581	0.231273	986	1130	2.01511e-09	-0.199328	0.0331144	0.00306543	0.0739368	0.0249444	1.08205e-05	-0.142837	0.0323945	364	0.00393866	0.0382316	PCG	DNAJC19	Positive
Ex	BrainMetalnc.53918	rs59448431	25978	-45633	0.121163	552	592	9.87579e-08	-0.230341	0.0430939	0.0229252	0.0521445	0.0229094	7.80084e-06	-0.188225	0.0420125	540	0.00421245	0.0399293	LncRNA	MCF2L2	Positive
Ex	ENSG00000176597	rs6794001	30403	-14848	0.152476	679	745	1.37905e-13	0.286819	0.0385468	0.000151638	-0.0879172	0.0231706	6.4609e-13	0.271898	0.03761	538	3.47596e-10	2.26386e-08	PCG	B3GNT5	Positive
Ex	BrainMetalnc.53930	rs9827156	204386	-15973	0.265248	1126	1296	2.75894e-12	-0.221117	0.0314741	1.35126e-11	0.174874	0.0257335	6.05558e-26	-0.34234	0.0321279	770	4.66279e-23	1.56903e-20	LncRNA	KLHL24	Positive
Ex	BrainMetalnc.53976	rs843369	-14629	-43625	0.30659	1279	1498	3.40376e-41	-0.412299	0.0301017	0.000626242	0.0898586	0.0262404	5.06894e-06	-0.13881	0.03036	738	0.00374088	0.0364871	LncRNA		Positive
Ex	ENSG00000145198	rs2668189	23833	11962	0.220835	958	1079	9.06062e-199	-0.942467	0.0284727	8.98203e-05	0.0824068	0.0210054	3.2405e-08	-0.153683	0.0277114	728	2.35908e-05	0.000580852	PCG	VWA5B2	Positive
Ex	BrainMetalnc.54024	rs7642996	16970	6104	0.265452	1121	1297	1.2771e-25	0.332659	0.0314343	9.35007e-05	-0.100907	0.0257852	1.08753e-06	0.156509	0.0320223	654	0.000711244	0.0104818	LncRNA	VPS8	Positive
Ex	ENSG00000113889	rs67173199	-2354	-29341	0.320098	1316	1564	1.76957e-208	-0.857401	0.0251633	8.2051e-09	0.131324	0.0227029	5.51712e-15	-0.201364	0.0256041	926	5.10886e-12	5.42883e-10	PCG	KNG1	Positive
Ex	ENSG00000145012	rs2216856	676858	-5616	0.412607	1584	2016	7.63076e-09	-0.163565	0.0282162	2.82144e-06	0.143981	0.0306706	1.09131e-12	-0.201115	0.028103	1123	1.22554e-09	6.68746e-08	PCG	LPP	Positive
Ex	BrainMetalnc.54174	rs2675416	19261	-175287	0.239664	1015	1171	6.28354e-28	0.350697	0.0316161	4.13765e-08	-0.135382	0.0246042	1.52884e-20	0.301832	0.0321962	908	1.38818e-17	2.54795e-15	LncRNA	CLDN1	Positive
Ex	ENSG00000225764	rs2675416	18891	-5252	0.239664	1015	1171	7.9174e-51	0.47951	0.0312406	0.000624232	-0.0832763	0.024312	4.66934e-10	0.199007	0.0318139	854	3.98762e-07	1.51906e-05	LncRNA	P3H2-AS1	Positive
Ex	BrainMetalnc.54303	rs55958301	41111	-795	0.212853	920	1040	7.56329e-228	-1.00089	0.0278135	0.0001148	0.078028	0.0201975	1.97188e-07	-0.148867	0.0285352	1199	0.000236428	0.00415086	LncRNA		Positive
Ex	BrainMetalnc.54362	rs9829709	-3048	-4513	0.48465	1802	2368	6.05625e-122	0.63746	0.0256233	3.12989e-05	-0.132011	0.0316448	3.90488e-08	0.144382	0.0261908	1039	4.05717e-05	0.000943044	LncRNA	TNK2	Positive
Ex	BrainMetalnc.54368	rs3747669	-52101	-110621	0.295948	1222	1446	0.00249809	0.0933996	0.0308584	0.000620816	-0.0943048	0.0275196	1.4313e-06	0.155422	0.0321612	1075	0.00153865	0.0195379	LncRNA		Positive
Ex	ENSG00000161217	rs7625886	11807	-61928	0.369218	1467	1804	1.3283e-42	-0.394388	0.0282743	0.000228402	0.10537	0.028549	1.76861e-09	-0.167088	0.0276599	930	1.64481e-06	5.18886e-05	PCG	PCYT1A	Positive
Ex	BrainMetalnc.54397	rs58954032	14400	-307	0.207736	908	1015	7.74967e-31	0.399861	0.0341568	0.000776462	-0.0808397	0.0240216	1.0747e-06	0.163875	0.0335132	925	0.0009941	0.0139381	LncRNA	PCYT1A	Positive
Ex	ENSG00000174004	rs939874	399	-21911	0.384364	1521	1878	6.91226e-17	-0.243858	0.0289982	0.000278691	0.105926	0.0291035	2.56512e-06	-0.134658	0.0285653	1051	0.00269594	0.0286479	PCG	NRROS	Positive
Ex	ENSG00000119231	rs9784336	11814	-55044	0.494474	1800	2416	1.11796e-15	0.223772	0.027739	4.33318e-06	-0.156364	0.033954	7.0093e-08	0.149067	0.0275662	957	6.7079e-05	0.00142561	PCG	SENP5	Positive
Ex	ENSG00000286017	rs335823	-10389	-15877	0.387024	1508	1891	7.97933e-81	-0.529422	0.0267765	3.08727e-08	0.157715	0.0283944	5.34436e-10	-0.166413	0.0266948	931	4.9756e-07	1.73202e-05	LncRNA	AC011322.1	Positive
Ex	BrainMetalnc.54461	rs13076920	66880	-129862	0.46623	1747	2278	8.2041e-27	0.3018	0.0278192	2.70311e-07	-0.172657	0.0334766	3.36389e-11	0.182513	0.0274029	943	3.17215e-08	1.42324e-06	LncRNA	DLG1	Positive
Ex	ENSG00000272989	rs4857527	38592	36868	0.290626	1217	1420	4.21242e-27	0.337174	0.0308984	0.00613147	-0.0738563	0.0269248	2.58714e-06	0.145473	0.0308709	714	0.00184722	0.0223326	LncRNA	LINC02012	Positive
Ex	BrainMetalnc.54481	rs9868761	-14340	-45434	0.221858	970	1084	1.00148e-67	0.584368	0.0325663	0.000469666	-0.0842213	0.0240479	5.2542e-10	0.198641	0.0318509	712	3.74099e-07	1.45251e-05	LncRNA		Positive
Ex	BrainMetalnc.54476	rs78471347	37515	-132626	0.0826852	388	404	1.43642e-44	0.71367	0.049929	0.269499	-0.0233552	0.0211461	3.50318e-06	0.222648	0.0478855	712	0.00249426	0.0273691	LncRNA	FYTTD1	Positive
Ex	ENSG00000226435	rs13092044	27491	293	0.481785	1787	2354	1.301e-64	0.470386	0.0268967	0.00121937	-0.105538	0.0325924	1.13059e-06	0.133669	0.0273924	379	0.000428495	0.00680267	Other	-	Positive
Ex	ENSG00000266456	rs507757	-67497	-70005	0.307	1266	1500	6.85793e-38	-0.388964	0.0297137	4.00154e-05	0.110044	0.0267426	9.12934e-09	-0.17012	0.0295026	824	7.52257e-06	0.000267715	LncRNA	C18orf56	Positive
Ex	ENSG00000132199	rs9948583	4682	-37662	0.328694	1350	1606	2.01219e-06	-0.144976	0.0304335	0.000963168	0.0946394	0.0286344	1.51585e-06	-0.147717	0.03064	833	0.00126271	0.0173622	PCG	ENOSF1	Positive
Ex	ENSG00000263724	rs12969706	-12400	-31411	0.111134	514	543	1.98663e-58	-0.71196	0.0430034	0.0030731	0.0630886	0.02129	9.50293e-11	-0.276875	0.0425748	1222	1.16126e-07	7.80623e-06	LncRNA	DLGAP1-AS3	Positive
Ex	ENSG00000263753	rs1044656	6173	-5736	0.422636	1628	2065	4.16639e-234	0.84912	0.0232019	3.62532e-05	-0.107025	0.0258651	7.44513e-09	0.134929	0.0232596	927	6.90163e-06	0.000260968	LncRNA	LINC00667	Positive
Ex	BrainMetalnc.33253	rs9965084	7183	-66887	0.300246	1252	1467	0	-1.05113	0.0228846	3.10254e-06	0.0943379	0.02018	2.87178e-08	-0.129146	0.0231976	977	2.80573e-05	0.000707278	LncRNA		Positive
Ex	BrainMetalnc.33254	rs11873510	11686	-3724	0.173148	774	846	2.04947e-178	0.987757	0.031838	9.03153e-05	-0.0785812	0.020037	3.05257e-16	0.272048	0.0330624	911	2.78089e-13	3.36488e-11	LncRNA		Positive
Ex	BrainMetalnc.33256	rs7190	11252	-19355	0.351617	1411	1718	0.00519026	0.0830181	0.0296757	0.00210004	-0.090412	0.029364	3.46081e-06	0.138217	0.0297105	923	0.00319433	0.0394402	LncRNA	TMEM200C	Positive
Ex	BrainMetalnc.33406	rs12967365	14199	-19265	0.465616	1757	2275	1.42876e-157	0.71894	0.0249338	7.03276e-05	-0.115841	0.029091	1.5998e-06	0.119695	0.0248837	782	0.00125104	0.0173622	LncRNA		Positive
Ex	BrainMetalnc.33684	rs955621	26721	-1723	0.459271	1734	2244	0	1.17458	0.0158289	5.97837e-24	-0.185514	0.0181883	5.56274e-33	0.190501	0.0156897	636	3.5379e-30	2.14043e-27	LncRNA		Positive
Ex	ENSG00000266489	rs955621	26120	-1335	0.459271	1734	2244	0	1.18663	0.0155288	1.97835e-21	-0.171224	0.0178435	1.37184e-29	0.17619	0.0153923	636	8.72489e-27	2.63928e-24	LncRNA	AC007922.3	Positive
Ex	ENSG00000141380	rs963267	190638	115674	0.429595	1643	2099	5.66584e-07	-0.143081	0.0285269	0.000431083	0.112689	0.0319674	1.28171e-06	-0.138998	0.0286315	683	0.000875411	0.0135801	PCG	SS18	Positive
Ex	ENSG00000263677	rs8096168	3468	1802	0.422431	1633	2064	9.50823e-19	-0.253979	0.0284954	3.01573e-05	0.133238	0.031874	6.82486e-07	-0.145873	0.0292955	633	0.000432014	0.00706401	LncRNA	AC012588.1	Positive
Ex	ENSG00000134765	rs1437608	45775	12155	0.363488	1454	1776	0	-1.02341	0.0211858	2.86016e-09	0.129013	0.0216408	7.61115e-10	-0.137951	0.0223314	556	4.2318e-07	2.32749e-05	PCG	DSC1	Positive
Ex	BrainMetalnc.33806	rs7228817	-8679	-13111	0.275276	1164	1345	0.0330745	0.0681334	0.0319517	0.000719775	-0.0914295	0.0270002	2.04339e-08	0.180046	0.0319968	530	1.083e-05	0.000337527	LncRNA	TRAPPC8	Positive
Ex	BrainMetalnc.33811	rs111443702	7183	5602	0.0558739	260	273	0.00179724	0.189582	0.0606606	0.33086	-0.020635	0.0212168	6.39662e-07	0.310661	0.0622315	526	0.000336462	0.00598705	LncRNA	TRAPPC8	Positive
Ex	BrainMetalnc.33877	rs553192	48596	-2410	0.186451	816	911	2.46617e-48	-0.51625	0.0345643	0.00130264	0.0733626	0.0227895	5.55437e-13	-0.249144	0.034363	399	2.21619e-10	1.91542e-08	LncRNA	MAPRE2	Positive
Ex	BrainMetalnc.33882	rs472643	35945	34768	0.0509619	242	249	0.0125918	-0.161047	0.0644974	0.182126	0.0281148	0.0210658	4.07562e-07	-0.342514	0.0674338	397	0.000161802	0.00315775	LncRNA		Positive
Ex	BrainMetalnc.33912	rs1970663	29934	28442	0.396848	1561	1939	2.57012e-67	-0.493497	0.0275934	0.000449038	0.102069	0.0290443	8.03224e-08	-0.149364	0.0277483	475	3.81531e-05	0.000923306	LncRNA	ELP2	Positive
Ex	ENSG00000285940	rs11877758	-7134	-203985	0.313344	1301	1531	2.92243e-13	0.224919	0.0306483	0.000393158	-0.100007	0.0281745	2.47803e-07	0.153956	0.0297557	579	0.000143478	0.00289348	LncRNA	AC009899.1	Positive
Ex	ENSG00000141622	rs2365332	134378	-1953	0.329922	1362	1612	9.84833e-08	-0.163185	0.030527	8.58191e-06	0.129775	0.0290999	1.89356e-08	-0.171972	0.0304899	683	1.2933e-05	0.000372593	PCG	RNF165	Positive
Ex	ENSG00000101638	rs34009866	9453	-79508	0.0583299	276	285	0.000513507	-0.213442	0.0613645	0.0506892	0.0419925	0.0214788	2.77317e-08	-0.321066	0.0576071	644	1.78592e-05	0.000491129	PCG	ST8SIA5	Positive
Ex	ENSG00000270112	rs3897629	3069	-42326	0.480352	1769	2347	8.9744e-108	0.583548	0.025151	5.62553e-18	-0.267552	0.0307272	1.97816e-25	0.26458	0.0251032	612	1.21063e-22	1.83108e-20	LncRNA	AC090241.2	Positive
Ex	ENSG00000078043	rs35830991	-27991	-144921	0.281826	1175	1377	2.65785e-25	-0.322204	0.0306551	1.40284e-05	0.115232	0.0264762	1.35795e-09	-0.185292	0.0304561	622	8.44648e-07	4.25843e-05	PCG	PIAS2	Positive
Ex	ENSG00000278983	rs1489167	-126064	-129611	0.351003	1412	1715	4.8794e-13	-0.21455	0.0295187	0.000523882	0.09951	0.0286535	6.63907e-08	-0.159566	0.0294543	896	5.9486e-05	0.00132527	Other	-	Positive
Ex	ENSG00000278971	rs2366382	-7941	-9516	0.15923	729	778	9.73892e-138	-0.932462	0.0349616	0.0021475	0.0644216	0.0209684	9.10629e-09	-0.201013	0.0348577	697	6.34709e-06	0.000255999	Other	-	Positive
Ex	BrainMetalnc.34790	rs7242091	160	-5922	0.409537	1590	2001	1.11594e-63	-0.47392	0.0273147	1.63515e-05	0.125782	0.0291276	6.99512e-09	-0.161617	0.0278094	1281	8.96075e-06	0.000301181	LncRNA	MBP	Positive
Ex	BrainMetalnc.34904	rs72982284	-41339	-44938	0.144699	653	707	4.10831e-21	0.378243	0.0397422	0.084623	-0.0396674	0.0229933	6.90186e-06	0.178989	0.0397181	560	0.00386504	0.04585	LncRNA		Positive
Ex	ENSG00000287879	rs72982284	-41339	-44938	0.144699	653	707	4.91892e-21	0.377487	0.039744	0.0830143	-0.0398761	0.0229943	6.37224e-06	0.179675	0.0397199	560	0.00356845	0.0431783	LncRNA	AC114341.2	Positive
Ex	ENSG00000101546	rs7231072	35810	19548	0.337495	1359	1649	1.80263e-34	0.354257	0.028486	2.28354e-15	-0.216875	0.0271875	1.1095e-28	0.327537	0.0291035	521	5.78047e-26	1.16573e-23	PCG	RBFA	Positive
Ex	BrainMetalnc.34909	rs12606997	13769	13218	0.294106	1218	1437	2.10327e-22	-0.297449	0.0302498	2.04617e-07	0.139899	0.0268519	3.84144e-15	-0.241937	0.0305829	524	2.01291e-12	2.02969e-10	LncRNA	AC090360.1	Positive
Ex	ENSG00000178184	rs67491878	88092	-2190	0.407695	1587	1992	3.52822e-07	-0.147471	0.0288768	0.000752076	0.107156	0.0317581	1.85041e-06	-0.140838	0.0294595	512	0.000947412	0.0143296	PCG	PARD6G	Positive
Ex	ENSG00000278000	rs56060717	2256	1595	0.370241	1464	1809	2.02306e-76	0.522428	0.02725	2.49306e-06	-0.130848	0.0277226	8.83996e-13	0.203269	0.0282877	519	4.58794e-10	3.46963e-08	LncRNA	AC139100.2	Positive
Ex	ENSG00000130508	rs7594023	18226	-94739	0.111543	518	545	9.13411e-05	-0.178459	0.0455361	0.058138	0.0427144	0.022534	8.94122e-07	-0.222641	0.0451942	981	0.000877134	0.0120078	PCG	PXDN	Positive
Ex	ENSG00000237720	rs4853769	125146	-7998	0.498977	1814	2438	8.78721e-38	0.353043	0.0270112	3.11821e-10	-0.212204	0.0335816	1.6893e-14	0.213523	0.0276597	1061	1.79234e-11	1.31097e-09	LncRNA	AC011995.2	Positive
Ex	BrainMetalnc.38516	rs6548073	-3019	-5591	0.497544	1841	2431	8.73248e-05	0.112984	0.0287495	8.35972e-05	-0.138634	0.0351817	7.84404e-07	0.14069	0.0284102	991	0.000777345	0.0108152	LncRNA		Positive
Ex	BrainMetalnc.38543	rs10188054	13517	-103	0.130168	599	636	2.98163e-41	0.5629	0.0410659	0.000265939	-0.0808962	0.0221527	2.31101e-15	0.328804	0.0412268	1040	2.40345e-12	2.12166e-10	LncRNA	TRAPPC12	Positive
Ex	ENSG00000234171	rs4849986	-3656	-10024	0.347319	1392	1697	1.34255e-283	-0.941716	0.0227785	0.00769413	0.060866	0.0228183	4.72075e-07	-0.113617	0.0224941	1011	0.000477268	0.00722962	LncRNA	RNASEH1-AS1	Positive
Ex	BrainMetalnc.38614	rs4669154	-9109	-51597	0.393778	1558	1924	7.20017e-14	0.219151	0.0291109	1.58296e-05	-0.131103	0.0303092	3.42788e-08	0.161128	0.0291062	752	2.57776e-05	0.000532183	LncRNA		Positive
Ex	BrainMetalnc.38695	rs1454608906	-31846	-32722	0.15616	707	763	5.37125e-32	0.457765	0.0383272	0.00388608	-0.0671881	0.0232482	8.23149e-08	0.204454	0.0380141	927	7.63059e-05	0.00140535	LncRNA	ADAM17	Positive
Ex	ENSG00000271855	rs17525614	-16174	-17050	0.157798	714	771	4.68334e-28	0.426187	0.0383263	0.00470047	-0.0661797	0.0233893	1.9855e-07	0.197718	0.0379084	927	0.000184056	0.00318367	LncRNA	AC073195.1	Positive
Ex	BrainMetalnc.38738	rs4669602	104545	80997	0.427139	1623	2087	2.11532e-111	0.605443	0.0256133	8.60304e-05	-0.113671	0.0288977	4.54913e-07	0.127114	0.0251306	1109	0.000504498	0.00759715	LncRNA		Positive
Ex	ENSG00000145063	rs1546599	18513	-8991	0.136512	629	667	2.87302e-29	-0.46138	0.0405468	7.2476e-08	0.121151	0.022429	7.07927e-23	-0.402221	0.0404385	1122	7.94294e-20	2.54174e-17	LncRNA	AC062028.1	Positive
Ex	BrainMetalnc.38771	rs10929722	11872	-5453	0.456406	1718	2230	4.12884e-10	0.176337	0.0281023	1.10095e-09	-0.195568	0.0319663	5.48973e-15	0.215355	0.027381	1120	6.1485e-12	5.07747e-10	LncRNA		Positive
Ex	BrainMetalnc.38779	rs4611620	144093	69077	0.220221	961	1076	3.62569e-37	-0.433125	0.0334345	0.000363699	0.0877261	0.0245722	3.86618e-07	-0.176899	0.0347584	1163	0.000449637	0.00685161	LncRNA	ROCK2	Positive
Ex	BrainMetalnc.38870	rs4632345	-16925	-28063	0.320303	1315	1565	5.52821e-165	0.775222	0.0261709	0.000981227	-0.0785777	0.0238124	1.15587e-08	0.151672	0.0264893	718	8.29915e-06	0.000189695	LncRNA		Positive
Ex	ENSG00000279663	rs6759839	-102155	-106160	0.316824	1296	1548	1.07868e-48	0.436708	0.0291216	0.00470096	-0.0746862	0.026396	1.40307e-07	0.155357	0.0294215	716	0.00010046	0.00182396	Other	-	Positive
Ex	ENSG00000183891	rs7594214	9977	4625	0.0820712	382	401	2.45513e-209	1.44108	0.0421875	2.10927e-07	-0.0938465	0.0180324	8.3582e-14	0.303461	0.0404174	725	6.0597e-11	4.08232e-09	PCG	TTC32	Positive
Ex	BrainMetalnc.39085	rs11125629	139945	-65956	0.446787	1678	2183	0.00776779	-0.0748623	0.0280993	2.67195e-07	0.167732	0.0325078	3.92226e-11	-0.187956	0.028318	501	1.96505e-08	8.67334e-07	LncRNA	NCOA1	Positive
Ex	BrainMetalnc.39138	rs6546620	35847	-82290	0.201392	886	984	1.8868e-10	-0.225534	0.0352533	0.00133389	0.0787674	0.0245205	1.26364e-07	-0.186968	0.0352786	483	6.10338e-05	0.00115738	LncRNA	KIF3C	Positive
Ex	ENSG00000138018	rs6546910	-24430	-74235	0.448629	1701	2192	1.20739e-21	0.27158	0.028147	0.000641921	-0.110025	0.0321928	1.34202e-06	0.133989	0.0276522	413	0.000554253	0.00820166	PCG	SELENOI	Positive
Ex	ENSG00000115234	rs59644396	52720	45982	0.372288	1494	1819	5.53101e-59	0.469105	0.0281892	4.8711e-07	-0.141132	0.027975	4.42002e-12	0.201601	0.0289742	366	1.61773e-09	9.20306e-08	PCG	SNX17	Positive
Ex	ENSG00000157992	rs112882369	-28775	-32890	0.357962	1446	1749	1.20484e-22	0.29087	0.0294068	0.000119985	-0.111086	0.0288356	5.11798e-07	0.151731	0.0301331	396	0.000202672	0.00348215	PCG	KRTCAP3	Positive
Ex	ENSG00000138002	rs6760828	-88013	-133425	0.388457	1538	1898	2.50248e-29	0.327074	0.0287118	0.0009394	-0.0973318	0.0293865	1.68032e-06	0.141298	0.0294355	421	0.000707415	0.0101172	PCG	IFT172	Positive
Ex	BrainMetalnc.39261	rs12618103	21811	10162	0.272206	1135	1330	1.71641e-20	0.290431	0.031022	0.00117337	-0.0833466	0.0256521	3.10152e-06	0.145625	0.0311505	464	0.00143911	0.0182382	LncRNA	BABAM2	Positive
Ex	ENSG00000189350	rs74175081	646	-94973	0.226566	981	1107	0	1.31146	0.0216425	0.481561	-0.0114793	0.0163081	2.95171e-08	0.120857	0.0217276	762	2.2492e-05	0.000475864	PCG	TOGARAM2	Positive
Ex	ENSG00000119820	rs176416	149250	110560	0.432869	1665	2115	2.1037e-27	0.309405	0.0281832	6.15389e-09	-0.181295	0.0310793	3.08727e-10	0.175965	0.0278398	605	1.8678e-07	6.7346e-06	PCG	YIPF4	Positive
Ex	BrainMetalnc.39381	rs6724235	192333	8268	0.214695	924	1049	2.03408e-12	0.238763	0.0337777	0.00165528	-0.0765124	0.0242935	1.4089e-08	0.19557	0.0343609	745	1.04963e-05	0.000231643	LncRNA	BIRC6	Positive
Ex	BrainMetalnc.39394	rs11124289	175402	163128	0.266476	1148	1302	2.33372e-19	0.292738	0.0322668	1.98417e-06	-0.125399	0.0263081	1.2686e-11	0.222379	0.0326796	689	8.74069e-09	4.14373e-07	LncRNA	BIRC6	Positive
Ex	ENSG00000152689	rs17013237	101572	-26854	0.0998772	461	488	7.94039e-34	0.564802	0.0458829	0.0800228	-0.0380617	0.0217336	4.3761e-06	0.211199	0.0458821	976	0.00427107	0.0455581	PCG	RASGRP3	Positive
Ex	ENSG00000286415	rs4670866	56344	-1674	0.492632	1822	2407	1.86493e-163	0.719622	0.0244271	4.43698e-15	-0.232446	0.0294517	4.59843e-21	0.233112	0.0245245	985	4.52945e-18	1.28838e-15	LncRNA	AC017050.1	Positive
Ex	BrainMetalnc.39417	rs4670866	22832	-1656	0.492632	1822	2407	1.10563e-163	0.720108	0.0244237	5.07267e-15	-0.231908	0.0294476	5.77201e-21	0.232477	0.0245211	973	5.61617e-18	1.43774e-15	LncRNA		Positive
Ex	ENSG00000171055	rs11693359	52616	-61666	0.345886	1376	1690	1.73228e-76	-0.522665	0.0272491	1.80086e-10	0.168993	0.0263855	9.4204e-20	-0.24612	0.0268278	840	7.91313e-17	1.55828e-14	PCG	FEZ2	Positive
Ex	ENSG00000143891	rs11688977	3408	-71748	0.124437	573	608	4.4748e-237	1.28871	0.0349377	0.0127449	-0.0455093	0.0182573	2.96737e-11	0.243625	0.0364757	694	2.05935e-08	8.84542e-07	PCG	GALM	Positive
Ex	ENSG00000231312	rs12993058	94353	-115506	0.392141	1531	1916	3.84995e-103	-0.594097	0.0262443	4.48592e-08	0.151845	0.0276688	5.13577e-12	-0.183426	0.0264443	713	3.6618e-09	1.87484e-07	LncRNA	MAP4K3	Positive
Ex	ENSG00000115944	rs9677397	1454	-90088	0.46623	1757	2278	4.65654e-17	0.23897	0.0282572	1.05349e-06	-0.161235	0.0329467	2.36391e-11	0.188056	0.0280138	877	2.07315e-08	8.84542e-07	PCG	COX7A2L	Positive
Ex	ENSG00000138036	rs10190622	10552	-25419	0.0736799	345	360	6.11144e-12	0.37378	0.0540831	0.140221	-0.0318311	0.0215738	4.69055e-10	0.342987	0.0548374	848	3.97759e-07	1.26958e-05	PCG	DYNC2LI1	Positive
Ex	ENSG00000119878	rs13385693	22804	9843	0.451494	1722	2206	5.00454e-78	0.521737	0.0269045	6.77536e-07	-0.15417	0.0309528	7.62393e-11	0.176964	0.0270717	1224	9.33169e-08	3.61957e-06	PCG	CRIPT	Positive
Ex	BrainMetalnc.39791	rs6736039	88794	53127	0.400532	1548	1957	8.78466e-42	-0.380795	0.0275889	6.47581e-06	0.132512	0.0293161	2.29123e-07	-0.142585	0.0274794	909	0.000208273	0.00355453	LncRNA	MSH2	Positive
Ex	BrainMetalnc.39862	rs1014429	30694	-69544	0.366558	1442	1791	4.07445e-28	-0.314893	0.0282847	1.58735e-06	0.139152	0.0289192	3.08557e-09	-0.170545	0.0286679	733	2.26172e-06	5.8485e-05	LncRNA	NRXN1	Positive
Ex	ENSG00000286412	rs6545189	-12114	-17287	0.423659	1631	2070	5.94276e-20	0.260765	0.0282663	4.06085e-06	-0.141615	0.0306607	1.10281e-09	0.170382	0.0278508	710	7.82995e-07	2.25221e-05	LncRNA	AC007682.1	Positive
Ex	BrainMetalnc.39922	rs4671937	24104	-177299	0.498158	1803	2434	3.15905e-16	-0.22369	0.0271993	1.70999e-17	0.276474	0.0322363	6.15267e-24	-0.272061	0.0266813	719	4.42377e-21	1.61784e-18	LncRNA	SPTBN1	Positive
Ex	BrainMetalnc.39929	rs6736720	101302	35665	0.117274	545	573	1.38555e-07	0.235046	0.0444934	0.0762628	-0.0395589	0.022305	1.48337e-07	0.245608	0.0466043	631	9.36004e-05	0.00171155	LncRNA	EML6	Positive
Ex	BrainMetalnc.39948	rs4330143	102039	-51470	0.290831	1206	1421	0.0428404	0.0626045	0.0308956	6.45531e-06	-0.122145	0.0270185	3.57532e-13	0.226482	0.0309779	742	2.65289e-10	1.74138e-08	LncRNA	CCDC88A	Positive
Ex	BrainMetalnc.39950	rs10865286	31394	-9260	0.399713	1568	1953	4.69348e-08	-0.15882	0.0289825	1.57016e-05	0.135174	0.0312373	1.02155e-08	-0.168033	0.0292383	709	7.24277e-06	0.000170105	LncRNA	CCDC88A	Positive
Ex	ENSG00000237651	rs12616041	7641	-12119	0.422636	1636	2065	0	1.15613	0.017147	2.27343e-08	-0.104576	0.0186466	2.7397e-16	0.138734	0.0168333	489	1.33972e-13	1.55894e-11	PCG	C2orf74	Positive
Ex	ENSG00000170264	rs72891739	78489	49194	0.314163	1265	1535	0.0189771	-0.0701162	0.0298679	0.00050476	0.0965374	0.0277176	2.30239e-06	-0.142485	0.0300842	527	0.00121336	0.0157675	PCG	FAM161A	Positive
Ex	ENSG00000186889	rs11676567	5900	-77	0.373107	1498	1823	2.84319e-106	-0.622869	0.0270579	8.65941e-05	0.107207	0.0272653	5.99456e-07	-0.135209	0.0270164	464	0.000278148	0.00447835	PCG	TMEM17	Positive
Ex	ENSG00000243667	rs12713628	27006	-7604	0.247237	1067	1208	3.40891e-83	-0.619176	0.0308211	2.67756e-05	0.100993	0.0240042	4.14343e-09	-0.178739	0.0302955	731	3.02885e-06	7.60182e-05	PCG	WDR92	Positive
Ex	ENSG00000115946	rs2278788	-8464	-26814	0.369423	1479	1805	0.000629352	-0.101075	0.0295274	1.08222e-06	0.14653	0.0299746	3.66981e-11	-0.202118	0.0304059	727	2.66795e-08	1.11967e-06	PCG	PNO1	Positive
Ex	BrainMetalnc.40320	rs6546370	11658	-14985	0.322759	1313	1577	3.76224e-21	-0.282653	0.029669	0.000572909	0.094963	0.0275361	5.99375e-07	-0.149721	0.029916	703	0.000421361	0.0064981	LncRNA	CNRIP1	Positive
Ex	ENSG00000163219	rs10048745	55404	-91828	0.25747	1100	1258	1.14845e-173	-0.843023	0.0276113	4.7875e-09	0.13059	0.0222256	2.20304e-19	-0.250097	0.027547	636	1.40113e-16	2.56207e-14	PCG	ARHGAP25	Positive
Ex	BrainMetalnc.40413	rs2041689	8714	-210	0.236185	1004	1154	9.57835e-62	-0.532356	0.0312028	0.00156331	0.076289	0.0240945	5.33241e-10	-0.19324	0.0309964	705	3.75935e-07	1.25365e-05	LncRNA	AC007040.2	Positive
Ex	ENSG00000135624	rs2288631	-4801	-24402	0.300041	1243	1466	3.2798e-15	0.242265	0.0305466	0.000490841	-0.0944171	0.0270504	6.47695e-09	0.177588	0.030489	328	2.12444e-06	5.5819e-05	PCG	CCT7	Positive
Ex	ENSG00000163013	rs6711278	-56791	-86587	0.463774	1754	2266	0.000126163	-0.110663	0.0288184	6.663e-05	0.131469	0.0329089	2.48618e-06	-0.134508	0.0284947	334	0.000830384	0.0114907	PCG	FBXO41	Positive
Ex	ENSG00000163170	rs3762480	23801	11530	0.443921	1691	2169	2.54825e-17	-0.24128	0.0282892	2.55176e-06	0.148614	0.0315186	1.59928e-08	-0.15955	0.0281409	403	6.4451e-06	0.000154201	PCG	BOLA3	Positive
Ex	ENSG00000225439	rs828873	-6556	-10501	0.421408	1629	2059	2.63404e-200	-0.795943	0.0239343	1.66392e-08	0.149539	0.0264072	6.97211e-12	-0.165124	0.0239584	403	2.80976e-09	1.49854e-07	LncRNA	BOLA3-AS1	Positive
Ex	ENSG00000114978	rs11126425	1334	-25036	0.118911	546	581	1.73034e-25	0.451931	0.0428254	0.000423639	-0.0789042	0.022354	1.40204e-12	0.30565	0.0429212	440	6.16897e-10	3.83005e-08	PCG	MOB1A	Positive
Ex	ENSG00000115275	rs79181168	4007	-274	0.0591486	281	289	7.2389e-33	-0.715631	0.0590509	0.384234	0.018188	0.0208991	6.48993e-07	-0.265289	0.0531727	534	0.000346562	0.00551056	PCG	MOGS	Positive
Ex	ENSG00000273080	rs13011139	-7860	-8319	0.456201	1737	2229	1.2069e-181	-0.770733	0.0245788	0.000222933	0.104937	0.028384	1.87694e-09	-0.149872	0.0248502	434	8.14593e-07	2.31706e-05	LncRNA	AC009309.1	Positive
Ex	ENSG00000132313	rs9789526	8397	-6038	0.487106	1815	2380	2.37339e-91	0.562744	0.026599	0.00323972	-0.094623	0.0321088	4.71391e-06	0.123742	0.026974	431	0.00203169	0.0247394	PCG	MRPL35	Positive
Ex	ENSG00000287670	rs11127084	27542	22871	0.290626	1212	1420	1.85583e-92	-0.613182	0.0287899	0.000389391	0.0899043	0.0253101	1.04837e-06	-0.14245	0.0291024	345	0.000361687	0.00568048	LncRNA	AC108479.1	Positive
Ex	BrainMetalnc.40875	rs11127084	27542	21421	0.290626	1212	1420	1.02609e-172	-0.810962	0.0266478	3.47603e-06	0.108963	0.0234268	2.88276e-10	-0.170548	0.0269369	345	9.94551e-08	3.80007e-06	LncRNA		Positive
Ex	BrainMetalnc.41030	rs2320624	-113192	-117127	0.239869	1030	1172	6.07828e-75	-0.587791	0.0309899	1.3626e-05	0.104543	0.023985	6.04447e-11	-0.202231	0.030771	117	7.07203e-09	3.41592e-07	LncRNA	KCNIP3	Positive
Ex	BrainMetalnc.41056	rs2692934	136425	130955	0.317028	1302	1549	3.60837e-33	0.361273	0.029663	0.000143256	-0.104956	0.0275584	2.14293e-07	0.156702	0.0301271	161	3.45012e-05	0.000679408	LncRNA	ANKRD36C	Positive
Ex	ENSG00000144021	rs1168967	-105881	-113895	0.34691	1403	1695	6.5816e-11	0.195165	0.0297543	0.0029464	-0.0866171	0.0291025	1.6002e-05	0.129544	0.0299653	166	0.00265634	0.0303581	PCG	CIAO1	Positive
Ex	ENSG00000198885	rs2579547	-231618	-236818	0.407491	1579	1991	2.0516e-18	0.25077	0.0284172	0.000907218	-0.104224	0.0313748	9.59968e-06	0.128624	0.0289998	156	0.00149755	0.0187305	PCG	ITPRIPL1	Positive
Ex	ENSG00000168758	rs4907297	-794946	-805985	0.274253	1159	1340	0.0153873	-0.0776522	0.0320236	0.0229198	0.0608359	0.0267268	2.68731e-05	-0.137551	0.0326997	165	0.00443407	0.0467128	PCG	SEMA4C	Positive
Ex	ENSG00000144199	rs1256992	-80288	-91587	0.250512	1043	1224	2.45578e-81	-0.588806	0.0296766	0.00284558	0.0693883	0.0232303	3.42187e-09	-0.181122	0.0305341	185	6.33046e-07	1.90659e-05	PCG	FAHD2B	Positive
Ex	ENSG00000277701	rs1257107	-185221	-195731	0.231682	977	1132	1.11581e-280	-1.04212	0.0253769	0.0307952	0.040922	0.0189369	1.62819e-05	-0.11448	0.0265045	216	0.0035169	0.0383118	LncRNA	AC159540.2	Positive
Ex	ENSG00000163162	rs1660695	-52180	-89662	0.0937372	440	458	5.22555e-05	-0.1995	0.0492287	0.0707286	0.0397883	0.0220067	2.12069e-06	-0.240847	0.0506725	525	0.00111336	0.0146164	PCG	RNF149	Positive
Ex	BrainMetalnc.41275	rs12712095	-67656	-69046	0.466639	1742	2280	1.75137e-102	-0.582533	0.0258258	1.13816e-06	0.145984	0.0299243	3.66504e-11	-0.168938	0.0254137	529	1.93881e-08	8.67334e-07	LncRNA	CREG2	Positive
Ex	ENSG00000234177	rs881911	14616	3535	0.393778	1559	1924	9.36117e-201	0.813489	0.0244287	2.22891e-06	-0.119291	0.0251518	8.22976e-10	0.151335	0.024548	560	4.60867e-07	1.4388e-05	LncRNA	LINC01114	Positive
Ex	ENSG00000269707	rs6732009	58946	-15491	0.356324	1414	1741	9.03774e-134	0.67968	0.0259151	0.00168692	-0.0790479	0.0251429	7.99432e-06	0.11553	0.0258172	596	0.00476462	0.0497854	LncRNA	AC018730.1	Positive
Ex	ENSG00000196862	rs2118449	703600	637948	0.402988	1566	1969	4.78103e-121	0.638968	0.0257919	1.57169e-08	-0.158115	0.0278729	8.10817e-13	0.183004	0.0254249	384	3.11354e-10	1.99266e-08	PCG	RGPD4	Positive
Ex	ENSG00000198203	rs6760918	-755	-22031	0.167212	761	817	4.41488e-231	1.13793	0.0313461	2.14987e-06	-0.0929473	0.019567	5.49311e-09	0.179287	0.0306344	389	2.13682e-06	5.5819e-05	PCG	SULT1C2	Positive
Ex	ENSG00000163006	rs111486365	913399	814679	0.302292	1263	1477	0.0395522	-0.0644387	0.0312885	0.0040337	0.0774699	0.0269156	3.18435e-06	-0.148408	0.0317831	437	0.00139156	0.0178747	PCG	CCDC138	Positive
Ex	ENSG00000153093	rs4849442	444103	56032	0.471756	1769	2305	2.05836e-196	0.784982	0.0238864	5.30076e-07	-0.14047	0.0279344	9.64388e-10	0.145549	0.0237075	391	3.77076e-07	1.25365e-05	PCG	ACOXL	Positive
Ex	BrainMetalnc.41529	rs12615464	57083	40977	0.0757266	355	370	2.05824e-09	-0.323197	0.0537238	0.0261862	0.0482022	0.0216659	3.16309e-09	-0.312381	0.0525462	510	1.61318e-06	4.34709e-05	LncRNA	ZC3H8	Positive
Ex	ENSG00000286545	rs71414639	118245	113491	0.0763406	358	373	1.2573e-15	-0.42823	0.0531811	0.00519732	0.0601773	0.0215144	3.63707e-11	-0.347081	0.0522031	503	1.82945e-08	8.36319e-07	LncRNA	AC092645.2	Positive
Ex	BrainMetalnc.41552	rs6751117	16587	12540	0.1623	737	793	2.11353e-188	1.05021	0.0327677	0.0040958	-0.0574284	0.0199861	1.58154e-09	0.199124	0.0328638	464	7.33833e-07	2.15933e-05	LncRNA		Positive
Ex	ENSG00000237753	rs72948491	28848	24960	0.185837	840	908	2.2172e-142	0.892011	0.0328123	0.00938586	-0.0561358	0.0215929	8.65182e-09	0.191103	0.0330889	464	4.01444e-06	9.97765e-05	LncRNA	AC079922.2	Positive
Ex	BrainMetalnc.41578	rs2592460	6157	-27321	0.336267	1366	1643	1.18354e-199	-0.830927	0.0250357	9.64658e-06	0.103759	0.0233991	2.95406e-06	-0.120341	0.0256866	482	0.00142385	0.0181347	LncRNA	CBWD2	Positive
Ex	ENSG00000240356	rs11682527	57606	41018	0.382112	1508	1867	6.18588e-294	0.943352	0.0222915	0.000585831	-0.0803911	0.0233518	3.56037e-06	0.103548	0.0222864	508	0.00180867	0.022154	Other	-	Positive
Ex	ENSG00000228857	rs4848353	-8274	-20510	0.411175	1580	2009	1.49976e-10	-0.181592	0.0282278	1.15248e-07	0.163727	0.0307946	1.21307e-12	-0.20655	0.0289224	518	6.28368e-10	3.83005e-08	LncRNA	AC104653.1	Positive
Ex	ENSG00000235026	rs12711818	38622	3860	0.407286	1584	1990	5.60355e-45	0.399088	0.0277827	0.000114841	-0.114095	0.029534	2.64866e-08	0.154022	0.0275951	462	1.22368e-05	0.000267745	LncRNA	DPP10-AS1	Positive
Ex	ENSG00000088205	rs1052628	17644	-42	0.170896	761	835	1.44777e-08	0.211269	0.0371499	4.4349e-06	-0.109027	0.0237	2.5132e-17	0.308095	0.0361159	452	1.13597e-14	1.45404e-12	PCG	DDX18	Positive
Ex	BrainMetalnc.41845	rs2276682	65910	-17496	0.225542	977	1102	3.246e-78	0.598175	0.0308054	9.23179e-19	-0.207151	0.0232327	3.17388e-40	0.403843	0.0298672	561	1.78055e-37	4.5582e-34	LncRNA	MAP3K2	Positive
Ex	ENSG00000240253	rs72988367	5791	-22907	0.284691	1210	1391	7.73387e-69	-0.547558	0.0302444	0.000131641	0.0982965	0.0256682	3.05743e-06	-0.134498	0.0287522	321	0.000981435	0.0131543	Other	-	Positive
Ex	ENSG00000173272	rs7598498	21468	-6375	0.0785919	369	384	1.27549e-124	-1.19042	0.0472632	0.0934234	0.0325924	0.0194203	5.18802e-06	-0.213106	0.0466598	325	0.00168611	0.0207521	PCG	MZT2A	Positive
Ex	ENSG00000287071	rs72857709	-140	-9330	0.445968	1685	2179	2.20162e-73	-0.499685	0.0266503	7.38306e-05	0.122016	0.0307316	6.49412e-07	-0.132466	0.0265511	411	0.000266908	0.00435214	Other	-	Positive
Ex	ENSG00000080345	rs4664423	-86	-98207	0.424069	1622	2072	5.77467e-100	-0.580961	0.0261167	2.78497e-05	0.123553	0.029429	6.34082e-06	-0.11761	0.0259934	424	0.00268851	0.0305865	PCG	RIF1	Positive
Ex	ENSG00000213197	rs3901192	750	57	0.381703	1514	1865	1.21936e-25	-0.302335	0.0285567	2.53723e-11	0.193293	0.0288392	9.89906e-18	-0.247801	0.0286772	443	4.38528e-15	6.23685e-13	Other	-	Positive
Ex	BrainMetalnc.42414	rs3111006	40052	-116939	0.429595	1636	2099	8.23981e-68	-0.479336	0.0266947	5.32746e-07	0.147105	0.0292594	5.18838e-10	-0.16329	0.0261742	455	2.36071e-07	8.16678e-06	LncRNA	KCNJ3	Positive
Ex	ENSG00000196151	rs6735318	54056	3151	0.468686	1755	2290	5.75973e-49	-0.41129	0.0273438	9.31111e-05	0.125544	0.0320722	6.19022e-08	-0.148865	0.0274149	524	3.24368e-05	0.000643707	PCG	WDSUB1	Positive
Ex	BrainMetalnc.42516	rs2556106	239873	178954	0.117888	538	576	2.09856e-08	-0.245016	0.0435791	0.0119117	0.057124	0.0226985	4.36894e-07	-0.221478	0.0437193	517	0.000225874	0.00382939	LncRNA	BAZ2B	Positive
Ex	BrainMetalnc.42546	rs1882364	-143171	-144448	0.289603	1198	1415	3.83739e-43	0.418235	0.0297804	0.000392194	-0.0933029	0.0262809	2.10162e-09	0.179364	0.029832	297	6.2418e-07	1.90226e-05	LncRNA	PSMD14	Positive
Ex	BrainMetalnc.42559	rs4664440	29134	10109	0.331355	1336	1619	2.23749e-37	-0.372838	0.0286932	1.66379e-08	0.157053	0.0277341	1.00097e-13	-0.222388	0.0297152	292	2.92285e-11	2.07847e-09	LncRNA	SLC4A10	Positive
Ex	BrainMetalnc.42573	rs33998987	1534	-6433	0.327057	1360	1598	2.51303e-36	-0.38298	0.0299326	8.71022e-08	0.14793	0.0275574	1.43806e-13	-0.22125	0.0297573	281	4.04094e-11	2.7959e-09	LncRNA	KCNH7	Positive
Ex	BrainMetalnc.42577	rs7604889	-22456	-151375	0.326648	1329	1596	1.52908e-36	-0.374376	0.0291663	3.20668e-06	0.128545	0.0275376	3.4712e-09	-0.173477	0.0292571	355	1.23228e-06	3.35599e-05	LncRNA		Positive
Ex	ENSG00000144362	rs11685651	7267	13	0.305158	1265	1491	4.12166e-15	-0.242064	0.0306338	0.000807526	0.0914646	0.027267	1.04165e-06	-0.147868	0.0302014	742	0.000772907	0.0108122	PCG	PHOSPHO2	Positive
Ex	BrainMetalnc.42719	rs2883387	-43404	-228586	0.136512	616	667	7.32426e-15	0.318121	0.0406386	0.00190708	-0.0704446	0.0226676	3.68113e-08	0.230557	0.0417432	732	2.69459e-05	0.000551852	LncRNA	UBR3	Positive
Ex	BrainMetalnc.42722	rs73019561	140956	92015	0.0589439	280	288	5.72098e-05	-0.243549	0.0604168	0.0247557	0.0488424	0.0217407	3.56182e-06	-0.250454	0.0539057	733	0.00261081	0.0299717	LncRNA	UBR3	Positive
Ex	BrainMetalnc.42723	rs12472910	163951	111500	0.134261	604	656	2.18207e-21	-0.387465	0.0404224	0.000119986	0.0866795	0.0225002	3.18187e-08	-0.226884	0.0408867	716	2.27822e-05	0.000478052	LncRNA	UBR3	Positive
Ex	BrainMetalnc.42788	rs34358700	107750	58817	0.28244	1183	1380	3.45168e-10	-0.196766	0.0312174	7.02293e-06	0.119709	0.0265856	2.28664e-10	-0.189665	0.0297858	546	1.24851e-07	4.70026e-06	LncRNA	DYNC1I2	Positive
Ex	ENSG00000077380	rs10497374	96704	33955	0.28551	1194	1395	5.96792e-36	-0.384448	0.030217	1.52554e-08	0.147059	0.0259003	9.15086e-17	-0.24174	0.0288628	556	5.08788e-14	6.20237e-12	PCG	DYNC1I2	Positive
Ex	ENSG00000228016	rs76443145	58734	-331	0.176013	775	860	2.24957e-109	0.780286	0.0333529	0.00210584	-0.0658591	0.0213954	7.80894e-09	0.196838	0.0339792	713	5.56778e-06	0.000135748	LncRNA	RAPGEF4-AS1	Positive
Ex	BrainMetalnc.42855	rs4972437	-42427	-43095	0.33422	1366	1633	2.73335e-11	0.201009	0.0300401	9.50268e-06	-0.124207	0.02799	1.55695e-09	0.179462	0.0296063	597	9.29498e-07	2.58643e-05	LncRNA	SCRN3	Positive
Ex	BrainMetalnc.42910	rs2689948	112234	11304	0.433483	1639	2118	7.00762e-07	-0.140076	0.0281606	0.0001995	0.115643	0.0310424	2.79925e-06	-0.131861	0.0280791	582	0.00162916	0.0201481	LncRNA	MTX2	Positive
Ex	ENSG00000224577	rs12693095	130311	-193614	0.440033	1659	2150	1.26477e-05	0.123248	0.0281703	0.00112925	-0.102854	0.0315497	1.56584e-06	0.135161	0.0280736	618	0.000967687	0.0130383	LncRNA	LINC01117	Positive
Ex	BrainMetalnc.42940	rs9068	33647	-165516	0.191772	848	937	1.13664e-53	0.543992	0.0344101	3.67951e-05	-0.0963419	0.0233027	7.19361e-10	0.212076	0.0342806	544	3.91333e-07	1.26812e-05	LncRNA	NFE2L2	Positive
Ex	BrainMetalnc.42945	rs9941681	50283	33755	0.212853	926	1040	0.000513983	-0.119955	0.0344895	0.000371435	0.0894763	0.0251015	1.61563e-09	-0.215862	0.0356468	482	7.78734e-07	2.25221e-05	LncRNA	NFE2L2	Positive
Ex	ENSG00000018510	rs12615367	130073	-44205	0.114613	519	560	3.56257e-06	0.203544	0.0438097	0.0105358	-0.05725	0.0223658	4.93706e-07	0.233253	0.0462589	527	0.000260183	0.00427317	PCG	AGPS	Positive
Ex	BrainMetalnc.42996	rs2366911	866	-178866	0.469505	1727	2294	0	-1.11841	0.0162641	1.31988e-16	0.156326	0.0187644	8.734e-16	-0.130702	0.0161402	586	5.11813e-13	5.45933e-11	LncRNA	CCDC141	Positive
Ex	ENSG00000287149	rs2366911	596	-178862	0.469505	1727	2294	0	-1.06192	0.0176738	3.11064e-18	0.178958	0.0203909	1.62509e-17	-0.15053	0.0175392	584	9.49053e-15	1.27872e-12	LncRNA	AC092640.1	Positive
Ex	ENSG00000283839	rs73041376	2119	-2832	0.258903	1076	1265	3.9003e-08	-0.173363	0.0314467	5.67755e-05	0.102679	0.0254601	6.60512e-08	-0.173693	0.0320565	338	2.23253e-05	0.000475864	LncRNA	AC096667.1	Positive
Ex	BrainMetalnc.43123	rs1427148	-60646	-145808	0.207736	910	1015	0.00399032	0.101025	0.0350578	0.0174258	-0.0593352	0.0249389	4.34079e-07	0.177121	0.0349548	347	0.000150625	0.00265932	LncRNA	ZNF804A	Positive
Ex	ENSG00000226747	rs2887741	-54527	-75132	0.246214	1065	1203	1.54921e-276	1.05352	0.0259023	3.63899e-05	-0.0832027	0.0201122	1.58462e-05	0.110604	0.0255715	241	0.00381893	0.0414257	LncRNA	FSIP2-AS2	Positive
Ex	ENSG00000284052	rs75619169	4626	-37544	0.192386	841	940	0.000419684	0.125715	0.0355905	0.00327137	-0.0710079	0.0241201	1.07694e-08	0.213786	0.0372582	426	4.58775e-06	0.000112929	LncRNA	AC006460.2	Positive
Ex	ENSG00000173559	rs10192358	17972	-13684	0.2237	960	1093	8.2957e-06	0.150326	0.0336529	0.000753437	-0.0851672	0.025245	1.40312e-06	0.163944	0.0338965	507	0.000711382	0.0101174	PCG	NABP1	Positive
Ex	BrainMetalnc.43442	rs11684919	14132	-410	0.207941	908	1016	5.57854e-145	-0.837243	0.0304774	5.25001e-10	0.13391	0.0214712	2.84203e-12	-0.21198	0.0301918	337	9.57764e-10	5.57245e-08	LncRNA		Positive
Ex	BrainMetalnc.43447	rs76765694	110040	53968	0.138968	636	679	1.63388e-13	-0.30402	0.0409849	0.0181432	0.0539067	0.0228005	5.20715e-09	-0.243081	0.0414708	367	1.91102e-06	5.09606e-05	LncRNA		Positive
Ex	ENSG00000240344	rs2136600	6715	-11681	0.240483	1035	1175	0	-1.15748	0.0239299	0.000212095	0.0690204	0.0186051	1.2085e-06	-0.113454	0.0233132	430	0.000519654	0.00777962	PCG	PPIL3	Positive
Ex	BrainMetalnc.43491	rs2136600	-9272	-11681	0.240483	1035	1175	8.73451e-99	-0.673831	0.030493	4.56402e-05	0.0968292	0.0237078	7.11424e-08	-0.160564	0.0297072	435	3.0947e-05	0.000618939	LncRNA	PPIL3	Positive
Ex	ENSG00000064012	rs10931936	45762	-8506	0.282644	1175	1381	4.73736e-177	0.810481	0.0262433	5.32851e-12	-0.15471	0.0223215	2.11885e-33	0.324455	0.0265397	525	1.11239e-30	9.49243e-28	PCG	CASP8	Positive
Ex	BrainMetalnc.43513	rs10931936	3337	-4901	0.282644	1175	1381	0	1.19464	0.0200517	0.00830706	-0.0450509	0.0170552	1.16631e-15	0.163477	0.0202782	518	6.04147e-13	6.18647e-11	LncRNA	CASP8	Positive
Ex	ENSG00000155749	rs2080304	33428	-35699	0.379042	1490	1852	1.19918e-19	0.259866	0.0284096	3.6718e-08	-0.160472	0.0290517	1.83478e-14	0.220449	0.0285969	523	9.59589e-12	7.44408e-10	PCG	FLACC1	Positive
Ex	ENSG00000163596	rs115600411	483272	384656	0.129349	595	632	8.37146e-55	-0.650218	0.0406655	0.00924919	0.0566983	0.021767	7.61517e-07	-0.197443	0.0398238	365	0.000277954	0.00447835	PCG	ICA1L	Positive
Ex	ENSG00000023228	rs10166836	59775	15083	0.440647	1683	2153	7.58442e-65	-0.475068	0.0271108	1.06836e-06	0.146721	0.029998	1.78002e-10	-0.17299	0.0270019	718	1.27806e-07	4.74178e-06	PCG	NDUFS1	Positive
Ex	ENSG00000138400	rs28365797	27359	-206	0.186451	829	911	4.50062e-161	0.925835	0.0316988	0.0972739	-0.0348863	0.0210304	1.55823e-06	0.152832	0.0317374	634	0.000987915	0.0131593	PCG	MDH1B	Positive
Ex	ENSG00000118246	rs35535884	23104	-7728	0.240892	1014	1177	0.000161172	-0.122351	0.0323759	4.0748e-05	0.104533	0.0254294	1.42988e-09	-0.192926	0.0317547	628	8.97962e-07	2.52613e-05	PCG	FASTKD2	Positive
Ex	ENSG00000144401	rs2709368	-62920	-108217	0.200368	868	979	3.08561e-102	-0.711619	0.031591	5.16742e-08	0.121674	0.022274	4.38718e-16	-0.262722	0.0321036	574	2.51824e-13	2.80291e-11	PCG	METTL21A	Positive
Ex	ENSG00000188674	rs10804167	19773	-4914	0.243348	1036	1189	2.14608e-71	0.569228	0.0308199	0.0099346	-0.0615199	0.0238438	1.82556e-06	0.145236	0.0303619	478	0.000872617	0.0120078	PCG	C2orf80	Positive
Ex	BrainMetalnc.43775	rs55817320	4188	-2955	0.498567	1823	2436	0.0143667	-0.069176	0.0282383	8.06022e-08	0.187241	0.0347889	5.75418e-10	-0.172311	0.0276932	390	2.24413e-07	7.86982e-06	LncRNA	UNC80	Positive
Ex	BrainMetalnc.43784	rs58656711	58987	-106141	0.424273	1639	2073	1.93434e-10	0.179274	0.0280393	2.07001e-20	-0.289429	0.0309829	1.17466e-32	0.338041	0.0279911	511	6.00252e-30	3.84161e-27	LncRNA	LANCL1	Positive
Ex	ENSG00000234281	rs2370954	72002	-72485	0.424887	1638	2076	0.000166672	0.107804	0.0285901	1.57096e-09	-0.191882	0.0316629	7.57817e-15	0.223387	0.0285527	503	3.81182e-12	3.25275e-10	LncRNA	LANCL1-AS1	Positive
Ex	BrainMetalnc.43812	rs1219984	-30614	-32287	0.317642	1321	1552	5.92587e-32	0.361699	0.0303058	0.00323636	-0.080497	0.0273124	7.03727e-07	0.15381	0.0309266	461	0.000324418	0.00519069	LncRNA	SPAG16	Positive
Ex	BrainMetalnc.43833	rs11651	36063	12523	0.3377	1371	1650	2.78602e-253	0.912352	0.0237272	1.19092e-06	-0.107808	0.0221399	1.10453e-12	0.172696	0.0241376	650	7.17944e-10	4.27427e-08	LncRNA	ATIC	Positive
Ex	ENSG00000231672	rs12623849	-40598	-513172	0.104585	483	511	6.94182e-08	-0.249834	0.0461856	0.0617403	0.0412775	0.0220851	3.75352e-06	-0.215778	0.0465519	736	0.00276259	0.0311552	LncRNA	DIRC3	Positive
Ex	ENSG00000182698	rs11892648	1267	-4503	0.290831	1211	1421	0	-1.07094	0.0228011	1.50105e-07	0.104132	0.0197674	2.72169e-20	-0.20419	0.0219287	457	1.24381e-17	2.65347e-15	PCG	RESP18	Positive
Ex	BrainMetalnc.44061	rs144738646	162217	25160	0.113999	523	557	3.12944e-08	0.245836	0.0442787	0.0117519	-0.056001	0.0222102	1.46365e-08	0.259295	0.04561	647	9.46982e-06	0.000212656	LncRNA		Positive
Ex	BrainMetalnc.44069	rs6713495	25618	11481	0.138559	627	677	3.31116e-12	0.284829	0.0406938	0.0480877	-0.045199	0.0228556	2.26331e-06	0.19663	0.0414856	617	0.00139646	0.0178747	LncRNA		Positive
Ex	BrainMetalnc.44228	rs13432474	-38365	-76346	0.384364	1526	1878	2.20008e-06	-0.139287	0.0293513	6.09132e-05	0.121454	0.0302405	4.51046e-08	-0.16438	0.0299582	624	2.81452e-05	0.00057184	LncRNA	AGFG1	Positive
Ex	ENSG00000123977	rs67976735	-11172	-64462	0.100082	464	489	1.88704e-48	-0.678924	0.0453966	0.000479402	0.0745366	0.021316	3.84358e-06	-0.211748	0.0457312	605	0.00232536	0.027688	PCG	DAW1	Positive
Ex	ENSG00000238062	rs4973353	-40792	-52456	0.333402	1365	1629	1.39113e-27	-0.327435	0.0297196	0.000884497	0.0910019	0.027336	3.98962e-06	-0.140925	0.030487	744	0.00296828	0.0331825	LncRNA	SPATA3-AS1	Positive
Ex	ENSG00000237412	rs733603	2537	-2791	0.173557	773	848	2.43626e-87	0.717669	0.0347765	0.000533146	-0.0755318	0.0217787	7.36492e-07	0.172028	0.0346519	725	0.000533957	0.00794726	PCG	PRSS56	Positive
Ex	ENSG00000085978	rs1045095	84850	-773	0.312526	1289	1527	5.21198e-21	0.28623	0.0301557	0.000290831	-0.0997198	0.0274817	1.54806e-08	0.173607	0.0305897	830	1.28489e-05	0.000278755	PCG	ATG16L1	Positive
Ex	ENSG00000124839	rs13404216	8293	-18999	0.31314	1297	1530	1.84782e-128	0.699357	0.0272905	9.0868e-09	-0.140023	0.0242799	1.37654e-14	0.208881	0.0269652	834	1.14804e-11	8.64403e-10	PCG	RAB17	Positive
Ex	ENSG00000132330	rs4663275	-75713	-114202	0.212444	926	1038	3.89656e-51	0.509207	0.0330668	5.40993e-05	-0.0966625	0.0239007	4.57538e-11	0.213688	0.0323075	921	4.21392e-08	1.68557e-06	PCG	SCLY	Positive
Ex	BrainMetalnc.44570	rs1053025	500	-781	0.477691	1770	2334	4.42034e-72	-0.492634	0.0265335	6.65682e-07	0.155472	0.0311926	2.98485e-12	-0.18652	0.026592	1082	3.22961e-09	1.68731e-07	LncRNA	HDAC4	Positive
Ex	BrainMetalnc.44612	rs6752251	-1934	-18187	0.432665	1637	2114	5.04907e-92	-0.548608	0.0258256	1.46092e-10	0.188618	0.0293014	8.91153e-16	-0.209111	0.0258308	1174	1.04621e-12	9.91966e-11	LncRNA	NDUFA10	Positive
Ex	ENSG00000144504	rs3821348	44614	-45173	0.155137	701	758	5.27199e-38	-0.498535	0.038022	9.34212e-05	0.0877655	0.0224258	4.5987e-11	-0.255134	0.0385783	1106	5.08616e-08	2.00317e-06	PCG	ANKMY1	Positive
Ex	ENSG00000122085	rs7599243	53722	23559	0.145518	654	711	2.39899e-53	-0.603859	0.0383229	0.124709	0.0342558	0.0223044	2.39528e-06	-0.180182	0.0381087	955	0.00228749	0.0273726	PCG	MTERF4	Positive
Ex	BrainMetalnc.44710	rs6720490	-20961	-22615	0.216128	935	1056	1.80129e-92	-0.673249	0.0316077	0.0484859	0.0449125	0.0227512	1.91443e-06	-0.152206	0.0318834	595	0.00113909	0.0148779	LncRNA	ATG4B	Positive
Ex	ENSG00000168395	rs1133811	38820	-3573	0.471347	1741	2303	4.34402e-37	-0.351893	0.0271951	0.000698331	0.110642	0.0325937	4.40603e-07	-0.137788	0.0272078	591	0.000260396	0.00427317	PCG	ING5	Positive
Ex	ENSG00000180902	rs7608524	36219	2010	0.371469	1478	1815	7.68547e-115	-0.637174	0.0264973	5.32205e-06	0.1191	0.0261081	7.53666e-10	-0.166357	0.0269229	533	4.01704e-07	1.26958e-05	PCG	D2HGDH	Positive
Ex	BrainMetalnc.44720	rs10755057	16454	15507	0.498567	1831	2436	7.73739e-43	0.383596	0.0274189	8.29885e-07	-0.172692	0.0349507	3.69292e-10	0.174628	0.0277521	526	1.94248e-07	6.90659e-06	LncRNA	D2HGDH	Positive
Ex	BrainMetalnc.44722	rs34667857	6045	-4855	0.420794	1614	2056	1.1841e-188	0.77268	0.0240893	0.000232647	-0.0976017	0.026478	4.94509e-07	0.122227	0.0242417	516	0.000255167	0.00424173	LncRNA	NEU4	Positive
Ex	BrainMetalnc.44744	rs10193294	9931	8825	0.471142	1715	2302	4.91132e-263	0.850396	0.021591	1.41909e-05	-0.110863	0.0254872	1.87998e-08	0.120862	0.0214236	393	7.38832e-06	0.000171946	LncRNA		Positive
Ex	ENSG00000261186	rs10193294	9931	8825	0.471142	1715	2302	1.97793e-263	0.850877	0.0215825	1.53184e-05	-0.110388	0.0254772	1.68647e-08	0.12122	0.0214152	393	6.62784e-06	0.000157104	LncRNA	LINC01238	Positive
Ex	ENSG00000240859	rs7786461	-4364	-10280	0.103357	473	505	1.59911e-66	-0.775538	0.0436454	0.0124269	0.0522994	0.020906	2.96941e-08	-0.242395	0.0435861	900	2.67247e-05	0.000496441	LncRNA	AC093627.4	Positive
Ex	ENSG00000188191	rs4720493	159143	-19310	0.13201	604	645	1.43303e-06	-0.204252	0.0422676	0.0270174	0.0503941	0.0227759	4.78934e-06	-0.193108	0.0421255	1206	0.00577594	0.0474571	PCG	PRKAR1B	Positive
Ex	BrainMetalnc.67751	rs56408515	41930	38537	0.420589	1604	2055	1.16696e-85	-0.540566	0.0264775	0.00187733	0.0895024	0.0287569	1.0217e-06	-0.129201	0.0263681	1232	0.00125874	0.0137896	LncRNA	DNAAF5	Positive
Ex	ENSG00000146540	rs10270632	-34643	-175917	0.27016	1142	1320	1.47005e-26	-0.338179	0.0313344	0.00065214	0.0890334	0.0260838	7.65822e-08	-0.171906	0.0318846	1355	0.000103769	0.00165739	PCG	C7orf50	Positive
Ex	BrainMetalnc.67783	rs2960830	635	-2572	0.381294	1508	1863	5.23727e-251	0.887918	0.0232239	3.51024e-07	-0.121702	0.0238264	4.90803e-13	0.168775	0.0232234	1189	5.83565e-10	3.43901e-08	LncRNA	ZFAND2A	Positive
Ex	ENSG00000229043	rs6945392	-3456	-8578	0.384159	1518	1877	0	0.99099	0.021639	0.000159748	-0.0850275	0.0224862	3.87093e-09	0.128374	0.0217169	1189	4.60254e-06	0.000102378	LncRNA	ZFAND2A-DT	Positive
Ex	ENSG00000176349	rs11762834	17419	6074	0.375972	1507	1837	6.25854e-32	-0.346033	0.0290049	0.000138883	0.110783	0.0290296	8.02279e-07	-0.14057	0.0284114	971	0.000779013	0.00905668	LncRNA	AC104129.1	Positive
Ex	ENSG00000157927	rs749404	-6945	-93606	0.126484	570	618	1.13405e-67	0.7136	0.0397856	0.10301	-0.0349192	0.0214091	6.87197e-07	0.193307	0.038832	1315	0.000903664	0.0102276	PCG	RADIL	Positive
Ex	ENSG00000196204	rs12535548	23369	-43318	0.105403	485	515	1.23342e-25	-0.477088	0.0450676	0.0192845	0.0513191	0.0219168	2.66439e-07	-0.233529	0.0452551	1325	0.000353032	0.00482665	LncRNA	RNF216P1	Positive
Ex	BrainMetalnc.67953	rs73043451	-3166	-36804	0.396643	1559	1938	5.2197e-65	0.483893	0.0275767	0.00156749	-0.0927585	0.0293033	2.89688e-06	0.130458	0.0278222	1123	0.0032532	0.029573	LncRNA	FBXL18	Positive
Ex	ENSG00000122674	rs2711224	923516	895699	0.461727	1738	2256	1.65755e-159	0.718054	0.0247259	0.00106272	-0.0943228	0.0287806	3.01098e-06	0.116025	0.0247862	1065	0.0032067	0.0293061	PCG	CCZ1	Positive
Ex	ENSG00000122512	rs4720658	48886	10705	0.182153	814	890	2.7682e-109	0.785798	0.0336041	0.0316567	-0.0464571	0.0216084	1.45645e-06	0.171241	0.0354603	1107	0.00161229	0.0168648	PCG	PMS2	Positive
Ex	ENSG00000187953	rs2079819	-688851	-732585	0.169054	757	826	4.37434e-115	-0.824113	0.0342301	0.0174812	0.0505567	0.0212598	1.62342e-06	-0.171879	0.0357542	961	0.00156011	0.0166639	Other	-	Positive
Ex	ENSG00000272894	rs28553401	-26024	-40436	0.261768	1102	1279	5.18803e-26	0.33434	0.0313329	1.28599e-05	-0.111636	0.0255375	3.61614e-09	0.182916	0.0308845	1180	4.26705e-06	9.72317e-05	LncRNA	MIOS-DT	Positive
Ex	BrainMetalnc.68079	rs37960	-7227	-13445	0.377405	1496	1844	0.00014683	-0.111131	0.0292267	3.9595e-06	0.140164	0.0303119	1.66786e-09	-0.178153	0.029445	1208	2.01478e-06	4.84965e-05	LncRNA	GLCCI1	Positive
Ex	ENSG00000233264	rs2079855	87800	85884	0.363692	1455	1777	1.36551e-06	-0.14283	0.0294979	0.000222433	0.11183	0.0302438	4.09575e-07	-0.152978	0.0301237	1191	0.000487803	0.00631558	Other	-	Positive
Ex	BrainMetalnc.68089	rs9472	609	-2008	0.456815	1718	2232	4.38861e-93	-0.557737	0.0260887	1.3012e-07	0.15976	0.0301757	1.21718e-10	-0.169979	0.026291	1261	1.53487e-07	4.94922e-06	LncRNA	ICA1	Positive
Ex	ENSG00000229618	rs1942143	997585	-28183	0.331764	1358	1621	0.00222543	0.0929255	0.0303517	0.000292028	-0.102176	0.028167	4.17227e-08	0.163845	0.0297851	1424	5.94132e-05	0.00101537	LncRNA	AC011287.1	Positive
Ex	BrainMetalnc.68258	rs2286222	7065	3934	0.376791	1479	1841	1.6457e-17	-0.24448	0.0284908	1.89187e-08	0.165027	0.0292577	5.5465e-12	-0.192962	0.0278637	931	5.16379e-09	2.2628e-07	LncRNA	ANKMY2	Positive
Ex	ENSG00000196683	rs2270105	10220	-4	0.318461	1293	1556	8.89372e-174	-0.784296	0.0256781	0.00115891	0.0769024	0.0236429	5.4984e-07	-0.129798	0.0258487	802	0.000440972	0.00579708	PCG	TOMM7	Positive
Ex	ENSG00000230042	rs1624451	93638	92975	0.404216	1580	1975	0.000235248	-0.106534	0.0289236	3.59473e-07	0.154524	0.0302791	3.93005e-12	-0.204989	0.0293899	652	2.5624e-09	1.28798e-07	Other	-	Positive
Ex	BrainMetalnc.68409	rs1881200	-25223	-36408	0.389685	1534	1904	0	-0.996464	0.0212207	1.76831e-11	0.145863	0.0215903	3.52581e-14	-0.162874	0.0213661	648	2.28473e-11	1.56184e-09	LncRNA	NUPL2	Positive
Ex	ENSG00000225792	rs2698713	122	-7269	0.283668	1191	1386	1.74781e-102	0.650228	0.0288268	0.00959473	-0.0631866	0.0243761	3.10989e-06	0.13609	0.0291145	625	0.00194368	0.0194254	LncRNA	AC004540.2	Positive
Ex	BrainMetalnc.68489	rs1229663	1319	-142399	0.379042	1501	1852	0	-1.2007	0.0164772	1.12486e-27	0.182385	0.0165241	4.12464e-14	-0.12487	0.0164254	656	2.70576e-11	1.77852e-09	LncRNA		Positive
Ex	ENSG00000280255	rs1229663	-139345	-142015	0.379042	1501	1852	0	-1.19777	0.016607	2.19084e-25	0.175363	0.0166542	3.52191e-12	-0.115726	0.0165547	589	2.07441e-09	1.07429e-07	Other	-	Positive
Ex	BrainMetalnc.68548	rs73081523	220430	-192208	0.329308	1349	1609	5.34854e-30	-0.343353	0.0297728	0.00094791	0.0923064	0.0278906	4.34508e-08	-0.158371	0.028828	874	3.7976e-05	0.000676052	LncRNA	AC006978.2	Positive
Ex	ENSG00000244480	rs1074373	54002	52610	0.311707	1296	1523	6.32654e-64	0.510226	0.0293453	0.000538492	-0.091805	0.0264915	4.68181e-06	0.134929	0.0294033	637	0.00298231	0.0276998	Other	-	Positive
Ex	ENSG00000226468	rs62466415	21679	20884	0.138354	632	676	1.76817e-165	1.05384	0.0355141	0.00427324	-0.05566	0.019462	1.77285e-07	0.196995	0.0376169	536	9.50247e-05	0.00155681	Other	-	Positive
Ex	BrainMetalnc.68615	rs12672224	85911	-199807	0.335653	1379	1640	0.017132	-0.072706	0.0304784	0.000175317	0.106869	0.0284381	1.17047e-08	-0.174385	0.0304675	654	7.65487e-06	0.000159539	LncRNA		Positive
Ex	ENSG00000273014	rs7804506	-210648	-211119	0.358985	1457	1754	3.64654e-07	-0.153269	0.0300493	0.00334264	0.0859455	0.0292608	1.02349e-05	-0.132815	0.030039	552	0.00564967	0.0466439	LncRNA	AC018645.3	Positive
Ex	ENSG00000281332	rs55850397	17916	15271	0.194638	850	951	1.99547e-10	0.225375	0.0352764	0.000618154	-0.0821989	0.0239787	1.91586e-07	0.19007	0.0363954	555	0.00010633	0.00168258	LncRNA	LINC00997	Positive
Ex	ENSG00000122642	rs41276006	-468220	-517746	0.201596	872	985	7.55332e-09	0.200915	0.0346491	0.00487159	-0.0682977	0.0242364	3.02991e-07	0.180683	0.0351803	571	0.000173008	0.00263992	PCG	FKBP9	Positive
Ex	ENSG00000006715	rs3801143	32911	-176509	0.28203	1177	1378	2.00977e-24	0.317818	0.0308278	0.000132555	-0.100622	0.0262871	2.49325e-12	0.215232	0.0305737	669	1.66798e-09	8.90807e-08	PCG	VPS41	Positive
Ex	ENSG00000188185	rs4723906	67241	7579	0.468686	1755	2290	0.00023611	-0.10505	0.0285279	0.000302971	0.122376	0.0338246	7.07274e-06	-0.130538	0.0290004	389	0.0027513	0.025835	LncRNA	LINC00265	Positive
Ex	BrainMetalnc.68994	rs217358	168	-989	0.443717	1679	2168	2.97942e-26	0.298545	0.0278379	0.000157754	-0.119723	0.0316354	1.2566e-06	0.135578	0.0279043	484	0.000608192	0.00734916	LncRNA		Positive
Ex	ENSG00000287574	rs217358	168	-989	0.443717	1679	2168	3.19768e-26	0.298359	0.0278383	0.000156999	-0.119763	0.0316359	1.21041e-06	0.135789	0.0279047	484	0.000585837	0.00720285	LncRNA	AC004938.2	Positive
Ex	ENSG00000232956	rs10234808	104971	101033	0.358371	1424	1751	0.000164476	0.11063	0.0293136	0.000766386	-0.0984203	0.0292143	9.3153e-06	0.131954	0.0297068	538	0.00501163	0.042066	LncRNA	SNHG15	Positive
Ex	BrainMetalnc.69099	rs13228276	31164	12198	0.406877	1584	1988	6.02968e-28	0.314165	0.0283127	0.000160233	-0.116834	0.0309039	8.48592e-07	0.137981	0.0279505	644	0.000546493	0.0069182	LncRNA	UPP1	Positive
Ex	BrainMetalnc.69184	rs17135330	-35489	-44501	0.115432	521	564	1.10541e-41	-0.57931	0.0420258	0.00152856	0.0680753	0.0214559	2.98229e-08	-0.239069	0.0429939	607	1.81025e-05	0.000359734	LncRNA		Positive
Ex	BrainMetalnc.69197	rs2009456	5601	-1292	0.274253	1149	1340	1.09142e-154	-0.781757	0.0274063	2.65177e-06	0.109381	0.0232369	4.38086e-10	-0.164852	0.0263113	560	2.45328e-07	6.98776e-06	LncRNA		Positive
Ex	ENSG00000178665	rs2908547	220952	165878	0.209374	927	1023	8.50351e-05	0.139214	0.035366	0.00474765	-0.0705486	0.0249617	1.84628e-07	0.182504	0.0349003	523	9.65604e-05	0.00155681	PCG	ZNF713	Positive
Ex	ENSG00000146733	rs10260993	-194449	-235002	0.212853	909	1040	6.04964e-132	0.782671	0.0300779	0.0099765	-0.055799	0.0216387	4.73841e-08	0.164916	0.0301043	499	2.36447e-05	0.000448986	PCG	PSPH	Positive
Ex	ENSG00000106153	rs2538047	-3870	-8773	0.489971	1806	2394	1.02381e-140	0.670312	0.024825	9.37221e-11	-0.194506	0.0298993	3.08443e-17	0.209849	0.0246699	467	1.44043e-14	1.29563e-12	PCG	CHCHD2	Positive
Ex	ENSG00000185290	rs816417	4733	2997	0.356734	1429	1743	3.21093e-107	0.621343	0.0268575	0.000102136	-0.104176	0.0267676	1.20867e-08	0.153959	0.0269248	473	5.717e-06	0.000123675	PCG	NUPR2	Positive
Ex	ENSG00000214652	rs1852104	204645	164740	0.404216	1577	1975	7.94526e-19	-0.255772	0.0286306	0.000667842	0.102471	0.0300779	1.33156e-05	-0.125754	0.0288176	323	0.00430095	0.0375017	PCG	ZNF727	Positive
Ex	BrainMetalnc.69374	rs4718070	54999	-50416	0.277118	1171	1354	1.35257e-13	0.234938	0.0315631	6.01107e-05	-0.104088	0.0258964	1.36458e-11	0.220042	0.0323871	317	4.32571e-09	1.94543e-07	LncRNA		Positive
Ex	BrainMetalnc.69395	rs35065007	68274	-70880	0.48772	1792	2383	0	1.16331	0.0157433	6.43615e-11	-0.122152	0.0186134	8.01092e-27	0.164786	0.0151864	308	2.46736e-24	7.02787e-22	LncRNA	ZNF273	Positive
Ex	ENSG00000234338	rs4718146	26704	25102	0.488334	1794	2386	1.5555e-16	-0.231786	0.0278891	1.64632e-05	0.142863	0.0330947	1.49313e-09	-0.163594	0.0269581	290	4.33009e-07	1.15627e-05	Other	-	Positive
Ex	ENSG00000189316	rs7796284	-10688	-12261	0.494883	1812	2418	7.47395e-10	-0.172667	0.0279381	2.30585e-10	0.213726	0.0335715	7.97119e-16	-0.22056	0.0271983	263	2.09642e-13	1.70609e-11	LncRNA	AC073349.1	Positive
Ex	ENSG00000213462	rs1806670	104163	88457	0.372288	1481	1819	1.7886e-305	0.959783	0.0221122	1.78797e-12	-0.1571	0.0221676	2.20813e-18	0.194063	0.0220124	255	5.63072e-16	6.41527e-14	PCG	ERV3-1	Positive
Ex	BrainMetalnc.69472	rs1440950902	30969	-79664	0.247032	1061	1207	6.19472e-08	0.178932	0.0329528	0.000208621	-0.0938507	0.0252697	6.57e-07	0.163311	0.0327485	523	0.000343611	0.00473574	LncRNA		Positive
Ex	ENSG00000067601	rs113144414	-100917	-115795	0.249284	1070	1218	1.24679e-13	0.243931	0.032723	0.000478922	-0.0884808	0.0253019	3.65299e-06	0.151451	0.0326341	532	0.00194339	0.0194254	Other	-	Positive
Ex	ENSG00000106610	rs62466449	44097	-16232	0.114204	522	558	3.29865e-84	0.830762	0.0410776	0.0301188	-0.0454412	0.0209426	8.20149e-08	0.217755	0.0404821	555	4.55183e-05	0.000793783	Other	-	Positive
Ex	ENSG00000176410	rs35459363	22785	20250	0.457839	1739	2237	0.0304341	-0.0621759	0.02871	8.46589e-10	0.201729	0.0327464	2.5506e-14	-0.217828	0.0284161	400	1.02024e-11	7.58083e-10	PCG	DNAJC30	Positive
Ex	BrainMetalnc.69682	rs4301345	11624	-33315	0.266885	1137	1304	1.15931e-279	1.02627	0.0250497	0.00161893	-0.0652107	0.0206624	8.26585e-08	0.132191	0.0245816	382	3.15755e-05	0.000580243	LncRNA	TMEM270	Positive
Ex	ENSG00000165171	rs4301345	11015	3089	0.266885	1137	1304	0	1.09619	0.0237701	0.00148825	-0.0623613	0.0196069	1.20179e-10	0.150854	0.0233259	380	4.56679e-08	1.69666e-06	PCG	METTL27	Positive
Ex	BrainMetalnc.69738	rs2529287	311612	-175117	0.26402	1079	1290	3.07754e-43	-0.418313	0.0297501	2.5799e-05	0.107367	0.025468	1.33933e-10	-0.190898	0.0295941	517	6.92433e-08	2.41504e-06	LncRNA	GTF2IRD2B	Positive
Ex	ENSG00000274523	rs6460092	27083	-6690	0.42632	1640	2083	2.10321e-132	-0.665627	0.0255291	0.00159365	0.0904009	0.0286023	8.80765e-06	-0.115349	0.0258976	379	0.0033381	0.0301842	PCG	RCC1L	Positive
Ex	BrainMetalnc.69781	rs794375	159277	-25733	0.415882	1602	2032	3.76542e-10	0.178761	0.0284227	3.23036e-06	-0.145241	0.0311246	1.10422e-09	0.174956	0.0285994	375	4.14084e-07	1.12328e-05	LncRNA	POM121C	Positive
Ex	ENSG00000272391	rs236671	15352	-54157	0.410561	1594	2006	8.85278e-102	0.591198	0.0263111	1.2806e-06	-0.137817	0.0283871	7.24322e-11	0.171876	0.026262	355	2.57134e-08	1.04629e-06	PCG	POM121C	Positive
Ex	ENSG00000127957	rs10953514	-56711	-77120	0.41097	1593	2008	7.15565e-35	0.350285	0.0279904	1.08998e-05	-0.133339	0.0302513	2.05239e-08	0.157384	0.0279733	335	6.8755e-06	0.000145064	Other	-	Positive
Ex	ENSG00000205485	rs17718068	28917	-49705	0.303316	1242	1482	7.66136e-07	0.148686	0.0299969	5.52134e-11	-0.179762	0.0272953	4.35337e-22	0.289028	0.0296236	583	2.53801e-19	3.94315e-17	Other	-	Positive
Ex	ENSG00000146707	rs3851929	-32013	-47710	0.21449	922	1048	3.36442e-256	-1.04502	0.0269807	0.00800343	0.052132	0.019642	2.9047e-06	-0.130515	0.0278376	549	0.00159468	0.0168497	PCG	POMZP3	Positive
Ex	BrainMetalnc.69833	rs74783981	147661	142867	0.0923045	427	451	1.08576e-14	0.375669	0.0483041	0.0493572	-0.0423888	0.0215558	1.16958e-06	0.247126	0.0507132	519	0.00060701	0.00734916	LncRNA		Positive
Ex	ENSG00000213542	rs72508681	-6648	-7441	0.218993	958	1070	4.19104e-12	-0.238316	0.0342135	9.50387e-05	0.0981091	0.0250955	3.96545e-10	-0.211163	0.0336182	527	2.08979e-07	6.26571e-06	Other	-	Positive
Ex	ENSG00000135205	rs2080164	170	-206929	0.401555	1548	1962	9.76915e-05	-0.111094	0.0284657	0.000156476	0.113196	0.0298947	7.98198e-09	-0.163932	0.028317	616	4.9169e-06	0.000107731	PCG	CCDC146	Positive
Ex	ENSG00000214293	rs67074819	282756	244148	0.139582	634	682	2.07153e-113	-0.889164	0.037239	0.338091	0.019844	0.0207111	4.0316e-06	-0.172125	0.0372542	764	0.00308014	0.0283009	LncRNA	APTR	Positive
Ex	BrainMetalnc.69870	rs2005730	31691	-31984	0.102129	475	499	0.000237874	0.174938	0.0475316	0.125177	-0.0343098	0.0223673	2.51141e-06	0.220929	0.0468229	808	0.00202922	0.0201624	LncRNA	MAGI2	Positive
Ex	BrainMetalnc.69885	rs111452443	-58938	-67513	0.0730659	345	357	3.08708e-13	0.399094	0.0544378	0.0127084	-0.0540413	0.0216713	4.91069e-09	0.296795	0.0505496	731	3.58971e-06	8.40386e-05	LncRNA	MAGI2	Positive
Ex	ENSG00000234456	rs55652806	6390	-11941	0.149816	680	732	1.12325e-08	0.225506	0.0393504	1.43782e-07	-0.121672	0.023062	1.09859e-19	0.351128	0.0383457	608	6.67944e-17	8.7809e-15	LncRNA	MAGI2-AS3	Positive
Ex	BrainMetalnc.69892	rs34247718	129601	-37183	0.375767	1494	1836	5.61606e-07	-0.147413	0.0293806	2.16778e-05	0.126029	0.0296178	3.70679e-07	-0.150476	0.0295199	579	0.000214623	0.00318949	LncRNA		Positive
Ex	BrainMetalnc.69928	rs37090	-13093	-19018	0.416905	1607	2037	2.2693e-47	-0.406376	0.0275066	5.91767e-07	0.149657	0.0298885	2.18216e-09	-0.165959	0.027631	569	1.24165e-06	3.03139e-05	LncRNA	CACNA2D1	Positive
Ex	BrainMetalnc.69953	rs6467919	744	-2868	0.483013	1772	2360	3.82618e-28	0.305531	0.0274292	0.00108186	-0.105024	0.0320955	7.83906e-06	0.121491	0.0271237	578	0.00453097	0.0393068	LncRNA	PCLO	Positive
Ex	BrainMetalnc.69984	rs724224	1059772	-132282	0.476054	1792	2326	0.000364503	-0.103312	0.0289426	0.000796218	0.117365	0.0349474	7.36506e-06	-0.130453	0.0290375	490	0.00360888	0.032291	LncRNA	GRM3	Positive
Ex	BrainMetalnc.69993	rs802054	559943	555267	0.0861645	400	421	0.0277113	0.111043	0.0504131	0.111068	-0.0354133	0.0222168	1.56848e-05	0.206159	0.0476387	317	0.0049721	0.0420659	LncRNA	GRM3	Positive
Ex	ENSG00000261462	rs875777	6525	4782	0.188088	836	919	0.00105213	0.119672	0.0364838	0.0012058	-0.0803519	0.0247899	1.09225e-08	0.2108	0.0367533	292	3.18938e-06	7.57035e-05	LncRNA	AC004023.1	Positive
Ex	BrainMetalnc.70023	rs4728725	-76192	-77829	0.374539	1468	1830	2.39301e-08	0.160289	0.0286265	2.8647e-06	-0.135989	0.0289875	1.93697e-12	0.202211	0.0285787	360	6.9731e-10	3.97234e-08	LncRNA	ADAM22	Positive
Ex	ENSG00000157214	rs13231077	37190	-33357	0.193614	869	946	5.07238e-29	-0.407449	0.0359727	0.0269532	0.0537818	0.0242968	1.31414e-05	-0.160578	0.0367733	456	0.00599246	0.0490005	PCG	STEAP2	Positive
Ex	ENSG00000127995	rs17166357	50739	2939	0.1623	730	793	7.43156e-49	-0.555085	0.0369491	0.000326824	0.0821848	0.0228406	5.37963e-10	-0.232844	0.0373575	434	2.33476e-07	6.87949e-06	PCG	CASD1	Positive
Ex	BrainMetalnc.70230	rs2690295	11911	-13474	0.459885	1731	2247	2.93878e-93	0.56109	0.0262183	1.24805e-07	-0.16525	0.0311672	1.74464e-12	0.186302	0.0262754	461	8.04278e-10	4.43391e-08	LncRNA	DYNC1I1	Positive
Ex	BrainMetalnc.70239	rs7788336	-43108	-50318	0.186451	829	911	3.33237e-60	-0.584507	0.0347345	0.000675516	0.0776605	0.0228164	8.18515e-08	-0.187356	0.0348285	499	4.08439e-05	0.00071961	LncRNA	SLC25A13	Positive
Ex	ENSG00000070669	rs10231594	9414	-11451	0.0693819	321	339	1.15671e-21	-0.521162	0.0539887	0.0015795	0.0674256	0.0213155	8.8761e-06	-0.237904	0.0534335	543	0.00481972	0.0411845	PCG	ASNS	Positive
Ex	ENSG00000180535	rs6977321	-65892	-69076	0.457429	1736	2235	0	0.952487	0.0215771	0.000805821	-0.0836318	0.0249276	1.44343e-06	0.104535	0.0216387	508	0.000733264	0.00870242	PCG	BHLHA15	Positive
Ex	ENSG00000160917	rs11772470	144551	126100	0.13774	629	673	5.91515e-67	0.697618	0.0391217	0.0574548	-0.0410228	0.0215826	6.79297e-06	0.178278	0.0395305	348	0.00236395	0.0229545	PCG	CPSF4	Positive
Ex	ENSG00000066923	rs2293479	-71228	-114211	0.287352	1203	1404	8.10165e-84	0.588884	0.0291925	0.000825847	-0.0858077	0.0256283	8.76836e-06	0.128099	0.0287541	348	0.00305139	0.0281883	PCG	STAG3	Positive
Ex	ENSG00000085514	rs11771936	-27798	-54436	0.191363	841	935	6.74087e-296	1.15919	0.0272725	0.000868712	-0.0611475	0.0183403	1.04174e-08	0.160105	0.0278751	366	3.81276e-06	8.80541e-05	PCG	PILRA	Positive
Ex	BrainMetalnc.70443	rs1052897	7665	-3049	0.154318	697	754	3.28071e-182	1.04934	0.0334015	0.00263898	-0.0602035	0.0200009	2.11838e-08	0.186212	0.0331298	450	9.53271e-06	0.000191664	LncRNA	TFR2	Positive
Ex	BrainMetalnc.70494	rs13226176	29689	-212635	0.494679	1816	2417	0	-1.1336	0.0166763	1.8433e-23	0.207039	0.0205294	1.02257e-24	-0.177614	0.0171161	632	6.46265e-22	1.38058e-19	LncRNA		Positive
Ex	BrainMetalnc.70495	rs4568540	27141	-143297	0.495088	1817	2419	5.82215e-129	-0.636855	0.0247963	5.40821e-25	0.318691	0.0305248	6.07866e-33	-0.307716	0.0253597	631	3.83564e-30	3.27755e-27	LncRNA	COL26A1	Positive
Ex	ENSG00000160999	rs803071	-779	-34575	0.366762	1440	1792	2.39568e-150	0.707361	0.0252124	6.30297e-05	-0.101073	0.0252167	2.12638e-07	0.131366	0.0252489	451	9.58999e-05	0.00155681	PCG	SH2B2	Positive
Ex	BrainMetalnc.70585	rs55796396	103025	-49375	0.147564	668	721	1.49617e-39	0.519952	0.0388075	0.0133913	-0.0556713	0.0224935	3.31908e-06	0.180475	0.0387218	743	0.00246608	0.0238109	LncRNA	SRPK2	Positive
Ex	ENSG00000128536	rs4727635	27490	-132146	0.273844	1158	1338	7.22653e-70	0.54873	0.0300639	0.000433195	-0.0900646	0.0255588	9.39499e-07	0.149149	0.0303363	816	0.000766631	0.00903567	PCG	CDHR3	Positive
Ex	ENSG00000233705	rs73419448	-97337	-109281	0.0528039	253	258	6.24751e-12	0.437635	0.0633517	0.0316879	-0.045274	0.0210619	2.77227e-10	0.389163	0.0614063	526	1.45821e-07	4.79247e-06	LncRNA	SLC26A4-AS1	Positive
Ex	BrainMetalnc.70650	rs73419448	-97992	-110005	0.0528039	253	258	6.2867e-21	0.594912	0.0628111	0.0269987	-0.0462097	0.0208822	1.20509e-10	0.393715	0.0608823	526	6.33877e-08	2.30489e-06	LncRNA	SLC26A4	Positive
Ex	BrainMetalnc.70707	rs6974167	62447	-84525	0.307	1268	1500	9.54678e-05	-0.120131	0.0307373	0.00032111	0.0987348	0.0274051	7.62203e-07	-0.151535	0.0305654	473	0.000360522	0.00485144	LncRNA	DOCK4	Positive
Ex	ENSG00000181016	rs6970738	-136490	-146534	0.21142	929	1033	5.04243e-12	0.241241	0.034766	0.0006535	-0.0861859	0.0252538	6.70244e-07	0.172349	0.0345881	471	0.000315685	0.00442217	PCG	LSMEM1	Positive
Ex	ENSG00000279288	rs2251864	-2021	-4078	0.154728	697	756	1.17786e-16	0.324146	0.0388439	0.0153197	-0.0567771	0.0233993	7.19094e-06	0.174696	0.0388411	381	0.00273975	0.025835	Other	-	Positive
Ex	ENSG00000105989	rs6960356	94851	47188	0.3772	1517	1843	3.04383e-39	-0.386369	0.0289599	1.24164e-05	0.123716	0.028251	2.62031e-06	-0.135408	0.0287511	323	0.000846362	0.00977319	PCG	WNT2	Positive
Ex	ENSG00000128609	rs10953976	-281743	-302650	0.270978	1122	1324	0.0318688	0.0672616	0.031324	0.0258342	-0.0591283	0.0265142	1.43058e-05	0.137999	0.0317388	351	0.00502134	0.042066	PCG	NDUFA5	Positive
Ex	ENSG00000242593	rs7802999	355750	-84690	0.224314	962	1096	8.86452e-75	-0.596226	0.0314724	0.000646438	0.0793893	0.023242	5.69669e-07	-0.158273	0.0315625	426	0.000242679	0.00352566	LncRNA	AC006148.1	Positive
Ex	BrainMetalnc.70971	rs17676986	58643	-40321	0.138354	636	676	1.15324e-19	-0.375885	0.0410736	0.00273289	0.0682521	0.0227556	1.19534e-06	-0.206356	0.0423844	462	0.000552248	0.00693965	LncRNA	SND1	Positive
Ex	BrainMetalnc.70997	rs61738927	171775	22641	0.297176	1223	1452	0.000117297	0.117268	0.0303962	3.87361e-09	-0.161295	0.0272868	1.46148e-17	0.260274	0.0302818	547	7.99429e-15	7.59014e-13	LncRNA		Positive
Ex	ENSG00000273270	rs62483368	177691	170638	0.30086	1235	1470	1.98035e-147	-0.742732	0.0267759	0.00478725	0.0683814	0.0242178	2.85925e-07	-0.137451	0.0267055	498	0.000142391	0.0021923	LncRNA	AC090114.2	Positive
Ex	BrainMetalnc.70990	rs6976331	1224	-135572	0.408309	1598	1995	5.77185e-23	0.283038	0.0283958	2.55297e-12	-0.214142	0.0304334	5.821e-19	0.253455	0.028259	549	3.19573e-16	3.90107e-14	LncRNA		Positive
Ex	ENSG00000281490	rs6976331	-122059	-124888	0.408309	1598	1995	1.80684e-73	0.512039	0.0272917	3.17584e-07	-0.149964	0.02925	1.71863e-11	0.183608	0.0271602	517	8.88529e-09	3.79624e-07	Other	-	Positive
Ex	ENSG00000271553	rs73465155	37043	35930	0.203643	893	995	0.000124593	-0.134944	0.0351134	0.000186429	0.0917578	0.024518	7.12398e-11	-0.233711	0.0356964	521	3.7116e-08	1.44162e-06	LncRNA	AC018638.7	Positive
Ex	ENSG00000128604	rs10229001	21886	9305	0.389071	1531	1901	4.77734e-11	-0.190722	0.0288637	7.91225e-06	0.132916	0.0296876	3.19867e-10	-0.181516	0.0287433	580	1.85523e-07	5.76471e-06	PCG	IRF5	Positive
Ex	ENSG00000158457	rs13243618	284	-24532	0.248874	1058	1216	7.75085e-08	0.175346	0.0325358	0.00356128	-0.0757186	0.0259537	8.86908e-07	0.160406	0.0325505	656	0.000581811	0.00720285	PCG	TSPAN33	Positive
Ex	BrainMetalnc.71046	rs12533953	32586	-176964	0.0884159	410	432	2.94842e-06	0.231522	0.049414	0.00846001	-0.0571488	0.021686	6.56054e-11	0.331041	0.0504658	653	4.28403e-08	1.62698e-06	LncRNA	UBE2H	Positive
Ex	ENSG00000285106	rs1900517	2665	-7327	0.214286	935	1047	1.1955e-06	0.168034	0.0345135	0.000408099	-0.0883354	0.0249557	4.4889e-10	0.2139	0.0341607	726	3.25894e-07	9.13038e-06	LncRNA	AC016831.6	Positive
Ex	BrainMetalnc.71073	rs2293748	78551	-245722	0.489357	1806	2391	5.7253e-36	-0.350835	0.0275676	4.70502e-06	0.153966	0.0335595	2.25103e-08	-0.1557	0.0277538	860	1.93588e-05	0.000380279	LncRNA		Positive
Ex	ENSG00000226380	rs62473515	8112	-28389	0.100901	457	493	1.30318e-43	-0.629727	0.0445777	0.0511491	0.0417115	0.0213775	3.01055e-08	-0.251767	0.045291	757	2.27899e-05	0.000437617	LncRNA	AC016831.1	Positive
Ex	ENSG00000128585	rs1043893	384861	1075	0.382317	1518	1868	6.65956e-06	-0.132408	0.0293319	6.676e-06	0.133593	0.0295979	7.55168e-11	-0.191916	0.0293525	879	6.63793e-08	2.36338e-06	PCG	MKLN1	Positive
Ex	BrainMetalnc.71153	rs11770521	-37874	-38155	0.448833	1698	2193	7.21854e-24	-0.284976	0.0279923	5.14717e-06	0.145759	0.0319024	9.16749e-07	-0.133903	0.0272085	393	0.000360282	0.00485144	LncRNA	SLC35B4	Positive
Ex	ENSG00000287733	rs2288239	156	-1442	0.474826	1788	2320	3.30333e-88	0.552724	0.0266375	4.01111e-08	-0.169095	0.0307003	2.98194e-10	0.164591	0.0260178	543	1.61919e-07	5.12444e-06	LncRNA	AC083862.2	Positive
Ex	BrainMetalnc.71389	rs1807329	144580	-67051	0.205485	899	1004	2.79508e-12	0.244699	0.0348399	0.00800577	-0.0645965	0.0243392	3.89603e-07	0.182813	0.0359309	588	0.000229087	0.00337508	LncRNA	TMEM178B	Positive
Ex	ENSG00000228775	rs12533304	31633	-2697	0.493451	1832	2411	0	0.972628	0.0211882	1.91247e-09	-0.155547	0.0258042	4.86223e-10	0.131722	0.0210792	415	2.01783e-07	6.15797e-06	LncRNA	WEE2-AS1	Positive
Ex	BrainMetalnc.71406	rs12533304	31590	-2678	0.493451	1832	2411	0	0.978669	0.0210769	1.42505e-09	-0.155964	0.0256687	5.76088e-10	0.130465	0.0209685	417	2.40229e-07	6.95849e-06	LncRNA	WEE2	Positive
Ex	ENSG00000127364	rs12537498	-29559	-34576	0.486287	1811	2376	6.56444e-48	0.400793	0.026963	1.87207e-25	-0.343124	0.0325387	3.38753e-35	0.336402	0.0267463	427	1.44648e-32	2.47203e-29	PCG	TAS2R4	Positive
Ex	ENSG00000155660	rs7781312	24082	-1518	0.206508	894	1009	7.92858e-85	0.649859	0.032003	0.00010293	-0.0882774	0.0226935	3.96611e-12	0.215507	0.0309038	776	3.0777e-09	1.46105e-07	PCG	PDIA4	Positive
Ex	ENSG00000197362	rs6944096	103293	82152	0.391731	1549	1914	1.68107e-179	-0.776173	0.0249279	2.78437e-05	0.108528	0.0258499	4.86939e-08	-0.134544	0.0245821	776	3.77864e-05	0.000676052	PCG	ZNF786	Positive
Ex	ENSG00000197558	rs6974897	66007	8220	0.229226	988	1120	4.03308e-95	0.669321	0.0309336	0.000335012	-0.0845259	0.0235336	6.89489e-09	0.175156	0.0301263	669	4.61268e-06	0.000102378	Other	-	Positive
Ex	ENSG00000171130	rs4725833	-13539	-31309	0.381498	1501	1864	1.39523e-189	-0.784878	0.0243976	3.13325e-05	0.105524	0.0252969	1.21942e-08	-0.139925	0.0244771	676	8.24326e-06	0.000169732	PCG	ATP6V0E2	Positive
Ex	BrainMetalnc.71627	rs6949468	5355	-349721	0.388661	1519	1899	3.84296e-174	-0.75353	0.0246403	0.00120612	0.0837333	0.0258337	5.53331e-06	-0.110724	0.0243159	824	0.00455945	0.039354	LncRNA		Positive
Ex	ENSG00000106526	rs12112222	32209	-47600	0.0875972	407	428	3.26126e-59	-0.792702	0.047534	0.0104358	0.053122	0.0207263	1.63515e-06	-0.24344	0.0506556	765	0.00125089	0.0137896	PCG	ACTR3C	Positive
Ex	ENSG00000188707	rs1449510906	23477	13395	0.275481	1163	1346	1.23333e-93	-0.6306	0.0294003	0.000761741	0.0824393	0.0244584	9.94681e-10	-0.17695	0.0288457	745	7.41038e-07	1.8902e-05	PCG	ZBED6CL	Positive
Ex	ENSG00000127377	rs12539854	16866	4885	0.0978305	459	478	1.01627e-05	0.213465	0.0482628	0.0397433	-0.0464182	0.0225604	1.35919e-06	0.229191	0.0473243	881	0.00119745	0.0132886	PCG	CRYGN	Positive
Ex	ENSG00000106648	rs11770440	48695	-14855	0.39562	1543	1933	6.84053e-33	-0.341134	0.0281375	3.25561e-05	0.123833	0.0297489	1.24732e-06	-0.135616	0.0279035	1040	0.00129721	0.0141078	PCG	GALNTL5	Positive
Ex	BrainMetalnc.71736	rs11978005	-1938	-4255	0.354073	1424	1730	2.52316e-148	-0.719626	0.025852	1.35021e-08	0.147081	0.0258083	9.78399e-15	-0.204453	0.0262433	948	9.27522e-12	7.20516e-10	LncRNA		Positive
Ex	ENSG00000261455	rs11978005	-2392	-4155	0.354073	1424	1730	4.70092e-150	-0.723494	0.0258167	1.80341e-08	0.145586	0.025773	2.11921e-14	-0.201534	0.0262074	945	2.00265e-11	1.42606e-09	LncRNA	LINC01003	Positive
Ex	ENSG00000182648	rs9638048	249436	-2296	0.372084	1483	1818	6.55699e-30	-0.326113	0.0283233	8.13355e-16	0.229494	0.0283088	3.49351e-25	-0.29538	0.0281754	1215	4.24462e-22	1.03629e-19	LncRNA	LINC01006	Positive
Ex	BrainMetalnc.71965	rs73176107	49664	47740	0.231068	1007	1129	1.88556e-13	-0.249948	0.0337839	0.00125659	0.0814459	0.0252195	1.0621e-06	-0.165441	0.0338173	936	0.000994129	0.0111774	LncRNA	PTPRN2	Positive
Ex	BrainMetalnc.71974	rs71547528	15075	359	0.267704	1157	1308	1.14327e-93	0.643787	0.0300092	4.41903e-08	-0.132577	0.0241459	4.93138e-18	0.268618	0.0307952	898	4.42838e-15	4.45182e-13	LncRNA	PTPRN2	Positive
Ex	ENSG00000231419	rs2527237	-719	-22371	0.377609	1495	1845	8.38034e-09	-0.168028	0.0290662	1.87384e-05	0.129892	0.0302927	1.36821e-09	-0.176978	0.0290955	492	6.73161e-07	1.74308e-05	LncRNA	LINC00689	Positive
Ex	ENSG00000106018	rs62487877	123084	8412	0.35878	1426	1753	5.70325e-131	0.674693	0.0260385	0.00258543	-0.0785199	0.0260321	3.33688e-06	0.123187	0.0264366	485	0.00161839	0.0168648	PCG	VIPR2	Positive
Ex	BrainMetalnc.368	rs4073176	11161	3012	0.425501	1659	2079	1.18296e-13	0.21662	0.0290317	5.01913e-05	-0.130164	0.0320444	1.22408e-07	0.160997	0.0303446	370	4.52911e-05	0.00144883	LncRNA		Positive
Ex	ENSG00000217801	rs3813194	3494	-6153	0.442489	1706	2162	1.03002e-52	0.434812	0.027774	3.06879e-08	-0.174747	0.0314549	1.11813e-12	0.206534	0.028874	370	4.13709e-10	3.61995e-08	Other	-	Positive
Ex	ENSG00000176022	rs3813201	-16385	-19189	0.141629	647	692	4.93319e-15	-0.320245	0.0406462	0.0104524	0.0593264	0.023152	1.19491e-06	-0.196542	0.0403681	416	0.000497081	0.010639	PCG	B3GALT6	Positive
Ex	ENSG00000008130	rs1062090	1229	-27996	0.488948	1807	2389	4.23578e-31	-0.326541	0.0277657	0.000103532	0.131014	0.033692	2.89141e-07	-0.1415	0.0275035	665	0.000192278	0.00488913	PCG	NADK	Positive
Ex	BrainMetalnc.439	rs3806168	952	-871	0.18379	818	898	2.49563e-48	-0.521816	0.034939	8.72283e-08	0.12298	0.0229107	3.85114e-21	-0.34116	0.0358197	707	2.72276e-18	6.75017e-16	LncRNA		Positive
Ex	ENSG00000231050	rs7531583	-116750	-117937	0.23946	1017	1170	2.28602e-42	-0.437808	0.0314817	7.12136e-07	0.120505	0.0242414	6.40015e-15	-0.249525	0.0318051	706	4.51851e-12	6.11025e-10	LncRNA	AL109917.1	Positive
Ex	BrainMetalnc.444	rs2803338	242	-39364	0.489971	1800	2394	2.21567e-75	-0.503096	0.0264398	2.24515e-05	0.136447	0.0321259	1.32023e-06	-0.127245	0.0262425	754	0.000995451	0.0178402	LncRNA	CFAP74	Positive
Ex	ENSG00000130762	rs2493267	-18445	-44893	0.0710192	337	347	2.88451e-36	0.692045	0.0541365	0.0310722	-0.0450957	0.0209028	2.8084e-09	0.317467	0.0532251	1071	3.00779e-06	0.000139815	PCG	ARHGEF16	Positive
Ex	ENSG00000171735	rs41402249	977209	-7043	0.185428	822	906	5.70797e-15	-0.284584	0.036206	0.00298777	0.0704882	0.0237176	1.73301e-06	-0.183404	0.0382567	1060	0.00183699	0.0280971	PCG	CAMTA1	Positive
Ex	BrainMetalnc.635	rs41402249	-3047	-7046	0.185428	822	906	3.06833e-14	-0.276941	0.0362424	0.0112742	0.0602086	0.0237415	3.51897e-06	-0.178022	0.0382953	701	0.0024668	0.0344541	LncRNA	CAMTA1	Positive
Ex	ENSG00000049245	rs1048785	9974	-162	0.128326	589	627	1.33702e-25	0.442849	0.0418645	0.000459666	-0.0782493	0.022306	1.39833e-08	0.241343	0.0423933	699	9.77436e-06	0.000392956	PCG	VAMP3	Positive
Ex	ENSG00000116288	rs161815	9283	-21931	0.471756	1741	2305	0.000172923	0.105389	0.0280184	0.000377285	-0.119771	0.033639	1.87868e-06	0.134247	0.0280988	740	0.00139022	0.0227447	PCG	PARK7	Positive
Ex	BrainMetalnc.666	rs12075458	103008	98034	0.423455	1609	2069	0.00182959	-0.0882422	0.0282827	9.14885e-05	0.122007	0.0311349	2.52358e-07	-0.144353	0.0279182	770	0.000194316	0.00489907	LncRNA	RERE	Positive
Ex	BrainMetalnc.821	rs760189	27563	22180	0.18686	840	913	6.14719e-28	0.402641	0.0362922	0.00159664	-0.0756007	0.0239237	9.57293e-07	0.183147	0.0372795	708	0.000677764	0.0134124	LncRNA		Positive
Ex	ENSG00000228140	rs2006255	3512	-2942	0.4693	1755	2293	1.40822e-63	-0.466679	0.0269207	2.41299e-05	0.130547	0.0308551	2.47798e-07	-0.138831	0.0268324	885	0.000219301	0.00548252	LncRNA	AL031283.1	Positive
Ex	ENSG00000116771	rs1991031	-81667	-94984	0.227589	990	1112	3.25528e-69	-0.582769	0.0320935	0.000631277	0.0828384	0.0242058	1.93458e-07	-0.160152	0.0306773	816	0.000157862	0.0041561	PCG	AGMAT	Positive
Ex	ENSG00000288398	rs2863845	6010	3349	0.337086	1379	1647	8.13151e-78	-0.548306	0.0283167	0.000132735	0.104972	0.0274262	1.84513e-07	-0.145233	0.0277724	637	0.000117535	0.00326791	LncRNA	ENSG00000288398	Positive
Ex	BrainMetalnc.980	rs78886584	40963	33631	0.479943	1754	2345	3.97625e-29	-0.308415	0.0271754	2.0642e-05	0.142052	0.0332972	1.51365e-07	-0.143866	0.0273181	611	9.24841e-05	0.00269745	LncRNA		Positive
Ex	BrainMetalnc.1001	rs1985272	129765	-9061	0.431641	1646	2109	1.30266e-145	0.687751	0.0249726	1.27007e-05	-0.126212	0.0288538	4.34469e-07	0.12742	0.0251471	744	0.000323245	0.00751293	LncRNA	CROCC	Positive
Ex	ENSG00000159339	rs35210719	38412	-17397	0.399509	1566	1952	0	1.08198	0.0190546	2.1896e-13	-0.144271	0.0195539	1.82615e-40	0.257673	0.0189955	871	1.59058e-37	4.73196e-34	PCG	PADI4	Positive
Ex	ENSG00000053372	rs10917275	-2264	-10587	0.24253	1037	1185	1.16822e-208	-0.930351	0.0272899	0.000168262	0.080025	0.0212364	2.01929e-06	-0.128046	0.0268835	934	0.00188602	0.0280971	PCG	MRTO4	Positive
Ex	ENSG00000162543	rs6426619	15667	5713	0.200982	874	982	3.78278e-17	-0.294283	0.0346955	0.000523856	0.0841913	0.0242424	2.05967e-06	-0.165654	0.0348089	689	0.00141911	0.0229449	PCG	UBXN10	Positive
Ex	BrainMetalnc.1208	rs61778044	88343	-42116	0.170078	755	831	2.27075e-132	0.859438	0.0329672	1.05251e-08	-0.121724	0.0211993	3.75848e-21	0.319539	0.0335404	817	3.07068e-18	7.02713e-16	LncRNA	CDC42	Positive
Ex	BrainMetalnc.1254	rs11589251	-117397	-164504	0.496111	1814	2424	0.0273003	0.0624558	0.0282794	0.000422437	-0.125023	0.0354122	2.92307e-06	0.133305	0.0284405	701	0.00204907	0.0297406	LncRNA	LUZP1	Positive
Ex	ENSG00000189266	rs17184588	82183	75560	0.499181	1830	2439	0	-1.05379	0.0190224	4.22012e-05	0.0934087	0.0227684	9.54013e-07	-0.0927909	0.0188849	528	0.000503719	0.0106413	PCG	PNRC2	Positive
Ex	ENSG00000001461	rs195730	53771	86	0.401555	1575	1962	0.000514863	-0.10183	0.029282	0.000471893	0.107531	0.0307146	6.04115e-06	-0.135551	0.0298906	614	0.00370927	0.0465767	PCG	NIPAL3	Positive
Ex	ENSG00000183726	rs3093638	20676	-3255	0.456406	1715	2230	7.61008e-164	-0.720142	0.0244106	2.49625e-05	0.122082	0.0289071	2.88259e-08	-0.138183	0.0248238	502	1.44706e-05	0.000544938	PCG	TMEM50A	Positive
Ex	BrainMetalnc.1380	rs61775366	-1678	-19700	0.201596	885	985	9.22227e-39	0.45096	0.034028	8.40373e-07	-0.118104	0.0239149	3.6939e-14	0.250235	0.0328529	427	1.5773e-11	1.95519e-09	LncRNA	EXTL1	Positive
Ex	ENSG00000090273	rs7545442	32010	-12579	0.0714286	337	349	1.66077e-59	0.876581	0.0524227	0.31352	-0.0208547	0.0206877	2.26566e-07	0.266818	0.0514013	355	8.04308e-05	0.00241699	PCG	NUDC	Positive
Ex	ENSG00000130775	rs34631302	9273	-4869	0.353254	1413	1726	8.95418e-20	-0.26758	0.029149	0.000950181	0.0930076	0.0281081	1.86952e-06	-0.140174	0.0293334	322	0.000601984	0.012351	PCG	THEMIS2	Positive
Ex	ENSG00000204138	rs6598927	-45716	-176499	0.305976	1246	1495	5.24945e-185	-0.810357	0.025561	0.00614506	0.063181	0.0230392	7.15957e-07	-0.129675	0.0260915	405	0.000289963	0.00695677	PCG	PHACTR4	Positive
Ex	BrainMetalnc.1611	rs10915028	1070	-4205	0.220835	967	1079	4.0854e-178	0.906904	0.0292611	3.70523e-05	-0.0895657	0.0216721	2.22154e-14	0.224476	0.0292142	787	1.74835e-11	2.08054e-09	LncRNA		Positive
Ex	ENSG00000183431	rs565645	-198012	-231112	0.440237	1668	2151	0.0315172	-0.0613215	0.0284988	0.000168918	0.118611	0.0314842	4.92263e-07	-0.143198	0.0283961	716	0.000352461	0.00795416	PCG	SF3A3	Positive
Ex	ENSG00000131233	rs1320455	-48908	-56426	0.316824	1268	1548	0.000948091	-0.0979956	0.02961	0.000728744	0.0927271	0.0274111	5.86711e-07	-0.148693	0.0296861	665	0.000390163	0.00872733	PCG	GJA9	Positive
Ex	ENSG00000168653	rs34848020	-38205	-46523	0.431846	1642	2110	2.87853e-96	-0.567697	0.0260625	0.00030198	0.105753	0.0292232	7.93714e-07	-0.129453	0.0261533	671	0.000532582	0.011158	PCG	NDUFS5	Positive
Ex	BrainMetalnc.2054	rs3767955	-21045	-28677	0.335039	1344	1637	9.58539e-73	-0.518034	0.0277617	0.000111061	0.103051	0.0266187	4.54183e-07	-0.140096	0.0276954	613	0.000278414	0.006734	LncRNA	RIMS3	Positive
Ex	ENSG00000287743	rs3767955	-21045	-28677	0.335039	1344	1637	3.22782e-73	-0.519712	0.0277529	0.000114718	0.102807	0.0266102	6.78037e-07	-0.137898	0.0276866	613	0.000415636	0.00915939	LncRNA	AL031289.2	Positive
Ex	BrainMetalnc.2128	rs11581978	-124	-9570	0.170692	755	834	5.10288e-21	-0.349149	0.0367757	0.0121002	0.0594532	0.0236763	3.89842e-07	-0.189479	0.0372418	370	0.000144241	0.00390108	LncRNA	ERMAP	Positive
Ex	BrainMetalnc.2226	rs6657078	-15875	-110670	0.176627	773	863	4.92266e-30	0.412407	0.0357373	0.0199	-0.0539395	0.0231524	9.93853e-06	0.153885	0.0347542	400	0.00397541	0.0491684	LncRNA	EIF2B3	Positive
Ex	ENSG00000280670	rs1974271	-6967	-13180	0.33156	1337	1620	0	1.09463	0.0200021	9.18992e-10	-0.114121	0.018565	6.1476e-14	0.152648	0.0202203	336	2.06559e-11	2.36352e-09	PCG	CCDC163	Positive
Ex	BrainMetalnc.2298	rs35361357	6416	5291	0.248874	1066	1216	0.0156662	-0.0798477	0.0330181	0.00577666	0.0732681	0.0265211	1.1717e-05	-0.144229	0.0328399	329	0.00385488	0.0479843	LncRNA	FAAH	Positive
Ex	ENSG00000162456	rs12138736	-11555	-17561	0.43553	1660	2128	5.10565e-25	0.292608	0.0280113	0.00074742	-0.104952	0.0310892	1.52189e-06	0.134393	0.0278808	369	0.000561578	0.0116832	PCG	KNCN	Positive
Ex	BrainMetalnc.2309	rs6662520	35881	35276	0.262382	1118	1282	1.89548e-94	0.642835	0.0298269	0.000606306	-0.0816688	0.0237875	9.31198e-07	0.147556	0.0300016	379	0.000352924	0.00795416	LncRNA	MKNK1	Positive
Ex	ENSG00000162365	rs9701806	-80878	-93178	0.0798199	371	390	0.000251139	-0.190353	0.0519166	0.0320567	0.0469296	0.0218793	1.35483e-07	-0.264007	0.0499365	533	7.22123e-05	0.00221476	PCG	CYP4A22	Positive
Ex	ENSG00000132122	rs12135744	51908	-124927	0.439419	1682	2147	1.41916e-16	-0.236691	0.0284411	0.000127306	0.118664	0.03092	2.59995e-08	-0.159142	0.0284959	484	1.25837e-05	0.000479957	PCG	SPATA6	Positive
Ex	BrainMetalnc.2357	rs2798093	21049	-8948	0.319484	1324	1561	2.92413e-42	-0.411144	0.0296048	1.00873e-06	0.131517	0.0268269	1.59215e-13	-0.219661	0.0295985	453	7.21245e-11	7.39898e-09	LncRNA		Positive
Ex	ENSG00000169213	rs2783179	57508	-25236	0.351208	1405	1716	5.11779e-09	0.172413	0.0293999	0.000199242	-0.106737	0.0286492	3.70539e-08	0.161442	0.0292359	240	8.89294e-06	0.000367452	PCG	RAB3B	Positive
Ex	BrainMetalnc.2570	rs9012	-7397	-10647	0.305567	1271	1493	2.25337e-19	-0.277776	0.0306043	0.000345636	0.0986762	0.0275361	1.1808e-06	-0.145848	0.0299414	750	0.000885602	0.0162634	LncRNA	SSBP3	Positive
Ex	ENSG00000198711	rs67060003	-3872	-6420	0.313344	1300	1531	3.32186e-12	-0.214495	0.0306471	4.98376e-05	0.113572	0.0279482	1.16926e-07	-0.159195	0.0299572	751	8.78114e-05	0.00261239	LncRNA	SSBP3-AS1	Positive
Ex	BrainMetalnc.2575	rs12062930	-10238	-15194	0.374949	1498	1832	3.67656e-90	0.571694	0.0272194	1.02765e-07	-0.14749	0.0276313	1.06574e-12	0.19835	0.0277039	758	8.07833e-10	6.67584e-08	LncRNA	SSBP3	Positive
Ex	BrainMetalnc.2788	rs3004315	-82093	-92851	0.489971	1812	2394	9.36982e-155	-0.705864	0.0247395	2.89504e-10	0.191396	0.0302329	8.78317e-15	-0.194577	0.0249311	548	4.81318e-12	6.22574e-10	LncRNA	EFCAB7	Positive
Ex	BrainMetalnc.2817	rs515394	6911	-553	0.217356	944	1062	2.30103e-44	-0.470459	0.0329959	1.18071e-05	0.105102	0.02394	2.66077e-10	-0.212642	0.0335189	472	1.25588e-07	7.78385e-06	LncRNA	DNAJC6	Positive
Ex	BrainMetalnc.2837	rs11208943	50865	11129	0.173352	768	847	4.61571e-19	0.329975	0.0366829	0.000939546	-0.0774976	0.0233984	3.34185e-09	0.217853	0.036702	489	1.63416e-06	8.10273e-05	LncRNA	SGIP1	Positive
Ex	BrainMetalnc.2908	rs12140479	3000	-27784	0.241506	1044	1180	3.41504e-90	-0.645508	0.0307277	4.33464e-05	0.0971184	0.0237087	4.83896e-11	-0.201521	0.030507	422	2.04204e-08	1.3807e-06	LncRNA		Positive
Ex	ENSG00000116791	rs4650282	2091	-25578	0.105608	488	516	1.45296e-28	0.507599	0.0452035	0.128894	-0.0333764	0.0219727	5.8731e-06	0.210261	0.0463036	317	0.00186177	0.0280971	PCG	CRYZ	Positive
Ex	BrainMetalnc.3014	rs484299	-282685	-383131	0.418133	1629	2043	0.00124921	0.0942294	0.0291625	0.000233055	-0.116029	0.0314809	1.69359e-06	0.14026	0.0292289	540	0.000914538	0.0165899	LncRNA	ST6GALNAC5	Positive
Ex	BrainMetalnc.3340	rs571980	35480	6606	0.200573	868	980	6.2124e-34	0.417385	0.0338494	0.000381974	-0.0839897	0.0236112	2.58709e-10	0.218596	0.0344336	509	1.31683e-07	7.99504e-06	LncRNA		Positive
Ex	ENSG00000137944	rs10801699	34725	-17857	0.476873	1785	2330	0	-1.10664	0.0176886	1.36509e-26	0.224663	0.0208027	1.66848e-32	-0.210719	0.0174927	412	6.87414e-30	6.81686e-27	PCG	KYAT3	Positive
Ex	BrainMetalnc.3375	rs6428555	64877	-14532	0.452927	1704	2213	3.18929e-10	0.17669	0.0279771	2.45515e-12	-0.227927	0.0323671	4.40692e-17	0.235993	0.0278835	412	1.81565e-14	3.17739e-12	LncRNA	LRRC8B	Positive
Ex	BrainMetalnc.3392	rs473412	-5104	-6228	0.435121	1670	2126	7.00939e-152	0.703756	0.0249364	2.82691e-15	-0.216564	0.027241	2.52671e-22	0.242432	0.024703	413	1.04353e-19	3.88063e-17	LncRNA	AC093423.3	Positive
Ex	BrainMetalnc.3503	rs1000606	166949	161790	0.187474	829	916	3.88825e-13	-0.263651	0.0361189	0.00466726	0.0677182	0.0239139	3.29465e-06	-0.170662	0.0366042	314	0.00103452	0.0181041	LncRNA		Positive
Ex	ENSG00000172339	rs12408499	236557	138011	0.29472	1238	1440	0.0445249	-0.0634969	0.0315881	0.000435621	0.0966023	0.0274257	2.04655e-06	-0.147548	0.0309957	601	0.00122998	0.0204424	PCG	ALG14	Positive
Ex	BrainMetalnc.3557	rs877626	36361	28165	0.145518	656	711	5.66393e-95	-0.797381	0.0368839	0.00290176	0.0636192	0.0213418	6.7348e-06	-0.161549	0.0358063	537	0.00361659	0.0459801	LncRNA		Positive
Ex	ENSG00000228971	rs877626	36361	-235922	0.145518	656	711	3.6608e-95	-0.79811	0.0368767	0.00267624	0.0641356	0.0213376	6.52319e-06	-0.161761	0.0357993	569	0.0037117	0.0465767	LncRNA	LINC02607	Positive
Ex	ENSG00000162695	rs12741674	72254	-13427	0.129349	586	632	1.84941e-11	-0.281033	0.0416387	0.0360853	0.0470692	0.0224446	2.20676e-08	-0.242176	0.0431415	481	1.06145e-05	0.000415502	PCG	SLC30A7	Positive
Ex	BrainMetalnc.3706	rs4561063	183530	49298	0.463569	1722	2265	5.94148e-13	-0.201073	0.0277686	1.77648e-08	0.190226	0.0336598	9.60007e-11	-0.182137	0.0280138	513	4.92483e-08	3.18508e-06	LncRNA	OLFM3	Positive
Ex	ENSG00000143119	rs2885805	4105	-24629	0.290626	1217	1420	2.03663e-132	0.718966	0.0275732	9.58883e-12	-0.164009	0.0239577	1.27365e-21	0.264487	0.0274281	717	9.13211e-19	2.46982e-16	PCG	CD53	Positive
Ex	BrainMetalnc.3945	rs1814083	4790	-1845	0.113385	521	554	1.62848e-35	0.548156	0.0433701	0.0101211	-0.0568405	0.0220853	1.006e-09	0.26395	0.0430409	633	6.36797e-07	3.44449e-05	LncRNA		Positive
Ex	ENSG00000134245	rs12728311	135276	71652	0.214286	918	1047	1.7819e-193	0.921272	0.0282895	4.01776e-07	-0.104172	0.0204982	3.93498e-23	0.28866	0.0288454	595	2.34131e-20	9.95057e-18	PCG	WNT2B	Positive
Ex	BrainMetalnc.3968	rs7554345	41048	36927	0.48158	1786	2353	3.64198e-77	0.507061	0.0263079	8.26504e-12	-0.211333	0.0307732	4.99751e-17	0.219112	0.0259352	564	2.8186e-14	4.65851e-12	LncRNA	ST7L	Positive
Ex	ENSG00000116489	rs351372	-103207	-155018	0.475031	1776	2321	6.7234e-11	0.186442	0.0284385	6.55216e-05	-0.130883	0.0327295	1.89377e-06	0.132929	0.0278324	545	0.0010321	0.0181041	PCG	CAPZA1	Positive
Ex	ENSG00000197323	rs59800082	117253	-1159	0.34343	1383	1678	1.92369e-08	-0.166973	0.0296181	0.000154336	0.107654	0.0284052	2.14742e-09	-0.177772	0.0295847	572	1.22832e-06	6.30045e-05	PCG	TRIM33	Positive
Ex	ENSG00000177551	rs2797185	-599	-8139	0.329104	1348	1608	2.97415e-83	-0.565147	0.0281206	1.45748e-08	0.150256	0.0264267	1.06035e-11	-0.192255	0.0281441	554	5.87435e-09	4.26249e-07	PCG	NHLH2	Positive
Ex	ENSG00000116874	rs2765543	-10428	-119602	0.257675	1085	1259	1.1165e-76	-0.566877	0.0295137	7.70448e-15	0.18786	0.0240183	8.44395e-26	-0.313385	0.0295003	283	2.38964e-23	1.18486e-20	PCG	WARS2	Positive
Ex	ENSG00000232780	rs2854961	-17927	-18841	0.126279	576	617	0.00141724	0.136052	0.0425856	0.00898135	-0.0591501	0.0226207	1.70975e-08	0.242955	0.0429395	208	3.55627e-06	0.000160302	Other	-	Positive
Ex	ENSG00000143318	rs617698	2507	-8804	0.390503	1518	1908	0	-1.03311	0.0196562	2.09796e-11	0.142143	0.0211186	3.03356e-20	-0.185791	0.0199784	361	1.09512e-17	2.32712e-15	PCG	CASQ1	Positive
Ex	ENSG00000186517	rs12126136	-70522	-93546	0.289603	1219	1415	0.00145668	0.100785	0.0316257	0.000571612	-0.0935234	0.0271138	1.25654e-06	0.156287	0.0321664	617	0.000775286	0.0146909	PCG	ARHGAP30	Positive
Ex	ENSG00000248485	rs113493294	77704	50999	0.0624233	295	305	1.68559e-05	0.252672	0.0586035	0.294338	-0.022495	0.0214467	5.1544e-06	0.25359	0.0555071	592	0.00305141	0.0406288	PCG	PCP4L1	Positive
Ex	BrainMetalnc.4960	rs9427389	83141	47604	0.260131	1097	1271	3.82129e-11	0.21251	0.0319984	0.00212517	-0.0791944	0.0257505	2.77422e-07	0.168434	0.0326888	654	0.000181434	0.00469361	LncRNA		Positive
Ex	ENSG00000162746	rs1954172	-13618	-20198	0.11666	538	570	5.69078e-64	-0.732457	0.0421103	0.0173784	0.0511221	0.0214778	2.20978e-06	-0.192355	0.0405419	630	0.00139216	0.0227447	PCG	FCRLB	Positive
Ex	ENSG00000118217	rs1434168967	189784	-21492	0.262792	1116	1284	1.03823e-34	0.391233	0.0313413	5.6716e-07	-0.128629	0.0256465	3.96465e-12	0.221135	0.0317106	693	2.7475e-09	2.09585e-07	PCG	ATF6	Positive
Ex	BrainMetalnc.5003	rs171137	9249	4096	0.465616	1761	2275	0.00135366	-0.092622	0.0288716	1.54783e-05	0.144464	0.0333596	2.36056e-07	-0.150711	0.0290771	630	0.000148715	0.00398584	LncRNA	NOS1AP	Positive
Ex	ENSG00000143194	rs7551881	10493	-36139	0.362055	1452	1769	2.33944e-300	-0.965599	0.0224956	3.75682e-07	0.113667	0.0223101	9.13333e-07	-0.110417	0.0224329	646	0.000590013	0.0121895	PCG	MAEL	Positive
Ex	ENSG00000143147	rs10800335	41986	-16138	0.434711	1658	2124	6.99434e-79	-0.520527	0.0266817	0.000663547	0.0998706	0.0292995	1.42208e-07	-0.140648	0.0266485	808	0.000114904	0.00326791	PCG	GPR161	Positive
Ex	ENSG00000143156	rs1517748	235892	667	0.227589	988	1112	0.00644423	0.0926071	0.0339639	0.000314483	-0.0915294	0.0253668	5.6437e-09	0.198325	0.0339138	642	3.62325e-06	0.000160883	PCG	NME7	Positive
Ex	BrainMetalnc.5205	rs67450288	-18509	-41078	0.384568	1514	1879	1.04825e-70	0.502061	0.027328	0.000217765	-0.106418	0.0287381	2.59603e-08	0.157366	0.0281765	583	1.51349e-05	0.000562828	LncRNA	NME7	Positive
Ex	ENSG00000117477	rs10489187	27621	-38178	0.1228	568	600	9.02914e-158	-1.08852	0.0377234	1.21392e-05	0.087033	0.0198519	1.78512e-12	-0.257141	0.0362829	580	1.03537e-09	8.32493e-08	PCG	CCDC181	Positive
Ex	ENSG00000198734	rs9332546	57058	-17579	0.29738	1242	1453	6.63331e-37	0.391538	0.0303405	0.00591717	-0.0740781	0.026891	2.10368e-06	0.145008	0.0304982	534	0.00112336	0.0191481	PCG	F5	Positive
Ex	ENSG00000188404	rs6704382	99564	78527	0.497135	1828	2429	5.28162e-06	-0.129835	0.028451	0.00054757	0.12101	0.0349646	3.66616e-06	-0.131388	0.0283157	501	0.00183675	0.0280971	PCG	SELL	Positive
Ex	ENSG00000271811	rs10919449	2136	92	0.426115	1650	2082	4.66108e-33	0.343451	0.0282511	0.000147128	-0.117702	0.0309588	1.77261e-06	0.138165	0.0288479	474	0.000840219	0.0158206	LncRNA	Z97200.1	Positive
Ex	ENSG00000117586	rs7518129	10698	-12902	0.334016	1344	1632	0.00659278	0.0807399	0.0296938	3.46644e-06	-0.132949	0.0285802	1.13847e-09	0.180379	0.0295098	355	4.04158e-07	2.22661e-05	PCG	TNFSF4	Positive
Ex	ENSG00000227373	rs576980739	708977	659080	0.256652	1093	1254	2.10578e-17	0.27556	0.0322226	0.00803494	-0.0685456	0.0258392	9.97454e-06	0.143252	0.0323586	283	0.00282279	0.038239	LncRNA	RABGAP1L-DT	Positive
Ex	BrainMetalnc.5402	rs72720771	-34185	-82142	0.100082	471	489	1.41033e-11	-0.324166	0.0477468	0.00669368	0.0597144	0.0220021	3.01261e-06	-0.231953	0.049553	457	0.00137676	0.0227447	LncRNA	BRINP2	Positive
Ex	ENSG00000143322	rs2793799	133744	3390	0.356324	1452	1741	9.53755e-98	0.608408	0.0276951	2.01211e-06	-0.127534	0.0267719	1.61532e-08	0.161458	0.0284861	424	6.84897e-06	0.0002953	PCG	ABL2	Positive
Ex	ENSG00000135835	rs3820314	38144	-573	0.243348	1030	1189	5.11074e-27	-0.348377	0.0319792	0.0043236	0.0718898	0.0251696	1.37342e-07	-0.169479	0.0320718	553	7.59503e-05	0.00230563	PCG	KIAA1614	Positive
Ex	BrainMetalnc.5527	rs12565562	696	-35061	0.348547	1427	1703	9.60515e-16	0.242856	0.030034	0.000234033	-0.106073	0.0287881	3.39528e-08	0.165996	0.0299763	534	1.81308e-05	0.000649869	LncRNA	CACNA1E	Positive
Ex	ENSG00000135828	rs34335333	19283	3661	0.359804	1465	1758	4.45789e-258	0.928657	0.0238655	2.96787e-06	-0.111527	0.0238102	1.60414e-06	0.112008	0.0232883	430	0.000689778	0.0134124	PCG	RNASEL	Positive
Ex	ENSG00000058085	rs6678888	327	-58562	0.30086	1263	1470	9.21689e-142	0.750102	0.0276616	0.00513055	-0.0686305	0.0244999	2.55211e-06	0.128077	0.0271632	467	0.00119184	0.0199197	PCG	LAMC2	Positive
[truncated: 12,423 more rows]
