# Supplementary material
Source: Research Square preprint supplement (doi:10.21203/rs.3.rs-8945185/v1)
Supplement: Supplementary file 5 [file d5421acaa796818806dfd60d.xlsx]

## Sheet: Sheet1
Supplementary Table 4.Colocalization results (COLOC).
Cell	Trait	eGene	eGene_chr	eGene_pos	eGene_topSNP	eGene_topSNP_p	GWAS_topSNP	GWAS_topSNP_p	nsnp	PP.H0	PP.H1	PP.H2	PP.H3	PP.H4	eGeneType
In	EA	BrainMetalnc.12989	11	66123402	rs10219183	9.89754e-05	rs76878669	8.67e-12	1851	6.69332e-06	1.96269e-06	0.139873	0.0401953	0.819923	LncRNA
Ast	SCZ	BrainMetalnc.71023	7	128602374	rs339065	9.7569e-05	rs35045093	3.361e-08	3578	0.00108618	0.000780721	0.10982	0.0781255	0.810188	LncRNA
Ex	SCZ	ENSG00000159921	9	36214437	rs72624021	9.71295e-05	rs2381411	1.282e-08	3153	0.000833142	0.000537493	0.10977	0.069998	0.818862	PCG
In	Insomnia	ENSG00000102710	13	37583751	rs8000946	8.94881e-05	rs9576155	9.264e-09	4211	0.0017625	0.00128508	0.069887	0.0500795	0.876986	PCG
Oli	PD	BrainMetalnc.18523	12	123293712	rs10847839	8.91968e-05	rs10847864	9.812e-13	2668	3.32846e-08	8.00398e-09	0.0449695	0.00986869	0.945162	LncRNA
In	EA	ENSG00000213413	7	99815863	rs2572024	8.43525e-05	rs2406253	6.4e-11	2023	1.56271e-06	3.69662e-06	0.0546901	0.128554	0.816751	PCG
In	SCZ	BrainMetalnc.66109	6	109125194	rs9486916	8.28248e-05	rs2153960	9.223e-10	2726	4.22162e-05	2.37306e-05	0.117001	0.064951	0.817982	LncRNA
Oli	AAM	ENSG00000166436	11	8633583	rs6486253	8.25847e-05	rs7126235	2.09108e-17	4222	4.43492e-13	6.63342e-13	0.0431897	0.0637068	0.893104	PCG
In	EA	BrainMetalnc.11562	11	11263182	rs10831656	8.18804e-05	rs7928622	2.52e-08	5319	0.00330968	0.00155062	0.0452003	0.0202472	0.929692	LncRNA
Oli	SCZ	BrainMetalnc.25857	15	85746673	rs35828350	7.73718e-05	rs11638554	3.618e-13	4015	3.7717e-09	5.35781e-09	0.0672635	0.0947118	0.838025	LncRNA
Ast	AAM	BrainMetalnc.65331	6	76401189	rs56228311	7.5475e-05	rs111477662	1.13227e-09	3010	7.55811e-06	1.37844e-05	0.0670261	0.12143	0.811523	LncRNA
In	Neuroticism	ENSG00000260911	16	31054470	rs35713203	7.34911e-05	rs3751855	7.634e-11	1698	3.12864e-06	1.85017e-06	0.0925668	0.0538873	0.853541	LncRNA
Ex	ADHD	BrainMetalnc.49967	3	20012304	rs4858241	7.30825e-05	rs4858241	1.74e-08	3616	0.0004289	0.00016555	0.105431	0.0398406	0.854134	LncRNA
In	EA	BrainMetalnc.29895	17	7372838	rs72827503	7.06688e-05	rs2302761	1e-10	3465	2.71518e-06	2.81855e-06	0.0527538	0.0538688	0.893372	LncRNA
Ex	AD	ENSG00000108852	17	41952724	rs708384	6.88402e-05	rs5848	1.756e-12	2687	4.42982e-07	2.69277e-07	0.0982881	0.0589038	0.842807	PCG
Oli	AAM	BrainMetalnc.37648	19	47884602	rs62136855	6.82579e-05	rs3810291	7.41284e-14	3766	1.99294e-08	1.82731e-08	0.0743597	0.0673213	0.858319	LncRNA
Oli	IQ	BrainMetalnc.37648	19	47884602	rs62136855	6.82579e-05	rs889169	2.751e-08	3796	0.00219712	0.00201817	0.0919931	0.0836803	0.820111	LncRNA
Ex	BIP	ENSG00000185630	1	164524820	rs2165446	6.46236e-05	rs10737496	7.172e-09	3845	5.52993e-05	6.4033e-05	0.0513674	0.0585902	0.889923	PCG
Oli	AAM	BrainMetalnc.40510	2	73964819	rs35528262	6.37855e-05	rs6718289	1.06936e-08	2402	0.000334957	0.000286856	0.0967478	0.0820339	0.820597	LncRNA
Oli	SCZ	BrainMetalnc.76266	9	35880386	rs56010504	6.28439e-05	rs2381411	1.282e-08	2924	0.000603868	0.000334542	0.0716964	0.0388312	0.888534	LncRNA
Ast	SCZ	ENSG00000183207	19	49496818	rs12104272	6.17033e-05	rs2304205	2.38e-14	3786	7.84918e-10	4.49703e-10	0.063549	0.0355082	0.900943	PCG
Ast	SCZ	ENSG00000110925	12	51454987	rs1979702	6.04497e-05	rs578470	2.327e-08	2699	0.00162804	0.00054775	0.138594	0.0458162	0.813414	PCG
In	AD	ENSG00000146648	7	55086709	rs151057105	6.02476e-05	rs74504435	2.046e-09	4771	4.02217e-05	1.62055e-05	0.0387715	0.0146746	0.946497	PCG
Ex	ALS	ENSG00000168314	3	39508688	rs9871799	5.92671e-05	rs631312	5.242e-11	3728	2.71316e-06	2.50217e-06	0.0796172	0.0725779	0.8478	PCG
Ast	EA	BrainMetalnc.21283	14	23398815	rs7155857	5.51364e-05	rs1043209	4.22e-15	4445	4.67781e-11	1.05301e-10	0.0243933	0.0539893	0.921617	LncRNA
In	SCZ	BrainMetalnc.18027	12	110381662	rs4766428	5.51007e-05	rs4766428	2.61e-17	2684	1.17462e-12	6.57576e-13	0.0197369	0.0100789	0.970184	LncRNA
In	PD	ENSG00000080854	11	133766332	rs329647	5.47813e-05	rs329647	1.944e-10	4791	2.66481e-06	1.40147e-06	0.0348299	0.0173699	0.947796	PCG
Ex	SCZ	ENSG00000003509	2	37458773	rs7568510	5.47715e-05	rs3770752	2.859e-11	4383	2.00804e-06	1.59672e-06	0.0931983	0.0732743	0.833524	PCG
Ex	EA	BrainMetalnc.14221	11	111557786	rs17565975	5.4535e-05	rs17565975	2.56e-11	3251	3.75477e-06	2.48909e-06	0.0200124	0.0122988	0.967683	LncRNA
In	AAM	BrainMetalnc.48162	22	22097025	rs2845466	5.18442e-05	rs1005579	1.17216e-09	3385	5.27971e-05	7.30925e-05	0.0758167	0.104141	0.819916	LncRNA
Ast	IQ	ENSG00000084636	1	32117863	rs6680835	5.09617e-05	rs7546297	1.332e-12	2700	2.89563e-08	3.85871e-08	0.035531	0.0464304	0.918039	PCG
In	EA	BrainMetalnc.7308	1	243473491	rs1796844	5.02218e-05	rs3897821	8.25e-17	3288	4.49511e-12	8.70935e-12	0.0323771	0.0618253	0.905798	LncRNA
Ex	SCZ	BrainMetalnc.17977	12	109265619	rs933847	4.89001e-05	rs3764002	1.648e-09	3830	0.000127303	5.71174e-05	0.070032	0.0305221	0.899261	LncRNA
Oli	IQ	ENSG00000178750	3	93733208	rs12634349	4.87364e-05	rs62266110	1.319e-08	1582	0.00268659	0.00434853	0.0701145	0.112677	0.810173	PCG
In	SCZ	ENSG00000186792	3	50330278	rs11917269	4.69996e-05	rs11917680	4.167e-10	2071	1.2674e-05	9.83643e-06	0.0460382	0.0348117	0.919128	PCG
In	SmokingInitiation	ENSG00000186792	3	50330278	rs11917269	4.69996e-05	rs12632110	4.78e-10	2098	2.64261e-05	2.05325e-05	0.0809585	0.062046	0.856949	PCG
Ast	EA	BrainMetalnc.74919	8	130880252	rs857233	4.66392e-05	rs837080	1.43e-10	4293	8.22136e-06	1.04613e-05	0.0571872	0.0718974	0.870897	LncRNA
Oli	AAM	ENSG00000137968	1	75667815	rs17095707	4.6389e-05	rs7553348	4.24e-35	3539	2.06339e-30	3.01803e-30	0.071545	0.103821	0.824634	PCG
Oli	SmokingInitiation	ENSG00000137968	1	75667815	rs17095707	4.6389e-05	rs2344508	8.82e-10	3581	1.41951e-05	2.07587e-05	0.0687965	0.0997753	0.831393	PCG
Ast	BIP	ENSG00000090263	7	140702409	rs38727	4.43969e-05	rs10255167	1.599e-08	2986	0.000116336	0.000386291	0.0359106	0.118395	0.845192	PCG
In	IQ	ENSG00000178750	3	93733208	rs62266142	4.39825e-05	rs62266110	1.319e-08	1581	0.004627	0.00275366	0.120674	0.0710159	0.800929	PCG
Oli	AD	ENSG00000185800	19	46286204	rs365653	4.38868e-05	rs365653	1.848e-68	3739	8.32142e-64	6.4935e-64	0.0155048	0.0111256	0.97337	PCG
Ex	PD	ENSG00000136243	7	23221445	rs199357	4.3883e-05	rs858295	3.831e-09	4284	7.02947e-06	1.24086e-05	0.0382195	0.0665706	0.89519	PCG
In	BIP	ENSG00000090263	7	140702409	rs10224312	4.36614e-05	rs10255167	1.599e-08	2991	8.78919e-05	0.000207745	0.0271305	0.0632175	0.909356	PCG
Ex	SCZ	ENSG00000188938	9	96193722	rs12335532	4.2599e-05	rs6479487	1.374e-08	3773	0.000170639	0.000187461	0.0604961	0.0655864	0.873559	PCG
In	PD	ENSG00000170425	17	15848230	rs178838	4.22989e-05	rs4566208	3.884e-08	3165	2.22333e-05	9.49638e-05	0.0334129	0.14189	0.82458	PCG
Ast	Insomnia	ENSG00000112667	6	43193366	rs6917902	4.1852e-05	rs6938026	2.718e-09	2576	0.000229412	0.000129979	0.0804911	0.0447298	0.87442	PCG
Ast	SCZ	ENSG00000112667	6	43193366	rs6917902	4.1852e-05	rs113113059	2.288e-11	2677	1.79769e-06	1.02691e-06	0.105028	0.0591601	0.835809	PCG
Ex	SmokingInitiation	BrainMetalnc.13690	11	85697782	rs11234584	4.11606e-05	rs7929518	1.56e-08	3557	0.000358565	0.000569278	0.0487021	0.0764484	0.873922	LncRNA
Oli	BIP	ENSG00000105926	7	24612886	rs2521754	3.87302e-05	rs12672003	2.718e-09	5291	6.63843e-05	0.000100167	0.0583806	0.0872358	0.854217	PCG
Oli	EA	ENSG00000105926	7	24612886	rs2521754	3.87302e-05	rs79265434	6.08e-19	5173	5.41699e-14	7.98126e-14	0.0571581	0.0833558	0.859486	PCG
Oli	SCZ	ENSG00000105926	7	24612886	rs2521754	3.87302e-05	rs79210963	2.584e-11	5272	4.83144e-07	7.2851e-07	0.0649718	0.09713	0.837897	PCG
Oli	AAM	ENSG00000107669	10	123499938	rs2420977	3.85895e-05	rs10887020	1.5849e-08	4394	0.000289944	0.000410021	0.0681708	0.0955676	0.835562	PCG
Oli	AAM	ENSG00000074181	19	15269848	rs6512030	3.77016e-05	rs7245841	3.74141e-08	5345	0.000161094	0.000361235	0.0281557	0.062227	0.909095	PCG
In	Juvenile_myoclonic_epilepsy	ENSG00000099365	16	31000576	rs2359612	3.61138e-05	rs1046276	2.49977e-11	1234	4.38044e-06	1.6781e-05	0.0327631	0.124669	0.842547	PCG
In	EA	ENSG00000085719	8	87526663	rs7823951	3.57772e-05	rs7833201	5.05e-09	3261	0.000228807	0.000512586	0.03732	0.0827273	0.879211	PCG
In	PD	ENSG00000138640	4	89647105	rs9224	3.52097e-05	rs356219	3.469e-41	3996	4.48955e-36	4.02638e-36	0.058797	0.0518418	0.889361	PCG
Oli	Neuroticism	ENSG00000172059	2	10182975	rs10182505	3.5074e-05	rs4396680	2.588e-09	5106	0.000390612	0.000385064	0.0374919	0.0360337	0.925699	PCG
In	SCZ	ENSG00000115073	2	98272401	rs11692435	3.42036e-05	rs11692435	2.992e-08	2038	0.000377537	0.000290336	0.0305162	0.0225215	0.946294	PCG
In	AAM	BrainMetalnc.36153	19	15492394	rs10413241	3.27182e-05	rs7245841	3.74141e-08	5326	0.000127613	0.000379812	0.0223063	0.0654782	0.911708	LncRNA
In	AAM	ENSG00000070061	9	111629177	rs72607173	3.24746e-05	rs72607161	3.33705e-12	4978	3.1888e-08	7.96216e-08	0.0532299	0.132096	0.814674	PCG
In	EA	ENSG00000070061	9	111629177	rs72607173	3.24746e-05	rs1051474	4.86e-12	5046	1.07967e-07	2.69426e-07	0.0356224	0.0880171	0.87636	PCG
In	IQ	ENSG00000100324	22	39795784	rs4821894	2.99559e-05	rs5750830	2.459e-13	2856	6.95671e-09	3.36706e-08	0.0281243	0.135286	0.83659	PCG
Ast	EA	BrainMetalnc.51253	3	56605444	rs7620259	2.95236e-05	rs7625428	1.26e-08	3609	0.000811365	0.00242758	0.0419232	0.124602	0.830235	LncRNA
Ex	Neuroticism	ENSG00000260077	2	10179218	rs6752702	2.89622e-05	rs4396680	2.588e-09	5086	0.000565866	0.000599674	0.0543133	0.0566704	0.887851	LncRNA
Oli	IQ	BrainMetalnc.14071	11	105632705	rs2155022	2.80987e-05	rs7116046	3.267e-08	3286	0.000535666	0.00170929	0.0458282	0.14543	0.806497	LncRNA
In	EA	ENSG00000103264	16	87361032	rs11647079	2.74062e-05	rs60483752	3.89e-10	5688	6.20885e-05	0.000121454	0.0562496	0.109198	0.834369	PCG
In	Neuroticism	ENSG00000103264	16	87361032	rs11647079	2.74062e-05	rs1050847	2.098e-08	5696	0.000805215	0.00156875	0.0556468	0.107579	0.8344	PCG
In	ALS	ENSG00000211445	5	150399998	rs4958867	2.69859e-05	rs7727034	2.826e-10	3895	5.03662e-06	4.6825e-06	0.0328235	0.0295781	0.937589	PCG
In	AAM	ENSG00000133422	22	31322641	rs9609193	2.68182e-05	rs5753407	4.64713e-09	2989	4.15913e-05	7.49949e-05	0.0630225	0.112814	0.824047	PCG
In	IQ	ENSG00000133422	22	31322641	rs9609193	2.68182e-05	rs5753383	4.998e-08	2951	0.00031827	0.000574458	0.0553991	0.0991475	0.844561	PCG
In	EA	BrainMetalnc.78087	9	123583584	rs12003646	2.51731e-05	rs2416759	1.38e-08	2524	0.00058495	0.00302416	0.0308738	0.158809	0.806708	LncRNA
In	Neuroticism	ENSG00000099365	16	31000576	rs2855475	2.47173e-05	rs3751855	7.634e-11	1762	1.05363e-06	5.58331e-06	0.0308429	0.162634	0.806517	PCG
Ast	AAM	BrainMetalnc.2933	1	72748098	rs11209943	2.4629e-05	rs3101336	3.91655e-15	2429	3.50508e-11	4.83225e-11	0.0215062	0.0286996	0.949794	LncRNA
Ast	MDD	BrainMetalnc.2933	1	72748098	rs11209943	2.4629e-05	rs6699744	1.498e-18	2456	3.67253e-14	5.0701e-14	0.0254267	0.0341623	0.940411	LncRNA
Oli	SCZ	ENSG00000167491	19	19496634	rs34725331	2.42782e-05	rs1858999	7.971e-14	3058	5.35189e-10	1.4291e-09	0.0536042	0.142334	0.804062	PCG
Oli	EA	BrainMetalnc.2933	1	72748098	rs12124523	2.41394e-05	rs1620977	1.14e-25	2461	3.59063e-20	1.38801e-20	0.056545	0.0209357	0.922519	LncRNA
Ex	EA	BrainMetalnc.77795	9	111830908	rs59904140	2.37787e-05	rs1051474	4.86e-12	4941	9.70326e-08	2.3052e-07	0.0320232	0.0751844	0.892792	LncRNA
Ast	AAM	BrainMetalnc.47545	21	40654054	rs8134638	2.37496e-05	rs2836950	3.49747e-18	5128	6.89054e-13	1.23907e-12	0.0699575	0.124994	0.805049	LncRNA
Oli	AAM	BrainMetalnc.36914	19	36195890	rs61218414	2.36822e-05	rs12151356	2.99365e-13	3521	7.42353e-09	1.00228e-08	0.0758798	0.101626	0.822495	LncRNA
Oli	SCZ	BrainMetalnc.17835	12	104937599	rs2583261	2.25451e-05	rs10861176	5.227e-09	4724	4.72433e-05	0.000107541	0.0341947	0.0769498	0.888701	LncRNA
Ast	EA	ENSG00000120071	17	44107281	rs112385572	2.20105e-05	rs74998289	1.31e-17	1193	2.36386e-14	2.7273e-13	0.0150885	0.173271	0.81164	PCG
Ast	IQ	ENSG00000178952	16	28853731	rs62036613	2.17944e-05	rs2008514	1.246e-24	1930	4.50373e-21	2.73022e-20	0.0141249	0.0847261	0.901149	PCG
Ast	EA	ENSG00000013810	4	1723226	rs17802841	2.11972e-05	rs112687095	2.42e-08	3650	0.000490372	0.00216747	0.0335459	0.147458	0.816338	PCG
Ex	SCZ	ENSG00000144034	2	73956230	rs9309473	2.03418e-05	rs6546857	2.8e-09	2374	8.4644e-06	4.14195e-05	0.0311156	0.151443	0.817392	PCG
Ex	IQ	BrainMetalnc.31015	17	34930300	rs11263770	1.99697e-05	rs2285640	2.376e-10	2600	4.6724e-06	6.64028e-06	0.0289832	0.0402593	0.930746	LncRNA
Ast	IQ	ENSG00000128268	22	39853016	rs1005522	1.95855e-05	rs5750830	2.459e-13	2793	1.64446e-08	2.43315e-08	0.0664825	0.0975318	0.835986	PCG
In	IQ	BrainMetalnc.3823	1	109860598	rs10858090	1.95136e-05	rs1144593	1.572e-10	3152	3.49921e-07	2.88816e-06	0.0168918	0.138576	0.844529	LncRNA
Oli	Neuroticism	BrainMetalnc.52808	3	136446391	rs684845	1.91324e-05	rs655836	7.421e-13	2864	2.80278e-08	7.91242e-08	0.0406493	0.11391	0.845441	LncRNA
Ex	IQ	ENSG00000120306	5	139554740	rs6896007	1.80827e-05	rs4463213	3.004e-12	2063	2.42325e-08	1.01208e-07	0.0150974	0.0621322	0.92277	PCG
Ast	SCZ	BrainMetalnc.66875	6	143660121	rs9399440	1.74831e-05	rs9390083	2.95e-08	3278	0.00161983	0.000978693	0.101537	0.0605129	0.835351	LncRNA
Ex	IQ	ENSG00000197128	19	57978030	rs60037165	1.73434e-05	rs4801593	2.872e-08	4295	0.00134077	0.00131123	0.0724677	0.0700164	0.854864	PCG
Ast	AD	ENSG00000169592	16	30007384	rs12921753	1.71315e-05	rs12325539	1.245e-11	1531	3.94706e-08	1.72041e-07	0.0126892	0.0543754	0.932935	PCG
Ast	SCZ	ENSG00000169592	16	30007384	rs12921753	1.71315e-05	rs3814883	8.817e-15	1536	4.33876e-11	1.96792e-10	0.0125914	0.0561792	0.931229	PCG
Ast	SCZ	BrainMetalnc.43391	2	198456325	rs788012	1.69212e-05	rs2914983	1.095e-14	2551	4.61182e-11	2.82457e-10	0.0233078	0.141917	0.834775	LncRNA
In	BIP	ENSG00000175115	11	65837742	rs2254388	1.61575e-05	rs475805	1.991e-09	2066	1.57366e-05	2.7274e-05	0.0492441	0.0844816	0.866231	PCG
Ast	BIP	BrainMetalnc.31204	17	38147159	rs3826331	1.58033e-05	rs61554907	1.636e-08	2834	0.000192137	0.00113687	0.0200015	0.117488	0.861182	LncRNA
Ast	SCZ	ENSG00000257298	12	50579362	rs6580734	1.57163e-05	rs578470	2.327e-08	2547	0.000414168	0.00127823	0.0357017	0.109331	0.853275	LncRNA
In	SmokingInitiation	ENSG00000166275	10	104614015	rs11191421	1.5387e-05	rs12356821	6.27e-15	2671	1.74679e-10	4.26323e-10	0.053675	0.130183	0.816141	PCG
Ex	PD	BrainMetalnc.6202	1	205675290	rs1891091	1.53747e-05	rs823106	4.1e-10	2832	9.05665e-06	5.39232e-06	0.0958066	0.0561952	0.847984	LncRNA
Ast	EA	ENSG00000275764	12	27190032	rs1813557	1.5026e-05	rs4964046	3.36e-09	4423	7.99481e-06	5.05499e-05	0.010095	0.0629019	0.926945	LncRNA
Ex	IQ	ENSG00000167550	12	49458458	rs7296288	1.48283e-05	rs1054442	2.518e-14	3122	4.36522e-09	4.63027e-09	0.0698228	0.0732053	0.856972	PCG
Ex	EA	ENSG00000167550	12	49458458	rs7296288	1.48283e-05	rs1054442	8.42e-16	3130	3.22309e-10	3.50966e-10	0.0469377	0.050208	0.902854	PCG
Ast	AD	BrainMetalnc.12375	11	47758356	rs10458914	1.41978e-05	rs11500477	3.277e-12	2961	5.48273e-08	3.95121e-07	0.024375	0.174861	0.800763	LncRNA
In	AAM	BrainMetalnc.43558	2	203156811	rs13389798	1.3604e-05	rs6753802	7.87144e-12	2739	9.05056e-09	8.17033e-08	0.0125164	0.112116	0.875368	LncRNA
Ast	AD	ENSG00000214309	7	99724407	rs7806537	1.33563e-05	rs7384878	2.133e-18	1997	3.73667e-13	2.07953e-13	0.0770642	0.0420068	0.880929	PCG
Ast	MDD	ENSG00000281649	9	37079836	rs495304	1.32313e-05	rs62535714	4.686e-09	3611	5.1176e-06	3.96203e-05	0.0105529	0.0807914	0.908611	LncRNA
Ast	EA	BrainMetalnc.71718	7	151936331	rs2079987	1.30619e-05	rs4726070	5.95e-13	3756	1.87956e-07	1.85258e-07	0.0343906	0.0329643	0.932645	LncRNA
Ex	AAM	ENSG00000107669	10	123499938	rs10732824	1.27235e-05	rs10887020	1.5849e-08	4361	5.95571e-05	0.000344897	0.014018	0.080273	0.905305	PCG
Ast	SCZ	ENSG00000102471	13	80055258	rs1577416	1.27024e-05	rs9545047	3.049e-11	3050	7.03912e-08	5.35024e-07	0.009143	0.0685711	0.922285	PCG
In	IQ	ENSG00000178952	16	28853731	rs8049439	1.2668e-05	rs2008514	1.246e-24	1923	3.00772e-21	2.67109e-20	0.00943296	0.0828642	0.907703	PCG
In	EA	ENSG00000094916	12	54624725	rs17110109	1.26089e-05	rs17110109	4.71e-09	3274	0.000144928	7.93239e-05	0.0205087	0.0102561	0.969011	PCG
In	MDD	BrainMetalnc.27051	16	13702866	rs12919291	1.24037e-05	rs12919291	3.092e-09	4558	2.79481e-05	3.20518e-05	0.0336695	0.0376846	0.928586	LncRNA
In	EA	ENSG00000185305	5	53179771	rs62370511	1.18145e-05	rs702606	1.12e-08	4886	0.000116846	0.000363172	0.0117427	0.0355455	0.952232	PCG
Ast	MDD	BrainMetalnc.76313	9	37079873	rs495304	1.1707e-05	rs62535714	4.686e-09	3611	5.6564e-06	3.94821e-05	0.0116639	0.0805073	0.907784	LncRNA
Oli	AAM	ENSG00000102882	16	30125425	rs28529403	1.13919e-05	rs57149692	6.22853e-11	1536	4.81982e-07	4.88137e-07	0.00886879	0.00799892	0.983131	PCG
Ex	EA	ENSG00000198218	3	49067139	rs35869135	1.08922e-05	rs13090388	4.29e-54	1695	2.22929e-50	3.22879e-49	0.00761148	0.109358	0.883031	PCG
Oli	EA	ENSG00000131966	14	58666797	rs59871969	1.02989e-05	rs1566504	3.05e-08	3928	0.000216525	0.00124631	0.0103734	0.0587796	0.929384	PCG
Ast	Neuroticism	ENSG00000283839	2	185458303	rs4389295	1.02863e-05	rs1019706	7.668e-09	3838	0.000552532	0.00129815	0.0231248	0.0534093	0.921615	LncRNA
In	SmokingInitiation	ENSG00000178074	2	200776015	rs12621809	1.00738e-05	rs2107300	3.27e-08	2551	0.000229375	0.00163408	0.0177651	0.125705	0.854667	PCG
In	EA	BrainMetalnc.77451	9	99263078	rs111821073	8.81282e-06	rs111821073	4.85e-09	3006	1.62954e-05	0.000136689	0.00927337	0.076873	0.913701	LncRNA
Oli	EA	BrainMetalnc.5371	1	175837884	rs565960	8.76753e-06	rs4652135	1.54e-10	3542	1.39256e-06	4.03818e-06	0.00539392	0.0146615	0.979939	LncRNA
In	EA	ENSG00000140943	16	84087367	rs8063919	8.75679e-06	rs34485537	5.67e-10	7930	7.03677e-05	0.000128411	0.0681461	0.123549	0.808107	PCG
Oli	EA	ENSG00000110328	11	11292423	rs7928622	8.52867e-06	rs7928622	2.52e-08	5304	0.00030966	0.00036947	0.00422907	0.00405487	0.991037	PCG
Ast	AAM	ENSG00000140382	15	77712753	rs12591335	8.26335e-06	rs62009090	4.38035e-09	3320	0.000136161	0.000559572	0.0247256	0.100739	0.873839	PCG
Ast	AAM	ENSG00000286863	1	72748852	rs11209952	7.72329e-06	rs3101336	3.91655e-15	2426	2.73291e-11	8.40247e-11	0.0167684	0.0506227	0.932609	LncRNA
Ast	MDD	ENSG00000286863	1	72748852	rs11209952	7.72329e-06	rs6699744	1.498e-18	2453	2.03108e-14	6.26153e-14	0.0140621	0.0424081	0.94353	LncRNA
Ast	EA	BrainMetalnc.59302	5	26868299	rs67383627	7.66532e-06	rs17563464	2.89e-12	4172	2.50997e-07	9.79943e-07	0.0195942	0.0755948	0.90481	LncRNA
Ex	EA	BrainMetalnc.43074	2	183033067	rs4490143	7.33192e-06	rs1527878	3.08e-09	3225	3.84018e-05	0.000138076	0.0150936	0.0533385	0.931391	LncRNA
Ex	EA	ENSG00000213047	1	197473877	rs2488389	6.86986e-06	rs12118513	7.47e-09	2718	8.7795e-05	0.000428122	0.0114303	0.0548053	0.933248	PCG
Ex	MDD	ENSG00000213047	1	197473877	rs2488389	6.86986e-06	rs17641524	1.502e-08	2559	1.74711e-05	8.50421e-05	0.00749731	0.035537	0.956863	PCG
Ex	Neuroticism	ENSG00000213047	1	197473877	rs2488389	6.86986e-06	rs2488401	3.925e-09	2707	3.60388e-05	0.000180299	0.00676869	0.032903	0.960112	PCG
Ex	SmokingInitiation	ENSG00000160917	7	99036544	rs11772470	6.79297e-06	rs12333760	1.44e-09	2267	3.16637e-06	1.37117e-05	0.0109399	0.0464317	0.942612	PCG
Ast	MDD	ENSG00000198315	6	28109660	rs853676	6.63136e-06	rs2232423	1.135e-18	2104	1.82734e-15	2.76273e-14	0.00842038	0.126442	0.865138	PCG
Ast	EA	ENSG00000143702	1	243287729	rs12091558	6.62552e-06	rs3897821	8.25e-17	3527	5.69913e-13	4.21889e-12	0.00410663	0.0294336	0.96646	PCG
In	PD	ENSG00000174514	1	205538012	rs11240569	6.56096e-06	rs823106	4.1e-10	2933	3.13901e-06	1.03293e-05	0.0332063	0.108412	0.858368	PCG
Ex	AD	ENSG00000159640	17	61554421	rs4277405	6.25157e-06	rs4292	3.474e-16	1990	1.31962e-12	2.41099e-12	0.00674873	0.0113483	0.981903	PCG
Ex	SCZ	ENSG00000159640	17	61554421	rs4277405	6.25157e-06	rs6504163	1.869e-09	1947	6.56025e-06	1.23446e-05	0.00608363	0.0104643	0.983433	PCG
Ast	Neuroticism	BrainMetalnc.18317	12	118816611	rs6490177	6.24254e-06	rs6490177	6.744e-10	4140	1.39004e-06	1.39153e-05	0.00799575	0.07913	0.912859	LncRNA
In	IQ	ENSG00000263276	16	68258615	rs8062085	6.13572e-06	rs9888986	3.517e-08	2082	0.000118286	0.00125715	0.0123637	0.130547	0.855714	LncRNA
Ex	AAM	BrainMetalnc.2933	1	72748098	rs11209948	5.71802e-06	rs3101336	3.91655e-15	2465	6.09863e-12	4.59202e-11	0.00374196	0.0272064	0.969052	LncRNA
Ex	MDD	BrainMetalnc.2933	1	72748098	rs11209948	5.71802e-06	rs6699744	1.498e-18	2492	5.71098e-15	4.29505e-14	0.00395399	0.0287695	0.967277	LncRNA
Ast	AD	ENSG00000108219	10	82213921	rs6586028	4.68135e-06	rs6586028	1.329e-14	4882	1.98069e-11	7.61121e-11	0.00512607	0.0187219	0.976152	PCG
In	AAM	ENSG00000085377	6	105721092	rs2793416	4.65861e-06	rs9391254	3.51143e-164	3352	6.76003e-159	3.26555e-158	0.0283347	0.13604	0.835625	PCG
Ast	EA	BrainMetalnc.42787	2	172637160	rs6725388	4.59506e-06	rs17428076	8.9e-10	3689	4.30556e-06	5.8115e-05	0.0133748	0.179722	0.806841	LncRNA
Ex	AD	ENSG00000103510	16	31125809	rs11865499	4.58684e-06	rs78924645	7.711e-10	1570	1.85533e-06	2.31797e-05	0.0078914	0.0976974	0.894386	PCG
In	MDD	BrainMetalnc.20345	13	80913696	rs524278	4.3237e-06	rs508502	3.556e-08	3326	0.000230493	0.000566645	0.00787174	0.018379	0.972952	LncRNA
In	EA	ENSG00000122483	1	93645475	rs7532549	4.31366e-06	rs7526112	6.1e-12	3000	6.27584e-08	8.01085e-07	0.00644501	0.0813557	0.912198	PCG
Ast	IQ	ENSG00000278311	17	34900760	rs2306593	4.17377e-06	rs2285640	2.376e-10	2609	1.55568e-06	6.19807e-06	0.00965163	0.0375008	0.95284	PCG
Ex	EA	ENSG00000171217	6	155585146	rs4869852	3.92705e-06	rs9371881	5.76e-09	4084	0.000112674	0.000121615	0.0171948	0.0175942	0.964977	PCG
In	Neuroticism	BrainMetalnc.51437	3	65440034	rs111800620	3.70438e-06	rs4405857	3.592e-08	4377	0.000115628	0.00100647	0.00436317	0.0370211	0.957494	LncRNA
In	IQ	BrainMetalnc.60718	5	87971848	rs254778	3.70206e-06	rs454214	3.071e-14	2026	1.31129e-10	7.99453e-10	0.00994862	0.0597234	0.930328	LncRNA
In	EA	BrainMetalnc.60718	5	87971848	rs254778	3.70206e-06	rs254781	2.02e-29	1978	1.72379e-25	1.12938e-24	0.00836392	0.0538605	0.937776	LncRNA
Oli	AD	BrainMetalnc.31558	17	44635012	rs7225002	3.64064e-06	rs4510068	1.366e-10	3696	2.69055e-07	1.5306e-06	0.0129458	0.0727318	0.914321	LncRNA
In	SCZ	BrainMetalnc.43391	2	198456325	rs72916919	3.58549e-06	rs2914983	1.095e-14	2542	1.59876e-11	3.73545e-10	0.00808	0.187983	0.803937	LncRNA
Ex	Neuroticism	BrainMetalnc.635	1	7825769	rs41402249	3.51897e-06	rs12137398	3.364e-09	3369	0.000144976	0.00042529	0.0164842	0.047421	0.935525	LncRNA
Oli	Neuroticism	ENSG00000006715	7	38762573	rs6974798	3.4326e-06	rs10244302	1.963e-08	4838	4.63976e-05	0.000565121	0.0108281	0.131029	0.857532	PCG
Ex	IQ	ENSG00000059691	4	152591655	rs6816292	3.41902e-06	rs6535809	6.649e-13	2432	8.73828e-10	1.84082e-08	0.00814165	0.170692	0.821166	PCG
In	AD	BrainMetalnc.31558	17	44635012	rs35732828	3.33515e-06	rs4510068	1.366e-10	3685	7.75148e-07	2.20609e-06	0.0372969	0.105291	0.857409	LncRNA
Ast	BIP	ENSG00000175115	11	65837742	rs527897	3.28172e-06	rs475805	1.991e-09	2093	1.94812e-06	2.41028e-05	0.00609621	0.0745051	0.919373	PCG
Ast	AAM	ENSG00000155906	6	151725896	rs9397403	3.08579e-06	rs1553002	2.37696e-09	4732	2.19133e-05	0.000114845	0.0311819	0.162614	0.806067	PCG
In	SmokingInitiation	ENSG00000144460	2	226264425	rs7425169	3.06686e-06	rs4674993	1.32e-08	3847	9.05937e-05	0.000842998	0.0106964	0.0986435	0.889727	PCG
Ex	AAM	BrainMetalnc.77798	9	111874921	rs75742991	3.01514e-06	rs72607161	3.33705e-12	4881	8.40956e-09	9.54323e-08	0.0140419	0.158521	0.827437	LncRNA
Ex	EA	BrainMetalnc.77798	9	111874921	rs75742991	3.01514e-06	rs1051474	4.86e-12	4936	1.49225e-08	1.69604e-07	0.00492396	0.0550239	0.940052	LncRNA
Oli	PD	ENSG00000287502	3	57541307	rs4488803	2.97737e-06	rs4488803	1.076e-08	4023	1.34417e-05	1.97147e-05	0.00140532	0.00106366	0.997498	LncRNA
In	IQ	BrainMetalnc.39681	2	44119117	rs4952693	2.96261e-06	rs2955280	4.9e-08	4406	0.000303089	0.00376929	0.0136641	0.169117	0.813147	LncRNA
Ex	IQ	ENSG00000160957	8	145736670	rs2721173	2.94588e-06	rs2721173	2.887e-09	1431	6.91683e-06	5.96658e-05	0.00263434	0.0217487	0.97555	PCG
Ex	EA	ENSG00000160957	8	145736670	rs2721173	2.94588e-06	rs11774212	2.74e-12	1468	4.85244e-08	4.7781e-07	0.00496735	0.0479655	0.947067	PCG
Ex	BIP	ENSG00000166716	15	85291822	rs12904605	2.68348e-06	rs748455	5.011e-11	3745	4.63595e-08	7.4499e-07	0.00925487	0.147882	0.842863	PCG
Ex	SCZ	ENSG00000166716	15	85291822	rs12904605	2.68348e-06	rs11638554	3.618e-13	3741	3.47697e-10	5.58732e-09	0.00623121	0.0992379	0.894531	PCG
Ex	AAM	ENSG00000102882	16	30125425	rs6565175	2.60196e-06	rs57149692	6.22853e-11	1534	1.17773e-07	4.88325e-07	0.00216711	0.00799567	0.989837	PCG
Ast	EA	ENSG00000285940	18	35145243	rs1557341	2.53173e-06	rs9964724	2.66e-27	3623	7.27512e-23	9.22226e-22	0.00959388	0.120747	0.86966	LncRNA
Ast	MDD	ENSG00000285940	18	35145243	rs1557341	2.53173e-06	rs4799949	1.403e-10	3669	4.88846e-07	6.20527e-06	0.00471838	0.0589574	0.936318	LncRNA
Ast	Neuroticism	ENSG00000285940	18	35145243	rs1557341	2.53173e-06	rs6507216	1.903e-20	3608	9.60199e-17	1.22811e-15	0.00267356	0.033231	0.964095	LncRNA
Oli	PD	BrainMetalnc.51280	3	57541307	rs4488803	2.47131e-06	rs4488803	1.076e-08	4023	1.12969e-05	1.84174e-05	0.00118109	0.000927674	0.997862	LncRNA
Oli	EA	ENSG00000211455	12	27396900	rs4964050	2.46706e-06	rs4964046	3.36e-09	4460	2.38992e-06	6.9459e-05	0.00301825	0.0868101	0.9101	PCG
In	EA	BrainMetalnc.64419	6	33267635	rs1800837	2.40674e-06	rs1061801	8.34e-10	2840	2.63129e-05	4.88688e-05	0.00816414	0.014185	0.977576	LncRNA
Ast	EA	ENSG00000100461	14	23362412	rs2008951	2.29105e-06	rs1043209	4.22e-15	4573	8.18904e-12	1.51494e-10	0.00427044	0.078084	0.917646	PCG
In	Neuroticism	BrainMetalnc.40165	2	64203282	rs72806027	2.27622e-06	rs72806056	4.116e-08	2803	0.000171115	0.00433373	0.00735665	0.185515	0.802623	LncRNA
Ex	Neuroticism	ENSG00000180596	6	26115100	rs7753826	2.24755e-06	rs198825	4.264e-09	4313	4.19126e-05	0.000219141	0.0150221	0.0776364	0.90708	PCG
Ast	ALS	ENSG00000153179	12	64900780	rs1317534	2.24058e-06	rs61931525	1.123e-08	2722	1.90829e-05	8.28368e-05	0.0259337	0.111713	0.862251	PCG
Ex	SmokingInitiation	ENSG00000243477	3	50333832	rs2526398	2.11887e-06	rs12632110	4.78e-10	2100	1.79588e-06	1.60701e-05	0.00550182	0.048286	0.946194	PCG
In	EA	BrainMetalnc.74919	8	130880252	rs2624810	2.09369e-06	rs837080	1.43e-10	4292	6.88311e-07	9.20145e-06	0.00478787	0.0630729	0.932129	LncRNA
In	IQ	ENSG00000112893	5	109025627	rs7716761	2.08589e-06	rs1438660	3.521e-08	4043	0.000150846	0.000680586	0.0192788	0.0860881	0.893802	PCG
In	EA	ENSG00000112893	5	109025627	rs7716761	2.08589e-06	rs17489649	1.57e-14	3934	2.51292e-10	1.08872e-09	0.0220357	0.0945864	0.883378	PCG
In	BIP	ENSG00000064726	15	83685174	rs115583906	2.0206e-06	rs62011709	1.433e-08	2196	6.35369e-06	0.000111697	0.00221164	0.0379206	0.95975	PCG
In	EA	ENSG00000108306	17	37408915	rs12947281	2.00676e-06	rs7215889	7.06e-09	2721	1.38149e-06	0.000132311	0.00207121	0.197567	0.800228	PCG
Ex	EA	BrainMetalnc.6414	1	212492914	rs10863952	1.9037e-06	rs71646142	3.11e-09	3409	3.70857e-05	0.000542296	0.0106847	0.155407	0.833329	LncRNA
In	AAM	ENSG00000107669	10	123499938	rs870947	1.75784e-06	rs10887020	1.5849e-08	4391	8.50499e-05	0.000509145	0.0200183	0.118978	0.86041	PCG
In	EA	ENSG00000211455	12	27396900	rs922275	1.68654e-06	rs4964046	3.36e-09	4424	1.02489e-06	4.96793e-05	0.00129437	0.0618047	0.93685	PCG
In	IQ	BrainMetalnc.9768	10	93757403	rs7909492	1.59128e-06	rs1891273	3.168e-08	2866	0.000143673	0.00466536	0.00547798	0.177069	0.812644	LncRNA
In	SCZ	ENSG00000157895	12	121440315	rs7135337	1.52412e-06	rs2649999	1.282e-09	3292	1.71319e-05	0.000193076	0.0107354	0.120118	0.868937	PCG
Ast	EA	ENSG00000255468	11	66115420	rs10219183	1.47526e-06	rs76878669	8.67e-12	1861	1.50557e-07	1.06872e-06	0.00314645	0.0213594	0.975493	LncRNA
Ex	EA	ENSG00000159199	17	46970126	rs613495	1.46328e-06	rs9914918	8.9e-10	3120	5.58646e-06	4.99199e-05	0.0184575	0.164117	0.81737	PCG
Ast	EA	BrainMetalnc.7303	1	243304345	rs6669104	1.40141e-06	rs3897821	8.25e-17	3520	4.32545e-13	1.68787e-11	0.00311652	0.120736	0.876147	LncRNA
Ast	EA	ENSG00000016391	3	53847760	rs3774614	1.3635e-06	rs3796348	3.66e-09	3546	3.14202e-05	0.000324854	0.00984118	0.100859	0.888943	PCG
Ast	Neuroticism	ENSG00000104447	8	116420723	rs2049865	1.30934e-06	rs2737219	2.796e-08	2795	5.09746e-05	0.00169778	0.00122549	0.0398593	0.957166	PCG
In	EA	ENSG00000072736	16	68118653	rs4627335	1.26589e-06	rs35316276	1.52e-09	2013	7.35935e-05	0.000174026	0.0139905	0.0321295	0.953632	PCG
Ast	AD	ENSG00000174226	8	101585116	rs1786345	1.24359e-06	rs1693551	1.785e-08	2891	2.64669e-05	0.000183038	0.00381107	0.0253857	0.970594	PCG
In	IQ	ENSG00000103479	16	53467888	rs61400540	1.20141e-06	rs8054299	3.841e-15	3638	1.11098e-11	4.06729e-10	0.00251008	0.0909872	0.906503	PCG
In	EA	ENSG00000103479	16	53467888	rs61400540	1.20141e-06	rs3809634	1.09e-08	3742	1.05058e-05	0.000422021	0.0023992	0.095475	0.901693	PCG
Ex	IQ	ENSG00000083812	19	58978411	rs2003103	1.16093e-06	rs73068339	5.955e-10	2109	7.30864e-06	6.30125e-05	0.0165401	0.141761	0.841628	PCG
Ast	EA	ENSG00000128595	7	128379345	rs339094	1.12987e-06	rs339054	5.9e-12	3226	1.55042e-08	6.04868e-07	0.00111719	0.042629	0.956253	PCG
Ex	SCZ	ENSG00000182858	22	50293876	rs138876	1.09263e-06	rs6010045	1.815e-08	5542	3.35514e-06	0.000347528	0.00144906	0.149246	0.848954	PCG
Ex	AAM	BrainMetalnc.71965	7	157955139	rs73176107	1.0621e-06	rs67764605	1.339e-08	4732	3.44284e-06	0.000290936	0.00163327	0.137158	0.860914	LncRNA
Oli	PD	ENSG00000166582	17	16245847	rs4792721	1.03337e-06	rs4566208	3.884e-08	2865	2.44774e-06	0.000122077	0.00367847	0.182644	0.813553	PCG
Oli	EA	BrainMetalnc.73146	8	42283254	rs7832886	1.02835e-06	rs2923431	9.84e-11	2389	2.43846e-07	2.82918e-06	0.00640875	0.0734363	0.920152	LncRNA
Ast	SCZ	ENSG00000065609	6	84262598	rs2207944	9.45832e-07	rs2022265	3.739e-10	2870	6.98124e-08	1.84158e-06	0.00172949	0.0446684	0.9536	PCG
In	SCZ	BrainMetalnc.25844	15	85331675	rs609513	9.39941e-07	rs11638554	3.618e-13	3813	3.78953e-10	8.0451e-09	0.00679137	0.143329	0.849879	LncRNA
Oli	IQ	ENSG00000196666	11	47608229	rs12803191	9.0288e-07	rs11605348	9.728e-09	2660	1.71039e-06	0.00017187	0.000750111	0.0744512	0.924625	PCG
Oli	IQ	ENSG00000254081	8	66438972	rs869151	8.95025e-07	rs13276212	4.478e-08	3236	8.61951e-05	0.00170223	0.00889873	0.174923	0.81439	LncRNA
In	AD	BrainMetalnc.54572	4	878375	rs6837528	7.47293e-07	rs3822030	5.036e-10	3457	2.11312e-06	1.20795e-05	0.00227262	0.0120055	0.985708	LncRNA
Oli	EA	ENSG00000180376	3	56591188	rs34557920	7.35765e-07	rs7625428	1.26e-08	3614	5.28191e-05	0.000546086	0.00272911	0.0272463	0.969426	PCG
In	PD	ENSG00000136235	7	23275585	rs1728292	7.28825e-07	rs858295	3.831e-09	4367	6.55723e-07	1.29746e-05	0.00356519	0.0696168	0.926804	PCG
In	BIP	ENSG00000226476	1	60981387	rs7522454	7.27271e-07	rs2126180	1.621e-09	2833	3.84373e-07	1.24629e-05	0.00431279	0.138981	0.856693	LncRNA
In	AAM	ENSG00000105127	19	15464195	rs929613	7.22866e-07	rs7245841	3.74141e-08	5340	8.06265e-06	0.000368252	0.00140927	0.0634322	0.934782	PCG
In	BIP	ENSG00000185630	1	164524820	rs12035005	7.19248e-07	rs10737496	7.172e-09	3835	1.53258e-06	7.76755e-05	0.00142361	0.0712253	0.927272	PCG
In	AAM	ENSG00000198785	9	104331633	rs729688	7.15246e-07	rs10819973	3.85539e-08	4745	2.98545e-05	0.000800365	0.00273865	0.072496	0.923935	PCG
Ex	EA	BrainMetalnc.18393	12	120916158	rs61945858	7.06374e-07	rs1671770	1.91e-09	3524	2.56821e-06	5.87987e-05	0.0019425	0.0435188	0.954477	LncRNA
Oli	IQ	BrainMetalnc.73583	8	66438653	rs869151	6.97687e-07	rs13276212	4.478e-08	3236	8.23593e-05	0.00174842	0.00850273	0.179696	0.80997	LncRNA
Ast	BIP	ENSG00000197696	15	85198359	rs11637728	6.91366e-07	rs748455	5.011e-11	3676	1.38671e-08	7.34361e-07	0.00276834	0.145751	0.85148	PCG
Ast	SCZ	ENSG00000197696	15	85198359	rs11637728	6.91366e-07	rs11638554	3.618e-13	3672	1.00926e-10	5.34469e-09	0.00180873	0.0948808	0.90331	PCG
Ast	IQ	BrainMetalnc.77450	9	99257223	rs10820745	6.79475e-07	rs1057687	2.02e-08	2972	2.80779e-06	0.000177936	0.00138669	0.0869666	0.911466	LncRNA
Ex	AAM	ENSG00000112701	6	76311224	rs12212816	6.73445e-07	rs111477662	1.13227e-09	2977	6.82688e-08	1.09448e-05	0.000599263	0.0951693	0.90422	PCG
Ast	EA	BrainMetalnc.44189	2	226538477	rs13006578	6.72349e-07	rs12694681	9.06e-10	3633	5.52992e-07	2.86951e-05	0.000681099	0.0343777	0.964912	LncRNA
In	EA	ENSG00000136436	17	46908387	rs6504584	6.47562e-07	rs9914918	8.9e-10	3188	1.36641e-06	4.05937e-05	0.00451444	0.133254	0.86219	PCG
In	MDD	BrainMetalnc.5380	1	176176662	rs34104622	6.41665e-07	rs10913112	4.525e-09	3384	1.22305e-06	0.000100117	0.00121758	0.0987687	0.899912	LncRNA
Ast	Neuroticism	ENSG00000006715	7	38762573	rs28552512	5.96549e-07	rs10244302	1.963e-08	4826	7.28077e-06	0.000334492	0.00169925	0.0771458	0.920813	PCG
Ex	Neuroticism	BrainMetalnc.14854	11	133802131	rs329648	5.93263e-07	rs167915	1.688e-08	4411	0.000430885	0.00560697	0.00629838	0.0810523	0.906612	LncRNA
Ex	PD	BrainMetalnc.14854	11	133802131	rs329648	5.93263e-07	rs329647	1.944e-10	4721	5.9187e-08	7.71748e-07	0.000773592	0.00909686	0.990129	LncRNA
Ex	EA	BrainMetalnc.9007	10	64936773	rs7910951	5.90169e-07	rs7924036	1.07e-18	3637	1.51352e-14	1.0918e-12	0.0023997	0.17228	0.82532	LncRNA
Oli	SCZ	ENSG00000133687	12	29653772	rs721617	5.79993e-07	rs7312697	4.849e-11	5576	1.68479e-08	3.17146e-07	0.00107622	0.0192792	0.979644	PCG
In	EA	ENSG00000110328	11	11292423	rs7928622	5.6308e-07	rs7928622	2.52e-08	5299	2.34673e-05	0.000296682	0.000320498	0.00305555	0.996304	PCG
Ex	IQ	ENSG00000010165	1	171750799	rs2232825	5.5679e-07	rs34320898	2.696e-09	4163	1.07933e-05	0.000444254	0.00165834	0.0673269	0.93056	PCG
Ast	SmokingInitiation	ENSG00000076685	10	104850367	rs11191435	5.34333e-07	rs12356821	6.27e-15	2866	8.6836e-12	4.68642e-10	0.00266828	0.143149	0.854182	PCG
In	IQ	BrainMetalnc.12363	11	47622447	rs10838724	5.31515e-07	rs11605348	9.728e-09	2675	5.52578e-06	0.00013852	0.00242276	0.0597958	0.937637	LncRNA
Ast	SCZ	ENSG00000205981	3	180701496	rs7617548	5.0849e-07	rs7647398	2.207e-17	2312	2.0278e-15	1.73687e-13	0.00110675	0.0938909	0.905002	PCG
Ast	EA	BrainMetalnc.25848	15	85449429	rs11259919	4.82578e-07	rs11259919	9.31e-09	3882	6.43487e-06	0.000218943	0.000385784	0.0121388	0.98725	LncRNA
In	IQ	ENSG00000128268	22	39853016	rs5750823	4.81395e-07	rs5750830	2.459e-13	2816	1.04747e-10	1.03387e-08	0.000423471	0.0408384	0.958738	PCG
Oli	PD	ENSG00000214941	17	15879873	rs2324082	4.672e-07	rs4566208	3.884e-08	3164	2.22454e-06	0.000115923	0.00334312	0.17339	0.823149	PCG
In	AAM	ENSG00000184792	22	31089768	rs7288964	4.65192e-07	rs5753407	4.64713e-09	3113	1.2129e-06	6.72238e-05	0.00183752	0.100946	0.897148	PCG
In	IQ	ENSG00000184792	22	31089768	rs7288964	4.65192e-07	rs5753383	4.998e-08	3058	7.88411e-06	0.000429465	0.00137189	0.0738054	0.924385	PCG
Ast	EA	ENSG00000130024	6	170105228	rs7750758	4.33733e-07	rs3800546	9.73e-10	4670	1.13021e-06	5.74968e-05	0.0017777	0.0895272	0.908636	PCG
Ast	PD	ENSG00000136243	7	23221445	rs955187	4.26115e-07	rs858295	3.831e-09	4275	2.29034e-07	1.14422e-05	0.00124526	0.0612741	0.937469	PCG
In	AAM	BrainMetalnc.23202	14	93873165	rs1242761	4.14361e-07	rs1115897	1.93532e-10	4296	2.23618e-08	2.43128e-06	0.000919417	0.0990634	0.900015	LncRNA
Ex	BIP	ENSG00000197696	15	85198359	rs17598114	4.08971e-07	rs748455	5.011e-11	3662	4.65673e-09	7.7044e-07	0.000929635	0.152959	0.846111	PCG
Ex	SCZ	ENSG00000197696	15	85198359	rs17598114	4.08971e-07	rs11638554	3.618e-13	3658	4.33268e-11	7.16825e-09	0.000776476	0.127593	0.87163	PCG
In	ALS	ENSG00000092108	14	31091496	rs10130830	4.07564e-07	rs229243	5.409e-15	2652	3.11027e-13	2.92563e-11	0.000722871	0.0670634	0.932214	PCG
Ex	AAM	BrainMetalnc.48525	22	31291210	rs1017066	4.07259e-07	rs5753407	4.64713e-09	2943	2.81772e-06	9.684e-05	0.00426974	0.145894	0.849737	LncRNA
Ex	IQ	BrainMetalnc.48525	22	31291210	rs1017066	4.07259e-07	rs5753383	4.998e-08	2905	1.20653e-05	0.000414543	0.00209994	0.0712242	0.926249	LncRNA
In	AAM	ENSG00000112701	6	76311224	rs72888734	3.7038e-07	rs111477662	1.13227e-09	2943	8.25946e-08	1.19005e-05	0.000725013	0.103566	0.895697	PCG
Ast	AD	ENSG00000145217	4	972860	rs3822020	3.69819e-07	rs3822030	5.036e-10	3481	1.17369e-06	2.4604e-05	0.00126229	0.0254879	0.973224	PCG
Ex	SCZ	ENSG00000204520	6	31367560	rs12175489	3.67484e-07	rs9267091	1.652e-10	727	2.02132e-06	2.62306e-05	0.00857381	0.110381	0.881017	PCG
In	AAM	BrainMetalnc.69738	7	74047306	rs2529287	3.63348e-07	rs35005436	3.74827e-16	1298	3.43028e-11	2.17359e-10	0.0235687	0.148515	0.827917	LncRNA
In	EA	ENSG00000146834	7	100026439	rs11763511	3.27719e-07	rs2406253	6.4e-11	2383	5.83205e-09	2.21055e-06	0.000204051	0.0764189	0.923375	PCG
Ast	PD	ENSG00000004468	4	15779897	rs4389574	3.20267e-07	rs4698412	7.049e-14	4196	7.5916e-12	1.97253e-10	0.000248213	0.00545506	0.994297	PCG
Oli	AAM	ENSG00000174938	16	29882479	rs28529403	3.16456e-07	rs57149692	6.22853e-11	1484	1.70998e-08	4.86593e-07	0.000314499	0.00795768	0.991727	PCG
Ex	EA	ENSG00000130024	6	170105228	rs7750758	2.97297e-07	rs3800546	9.73e-10	4683	1.1061e-06	5.3272e-05	0.00173978	0.0828755	0.91533	PCG
Ast	IQ	ENSG00000109919	11	47638866	rs10838724	2.77262e-07	rs11605348	9.728e-09	2756	1.79214e-06	0.000292026	0.000785601	0.12714	0.87178	PCG
In	SmokingInitiation	ENSG00000076685	10	104850367	rs11191458	2.73722e-07	rs12356821	6.27e-15	2858	1.28991e-12	2.35507e-10	0.000396362	0.0714381	0.928166	PCG
Oli	EA	ENSG00000100461	14	23362412	rs2295685	2.62607e-07	rs1043209	4.22e-15	4569	3.08283e-13	1.02851e-10	0.000160765	0.0526878	0.947151	PCG
In	BIP	BrainMetalnc.10325	10	111689318	rs1349348	2.61737e-07	rs2273738	1.627e-11	3481	3.86109e-09	2.58802e-07	0.00243924	0.162663	0.834898	LncRNA
Ast	IQ	BrainMetalnc.77451	9	99263078	rs7031988	2.57107e-07	rs1057687	2.02e-08	2965	1.3019e-06	0.000320533	0.000619167	0.151594	0.847465	LncRNA
Ast	EA	BrainMetalnc.77451	9	99263078	rs7031988	2.57107e-07	rs111821073	4.85e-09	3008	6.58624e-07	0.000159476	0.00037481	0.089845	0.90962	LncRNA
Ex	AAM	ENSG00000089101	20	20037261	rs6075647	2.54326e-07	rs3828002	2.54795e-09	3443	8.43711e-06	8.12444e-05	0.00877427	0.0835836	0.907552	PCG
Ex	EA	ENSG00000285940	18	35145243	rs11877758	2.47803e-07	rs9964724	2.66e-27	3624	1.78379e-24	1.85195e-22	0.000235236	0.0234461	0.976319	LncRNA
Ex	MDD	ENSG00000285940	18	35145243	rs11877758	2.47803e-07	rs4799949	1.403e-10	3670	3.08579e-08	3.20395e-06	0.000297843	0.0299551	0.969744	LncRNA
Ex	Neuroticism	ENSG00000285940	18	35145243	rs11877758	2.47803e-07	rs6507216	1.903e-20	3609	1.64824e-17	1.71239e-15	0.000458914	0.0467246	0.952817	LncRNA
Oli	IQ	ENSG00000181915	10	64564479	rs58195665	2.37027e-07	rs2393967	2.695e-10	3273	2.10538e-06	5.63431e-05	0.0062671	0.16689	0.826785	PCG
In	EA	BrainMetalnc.44189	2	226538477	rs2017444	2.2846e-07	rs12694681	9.06e-10	3600	3.10792e-07	2.95826e-05	0.000382123	0.0354079	0.96418	LncRNA
Ast	IQ	ENSG00000163431	1	201865583	rs4950743	2.11529e-07	rs2678210	6.97e-10	3680	4.5139e-07	3.02385e-05	0.000472951	0.0307141	0.968782	PCG
Ast	EA	ENSG00000163431	1	201865583	rs4950743	2.11529e-07	rs2820314	9.34e-10	3747	4.5451e-07	3.02031e-05	0.00111812	0.0733759	0.925475	PCG
In	BIP	BrainMetalnc.2707	1	60808142	rs2989477	2.07089e-07	rs2126180	1.621e-09	2727	3.58746e-08	6.94708e-06	0.000402524	0.0770259	0.922565	LncRNA
Oli	SCZ	ENSG00000110881	12	50451330	rs10875996	1.91582e-07	rs578470	2.327e-08	2407	2.2383e-05	0.00191161	0.0019294	0.163947	0.83219	PCG
Ast	SCZ	BrainMetalnc.36474	19	19618760	rs2905425	1.80786e-07	rs1858999	7.971e-14	2881	1.76015e-11	1.69096e-09	0.00176295	0.168535	0.829702	LncRNA
In	AAM	ENSG00000112210	6	57054631	rs6927558	1.78331e-07	rs13207800	2.05696e-15	2697	1.94324e-13	4.05373e-11	0.000466626	0.0964384	0.903095	PCG
Ast	IQ	ENSG00000188338	3	50242678	rs2236940	1.70332e-07	rs2352974	3.691e-29	2043	9.51254e-26	1.61196e-23	0.000536261	0.0899635	0.9095	PCG
Ast	SmokingInitiation	ENSG00000188338	3	50242678	rs2236940	1.70332e-07	rs12632110	4.78e-10	2082	1.5135e-07	2.68946e-05	0.000464619	0.0816438	0.917865	PCG
Ast	AAM	ENSG00000105948	7	138818489	rs11525873	1.54458e-07	rs13233916	1.3837e-09	3322	3.47253e-07	5.56778e-06	0.000136903	0.00119641	0.998661	PCG
Ast	BIP	BrainMetalnc.78978	9	140993686	rs10867106	1.53304e-07	rs10867108	4.148e-08	806	4.93236e-05	0.0017857	0.00228057	0.081651	0.914233	LncRNA
Ast	BIP	ENSG00000114904	3	52745164	rs11130324	1.46875e-07	rs2336147	3.615e-13	2438	1.675e-11	1.49538e-09	0.000268788	0.0230197	0.976712	PCG
Ast	SCZ	ENSG00000114904	3	52745164	rs11130324	1.46875e-07	rs2710323	5.916e-22	2384	1.42099e-19	1.26856e-17	0.000245966	0.0209793	0.978775	PCG
In	EA	BrainMetalnc.30384	17	17678881	rs4925109	1.44471e-07	rs11655029	2.84e-09	2700	8.65713e-07	4.66486e-05	0.0001611	0.00768869	0.992103	LncRNA
Oli	EA	BrainMetalnc.39948	2	55568689	rs2589056	1.38306e-07	rs1437394	3.26e-08	4119	4.34682e-06	0.0018192	0.000355525	0.147942	0.849879	LncRNA
Ex	SCZ	BrainMetalnc.65509	6	84320511	rs217286	1.19707e-07	rs2022265	3.739e-10	2864	6.49842e-09	2.107e-06	0.000160988	0.051249	0.948588	LncRNA
In	AD	ENSG00000174226	8	101585116	rs1693568	1.18511e-07	rs1693551	1.785e-08	2907	6.20738e-07	6.15241e-05	8.93824e-05	0.00786711	0.991981	PCG
Ex	EA	BrainMetalnc.69768	7	74621709	rs809439	1.12984e-07	rs1167827	2.31e-08	1522	1.01781e-05	0.000985397	0.00024337	0.0225858	0.976175	LncRNA
In	AAM	ENSG00000137764	15	67835040	rs2899730	1.05982e-07	rs12914773	1.28714e-12	3752	1.6426e-10	4.57243e-08	0.000678233	0.187985	0.811337	PCG
Oli	AAM	ENSG00000173517	15	77392997	rs12901130	1.05731e-07	rs62009090	4.38035e-09	3274	1.36519e-06	0.000197263	0.000248004	0.0348704	0.964683	PCG
Ast	SCZ	BrainMetalnc.25764	15	83022578	rs6603033	9.73944e-08	rs4779050	4.175e-10	1958	1.03116e-08	5.85022e-06	0.000125883	0.0704898	0.929378	LncRNA
Ex	SmokingInitiation	ENSG00000166275	10	104614015	rs4919690	9.06456e-08	rs12356821	6.27e-15	2681	2.45487e-12	2.40949e-10	0.000754327	0.0731123	0.926133	PCG
In	SmokingInitiation	ENSG00000112144	6	52866076	rs76653190	8.21425e-08	rs222449	1.08e-08	4328	5.08484e-06	0.000216905	0.00114847	0.0480401	0.950589	PCG
In	IQ	ENSG00000010165	1	171750799	rs12750330	7.79088e-08	rs34320898	2.696e-09	4168	2.79535e-06	0.00038337	0.000429492	0.0579617	0.941223	PCG
Ast	BIP	ENSG00000185630	1	164524820	rs2345964	7.62201e-08	rs10737496	7.172e-09	3857	1.12198e-07	1.9896e-05	0.00010422	0.017499	0.982377	PCG
In	SCZ	ENSG00000170802	2	48541775	rs79247094	6.41464e-08	rs12713008	3.047e-08	4516	4.28906e-06	0.0002751	0.000327799	0.0200457	0.979347	PCG
In	EA	ENSG00000090432	1	20825940	rs12070795	6.31942e-08	rs74701752	2.38e-08	3871	1.8631e-05	0.00281121	0.00125136	0.188008	0.80791	PCG
Oli	AAM	ENSG00000145029	3	49459765	rs7631586	6.10502e-08	rs4955427	5.31666e-14	1658	2.37626e-12	1.85039e-09	0.000145756	0.112612	0.887242	PCG
In	EA	BrainMetalnc.31651	17	46880000	rs962273	5.92723e-08	rs9914918	8.9e-10	3245	1.62752e-07	4.0942e-05	0.000537754	0.134413	0.865008	LncRNA
Oli	SmokingInitiation	BrainMetalnc.66203	6	111658588	rs240991	5.63482e-08	rs240963	2.16e-17	3545	6.0222e-15	1.34078e-12	0.00084808	0.188005	0.811147	LncRNA
In	AAM	ENSG00000286863	1	72748852	rs6699744	5.35467e-08	rs3101336	3.91655e-15	2426	3.12216e-13	8.82541e-11	0.000191568	0.0532037	0.946605	LncRNA
In	MDD	ENSG00000286863	1	72748852	rs6699744	5.35467e-08	rs6699744	1.498e-18	2453	1.83725e-16	5.19322e-14	0.000127202	0.0349903	0.964882	LncRNA
Ex	AD	ENSG00000145214	4	952674	rs28671147	5.25585e-08	rs3822030	5.036e-10	3491	1.97714e-07	3.31808e-05	0.000212638	0.0347203	0.965034	PCG
In	BIP	ENSG00000168496	11	61560382	rs174592	5.02117e-08	rs174592	9.924e-14	2802	4.15468e-12	6.89384e-10	0.000101906	0.0159251	0.983973	PCG
In	SCZ	BrainMetalnc.71312	7	138912269	rs7804738	4.93544e-08	rs10243922	1.016e-08	3298	1.27464e-05	0.000788181	0.00123454	0.0754165	0.922548	LncRNA
In	IQ	BrainMetalnc.28391	16	62070322	rs72787533	4.90596e-08	rs12446238	4.804e-09	3056	7.28351e-07	0.000129926	0.000418609	0.0737474	0.925703	LncRNA
Oli	EA	BrainMetalnc.78077	9	123348744	rs2900177	4.88282e-08	rs2416759	1.38e-08	2749	4.6635e-06	0.00288679	0.000239403	0.147345	0.849524	LncRNA
In	IQ	BrainMetalnc.77450	9	99257223	rs10820745	4.78734e-08	rs1057687	2.02e-08	2969	3.13359e-07	0.000172381	0.00015476	0.0842194	0.915453	LncRNA
In	IQ	BrainMetalnc.55259	4	17811315	rs6817306	4.25211e-08	rs11932971	5.462e-13	3816	1.12774e-11	1.59308e-08	0.000108304	0.152146	0.847746	LncRNA
In	Neuroticism	BrainMetalnc.629	1	7769443	rs12119962	4.18492e-08	rs12137398	3.364e-09	3446	2.22773e-06	0.000435969	0.000252475	0.0484587	0.950851	LncRNA
In	SCZ	ENSG00000065609	6	84262598	rs2207944	3.99842e-08	rs2022265	3.739e-10	2833	2.91294e-09	1.55926e-06	7.21632e-05	0.0376659	0.96226	PCG
In	Neuroticism	ENSG00000172059	2	10182975	rs11687357	3.74142e-08	rs4396680	2.588e-09	5100	4.97993e-07	0.000204791	4.77967e-05	0.0186745	0.981072	PCG
Ex	MDD	ENSG00000169213	1	52373627	rs2783179	3.70539e-08	rs7551758	5.107e-11	1848	7.76206e-09	3.11158e-06	0.000194554	0.0770681	0.922734	PCG
Ex	AD	ENSG00000178226	16	31150246	rs78924645	3.65248e-08	rs78924645	7.711e-10	1554	1.51806e-08	2.86166e-06	6.45681e-05	0.0111829	0.98875	PCG
In	EA	BrainMetalnc.69768	7	74621709	rs1167836	3.50517e-08	rs1167827	2.31e-08	1512	2.03018e-05	0.00241209	0.000485457	0.0567377	0.940344	LncRNA
Ex	EA	ENSG00000110328	11	11292423	rs10831656	3.48214e-08	rs7928622	2.52e-08	5304	2.88236e-06	0.000199289	3.93648e-05	0.00172367	0.998035	PCG
Ast	IQ	ENSG00000100116	22	38203911	rs8140423	3.36245e-08	rs4396807	3.582e-08	3454	2.28383e-06	0.00101638	0.00016076	0.070615	0.928206	PCG
In	EA	BrainMetalnc.12988	11	66115123	rs8187658	3.28744e-08	rs76878669	8.67e-12	1855	1.88423e-09	8.79004e-07	3.9375e-05	0.0173861	0.982574	LncRNA
Ast	EA	ENSG00000152944	12	27175478	rs11048880	3.24048e-08	rs4964046	3.36e-09	4433	3.50234e-08	5.2769e-05	4.42216e-05	0.0656934	0.93421	PCG
Oli	IQ	ENSG00000196586	6	76458908	rs28619506	3.08423e-08	rs1280049	3.919e-08	2951	1.25773e-06	0.000629352	0.000121878	0.0600467	0.939201	PCG
Ex	AAM	ENSG00000172262	5	43067682	rs35953019	3.08189e-08	rs35375873	3.3644e-12	2841	2.15341e-09	5.6836e-07	0.000372322	0.0973667	0.90226	PCG
In	AAM	ENSG00000140382	15	77712753	rs1022172	2.99972e-08	rs62009090	4.38035e-09	3308	7.20171e-07	0.000567059	0.000130776	0.102075	0.897226	PCG
Ex	IQ	BrainMetalnc.75363	8	145732129	rs10108836	2.83595e-08	rs2721173	2.887e-09	1436	7.68665e-07	0.000204933	0.000292761	0.0771303	0.922371	LncRNA
Ast	IQ	ENSG00000087053	11	95554929	rs518919	2.81721e-08	rs2508713	5.916e-09	3012	8.64157e-08	0.000107716	0.000118585	0.146962	0.852812	PCG
Ast	EA	ENSG00000087053	11	95554929	rs518919	2.81721e-08	rs10765775	2.62e-17	3061	9.55257e-16	1.19425e-12	4.90444e-05	0.0603749	0.939576	PCG
In	IQ	ENSG00000081377	9	99253618	rs10990975	2.75447e-08	rs1057687	2.02e-08	2970	3.38521e-07	0.000263281	0.000167187	0.129158	0.870411	PCG
In	EA	ENSG00000081377	9	99253618	rs10990975	2.75447e-08	rs111821073	4.85e-09	3014	2.21759e-07	0.000171141	0.0001262	0.0964909	0.903212	PCG
Oli	EA	BrainMetalnc.51164	3	53073653	rs62255898	2.41021e-08	rs3796348	3.66e-09	2729	6.40469e-07	0.000515257	0.000200577	0.160526	0.838758	LncRNA
In	IQ	BrainMetalnc.73587	8	66640981	rs10106749	2.25279e-08	rs13276212	4.478e-08	2996	1.4877e-06	0.00127624	0.000153567	0.130871	0.867697	LncRNA
Ast	AAM	BrainMetalnc.19219	13	28011410	rs11619784	2.07545e-08	rs4771121	1.17813e-09	4483	2.79027e-08	2.74029e-05	4.94525e-05	0.0476144	0.952309	LncRNA
Ast	IQ	BrainMetalnc.73585	8	66502321	rs4737749	2.03978e-08	rs13276212	4.478e-08	3134	8.20916e-07	0.0018404	8.48814e-05	0.189486	0.808588	LncRNA
In	EA	ENSG00000016391	3	53847760	rs7626693	2.02866e-08	rs3796348	3.66e-09	3558	9.70634e-07	0.000366855	0.000304015	0.114018	0.88531	PCG
In	IQ	ENSG00000087053	11	95554929	rs7110786	1.92317e-08	rs2508713	5.916e-09	3010	2.03003e-08	7.26434e-05	2.78572e-05	0.0987844	0.901115	PCG
In	EA	ENSG00000087053	11	95554929	rs7110786	1.92317e-08	rs10765775	2.62e-17	3059	5.12018e-16	1.84042e-12	2.62879e-05	0.0935837	0.90639	PCG
In	Neuroticism	BrainMetalnc.60717	5	87970061	rs7721099	1.5417e-08	rs1501673	3.412e-10	2046	7.08817e-09	4.2075e-06	4.15918e-05	0.0237124	0.976242	LncRNA
In	BIP	ENSG00000166716	15	85291822	rs35828350	1.4718e-08	rs748455	5.011e-11	3758	4.08115e-10	6.07378e-07	8.1473e-05	0.120373	0.879545	PCG
In	SCZ	ENSG00000166716	15	85291822	rs35828350	1.4718e-08	rs11638554	3.618e-13	3754	2.00372e-12	2.98203e-09	3.59094e-05	0.0524946	0.947469	PCG
Oli	AD	ENSG00000156170	8	95907994	rs2011567	1.44087e-08	rs4734295	1.975e-09	4259	6.80547e-09	1.95199e-05	1.89482e-05	0.0534018	0.94656	PCG
In	EA	BrainMetalnc.47364	21	34975913	rs2834237	1.08294e-08	rs743316	1.2e-08	3630	2.0219e-06	0.00185884	0.000184084	0.168409	0.829546	LncRNA
Ast	Generalized_epilepsy_all_documented_cases	ENSG00000108439	17	46018871	rs78317601	1.00643e-08	rs4794333	6.81005e-09	2967	2.78365e-07	0.000114903	0.00045408	0.186621	0.812809	PCG
Ast	EA	ENSG00000036257	2	225334866	rs72974238	9.19454e-09	rs72974219	3.05e-08	4024	1.01134e-07	0.000389919	1.16657e-05	0.044021	0.955577	PCG
In	EA	BrainMetalnc.43074	2	183033067	rs1965089	8.85305e-09	rs1527878	3.08e-09	3242	3.03797e-07	0.000271383	0.00011943	0.105793	0.893816	LncRNA
In	AAM	ENSG00000138031	2	25042037	rs73920612	7.99424e-09	rs6712986	6.83723e-12	2809	3.72629e-10	2.32956e-07	0.000117598	0.0725917	0.927291	PCG
Ex	IQ	ENSG00000196666	11	47608229	rs11604825	7.4575e-09	rs11605348	9.728e-09	2639	3.81469e-08	0.000255542	1.67297e-05	0.111182	0.888546	PCG
In	PD	BrainMetalnc.6202	1	205675290	rs708723	7.30314e-09	rs823106	4.1e-10	2843	9.65083e-09	5.9971e-06	0.000102092	0.0625035	0.937388	LncRNA
Ex	EA	ENSG00000271265	6	157095350	rs7773483	6.77052e-09	rs17321729	6.06e-09	3085	4.37769e-07	0.000818791	4.21588e-05	0.0779313	0.921207	LncRNA
In	SCZ	ENSG00000102471	13	80055258	rs2760105	6.21898e-09	rs9545047	3.049e-11	3074	3.72568e-10	1.42944e-06	4.83922e-05	0.184853	0.815097	PCG
Ex	MDD	ENSG00000067560	3	49396571	rs11130208	6.18592e-09	rs9831648	1.586e-08	1688	2.92188e-08	0.000162594	1.38024e-05	0.075882	0.923942	PCG
Ast	SCZ	ENSG00000036257	2	225334866	rs111915841	6.16376e-09	rs72974269	2.76e-10	4032	2.91719e-10	1.19641e-06	8.76626e-06	0.0349876	0.965002	PCG
Oli	MDD	ENSG00000119682	14	75120139	rs11629369	5.1013e-09	rs7152906	1.873e-09	3544	1.9188e-08	3.30189e-05	2.71513e-05	0.0457681	0.954172	PCG
In	AAM	ENSG00000241837	21	35275756	rs2834301	4.48011e-09	rs35184820	6.74493e-09	3630	4.24802e-07	0.000661476	0.000110812	0.171722	0.827505	PCG
In	SCZ	ENSG00000110881	12	50451330	rs376184	4.45052e-09	rs578470	2.327e-08	2390	4.76456e-07	0.00119082	4.10702e-05	0.101751	0.897016	PCG
Oli	AAM	ENSG00000105127	19	15464195	rs7245841	4.42048e-09	rs7245841	3.74141e-08	5361	5.9077e-08	0.000296459	1.03261e-05	0.0508695	0.948824	PCG
Ast	IQ	ENSG00000160957	8	145736670	rs873883	4.17269e-09	rs2721173	2.887e-09	1431	1.79275e-08	4.05607e-05	6.82782e-06	0.0144624	0.98549	PCG
Ast	EA	ENSG00000160957	8	145736670	rs873883	4.17269e-09	rs11774212	2.74e-12	1465	7.20073e-10	1.76899e-06	7.37103e-05	0.180263	0.819662	PCG
Ex	EA	ENSG00000243667	2	68350067	rs12713628	4.14343e-09	rs6731373	3.47e-12	4548	9.983e-10	9.86428e-07	3.41138e-05	0.0327409	0.967224	PCG
In	IQ	ENSG00000130956	9	99212450	rs1885426	3.95001e-09	rs28620532	1.511e-08	3004	2.86487e-07	0.000323338	0.000160548	0.180381	0.819135	PCG
Oli	MDD	ENSG00000173540	3	49757117	rs62262673	3.27693e-09	rs9831648	1.586e-08	1759	1.59027e-08	0.000208979	7.51193e-06	0.097813	0.90197	PCG
Oli	AD	ENSG00000137845	15	58881007	rs12911961	2.71597e-09	rs602602	9.654e-12	3964	3.89841e-11	1.74065e-07	1.06693e-05	0.0466853	0.953304	PCG
Ast	BIP	ENSG00000105926	7	24612886	rs12672003	2.71523e-09	rs12672003	2.718e-09	5304	5.63081e-09	2.73442e-05	4.95191e-06	0.0230705	0.976897	PCG
Ast	EA	ENSG00000105926	7	24612886	rs12672003	2.71523e-09	rs79265434	6.08e-19	5187	7.4625e-18	3.54443e-14	7.87415e-06	0.0364359	0.963556	PCG
Ast	SCZ	ENSG00000105926	7	24612886	rs12672003	2.71523e-09	rs79210963	2.584e-11	5286	3.80997e-11	1.85021e-07	5.12353e-06	0.023905	0.97609	PCG
In	MDD	ENSG00000119682	14	75120139	rs9441	2.35214e-09	rs7152906	1.873e-09	3556	9.83911e-09	3.74839e-05	1.39225e-05	0.0520924	0.947856	PCG
In	IQ	ENSG00000278311	17	34900760	rs3744593	1.96772e-09	rs2285640	2.376e-10	2620	5.50973e-10	8.40576e-06	3.41829e-06	0.0512013	0.948787	PCG
In	SCZ	ENSG00000169592	16	30007384	rs11150580	1.56484e-09	rs3814883	8.817e-15	1535	6.60373e-15	1.20841e-10	1.91646e-06	0.0341032	0.965895	PCG
In	BIP	ENSG00000105926	7	24612886	rs12672003	1.49358e-09	rs12672003	2.718e-09	5335	2.82124e-09	4.6674e-05	2.48109e-06	0.0400868	0.959864	PCG
In	EA	ENSG00000105926	7	24612886	rs12672003	1.49358e-09	rs79265434	6.08e-19	5214	2.65897e-18	4.32728e-14	2.80559e-06	0.0447037	0.955293	PCG
In	SCZ	ENSG00000105926	7	24612886	rs12672003	1.49358e-09	rs79210963	2.584e-11	5317	1.47917e-11	2.44703e-07	1.98914e-06	0.0319389	0.968059	PCG
Ast	BIP	ENSG00000174165	11	66288107	rs74933537	1.31904e-09	rs475805	1.991e-09	1796	1.21456e-09	4.29812e-05	3.80069e-06	0.133634	0.866319	PCG
Ex	SCZ	ENSG00000204961	5	140227356	rs251368	1.18347e-09	rs246024	1.714e-09	2723	1.94913e-10	5.99842e-06	5.16014e-06	0.15796	0.842028	PCG
Oli	BIP	ENSG00000185630	1	164524820	rs4112578	1.13062e-09	rs10737496	7.172e-09	3863	4.43183e-09	0.000137272	4.11672e-06	0.126638	0.87322	PCG
Ex	EA	BrainMetalnc.69781	7	74988523	rs794375	1.10422e-09	rs1167827	2.31e-08	1670	2.34097e-07	0.000721698	6.79709e-06	0.0199754	0.979296	LncRNA
Ast	EA	ENSG00000120088	17	43861645	rs62062278	1.08298e-09	rs74998289	1.31e-17	1279	3.73159e-18	2.9519e-13	2.38178e-06	0.1876	0.812398	PCG
In	BIP	BrainMetalnc.71375	7	140426318	rs11762469	1.05892e-09	rs10255167	1.599e-08	3016	3.14153e-08	9.84864e-05	9.69729e-06	0.0294303	0.970461	LncRNA
In	SCZ	ENSG00000133687	12	29653772	rs10843506	7.59951e-10	rs7312697	4.849e-11	5606	3.62648e-11	2.45771e-07	2.31654e-06	0.0147142	0.985283	PCG
In	EA	ENSG00000181222	17	7387684	rs56078345	6.24713e-10	rs2302761	1e-10	3436	8.16586e-11	2.62191e-06	1.58653e-06	0.0499906	0.950005	PCG
In	SmokingInitiation	ENSG00000112249	6	100956069	rs12530388	6.08579e-10	rs846799	3.87e-09	3327	5.17796e-09	3.47568e-05	2.26764e-05	0.151366	0.848577	PCG
In	AAM	BrainMetalnc.48525	22	31291210	rs12167144	5.59794e-10	rs5753407	4.64713e-09	3007	7.61994e-09	6.70212e-05	1.15467e-05	0.10066	0.899262	LncRNA
In	IQ	BrainMetalnc.48525	22	31291210	rs12167144	5.59794e-10	rs5753383	4.998e-08	2969	4.06472e-08	0.000357497	7.0746e-06	0.0612835	0.938352	LncRNA
Ex	EA	ENSG00000254685	1	74663895	rs12044425	5.44896e-10	rs1569092	1.16e-14	3207	1.52189e-14	5.77158e-10	1.60147e-06	0.0597936	0.940205	PCG
Ast	SmokingInitiation	ENSG00000167720	17	2206676	rs113423156	4.84935e-10	rs11658881	2.43e-08	4281	4.5365e-07	0.0023308	3.4881e-05	0.178395	0.819239	PCG
Oli	SCZ	ENSG00000170571	5	49692025	rs4563580	4.63463e-10	rs7293426	7.327e-10	2163	1.87428e-11	3.14925e-06	8.13815e-07	0.135877	0.864119	PCG
Ast	EA	BrainMetalnc.51252	3	56598406	rs111349193	4.38587e-10	rs7625428	1.26e-08	3607	9.21705e-08	0.00338009	4.76234e-06	0.173823	0.822793	LncRNA
Ast	AAM	ENSG00000172262	5	43067682	rs6884303	3.83871e-10	rs35375873	3.3644e-12	2854	2.23627e-11	9.14141e-07	3.86649e-06	0.157211	0.842784	PCG
In	IQ	BrainMetalnc.12366	11	47653295	rs11605348	3.45019e-10	rs11605348	9.728e-09	2734	1.96922e-09	0.000103926	8.62983e-07	0.044589	0.955306	LncRNA
In	IQ	BrainMetalnc.47538	21	40534168	rs34672724	3.38368e-10	rs2836921	6.537e-12	5148	1.37425e-12	2.66064e-07	5.99926e-07	0.115265	0.884735	LncRNA
In	Neuroticism	ENSG00000104447	8	116420723	rs2142331	3.11265e-10	rs2737219	2.796e-08	2787	1.67101e-08	0.000537975	4.01737e-07	0.0119463	0.987515	PCG
Ex	Neuroticism	ENSG00000103496	16	31044209	rs4889685	2.85747e-10	rs3751855	7.634e-11	1709	1.12524e-10	4.10922e-06	3.32082e-06	0.120392	0.879601	PCG
Ex	PD	ENSG00000103496	16	31044209	rs4889685	2.85747e-10	rs12934900	4.331e-11	1785	1.73262e-11	6.32772e-07	2.46393e-06	0.0890743	0.910923	PCG
Ex	Juvenile_myoclonic_epilepsy	ENSG00000103496	16	31044209	rs4889685	2.85747e-10	rs1046276	2.49977e-11	1188	1.10302e-10	2.85255e-06	8.24986e-07	0.0203555	0.979641	PCG
In	EA	BrainMetalnc.36474	19	19618760	rs2905426	1.99142e-10	rs10417097	5.17e-09	2959	3.24419e-09	0.000317266	1.07282e-06	0.104021	0.895661	LncRNA
In	SCZ	BrainMetalnc.36474	19	19618760	rs2905426	1.99142e-10	rs1858999	7.971e-14	2890	8.11237e-15	8.09756e-10	8.1253e-07	0.0801848	0.919814	LncRNA
Ex	SCZ	ENSG00000238083	17	44588876	rs3874943	1.89492e-10	rs7225002	1.185e-09	3640	3.62503e-10	2.64258e-06	2.47793e-05	0.179817	0.820156	PCG
In	IQ	ENSG00000185658	21	40556101	rs10427502	1.74066e-10	rs2836921	6.537e-12	5183	3.39654e-12	2.71456e-07	1.48258e-06	0.117608	0.88239	PCG
Ast	MDD	ENSG00000124140	20	44651481	rs13037326	1.54844e-10	rs13037326	2.398e-10	3528	3.20541e-11	1.065e-06	1.73818e-07	0.00477989	0.995219	PCG
Ast	Neuroticism	ENSG00000124140	20	44651481	rs13037326	1.54844e-10	rs2425752	6.459e-11	3567	2.49199e-11	8.27958e-07	1.63589e-07	0.00443965	0.995559	PCG
Ex	IQ	BrainMetalnc.47538	21	40534168	rs8131126	1.42823e-10	rs2836921	6.537e-12	5134	9.74282e-13	2.20916e-07	4.25319e-07	0.0955355	0.904464	LncRNA
Ex	AAM	BrainMetalnc.69738	7	74047306	rs2529287	1.33933e-10	rs35005436	3.74827e-16	1297	2.48648e-14	2.42656e-10	1.70841e-05	0.16589	0.834093	LncRNA
Ast	ALS	ENSG00000092108	14	31091496	rs7153509	1.30987e-10	rs229243	5.409e-15	2662	1.57008e-16	2.66087e-11	3.64909e-07	0.0609032	0.939096	PCG
In	IQ	ENSG00000196072	10	102033036	rs3750707	1.26617e-10	rs1408579	5.23e-09	3193	5.43922e-08	0.0012861	8.16852e-06	0.192338	0.806367	PCG
In	AD	ENSG00000108219	10	82213921	rs873257	1.2153e-10	rs6586028	1.329e-14	4906	3.70532e-15	1.61625e-10	9.58947e-07	0.0408699	0.959129	PCG
In	Neuroticism	BrainMetalnc.5349	1	174784261	rs72717637	1.13678e-10	rs7536102	1.703e-09	3318	3.92279e-10	5.43037e-05	1.40346e-06	0.193477	0.806467	LncRNA
Ex	EA	ENSG00000264589	17	43876755	rs62057151	1.09013e-10	rs74998289	1.31e-17	1283	6.33293e-19	2.51644e-13	4.04218e-07	0.159779	0.84022	LncRNA
In	IQ	ENSG00000175470	10	133747954	rs7079591	1.06641e-10	rs7921305	1.769e-08	5180	3.28243e-08	0.00170177	3.80065e-06	0.196242	0.802052	PCG
Ast	EA	ENSG00000110328	11	11292423	rs10831656	9.63916e-11	rs7928622	2.52e-08	5295	1.22179e-08	0.000166266	1.66859e-07	0.00127213	0.998561	PCG
Ex	AAM	BrainMetalnc.3706	1	102337367	rs11164371	9.60007e-11	rs4265447	9.25433e-14	4152	9.70788e-15	1.43065e-09	7.9824e-08	0.0107744	0.989226	LncRNA
Ast	PD	ENSG00000170425	17	15848230	rs2779210	8.86788e-11	rs4566208	3.884e-08	3168	2.14338e-10	9.19826e-05	3.22113e-07	0.137372	0.862536	PCG
Ast	MDD	ENSG00000119682	14	75120139	rs1045430	7.96515e-11	rs7152906	1.873e-09	3565	1.36861e-10	1.44874e-05	1.93661e-07	0.0195194	0.980466	PCG
In	EA	BrainMetalnc.43073	2	183053837	rs1965089	7.51016e-11	rs1527878	3.08e-09	3282	4.86524e-09	0.000440531	1.91285e-06	0.172375	0.827183	LncRNA
Ex	EA	ENSG00000272391	7	75046066	rs236671	7.24322e-11	rs1167827	2.31e-08	1762	2.69302e-08	0.00142938	7.80973e-07	0.0404939	0.958076	PCG
In	EA	ENSG00000111877	6	119134604	rs12194458	7.23659e-11	rs10456918	3.67e-11	3506	1.70029e-12	7.15432e-07	2.31777e-07	0.0966216	0.903377	PCG
In	EA	ENSG00000272391	7	75046066	rs236671	6.0038e-11	rs1167827	2.31e-08	1751	1.04941e-08	0.00114179	3.04338e-07	0.0321463	0.966712	PCG
Oli	EA	ENSG00000120088	17	43861645	rs62062278	5.6376e-11	rs74998289	1.31e-17	1296	2.23854e-19	2.75007e-13	1.42888e-07	0.174714	0.825286	PCG
In	MDD	BrainMetalnc.60706	5	87564695	rs3099438	5.40533e-11	rs3099439	2.777e-08	1774	1.16331e-09	0.000458724	8.76483e-08	0.0335963	0.965945	LncRNA
In	SmokingInitiation	BrainMetalnc.60706	5	87564695	rs3099438	5.40533e-11	rs4571506	1.09e-14	1797	7.64521e-16	3.18775e-10	9.58387e-08	0.0389999	0.961	LncRNA
Ast	AAM	ENSG00000105127	19	15464195	rs6512030	5.08263e-11	rs7245841	3.74141e-08	5346	1.40042e-09	0.000303311	2.44782e-07	0.0520686	0.947628	PCG
Ex	Neuroticism	ENSG00000008838	17	38175349	rs11078930	3.93816e-11	rs35982947	6.022e-09	2862	6.92066e-09	0.0014441	9.48133e-07	0.197041	0.801514	PCG
In	SCZ	BrainMetalnc.73021	8	38178699	rs28439472	3.90487e-11	rs7816998	3.105e-10	2431	6.66897e-12	4.1194e-06	3.11501e-07	0.191605	0.808391	LncRNA
Ast	SCZ	ENSG00000170571	5	49692025	rs2199085	3.71292e-11	rs7293426	7.327e-10	2174	1.53814e-12	3.01224e-06	6.67859e-08	0.129921	0.870075	PCG
In	AD	ENSG00000156170	8	95907994	rs2011567	3.68785e-11	rs4734295	1.975e-09	4262	3.1244e-11	1.93563e-05	8.69913e-08	0.0529458	0.947035	PCG
In	EA	BrainMetalnc.51252	3	56598406	rs111349193	3.07639e-11	rs7625428	1.26e-08	3605	9.1687e-09	0.00343501	4.73735e-07	0.176663	0.819901	LncRNA
In	AAM	ENSG00000174939	16	29911695	rs8059619	2.45279e-11	rs57149692	6.22853e-11	1478	6.13981e-12	4.64677e-06	1.12918e-07	0.0845434	0.915452	PCG
Ast	PD	BrainMetalnc.68409	7	23226859	rs955187	2.43861e-11	rs858295	3.831e-09	4277	4.46276e-11	8.40219e-06	2.42642e-07	0.0447277	0.955264	LncRNA
Ast	IQ	ENSG00000081377	9	99253618	rs10761086	1.78811e-11	rs1057687	2.02e-08	2973	2.96519e-10	0.000179422	1.46444e-07	0.0877	0.91212	PCG
Oli	EA	ENSG00000162545	1	20808883	rs77645371	1.70514e-11	rs74701752	2.38e-08	3900	1.47762e-08	0.000688591	9.92474e-07	0.0452967	0.954014	PCG
In	AD	ENSG00000120885	8	27454433	rs2279590	1.53543e-11	rs867230	1.495e-33	4821	4.63265e-35	1.33272e-29	4.53462e-08	0.0120573	0.987943	PCG
Ast	AAM	ENSG00000133103	13	40229763	rs9548884	1.38972e-11	rs11618582	2.66401e-12	4119	1.24549e-13	2.61635e-07	8.86881e-08	0.185488	0.814512	PCG
Ex	SCZ	ENSG00000116127	2	73612885	rs10469966	1.28713e-11	rs6546857	2.8e-09	2477	3.14637e-11	2.60626e-05	1.15662e-07	0.0949025	0.905071	PCG
In	Neuroticism	ENSG00000142599	1	8412456	rs2120461	6.92361e-12	rs12137398	3.364e-09	3545	3.49098e-10	0.00102204	3.99728e-08	0.116144	0.882834	PCG
In	SCZ	ENSG00000142599	1	8412456	rs2120461	6.92361e-12	rs11121172	7.152e-10	3675	9.86134e-13	2.88776e-06	1.35436e-08	0.0386995	0.961298	PCG
In	EA	BrainMetalnc.5371	1	175837884	rs565960	6.87453e-12	rs4652135	1.54e-10	3544	3.6355e-12	2.67965e-06	1.40817e-08	0.0093887	0.990609	LncRNA
Oli	AAM	ENSG00000138031	2	25042037	rs13393590	4.73407e-12	rs6712986	6.83723e-12	2810	4.22322e-13	3.82396e-07	1.33281e-07	0.119801	0.880199	PCG
Ex	AAM	ENSG00000126267	19	36139224	rs61218414	4.4644e-12	rs12151356	2.99365e-13	3564	4.33078e-15	7.23374e-09	4.42659e-08	0.0730109	0.926989	PCG
Ex	AD	ENSG00000174226	8	101585116	rs1786345	4.02019e-12	rs1693551	1.785e-08	2918	1.45211e-10	8.13396e-05	2.09095e-08	0.0107232	0.989195	PCG
In	EA	BrainMetalnc.51250	3	56588639	rs73079863	3.50871e-12	rs7625428	1.26e-08	3617	1.05393e-09	0.00346786	5.44559e-08	0.178364	0.818168	LncRNA
In	Neuroticism	BrainMetalnc.42253	2	148817350	rs998884	3.36829e-12	rs2042555	3.764e-14	2487	9.15313e-16	1.49391e-09	1.44106e-08	0.0225425	0.977457	LncRNA
Ex	EA	ENSG00000115252	2	183004762	rs1965089	3.27355e-12	rs1527878	3.08e-09	3182	4.00012e-11	0.000102359	1.57169e-08	0.0392571	0.960641	PCG
Oli	AAM	ENSG00000174939	16	29911695	rs3924855	2.40445e-12	rs57149692	6.22853e-11	1481	1.21898e-12	3.77615e-06	2.24184e-08	0.0685161	0.93148	PCG
In	EA	BrainMetalnc.31543	17	43611328	rs112431991	8.94668e-13	rs74998289	1.31e-17	1674	8.11905e-21	2.82126e-13	5.18373e-09	0.179307	0.820693	LncRNA
Ast	EA	BrainMetalnc.51250	3	56588639	rs73079884	8.58051e-13	rs7625428	1.26e-08	3619	2.75795e-10	0.00340741	1.42502e-08	0.175238	0.821355	LncRNA
Ast	IQ	ENSG00000140323	15	40650419	rs56221586	5.07548e-13	rs11634187	1.118e-08	3105	5.61457e-11	0.000257783	7.28534e-09	0.0324821	0.96726	PCG
In	AAM	BrainMetalnc.65331	6	76401189	rs17499394	3.85021e-13	rs111477662	1.13227e-09	2974	5.99404e-14	1.00311e-05	5.31557e-10	0.0880445	0.911945	LncRNA
Ex	AAM	ENSG00000105127	19	15464195	rs7245841	2.2277e-13	rs7245841	3.74141e-08	5337	1.42105e-11	0.000209676	2.48386e-09	0.0356852	0.964105	PCG
Oli	EA	ENSG00000181754	1	110046799	rs14184	2.16602e-13	rs59123361	5.87e-13	3360	4.75574e-15	5.22153e-08	8.01641e-09	0.0871027	0.912897	PCG
Ast	EA	BrainMetalnc.7883	10	12660916	rs56155004	1.67506e-13	rs11257930	2.99e-09	5056	9.15333e-12	0.000153189	2.96762e-09	0.0487146	0.951132	LncRNA
Ast	AAM	ENSG00000070061	9	111629177	rs10979586	1.59105e-13	rs72607161	3.33705e-12	4948	2.91958e-15	1.19049e-07	4.87359e-09	0.197923	0.802077	PCG
In	EA	ENSG00000236104	6	33282182	rs1061801	1.13483e-13	rs1061801	8.34e-10	2870	6.019e-13	9.90381e-06	1.86752e-10	0.00207495	0.997915	PCG
In	SCZ	BrainMetalnc.66874	6	143654851	rs2161972	1.11559e-13	rs9390083	2.95e-08	3269	7.26068e-12	0.000173808	4.55126e-10	0.00990496	0.989921	LncRNA
Ast	Neuroticism	ENSG00000142599	1	8412456	rs1763838	9.79344e-14	rs12137398	3.364e-09	3554	7.85489e-12	0.000893305	8.99381e-10	0.101385	0.897721	PCG
Ast	SCZ	ENSG00000142599	1	8412456	rs1763838	9.79344e-14	rs11121172	7.152e-10	3684	2.55906e-14	2.91115e-06	3.51463e-10	0.039021	0.960976	PCG
In	SCZ	ENSG00000204520	6	31367560	rs112243036	9.64095e-14	rs9267091	1.652e-10	714	8.47165e-13	1.81088e-05	3.59341e-09	0.0758876	0.924094	PCG
In	SCZ	BrainMetalnc.65509	6	84320511	rs2023569	5.54779e-14	rs2022265	3.739e-10	2866	2.11417e-14	3.23344e-06	5.23752e-10	0.0791823	0.920814	LncRNA
In	MDD	ENSG00000173540	3	49757117	rs62262722	4.23519e-14	rs9831648	1.586e-08	1763	1.34024e-12	0.000215573	6.33088e-10	0.100931	0.898854	PCG
Ex	PD	BrainMetalnc.68409	7	23226859	rs1881200	3.52581e-14	rs858295	3.831e-09	4290	3.9597e-14	8.84766e-06	2.1529e-10	0.0471522	0.952839	LncRNA
In	PD	BrainMetalnc.30280	17	15905348	rs11652025	2.76384e-14	rs4566208	3.884e-08	3133	5.5687e-14	8.7031e-05	8.36873e-11	0.129922	0.869991	LncRNA
In	SCZ	BrainMetalnc.25764	15	83022578	rs2278355	2.54793e-14	rs4779050	4.175e-10	1957	4.52813e-14	4.62146e-06	5.52791e-10	0.055474	0.944521	LncRNA
In	Neuroticism	ENSG00000283839	2	185458303	rs1019706	2.05311e-14	rs1019706	7.668e-09	3832	1.2715e-12	8.02993e-05	5.32157e-11	0.00236318	0.997557	LncRNA
In	EA	ENSG00000271265	6	157095350	rs4870483	2.86542e-15	rs17321729	6.06e-09	3119	8.37586e-13	0.000815284	8.06655e-11	0.077596	0.921589	LncRNA
Ast	EA	ENSG00000167491	19	19496634	rs12975119	1.68256e-15	rs10417097	5.17e-09	3128	3.40498e-14	0.000386626	1.12705e-11	0.127101	0.872513	PCG
Ast	SCZ	ENSG00000167491	19	19496634	rs12975119	1.68256e-15	rs1858999	7.971e-14	3055	3.91532e-20	4.47303e-10	3.92156e-12	0.0438454	0.956155	PCG
In	EA	ENSG00000181754	1	110046799	rs14184	1.59476e-15	rs59123361	5.87e-13	3322	4.78744e-17	4.88009e-08	8.06988e-11	0.081342	0.918658	PCG
In	EA	BrainMetalnc.69781	7	74988523	rs794379	1.39694e-15	rs1167827	2.31e-08	1658	2.44092e-13	0.000907607	7.0875e-12	0.0253798	0.973713	LncRNA
In	SCZ	BrainMetalnc.52808	3	136446391	rs4408829	9.46423e-16	rs7432375	5.322e-15	2912	2.24559e-20	2.8027e-10	1.34142e-11	0.166587	0.833413	LncRNA
In	IQ	BrainMetalnc.73585	8	66502321	rs7464223	6.42771e-16	rs13276212	4.478e-08	3128	3.02445e-14	0.00174491	3.1222e-12	0.179311	0.818944	LncRNA
Oli	AD	ENSG00000174226	8	101585116	rs1693560	2.71556e-16	rs1693551	1.785e-08	2868	5.11469e-15	4.93928e-05	7.36481e-13	0.00611841	0.993832	PCG
In	AAM	ENSG00000173517	15	77392997	rs7177055	1.43493e-17	rs62009090	4.38035e-09	3252	4.58099e-16	0.000210388	8.32185e-14	0.0372567	0.962533	PCG
In	MDD	ENSG00000124140	20	44651481	rs4578918	3.24942e-18	rs13037326	2.398e-10	3501	2.11001e-18	1.15585e-06	1.14419e-14	0.00527303	0.994726	PCG
In	Neuroticism	ENSG00000124140	20	44651481	rs4578918	3.24942e-18	rs2425752	6.459e-11	3541	1.38053e-18	7.57855e-07	9.06274e-15	0.00397904	0.99602	PCG
Ex	IQ	ENSG00000104442	8	66514692	rs7464223	2.07495e-18	rs13276212	4.478e-08	3133	8.0653e-17	0.0018062	8.32606e-15	0.185647	0.812547	PCG
In	IQ	ENSG00000109919	11	47638866	rs11605348	9.76132e-19	rs11605348	9.728e-09	2710	2.48108e-17	0.000157121	1.0876e-14	0.0679431	0.9319	PCG
In	AAM	ENSG00000224086	22	22292956	rs5995269	5.42432e-19	rs1005579	1.17216e-09	3219	2.34975e-18	2.03808e-05	3.37183e-15	0.0282743	0.971705	LncRNA
Ast	Neuroticism	BrainMetalnc.27722	16	31004918	rs12445568	5.21456e-19	rs3751855	7.634e-11	1767	2.83482e-19	2.7633e-06	8.30052e-15	0.079991	0.920006	LncRNA
In	IQ	ENSG00000104442	8	66514692	rs6472217	3.46054e-20	rs13276212	4.478e-08	3122	9.46127e-19	0.00157628	9.76704e-17	0.161885	0.836538	PCG
In	EA	BrainMetalnc.59302	5	26868299	rs7722503	3.25258e-20	rs17563464	2.89e-12	4217	4.0064e-21	8.79896e-07	3.12759e-16	0.0677567	0.932242	LncRNA
In	EA	ENSG00000167491	19	19496634	rs34277109	1.15523e-21	rs10417097	5.17e-09	3135	1.84756e-20	0.000447431	6.11471e-18	0.14723	0.852323	PCG
In	SCZ	ENSG00000167491	19	19496634	rs34277109	1.15523e-21	rs1858999	7.971e-14	3058	3.40243e-26	8.34734e-10	3.40785e-18	0.0826891	0.917311	PCG
In	SCZ	ENSG00000116127	2	73612885	rs6736866	3.28499e-22	rs6546857	2.8e-09	2483	1.30049e-21	3.08958e-05	4.78066e-18	0.112687	0.887282	PCG
Ex	AAM	ENSG00000224086	22	22292956	rs240066	1.35048e-22	rs1005579	1.17216e-09	3177	8.6402e-22	1.86848e-05	1.23984e-18	0.0258379	0.974143	LncRNA
Ex	EA	BrainMetalnc.73146	8	42283254	rs2923400	1.38448e-23	rs2923431	9.84e-11	2380	6.35975e-24	3.53886e-06	1.67142e-19	0.0920979	0.907899	LncRNA
In	AAM	ENSG00000172262	5	43067682	rs6870418	7.85571e-24	rs35375873	3.3644e-12	2840	1.89151e-24	6.65263e-07	3.27041e-19	0.114137	0.885862	PCG
Ex	SCZ	BrainMetalnc.14650	11	124610986	rs12293670	8.55937e-25	rs1940171	8.871e-14	4468	1.38714e-27	2.67116e-09	2.71777e-20	0.0513865	0.948614	LncRNA
In	SCZ	ENSG00000170571	5	49692025	rs4865638	5.6535e-29	rs7293426	7.327e-10	2155	4.67384e-30	2.89796e-06	2.02938e-25	0.124955	0.875042	PCG
In	AAM	BrainMetalnc.2933	1	72748098	rs11209943	6.20458e-32	rs3101336	3.91655e-15	2429	4.33928e-37	2.89514e-11	2.66246e-28	0.0167806	0.983219	LncRNA
In	MDD	BrainMetalnc.2933	1	72748098	rs11209943	6.20458e-32	rs6699744	1.498e-18	2456	6.67764e-40	4.45707e-14	4.62325e-28	0.0298883	0.970112	LncRNA
In	EA	ENSG00000186868	17	43971892	rs111676341	1.8697e-32	rs74998289	1.31e-17	1182	2.75588e-40	2.63561e-13	1.75701e-28	0.167201	0.832799	PCG
In	EA	ENSG00000285940	18	35145243	rs11082013	1.41865e-32	rs9964724	2.66e-27	3626	8.14952e-48	7.67777e-22	1.0747e-27	0.10035	0.89965	LncRNA
In	MDD	ENSG00000285940	18	35145243	rs11082013	1.41865e-32	rs4799949	1.403e-10	3672	1.27956e-31	1.20557e-05	1.23504e-27	0.115478	0.88451	LncRNA
In	Neuroticism	ENSG00000285940	18	35145243	rs11082013	1.41865e-32	rs6507216	1.903e-20	3611	1.64312e-41	1.54448e-15	4.57508e-28	0.0420462	0.957954	LncRNA
In	SCZ	BrainMetalnc.14650	11	124610986	rs12293670	3.1937e-40	rs1940171	8.871e-14	4483	3.34143e-43	2.48028e-09	6.54676e-36	0.047643	0.952357	LncRNA
Ex	IQ	ENSG00000109919	11	47638866	rs1064608	6.21531e-44	rs11605348	9.728e-09	2723	2.58092e-43	0.000103633	1.13136e-40	0.0444728	0.955424	PCG
In	EA	BrainMetalnc.73146	8	42283254	rs2974337	5.20618e-65	rs2923431	9.84e-11	2364	3.37152e-66	6.37149e-06	8.86024e-62	0.166607	0.833386	LncRNA
In	AN	ENSG00000170430	10	131265453	rs11016862	5.20845e-07	rs2008387	1.725e-08	4469	1.58262e-05	0.00027482	0.00750363	0.129437	0.862768	PCG
In	AN	ENSG00000119737	2	54080048	rs12162343	3.79748e-07	rs2287348	5.619e-09	4336	5.5334e-06	0.000158293	0.00409949	0.116394	0.879343	PCG
Ast	AN	ENSG00000287466	10	131420251	rs502076	1.9978e-07	rs2008387	1.725e-08	4687	1.39906e-06	0.000148032	0.000663513	0.0692752	0.929912	LncRNA
In	CP	ENSG00000233621	1	37816534	rs75785507	4.25219e-08	rs875361	1.5e-08	3647	3.74196e-05	0.00420702	0.00153708	0.17199	0.822229	LncRNA
In	CP	BrainMetalnc.1916	1	37920342	rs75785507	1.11316e-08	rs875361	1.5e-08	3600	1.10783e-05	0.00417006	0.000454763	0.170356	0.825008	LncRNA
In	CP	BrainMetalnc.12363	11	47622447	rs10838724	5.31515e-07	rs1064608	2.86e-10	2674	8.84305e-08	2.21402e-06	0.00192352	0.0472079	0.950866	LncRNA
In	CP	ENSG00000109919	11	47638866	rs11605348	9.76132e-19	rs1064608	2.86e-10	2707	5.75882e-19	3.61453e-06	1.25281e-14	0.0777102	0.922286	PCG
In	CP	BrainMetalnc.12366	11	47653295	rs11605348	3.45019e-10	rs1064608	2.86e-10	2731	3.49965e-11	1.84672e-06	7.61488e-07	0.039222	0.960775	LncRNA
In	CP	ENSG00000087053	11	95554929	rs7110786	1.92317e-08	rs602512	2.92e-11	3069	8.59712e-11	3.09018e-07	2.78208e-05	0.0990994	0.900872	PCG
In	CP	ENSG00000197728	12	56435134	rs7297175	1.71958e-51	rs10876864	5.95e-09	2505	2.62099e-51	6.31883e-05	4.27635e-49	0.00931905	0.990618	PCG
In	CP	BrainMetalnc.25777	15	83316458	rs899747	3.81025e-08	rs12439619	7.94e-11	1894	1.57357e-07	1.45495e-05	0.00196302	0.180686	0.817336	LncRNA
In	CP	BrainMetalnc.28391	16	62070322	rs72787533	4.90596e-08	rs12446238	2.77e-10	3114	3.22082e-08	5.84366e-06	0.000410881	0.0736217	0.925962	LncRNA
In	CP	ENSG00000278311	17	34900760	rs8078390	1.91924e-09	rs35258073	5.76e-11	2794	4.39137e-11	8.14223e-07	2.56849e-06	0.0466702	0.953326	PCG
In	CP	BrainMetalnc.47538	21	40534168	rs34672724	3.38368e-10	rs2836921	4.21e-08	5287	1.58455e-09	0.000301905	6.21457e-07	0.117524	0.882173	LncRNA
In	CP	ENSG00000185658	21	40556101	rs10427502	1.74066e-10	rs2836921	4.21e-08	5321	4.15812e-09	0.000329722	1.63093e-06	0.128455	0.871214	PCG
In	CP	ENSG00000128268	22	39853016	rs5750823	4.81395e-07	rs73167342	2.3e-12	2902	2.36981e-10	2.33908e-08	0.000469881	0.0454246	0.954106	PCG
In	CP	ENSG00000183066	22	42394728	rs133292	1.02935e-10	rs5751191	8.93e-15	3427	7.29673e-15	2.38579e-09	4.33946e-07	0.141027	0.858973	PCG
In	CP	BrainMetalnc.49031	22	42411288	rs133294	1.23011e-07	rs5751191	8.93e-15	3438	6.61953e-12	2.43563e-09	0.000393715	0.14401	0.855596	LncRNA
In	CP	ENSG00000100197	22	42522500	rs2743459	1.5123e-15	rs5751191	8.93e-15	3549	1.70218e-19	2.1878e-09	1.01175e-11	0.129169	0.870831	PCG
In	CP	BrainMetalnc.52782	3	135850986	rs1393787	1.01128e-27	rs9826454	4.17e-08	2662	1.41388e-25	0.00036567	7.33397e-23	0.188867	0.810767	LncRNA
In	CP	BrainMetalnc.55259	4	17811315	rs6817306	4.25211e-08	rs16895888	1.8e-10	3873	3.59719e-09	4.99792e-06	0.000121546	0.168043	0.83183	LncRNA
In	CP	BrainMetalnc.60717	5	87970061	rs7721099	1.5417e-08	rs13163336	5.04e-16	1987	6.94683e-14	3.8475e-11	0.000293264	0.161586	0.838121	LncRNA
In	CP	ENSG00000081377	9	99253618	rs10990975	2.75447e-08	rs10990610	8.69e-11	3025	1.95445e-09	1.50835e-06	0.000154973	0.11872	0.881124	PCG
In	CP	BrainMetalnc.77450	9	99257223	rs10820745	4.78734e-08	rs10990610	8.69e-11	3024	3.3252e-09	1.81924e-06	0.000263659	0.143393	0.856342	LncRNA
Ex	CP	ENSG00000196666	11	47608229	rs11604825	7.4575e-09	rs1064608	2.86e-10	2637	7.04032e-10	4.71475e-06	1.53108e-05	0.101635	0.898345	PCG
Ex	CP	ENSG00000109919	11	47638866	rs1064608	6.21531e-44	rs1064608	2.86e-10	2718	4.07459e-45	1.63489e-06	8.86404e-41	0.0346006	0.965398	PCG
Ex	CP	ENSG00000197728	12	56435134	rs10876864	8.42267e-14	rs10876864	5.95e-09	2507	1.83522e-12	2.49753e-05	2.99428e-10	0.003078	0.996897	PCG
Ex	CP	ENSG00000278535	17	34948308	rs1075218	2.99941e-13	rs35258073	5.76e-11	2740	4.57942e-14	1.07759e-06	2.67851e-09	0.0620906	0.937908	PCG
Ex	CP	ENSG00000225190	17	43513265	rs111273167	6.18782e-08	rs113322852	1.5e-12	1794	2.15385e-11	3.25489e-08	0.000103932	0.156219	0.843677	PCG
Ex	CP	ENSG00000279685	17	43973148	rs111519055	2.92787e-07	rs113322852	1.5e-12	1193	5.78396e-11	2.35053e-08	0.000276914	0.111646	0.888077	LncRNA
Ex	CP	BrainMetalnc.47538	21	40534168	rs8131126	1.42823e-10	rs2836921	4.21e-08	5273	1.2139e-09	0.000273547	4.76077e-07	0.106389	0.893337	LncRNA
Ex	CP	ENSG00000100197	22	42522500	rs133348	1.21808e-07	rs5751191	8.93e-15	3553	1.44216e-11	2.72903e-09	0.000857188	0.16137	0.837773	PCG
Ex	CP	BrainMetalnc.75363	8	145732129	rs10108836	2.83595e-08	rs2721173	6.13e-09	1548	1.27055e-06	0.000346343	0.000368896	0.0996588	0.899625	LncRNA
Ast	CP	ENSG00000233621	1	37816534	rs75785507	1.12155e-11	rs875361	1.5e-08	3673	1.70478e-08	0.00416154	7.00377e-07	0.170143	0.825695	LncRNA
Ast	CP	ENSG00000109919	11	47638866	rs10838724	2.77262e-07	rs1064608	2.86e-10	2747	3.28538e-08	5.38865e-06	0.00071478	0.116354	0.882925	PCG
Ast	CP	ENSG00000087053	11	95554929	rs518919	2.81721e-08	rs602512	2.92e-11	3071	3.75473e-10	4.6941e-07	0.000121506	0.151056	0.848822	PCG
Ast	CP	ENSG00000197728	12	56435134	rs10876864	3.44717e-30	rs10876864	5.95e-09	2501	4.2471e-29	2.49749e-05	6.9295e-27	0.00307796	0.996897	PCG
Ast	CP	ENSG00000140323	15	40650419	rs56221586	5.07548e-13	rs12441495	1.24e-09	3194	1.99317e-11	9.14957e-05	1.09849e-08	0.0494752	0.950433	PCG
Ast	CP	ENSG00000100116	22	38203911	rs8140423	3.36245e-08	rs4396807	2.77e-08	3594	5.47487e-06	0.00243954	0.000331578	0.146897	0.850326	PCG
Ast	CP	ENSG00000188338	3	50242678	rs2236940	1.70332e-07	rs2352974	5.19e-29	2056	7.20129e-26	1.27917e-23	0.000585909	0.103179	0.896235	PCG
Ast	CP	ENSG00000152348	5	81267841	rs4293895	8.43036e-08	rs658912	1.5e-08	3354	1.60921e-05	0.00605802	0.000434369	0.162691	0.8308	PCG
Ast	CP	ENSG00000160957	8	145736670	rs873883	4.17269e-09	rs2721173	6.13e-09	1540	3.25263e-08	7.99113e-05	9.44404e-06	0.0222246	0.977686	PCG
Ast	CP	ENSG00000081377	9	99253618	rs10761086	1.78811e-11	rs10990610	8.69e-11	3027	2.58836e-12	1.55513e-06	2.0524e-07	0.122434	0.877564	PCG
Ast	CP	BrainMetalnc.77450	9	99257223	rs10820745	6.79475e-07	rs10990610	8.69e-11	3026	2.75868e-08	1.73948e-06	0.00218741	0.137066	0.860745	LncRNA
Ast	CP	BrainMetalnc.77451	9	99263078	rs7031988	2.57107e-07	rs10990610	8.69e-11	3019	6.02254e-09	1.45826e-06	0.000477314	0.114689	0.884832	LncRNA
Oli	CP	ENSG00000196666	11	47608229	rs12803191	9.0288e-07	rs1064608	2.86e-10	2655	2.98455e-08	2.99902e-06	0.000649072	0.0642867	0.935061	PCG
Oli	CP	ENSG00000197728	12	56435134	rs10876864	1.34101e-24	rs10876864	5.95e-09	2493	2.42427e-23	2.50554e-05	3.95538e-21	0.00309108	0.996884	PCG
